# Supplementary material for: Multiplexed Host-Induced Gene Silencing of Aspergillus flavus Genes Confers Aflatoxin Resistance in Groundnut
Source: MDPI journal article supplement (doi:10.3390/toxins15050319), 2023-05-05

## Supplementary Materials: Multiplexed Host-Induced Gene Silencing of *Aspergillus flavus* Genes Confers Aflatoxin Resistance in Groundnut

Kalyani Prasad, Kalenahalli Yogendra, Hemalatha Sanivarapu, Kanniah Rajasekaran, Jeffrey W. Cary, Kiran K. Sharma and Pooja Bhatnagar-Mathur

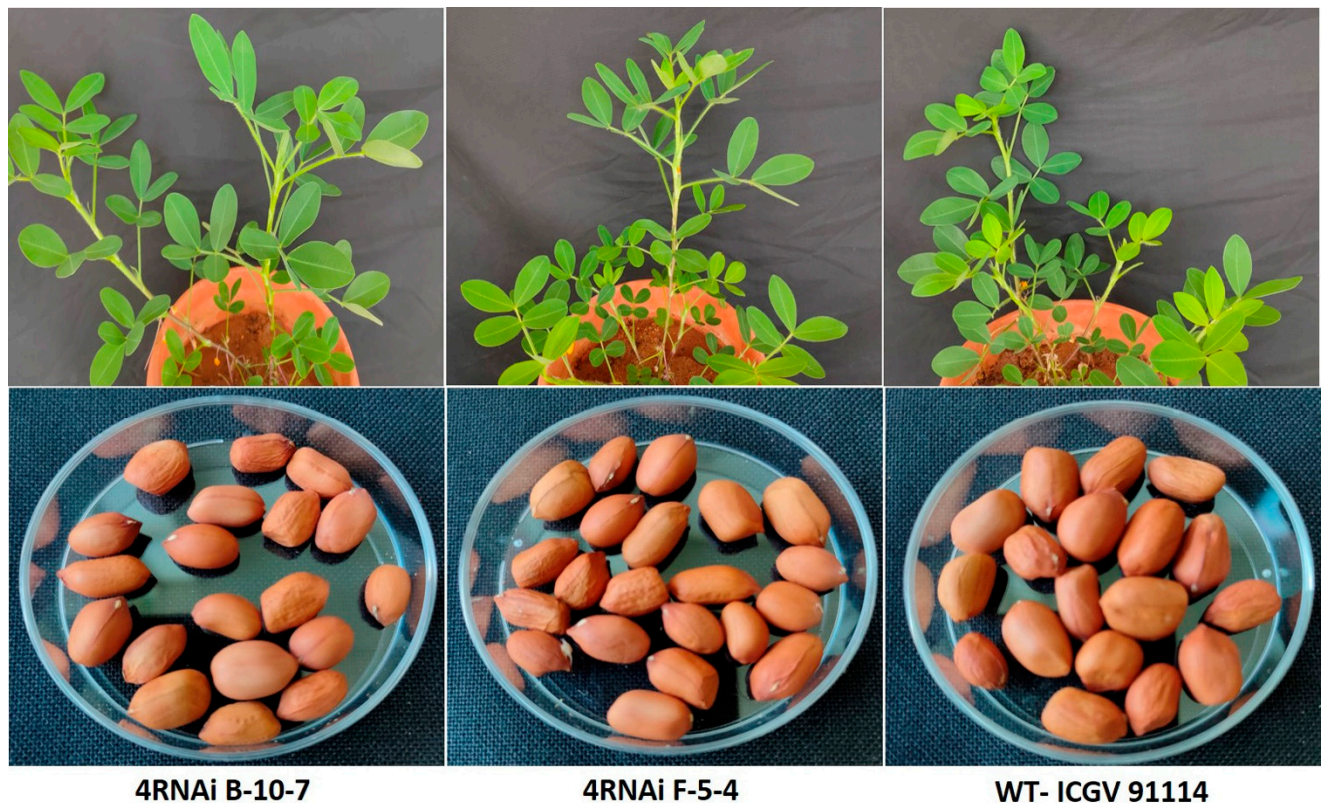

**Figure S1:** Phenotypic assessment of groundnut HIGS lines in T<sub>3</sub> generation and wild type control ICGV 91114

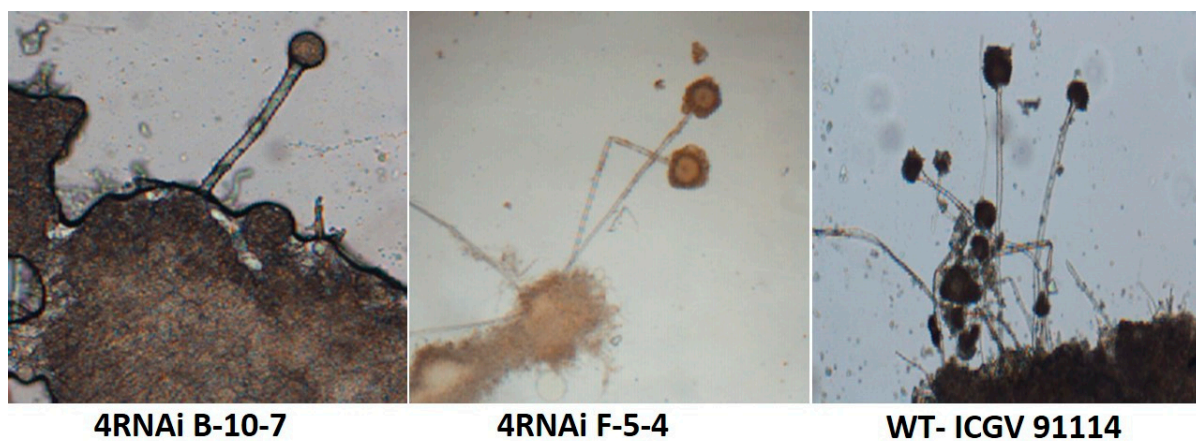

**Figure S2:** Microscopic observation of *A. flavus* growth inhibition in HIGS lines and susceptible wild type control

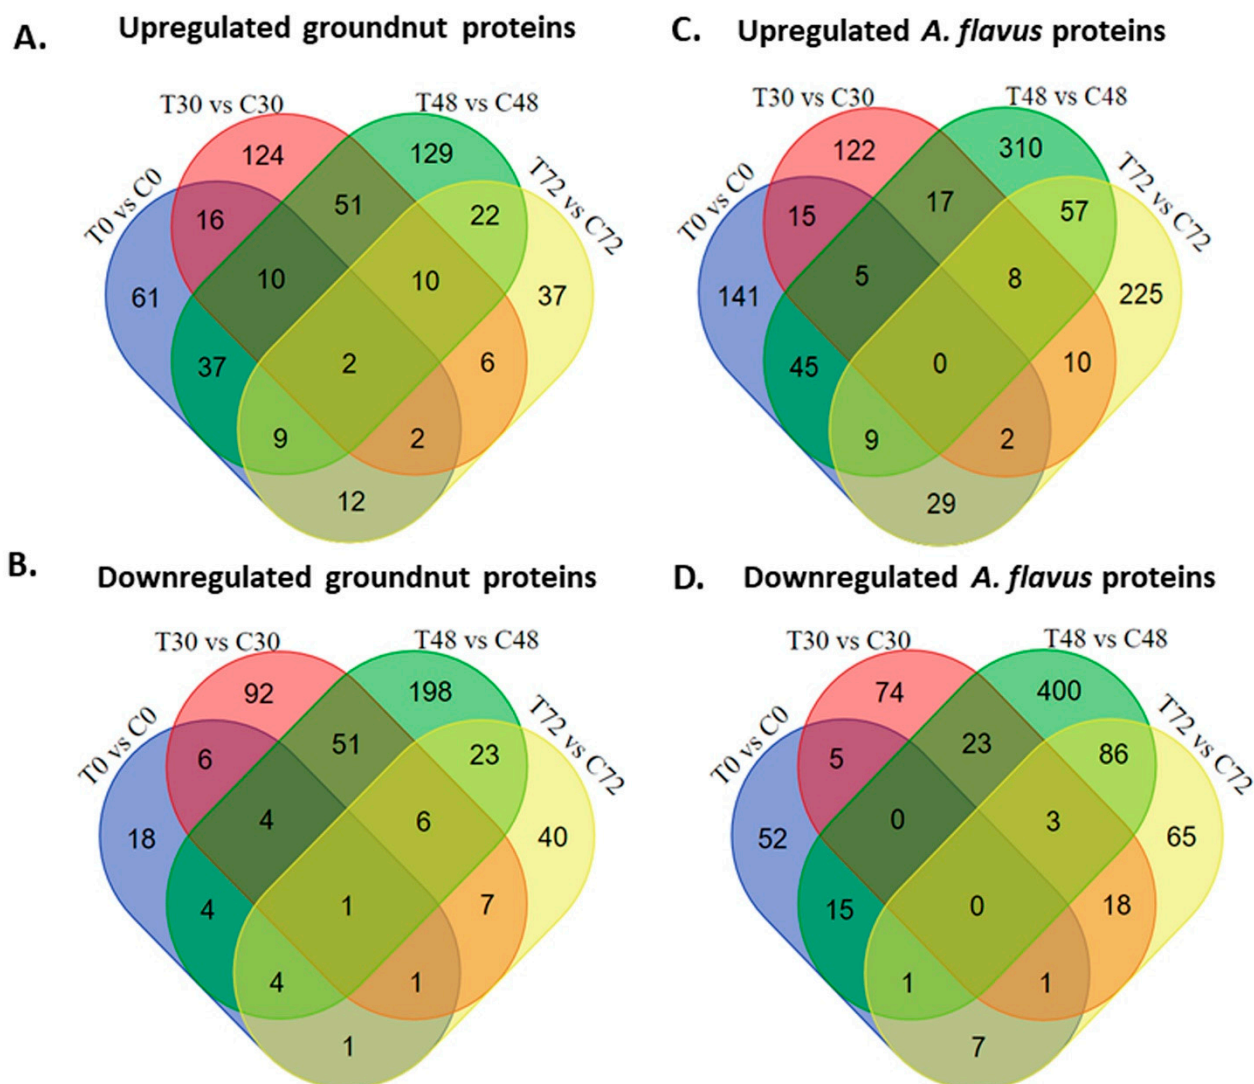

**Figure S3:** Venn diagram showing significantly differentially expressed groundnut and *A. flavus* proteins during infection at 0, 30, 48 and 72 hpi. (A) Upregulated groundnut proteins between 4RNAi and WT controls; (B) Downregulated groundnut proteins between 4RNAi and WT controls; (C) Upregulated *A. flavus* proteins between treatments 4RNAi and WT controls; (D) Downregulated *A. flavus* proteins between 4RNAi and WT controls.



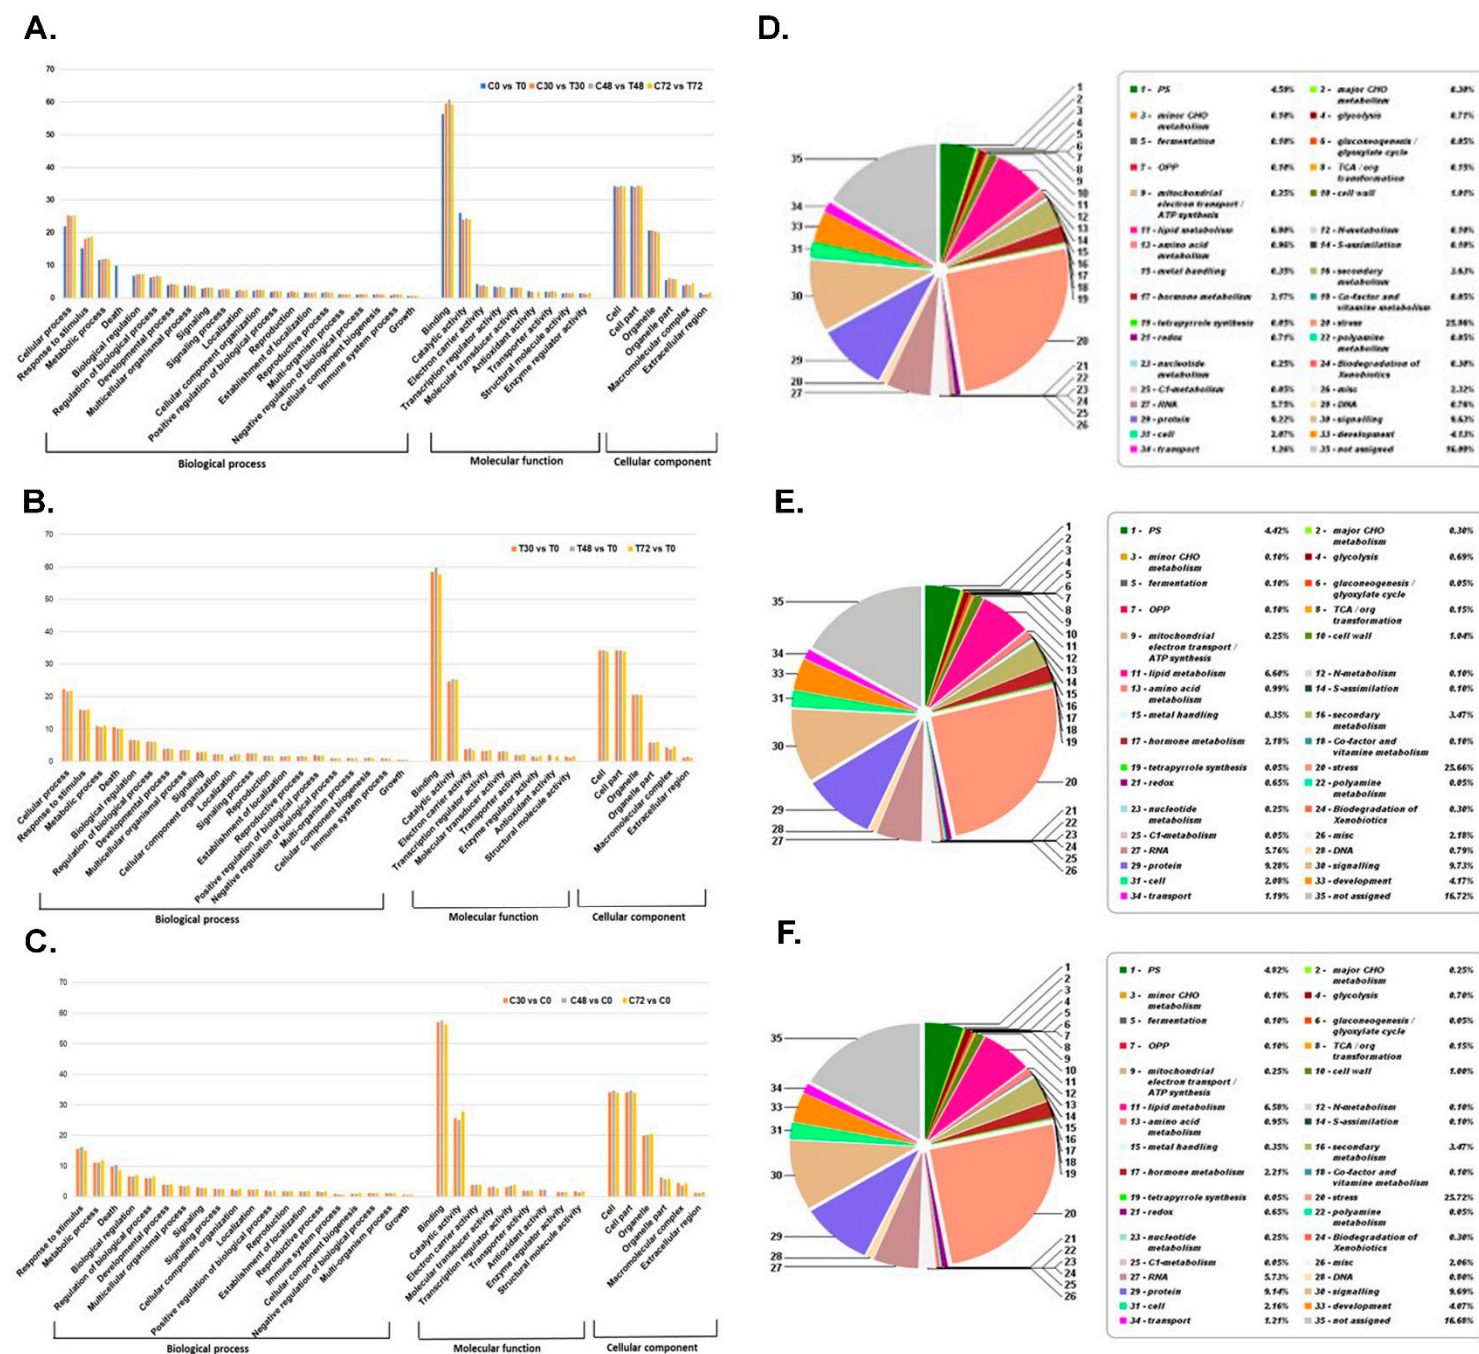

Supplement: s1 [file s1]
