# Supplementary material for: Multiplexed Host-Induced Gene Silencing of Aspergillus flavus Genes Confers Aflatoxin Resistance in Groundnut
Source: Toxins (Basel). 2023 May 5;15(5):319. doi: 10.3390/toxins15050319 (PMC10223772; doi:10.3390/toxins15050319)
Supplement: Supplementary file 1 [file toxins-15-00319-s001.zip › Supplementary Tables S1-S10.xlsx]

## Sheet: Table S1
Table S1. List of primers used in this study					Annealing temperature (˚C)	Product size (bp)
GenBank ID	Gene name	Gene name	Primer name	Sequence (5'-3')
A. Primers used for expression analysis
AAIH03000181.1	nsdC	nsdC	FP	GCCAGACTTGCCAATCAC	60	153
			RP	CATCCACCTTGCCCTTTA
CP059860.1	Ver1/aflM	Ver1/aflM	FP	CTCGCTTGCATCGTTGAGTA	60	153
			RP	GCCTGAGAATCTTTGCTTGG
XM_041294274.1	Vea	Vea	FP	TCTTCTGACCGAATCTCTACCC	60	162
			RP	TGCACCCTGGAAACCATACT
XM_041285628.1	alfR	alfR	FP	CCGGGATAGCTGTACGAGTT	60	168
			RP	GATGGTCGCCGAGTTGAATC
XM_015546911.1	aflQ	aflQ	FP	AGGCAAGCATGGAAGATG	60	131
			RP	GTCCGGGTTATCTAAAGTCCTC
AF169016	aflV	aflV	FP	CGATTCGTGGCATTGTTG	60	112
			RP	TTTGCACACAGTCTCGTTGG
AF169016	aflW	aflW	FP	CGTGGTGCAGTGGATTAAGA	60	160
			RP	ACCCGTCTCGTTGTTCTTGT
AY510455	ordB/aflX	ordB/aflX	FP	AGGTTTGACGAAGGTTGTGG	60	216
			RP	GCACTGAAAAAGCTCCAAGC
AF002660	aflS	aflS	FP	AACAGTTCGTGACCCAACCA	60	175
			RP	AAGACATGCGGCAAAAGGAG
AF417002	aflJ	aflJ	FP	ATAAAGTCAGCGGCGTGGTG	60	307
			RP	ATGACCGGCACCTTAGCAGT
AF106958	aflL	aflL	FP	CAACTTTACTCACGCCGACA	60	131
			RP	GATTGCGCCCAATACAGTTC
L25834	aflP	aflP	FP	CACTCGACACAATCGTCACC	60	109
			RP	TATTGATCAGGGGCAACCTC
AF391094	aflB	aflB	FP	TCAAGCCCGTACCATTCATC	60	100
			RP	TCCAATTACCGCCTCCACAT
L27801	aflD	aflD	FP	GTGGTGGTTGCCAATGCG	60	116
			RP	CTGAAACAGTAGGACGGGAGC
AB022905	aflO	aflO	FP	GATTGGGATGTGGTCATGCGATT	60	181
			RP	GCCTGGGTCCGAAGAATGC
XM_025765230.2	CDP-diacylglycerol-glycerol-3-phosphate 3-phosphatidyltransferase	CDP-diacylglycerol-glycerol-3-phosphate 3-phosphatidyltransferase	FP	TCTACGTCCGCACAACCGCAT	60	120
			RP	TGCGCCCAGTGCGTTGATGA
KF437909	CDPK	Calcium-dependent protein kinase	FP	TGTGCATTGTGCATAGCCAG	60	108
			RP	GGGTGTGGTTAAAGCGAGGA
EU331152	CAD	Cinnamyl alcohol dehydrogenase	FP	GCCATTCCGATCTCCACCAA	60	103
			RP	TTGGAGCCAACCTCGAGAAC
EF371920	C4H	Cinnamic acid 4-hydroxylase	FP	ACCAGGCCACCAAGTAACAG	60	124
			RP	GTCGTGGAGGTTCATGTGTG
AFP33452.1	CFI	Chalcone-flavonone isomerase family protein	FP	CGGAACTGCAGTGATTGAGA	60	107
			RP	ATCTGGTGGCCAAACTCTGT
M37637.1	PNC	Cationic peroxidase 2	FP	AGCCAAGGGACTCAACACAC	60	171
			RP	TGAGGGCACAGTGCTTGTAG
H9L792	H9L7	CDP-diacylglycerol-glycerol-3-phosphate 3-phosphatidyltransferase	FP	TCTACGTCCGCACAACCGCAT	60	120
			RP	TGCGCCCAGTGCGTTGATGA
KF312219	DFR	Dihydroflavonol-4-reductase	FP	GCTGAAGGAGGATGGAAGTG	60	128
			RP	GCCTCTCAGCCAGTGTCTTC
KC160500	PAAT	1-acylglycerol-3-phosphate O-acyltransferase	FP	CCAGAAGGCACCGATTTTAC	60	114
			RP	GCAGAAGCCCTTTGTCTTTG
KF358457	SLD	Sphingolipid delta8 desaturase	FP	CCCACTCCTTGTTTCATGCT	60	174
			RP	GTCCCACTCGTCTGCTTCTC
KF431828	Calmodulin	Calmodulin	FP	TCCCTGAATTCCTCAACCTG	60	177
			RP	TCTCGTCAACCTCCTCGTCT
XM_025845585	Annexin5	Annexin5	FP	GACGCCATGCAACTTTACCG	60	106
			RP	GTTGGATGTAGGCTCGCTGT
XM_025832761	Syntaxin 52	Syntaxin 52	FP	CGTATCCTTCACCCTCCATCG	60	150
			RP	TCGGCGAGTTTCACTGCTTC
EG030635	Glucose-6-phospahate 1- dehydrogenase	Glucose-6-phospahate 1- dehydrogenase	FP	ACCATTCCAGAGGCTTATGAGC	60	151
			RP	AAGGGAGTGACTTGAACTCTCC
EG529529	Alcohol dehydrogenase	Alcohol dehydrogenase	FP	GCTTCAAGAGCAGGTCACAAGT	60	143
			RP	GAGACATCCTCCTTCGTGCATA
B. Primers used for genotyping
	4RNAi	4RNAi	FP	CGCCTGGAATGAATACCTCA	60	820
			RP	AGACAGCCACTGGACACG
	4RNAi2	4RNAi2	FP	CTTCCAGGACCACATGACTC	60	508
			RP	GCTCAGCAAGTAGCCATCCT
AJ311872.1	PdK	PdK	FP	GACAAGTGATGTGTAAGACGAAG	60	560
			RP	GTTACCTTGTTTATTCATGTTCGAC
EG529529	Alcohol dehydrogenase	Alcohol dehydrogenase	FP	GCTTCAAGAGCAGGTCACAAGT	60	143
			RP	GAGACATCCTCCTTCGTGCATA
C. Primers used for fungal load
FLAV	ITS2	ITS2	FP	GTCGTCCCCTCTCCGG	60	100
			RP	CTGGAAAAAGATTGATTTGCG
CP044619.1	β-tubulin	β-tubulin	FP	GCCGCTTTTTGACTTGCTCC	60	231
			RP	ACTGATTGCCGATACGCTGG
D. Primers used for copy number estimation
107638771	GnVP	GnVP	FP	ACACCTACAGTTGTCCCAGCTT	60	147
			RP	CTAGGAACCGCTTGAACCCTGT	60
XM_041285628.1	aflR	aflR	FP	GAAGATCCTCGGGTGTTCGT	60	152
			RP	TACAGCTGCCACTGTTGGTT	60
*A. flavus primers ITS2 region described in Sardinas etal 2011
4RNAi primers used for PCR and 4RNAi2 primers used for RT-PCR

## Sheet: Table S2
Table S2. Copy number of aflR gene in groundnut HIGS lines estimated by qPCR assay.
Event#	Transgene	Estimated gene copy number
4RNAi B-10-7-10	aflR	1
4RNAi B-10-9-11	aflR	1
4RNAi B-10-12-1	aflR	1
4RNAi B-10-12-7	aflR	1
4RNAi B-10-13-2	aflR	1
4RNAi B-10-13-4	aflR	1
4RNAi B-10-14-3	aflR	1
4RNAi F-4-14-4	aflR	1
4RNAi F-5-4-4-5	aflR	1
4RNAi F-5-7-4-5	aflR	1
4RNAi F-5-7-4-2	aflR	1

## Sheet: Table S3
Table S3. Transgene segregation in 4RNAi-HIGS lines in T1, T2 and T3 generations.
Generation	Event#	No. of plants tested	PCR positives	PCR negatives	X2 value
T1	4RNAi 14	8	5	3	0.666667
T1	4RNAi 37	9	7	2	0.037037
T1	4RNAi 44	9	7	2	0.037037
T1	4RNAi B	12	8	4	0.444444
T1	4RNAi E	7	5	2	0.047619
T1	4RNAi F	6	3	3	2
T1	4RNAi L	9	8	1	0.925926
T2	4RNAi B-1	30	20	10	1.11111
T2	4RNAi B-4	15	10	5	0.555556
T2	4RNAi B-8	6	5	1	0.222222
T2	4RNAi B-10	16	10	6	1.33333
T2	4RNAi B-12	14	9	5	0.857143
T2	4RNAi E-2	16	9	7	3
T2	4RNAi E-5	23	15	8	1.17391
T2	4RNAi E-7	21	14	7	0.777778
T2	4RNAi F-4	20	15	5	0
T2	4RNAi F-5	28	18	10	1.71429
T3	4RNAi B-10-7	12	7	5	1.77778
T3	4RNAi B-10-8	14	8	6	2.38095
T3	4RNAi B-10-9	18	12	6	0.666667
T3	4RNAi F-4-14	15	8	7	3.75556
T3	4RNAi F-5-4	6	6	0	2
T3	4RNAi F-5-5	12	7	5	1.77778
T3	4RNAi F-5-7	18	10	8	3.62963

## Sheet: Table S4
Table S4. Sequence predicted siRNAs with 4RNAi-HIGS construct using pssRNAit
siRNA_(anti-sense)	siRNA_(Sense)
UGUUGAACUACCUUCUCCGCG	CGGAGAAGGUAGUUCAACAGA
UUGACAUCCGUGAUGGCGGAU	CCGCCAUCACGGAUGUCAACG
UAUGCGUUCGGAUCGGACGAG	CGUCCGAUCCGAACGCAUAUC
UCUUGGGAUAGCUGGAACGUU	CGUUCCAGCUAUCCCAAGAAU
UUGCACAGAGCCCUGAGGGUG	CCCUCAGGGCUCUGUGCAACC
UUGUAAAGCGAGAAUCUGAGG	UCAGAUUCUCGCUUUACAAUU
UUCCGGACCGCAUCGGUUCGA	GAACCGAUGCGGUCCGGAAGA
AACGUUCCGUUGACAUCCGUG	CGGAUGUCAACGGAACGUUCC
GAACGUUCCGUUGACAUCCGU	GGAUGUCAACGGAACGUUCCA
AUGGUUGCUAGAAUGGCUGUG	CAGCCAUUCUAGCAACCAUAA
AUGAUAUGCGUUCGGAUCGGA	CGAUCCGAACGCAUAUCAUUC
AUGGCGGAUAGGAGUAACCGG	GGUUACUCCUAUCCGCCAUCA
UCAGCAAGUAGCCAUCCUGCG	CAGGAUGGCUACUUGCUGAGC
UAUGUUUCGUAGCGGCCGGUG	CCGGCCGCUACGAAACAUACC
UGGCGGAUAGGAGUAACCGGG	CGGUUACUCCUAUCCGCCAUC
UAGCCAUCCUGCGCGCACGAA	CGUGCGCGCAGGAUGGCUACU
AUAUUUAGUGGCUUAGGCGGU	CGCCUAAGCCACUAAAUAUGC
AAUGAUAUGCGUUCGGAUCGG	GAUCCGAACGCAUAUCAUUCC
UAUGGUUGCUAGAAUGGCUGU	AGCCAUUCUAGCAACCAUAAC
AUUGCGAUAGCGUCGGUGCCG	GCACCGACGCUAUCGCAAUCC
UACUCGGCGCUCGAUUCUGAU	CAGAAUCGAGCGCCGAGUAUG
UCGAUGACACAAUGUCCAGGU	CUGGACAUUGUGUCAUCGAAC
UGGUGGUUGCACAGAGCCCUG	GGGCUCUGUGCAACCACCACC
AUAGCUGGAACGUUCCGUUGA	AACGGAACGUUCCAGCUAUCC
UAACCGGGCGUUUCAUACUCG	AGUAUGAAACGCCCGGUUACU
UCGGCGCUCGAUUCUGAUCAG	GAUCAGAAUCGAGCGCCGAGU
AUCUUCCGGACCGCAUCGGUU	CCGAUGCGGUCCGGAAGAUCC
AUAUGCGUUCGGAUCGGACGA	GUCCGAUCCGAACGCAUAUCA
UAAUUGGAGUCAUGUGGUCCU	GACCACAUGACUCCAAUUAUG
AUGCCCAUUAUUAUUUGCGGU	CGCAAAUAAUAAUGGGCAUCU
UGCGAUAGCGUCGGUGCCGUU	CGGCACCGACGCUAUCGCAAU
UUCCGUUGACAUCCGUGAUGG	AUCACGGAUGUCAACGGAACG
AACGAUAAGGACGACCAUGCU	CAUGGUCGUCCUUAUCGUUCU
AACACCCGAGGAUCUUCCGGA	CGGAAGAUCCUCGGGUGUUCG
UCGGUUCGAUGACACAAUGUC	CAUUGUGUCAUCGAACCGAUG
UGACACAAUGUCCAGGUAGCC	CUACCUGGACAUUGUGUCAUC
AGCAUAAUUGGAGUCAUGUGG	ACAUGACUCCAAUUAUGCUGA
UUCGGAUCGGACGAGCGUGGC	CACGCUCGUCCGAUCCGAACG
UGCUCAGCAAGUAGCCAUCCU	GAUGGCUACUUGCUGAGCAUG
AAGGACGACCAUGCUCAGCAA	GCUGAGCAUGGUCGUCCUUAU
CAUAAUUGGAGUCAUGUGGUC	CCACAUGACUCCAAUUAUGCU
CAAGUAGCCAUCCUGCGCGCA	CGCGCAGGAUGGCUACUUGCU
UCGGCCUGGAUUGCGAUAGCG	CUAUCGCAAUCCAGGCCGAUG
AGGAUCCCCGACAUCGGCCUG	GGCCGAUGUCGGGGAUCCUGA
ACGAUAAGGACGACCAUGCUC	GCAUGGUCGUCCUUAUCGUUC
UCAUACUCGGCGCUCGAUUCU	AAUCGAGCGCCGAGUAUGAAA
UCGGAUCGGACGAGCGUGGCU	CCACGCUCGUCCGAUCCGAAC
AGCAAGUAGCCAUCCUGCGCG	CGCAGGAUGGCUACUUGCUGA
UAGCCAAAAUGGCGCACCGUC	CGGUGCGCCAUUUUGGCUACC
GUAUGUUUCGUAGCGGCCGGU	CGGCCGCUACGAAACAUACCC
UGAGCCACGGAAUGAUAUGCG	CAUAUCAUUCCGUGGCUCAAU
UUUCGUAGCGGCCGGUGGUGG	ACCACCGGCCGCUACGAAACA
AUAAUUGGAGUCAUGUGGUCC	ACCACAUGACUCCAAUUAUGC
GAUAGCUGGAACGUUCCGUUG	ACGGAACGUUCCAGCUAUCCC
UGUUUCGUAGCGGCCGGUGGU	CACCGGCCGCUACGAAACAUA
AGCCACGGAAUGAUAUGCGUU	CGCAUAUCAUUCCGUGGCUCA
GAUGACACAAUGUCCAGGUAG	ACCUGGACAUUGUGUCAUCGA
CAUAUUUAGUGGCUUAGGCGG	GCCUAAGCCACUAAAUAUGCC
UCAGCAUAAUUGGAGUCAUGU	AUGACUCCAAUUAUGCUGAUC
UUCCAAGCGGAGCGGAGGCAA	GCCUCCGCUCCGCUUGGAACC
ACACAAUGUCCAGGUAGCCAA	GGCUACCUGGACAUUGUGUCA
UGAUAUGCGUUCGGAUCGGAC	CCGAUCCGAACGCAUAUCAUU
UUCUCCGCGGCCUCCCGGGAG	CCCGGGAGGCCGCGGAGAAGG
GAUAAGGACGACCAUGCUCAG	GAGCAUGGUCGUCCUUAUCGU
AGCCAUUCUUGGGAUAGCUGG	AGCUAUCCCAAGAAUGGCUUG
GUUGACAUCCGUGAUGGCGGA	CGCCAUCACGGAUGUCAACGG
GUAAAGCGAGAAUCUGAGGUA	CCUCAGAUUCUCGCUUUACAA
UCUCCACCCGCCGCCGUUGAG	CAACGGCGGCGGGUGGAGAAA
UGUCCAGGUAGCCAAAAUGGC	CAUUUUGGCUACCUGGACAUU
GUUGAACUACCUUCUCCGCGG	GCGGAGAAGGUAGUUCAACAG
AUCCGUGAUGGCGGAUAGGAG	CCUAUCCGCCAUCACGGAUGU
UAGGCGGUUCCAAGCGGAGCG	CUCCGCUUGGAACCGCCUAAG
UCACCUCCGGACCUGGUUUGG	AAACCAGGUCCGGAGGUGACC
UUCGUAGCGGCCGGUGGUGGU	CACCACCGGCCGCUACGAAAC
GUUGCUAGAAUGGCUGUGGGA	CCACAGCCAUUCUAGCAACCA
UAAGGACGACCAUGCUCAGCA	CUGAGCAUGGUCGUCCUUAUC
ACGGAAUGAUAUGCGUUCGGA	CGAACGCAUAUCAUUCCGUGG
UCGUAGCGGCCGGUGGUGGUU	CCACCACCGGCCGCUACGAAA
AUAGCGUCGGUGCCGUUGGCC	CCAACGGCACCGACGCUAUCG
AUGUGGUCCUGGAAGAUGCCC	GCAUCUUCCAGGACCACAUGA
UGGCUUAGGCGGUUCCAAGCG	CUUGGAACCGCCUAAGCCACU
UGCCGUUGGCCUUGAUCUGUU	CAGAUCAAGGCCAACGGCACC
UUCUCCACCCGCCGCCGUUGA	AACGGCGGCGGGUGGAGAAAC
UCGGACGAGCGUGGCUCGCCG	GCGAGCCACGCUCGUCCGAUC
UAGCGGCCGGUGGUGGUUGCA	CAACCACCACCGGCCGCUACG
UCCGGACCGCAUCGGUUCGAU	CGAACCGAUGCGGUCCGGAAG
ACGACCAUGCUCAGCAAGUAG	ACUUGCUGAGCAUGGUCGUCC
UCCAGGUAGCCAAAAUGGCGC	GCCAUUUUGGCUACCUGGACA
AUGCCAGCACCUUGAGAACGA	GUUCUCAAGGUGCUGGCAUGG
AGCGUCGGUGCCGUUGGCCUU	GGCCAACGGCACCGACGCUAU
CGAUGACACAAUGUCCAGGUA	CCUGGACAUUGUGUCAUCGAA
UGUGGUCCUGGAAGAUGCCCA	GGCAUCUUCCAGGACCACAUG
GUGGUGGUUGCACAGAGCCCU	GGCUCUGUGCAACCACCACCG
UGCCCAUUAUUAUUUGCGGUC	CCGCAAAUAAUAAUGGGCAUC
AGGCGGUUCCAAGCGGAGCGG	GCUCCGCUUGGAACCGCCUAA
AAGUAGCCAUCCUGCGCGCAC	GCGCGCAGGAUGGCUACUUGC
GUUUCAUACUCGGCGCUCGAU	CGAGCGCCGAGUAUGAAACGC
UGGAACGUUCCGUUGACAUCC	AUGUCAACGGAACGUUCCAGC
UAGCGUCGGUGCCGUUGGCCU	GCCAACGGCACCGACGCUAUC
UCAGGAUCCCCGACAUCGGCC	CCGAUGUCGGGGAUCCUGAGG
AUGUUUCGUAGCGGCCGGUGG	ACCGGCCGCUACGAAACAUAC
CGUUCGGAUCGGACGAGCGUG	CGCUCGUCCGAUCCGAACGCA
AACUACCUUCUCCGCGGCCUC	GGCCGCGGAGAAGGUAGUUCA
UUGGGAUAGCUGGAACGUUCC	AACGUUCCAGCUAUCCCAAGA
ACACCCGAGGAUCUUCCGGAC	CCGGAAGAUCCUCGGGUGUUC
UGCCGCCGAUUGAGCCACGGA	CGUGGCUCAAUCGGCGGCACC
UGGUUGCUAGAAUGGCUGUGG	ACAGCCAUUCUAGCAACCAUA
UAGGAGUAACCGGGCGUUUCA	AAACGCCCGGUUACUCCUAUC
UCGCCUCAGGAUCCCCGACAU	GUCGGGGAUCCUGAGGCGACG
UCUUCCGGACCGCAUCGGUUC	ACCGAUGCGGUCCGGAAGAUC
UUAGGCGGUUCCAAGCGGAGC	UCCGCUUGGAACCGCCUAAGC
CCAUGCUCAGCAAGUAGCCAU	GGCUACUUGCUGAGCAUGGUC
AAGAUGCCCAUUAUUAUUUGC	AAAUAAUAAUGGGCAUCUUCC
GUUUCGUAGCGGCCGGUGGUG	CCACCGGCCGCUACGAAACAU
CUCAGGAUCCCCGACAUCGGC	CGAUGUCGGGGAUCCUGAGGC
GACAUCGGCCUGGAUUGCGAU	CGCAAUCCAGGCCGAUGUCGG
UCCGUGAUGGCGGAUAGGAGU	UCCUAUCCGCCAUCACGGAUG
GAGCCACGGAAUGAUAUGCGU	GCAUAUCAUUCCGUGGCUCAA
GUGGUUGCACAGAGCCCUGAG	CAGGGCUCUGUGCAACCACCA
ACGUUCCGUUGACAUCCGUGA	ACGGAUGUCAACGGAACGUUC
UGGGUGCCUGCUGCCGCAGCA	CUGCGGCAGCAGGCACCCAGU
AAUGGCUGUGGGAUGGGGUAU	ACCCCAUCCCACAGCCAUUCU
UGCGUUCGGAUCGGACGAGCG	CUCGUCCGAUCCGAACGCAUA
UGGCAUAUUUAGUGGCUUAGG	UAAGCCACUAAAUAUGCCAUC
UCCGGACCUGGUUUGGACGCC	CGUCCAAACCAGGUCCGGAGG
GCGGAUAGGAGUAACCGGGCG	CCCGGUUACUCCUAUCCGCCA
UUCAUACUCGGCGCUCGAUUC	AUCGAGCGCCGAGUAUGAAAC
CGGAUAGGAGUAACCGGGCGU	GCCCGGUUACUCCUAUCCGCC
GACACAAUGUCCAGGUAGCCA	GCUACCUGGACAUUGUGUCAU
GUAGCCAUCCUGCGCGCACGA	GUGCGCGCAGGAUGGCUACUU
GUUUGGACGCCAGAGGCCCGU	GGGCCUCUGGCGUCCAAACCA
GUCCAGGUAGCCAAAAUGGCG	CCAUUUUGGCUACCUGGACAU
GGAACGUUCCGUUGACAUCCG	GAUGUCAACGGAACGUUCCAG
UGCUAGAAUGGCUGUGGGAUG	UCCCACAGCCAUUCUAGCAAC
GCAAGUAGCCAUCCUGCGCGC	GCGCAGGAUGGCUACUUGCUG
GUUGCACAGAGCCCUGAGGGU	CCUCAGGGCUCUGUGCAACCA
AGAAUGGCUGUGGGAUGGGGU	CCCAUCCCACAGCCAUUCUAG
UCACCAAGGGCGACGGCGAUG	UCGCCGUCGCCCUUGGUGAGC
UGCUGCCGCAGCAUACCAUGC	AUGGUAUGCUGCGGCAGCAGG
GGUAUGUUUCGUAGCGGCCGG	GGCCGCUACGAAACAUACCCC
CUUAGGCGGUUCCAAGCGGAG	CCGCUUGGAACCGCCUAAGCC
GUGCCGCCGAUUGAGCCACGG	GUGGCUCAAUCGGCGGCACCC
CCUGGAUUGCGAUAGCGUCGG	GACGCUAUCGCAAUCCAGGCC
CCGAGGAUCUUCCGGACCGCA	CGGUCCGGAAGAUCCUCGGGU
UGCACAGAGCCCUGAGGGUGA	ACCCUCAGGGCUCUGUGCAAC
GAUAGCGUCGGUGCCGUUGGC	CAACGGCACCGACGCUAUCGC
GGUGGUUGCACAGAGCCCUGA	AGGGCUCUGUGCAACCACCAC
GCAUAUUUAGUGGCUUAGGCG	CCUAAGCCACUAAAUAUGCCA
UGACAUCCGUGAUGGCGGAUA	UCCGCCAUCACGGAUGUCAAC
GAGGCAAGCCAUUCUUGGGAU	CCCAAGAAUGGCUUGCCUCCG
AGAUGCCCAUUAUUAUUUGCG	CAAAUAAUAAUGGGCAUCUUC
GUUCGGAUCGGACGAGCGUGG	ACGCUCGUCCGAUCCGAACGC
CUUCCGGACCGCAUCGGUUCG	AACCGAUGCGGUCCGGAAGAU
GUGGUCCUGGAAGAUGCCCAU	GGGCAUCUUCCAGGACCACAU
GUAACCGGGCGUUUCAUACUC	GUAUGAAACGCCCGGUUACUC
GGUGCCGUUGGCCUUGAUCUG	GAUCAAGGCCAACGGCACCGA
GGGCGUUUCAUACUCGGCGCU	CGCCGAGUAUGAAACGCCCGG
CGGAAUGAUAUGCGUUCGGAU	CCGAACGCAUAUCAUUCCGUG
GAUGCCCAUUAUUAUUUGCGG	GCAAAUAAUAAUGGGCAUCUU
GAUUGCGAUAGCGUCGGUGCC	CACCGACGCUAUCGCAAUCCA
GAGCCCUGAGGGUGAAUUGUA	CAAUUCACCCUCAGGGCUCUG
GGAGGCAAGCCAUUCUUGGGA	CCAAGAAUGGCUUGCCUCCGC
GUCACCUCCGGACCUGGUUUG	AACCAGGUCCGGAGGUGACCG
CUCACCAAGGGCGACGGCGAU	CGCCGUCGCCCUUGGUGAGCG
ACUACCUUCUCCGCGGCCUCC	AGGCCGCGGAGAAGGUAGUUC
GCUUAGGCGGUUCCAAGCGGA	CGCUUGGAACCGCCUAAGCCA
CCAGGUAGCCAAAAUGGCGCA	CGCCAUUUUGGCUACCUGGAC
CGAGGAUCUUCCGGACCGCAU	GCGGUCCGGAAGAUCCUCGGG
AGAGGCCCGUUAUGGUUGCUA	GCAACCAUAACGGGCCUCUGG
GAUGGCGGAUAGGAGUAACCG	GUUACUCCUAUCCGCCAUCAC
UCCACCCGCCGCCGUUGAGGU	CUCAACGGCGGCGGGUGGAGA
UCCAAGCGGAGCGGAGGCAAG	UGCCUCCGCUCCGCUUGGAAC
CAGAGGCCCGUUAUGGUUGCU	CAACCAUAACGGGCCUCUGGC
CUUGGGAUAGCUGGAACGUUC	ACGUUCCAGCUAUCCCAAGAA
AUCGGACGAGCGUGGCUCGCC	CGAGCCACGCUCGUCCGAUCC
CUUCUCCGCGGCCUCCCGGGA	CCGGGAGGCCGCGGAGAAGGU
GACGACCAUGCUCAGCAAGUA	CUUGCUGAGCAUGGUCGUCCU
GCGUUCGGAUCGGACGAGCGU	GCUCGUCCGAUCCGAACGCAU
GUUCCAAGCGGAGCGGAGGCA	CCUCCGCUCCGCUUGGAACCG
GGCUUAGGCGGUUCCAAGCGG	GCUUGGAACCGCCUAAGCCAC
AGCGUGGCUCGCCGGAUGGCA	CCAUCCGGCGAGCCACGCUCG
GACGAGCGUGGCUCGCCGGAU	CCGGCGAGCCACGCUCGUCCG
AGCGAGAAUCUGAGGUAUUCA	AAUACCUCAGAUUCUCGCUUU
CAGGAUCCCCGACAUCGGCCU	GCCGAUGUCGGGGAUCCUGAG
UGGACGCCAGAGGCCCGUUAU	AACGGGCCUCUGGCGUCCAAA

## Sheet: Table S5
Table S5. Number of off-targets identified with 4RNAi-HIGS construct
Gene	siRNA size (bp)	Number of siRNAs generated
		Groundnut			A. flavus
		Targets	All hits	Efficient hits	Targets	All hits	Efficient hits
4RNAi (820 bp)	21	0	0	0	Nsdc	192	93
					aflR	180	86
					Vea	180	88
					Ver1	72	38
NsdC (200 bp)	21	0	0	0	Nsdc	190	91
Vea (200 bp)	21	0	0	0	Vea	179	88
Ver1 (210 bp)	21	0	0	0	Ver1	72	38
aflR (210 bp)	21	0	0	0	aflR	180	86

## Sheet: Table S6
Table S6. "si-Fi" predictions of nsdC, veA, ver1, & aflR Aspergillus flavus sequence
Sequence	Id	All Hits	Efficient Hits
nsdC	EED50371	190	42
veA	EED49824	179	13
ver1	EED51165	190	3
aflR	EED51170	180	5
X-axis = Query sequence coordinates
Y-axis = Number of siRNA with hits to the subject
Blue line: Total no. of siRNA hits
Red line: Efficient hits

## Sheet: Table S7
Table S7. Proteins up-regulated in A. flavus infected 4RNAi-HIGS lines expressing nsdC, veA, aflR and aflM genes
Accession	Mass	Description	Fold change over WT control				Fold change observed at different stages of infection compared to 0h			Subcellular localization
			0 h	30 h	48 h	72 h	30 h	48 h	72 h
E2EBY4	3961.16	Putative always early protein (Fragment) OS=Arachis diogoi OX=170720 PE=2 SV=1							2.12001	Nucleus
Q2PYP6	4303.78	5-hydroxytryptamine 1E receptor-like protein (Fragment) OS=Arachis hypogaea OX=3818 PE=2 SV=1			2.67019					Mitochondrion
E2EAZ6	5027.71	Uncharacterized protein (Fragment) OS=Arachis diogoi OX=170720 PE=2 SV=1		1.8417	3.25575					Chloroplast
E2EAZ6	5027.71	Uncharacterized protein (Fragment) OS=Arachis diogoi OX=170720 PE=2 SV=1							15.8263	Chloroplast
E2EBZ0	5528.32	Uncharacterized protein (Fragment) OS=Arachis diogoi OX=170720 PE=2 SV=1					5.22612			Nucleus
N1NEY9	6076.7	Uncharacterized protein OS=Arachis hypogaea OX=3818 GN=ARAX_AHF417E07-005 PE=4 SV=1		11.0047						Chloroplast
E2EAJ3	6089.76	Uncharacterized protein (Fragment) OS=Arachis diogoi OX=170720 PE=2 SV=1					4.14268			Nucleus
B4UWE5	6157.08	Peroxisomal ascorbate peroxidase (Fragment) OS=Arachis hypogaea OX=3818 PE=2 SV=1					2.07214			Cytoplasm
Q49NL5	6683.29	Beta-tubulin (Fragment) OS=Neosartorya fumigata OX=746128 GN=ben A PE=4 SV=1							19.633	Chloroplast
B4UWD0	6790.92	Short-chain dehydrogenase/reductase SDR (Fragment) OS=Arachis hypogaea OX=3818 PE=2 SV=1					5.42979			Mitochondrion
H6U5A5	6912.35	Mismatched base pair and cruciform DNA recognition protein (Fragment) OS=Aspergillus flavus OX=5059 PE=2 SV=1						6.50536		Nucleus
Q5QEU1	6948.03	Uncharacterized protein (Fragment) OS=Arachis hypogaea OX=3818 PE=2 SV=1							4.1796	Nucleus
E5FHY8	6978.65	Late embryogenesis abundant protein group 3 protein OS=Arachis hypogaea OX=3818 GN=LEA3-7 PE=2 SV=1				5.72977		3.8426		Nucleus
G0Y6W6	7060.74	Uncharacterized protein OS=Arachis hypogaea OX=3818 GN=205D04_16 PE=4 SV=1						17.2132		Nucleus
Q850G3	7091.54	Putative cold stress responsive protein (Fragment) OS=Arachis hypogaea OX=3818 GN=Gsi-83 PE=2 SV=1		3.9074			5.02378	4.70645	3.85479	Nucleus
A0A1L7B5M3	7127.03	60S ribosomal protein L29 OS=Arachis hypogaea OX=3818 PE=2 SV=1			1.54502					Cytoplasm
D8KZF0	7184.25	Chlorophyll a-b binding protein_ chloroplastic (Fragment) OS=Arachis diogoi OX=170720 PE=2 SV=1			15.4582	21.7398				Chloroplast
A0A1B1XWN6	7309.18	WUSCHEL-related homeobox 5 (Fragment) OS=Arachis hypogaea OX=3818 GN=WOX5 PE=2 SV=1							3.97994	Nucleus
B4UWD3	7431.36	Putative mitochondrial ATP synthase (Fragment) OS=Arachis hypogaea OX=3818 PE=2 SV=1							25.5266	Mitochondrion
E2DTW7	7535.31	Putative late embryogenesis abundant protein (Fragment) OS=Arachis diogoi OX=170720 PE=2 SV=1					17.1274			Nucleus
Q0Q0R0	7569.95	Type 3 metallothionein OS=Arachis hypogaea OX=3818 GN=MT3a PE=2 SV=1					6.13157			Chloroplast
M4QEM5;A0A290G0C9	7761.91	Receptor-like protein kinase 1 (Fragment) OS=Arachis hypogaea OX=3818 GN=RLPK1 PE=2 SV=1						175.882		Cytoplasm
A0A191UJ87	7994.18	50S ribosomal protein L33_ chloroplastic OS=Arachis hypogaea OX=3818 GN=rpl33 PE=3 SV=1					2.01917			Cytoplasm
Q5QEU0	8002.85	Auxin-induced putative tetratricopeptide-containing protein (Fragment) OS=Arachis hypogaea OX=3818 PE=2 SV=1						24.978		Cytoplasm
Q2PXN5	8020.22	RW1-like protein (Fragment) OS=Arachis hypogaea OX=3818 PE=2 SV=1		3.9697			2.4676	20.7459		Mitochondrion
Q5QEU2	8306.1	Ferredoxin (Fragment) OS=Arachis hypogaea OX=3818 PE=2 SV=1	6.52604							Chloroplast
Q5QET3	8391.83	Auxin-induced putative CP12 domain-containing protein (Fragment) OS=Arachis hypogaea OX=3818 PE=2 SV=1		2.4047						Chloroplast
B3EWP3	8422.49	Defensin 1 (Fragment) OS=Arachis hypogaea OX=3818 PE=1 SV=1			16.6696					Nucleus
E2DZQ2	8440.79	Retrotransposon gag protein (Fragment) OS=Arachis diogoi OX=170720 PE=2 SV=1		2.28485				7.88614		Cell membrane
E2DZK1	8467.7	Putative ATP-dependent RNA helicase eIF4a (Fragment) OS=Arachis diogoi OX=170720 PE=2 SV=1	3.63331		7.85846		6.25277		2.33645	Cytoplasm
V5T7X7	8472.26	Putative MYB-related protein 25 OS=Arachis hypogaea OX=3818 GN=MYB25 PE=4 SV=1		5.33331						Nucleus
G0KWM3	8504.16	Putative protease (Fragment) OS=Arachis diogoi OX=170720 PE=2 SV=1					25.7444		2.58556	Nucleus
E2DNI6	8575.26	Glycine-rich protein (Fragment) OS=Arachis diogoi OX=170720 PE=2 SV=1	1.61897						6.40718	Cytoplasm
B4UW80	8587.02	Glutathione S-transferase 1 (Fragment) OS=Arachis hypogaea OX=3818 PE=2 SV=1		2.98284					50.8432	Chloroplast
Q5QET5	8779.37	Uncharacterized protein (Fragment) OS=Arachis hypogaea OX=3818 PE=2 SV=1					9.02679			Cytoplasm
B4UWA0	8860.18	Uncharacterized protein OS=Arachis hypogaea OX=3818 PE=2 SV=1					2.31137	5.34251	42.114	Nucleus
E2DEJ6	8878.35	Nucleic acid binding protein (Fragment) OS=Arachis diogoi OX=170720 PE=2 SV=1		3.14977						Cytoplasm
Q67FY4	8912.05	Defensin OS=Arachis diogoi OX=170720 PE=2 SV=1			6.01441		3.46181	9.62405		Chloroplast
E2DQY9	8917.75	Heat shock protein DnaJ (Fragment) OS=Arachis diogoi OX=170720 PE=2 SV=1							3.30648	Cytoplasm
E2EAZ7	9057.26	Protein kinase (Fragment) OS=Arachis diogoi OX=170720 PE=2 SV=1						10.2113		Cytoplasm
Q0Q0Q9	9064.67	Type 4 metallothionein OS=Arachis hypogaea OX=3818 GN=MT4a PE=2 SV=1						4.70493		Mitochondrion
G0Y6V6	9120.39	Uncharacterized protein OS=Arachis hypogaea OX=3818 GN=205D04_6 PE=4 SV=1					21.5527		20.3398	Nucleus
V5T697	9160.12	Putative MYB-related protein 26 OS=Arachis hypogaea OX=3818 GN=MYB26 PE=4 SV=1			1.85589			5.32812		Nucleus
E2DZP8	9378.39	Gag-pol polyprotein (Fragment) OS=Arachis diogoi OX=170720 PE=2 SV=1			44.162				28.1273	Cytoplasm
G0Y6U1	9414.76	Retrotransposon protein OS=Arachis hypogaea OX=3818 GN=303L13_11 PE=4 SV=1					14.5281			Chloroplast
E2DZQ3	9500.54	Uncharacterized protein (Fragment) OS=Arachis diogoi OX=170720 PE=2 SV=1			2.50461					Nucleus
B6CG41	9510.73	Non-specific lipid-transfer protein (Fragment) OS=Arachis hypogaea OX=3818 PE=2 SV=1			2.01778	3.73073		19.3874	3.70609	Chloroplast
N1NKE0	9536.6	Uncharacterized protein OS=Arachis duranensis OX=130453 GN=ARAX_ADH079023-072J06-001 PE=4 SV=1						10.862		Cytoplasm
A0A191UJB7	9551.75	Photosystem I iron-sulfur center OS=Arachis hypogaea OX=3818 GN=psaC PE=3 SV=1			7.20037	2.06232		6.4855		Cytoplasm
A0A173DXS3	9566.51	Beta-tubulin (Fragment) OS=Aspergillus chevalieri OX=182096 GN=B-tub PE=4 SV=1							326.966	Mitochondrion
A0A1B1H1W9	9610.81	WD-repeat containing protein CCS52a (Fragment) OS=Arachis hypogaea OX=3818 GN=CCS52a PE=2 SV=1					2.16515	1.72467		Chloroplast
Q2KPT8	9668.92	Resistance protein PNTR (Fragment) OS=Arachis hypogaea OX=3818 PE=4 SV=1		4.71652	1.85053			4.32294	9.56638	Vacuole
Q5QET8	9686.01	Auxin-induced putative aldo/keto reductase family protein (Fragment) OS=Arachis hypogaea OX=3818 PE=2 SV=1				4.44078		2.88297		Nucleus
B3EWP4	9704.1	Defensin 2 (Fragment) OS=Arachis hypogaea OX=3818 PE=1 SV=1			1.94527					Vacuole
A0A343LN25	9853.32	Polyubiquitin 2 (Fragment) OS=Arachis hypogaea OX=3818 GN=UBI2 PE=2 SV=1					4.33111			Cytoplasm
A0A3G1VVR8	9896.45	Uncharacterized protein OS=Arachis hypogaea OX=3818 PE=2 SV=1			3.21264		3.33966			Nucleus
Q45W85	9903.82	Lea protein 1 OS=Arachis hypogaea OX=3818 PE=2 SV=1				30.1868	3.81676	2.81975	42.9627	Nucleus
A0A1B1XWN1	9922.43	Two-component response regulator 5 (Fragment) OS=Arachis hypogaea OX=3818 GN=RR5 PE=2 SV=1				4.74016				Nucleus
H6U5A3	10062.8	50S ribosomal protein L30 (Fragment) OS=Aspergillus flavus OX=5059 PE=2 SV=1						12.0068		Chloroplast
B4UW98	10063.6	Transaldolase (Fragment) OS=Arachis hypogaea OX=3818 PE=2 SV=1			4.67223				11.8833	Cytoplasm
G0Y6T2	10082.8	Uncharacterized protein OS=Arachis hypogaea OX=3818 GN=303L13_2 PE=4 SV=1	5.2145							Chloroplast
E2DZJ6	10107.6	Putative mutator sub-class protein (Fragment) OS=Arachis diogoi OX=170720 PE=2 SV=1		1.51057					15.5126	Cell membrane
E5FHY1	10140.1	Late embryogenesis abundant protein group 1 protein OS=Arachis hypogaea OX=3818 GN=LEA1-2 PE=2 SV=1				3.52115				Nucleus
N1NF13	10169.3	Uncharacterized protein OS=Arachis hypogaea OX=3818 GN=ARAX_AHF417E07-019 PE=4 SV=1		1.79526					31.1415	Nucleus
E5FHZ3	10189.5	Late embryogenesis abundant protein group 6 protein OS=Arachis hypogaea OX=3818 GN=LEA6-1 PE=2 SV=1					17.7305			Mitochondria
E5FHZ6	10216	Late embryogenesis abundant protein group 8 protein OS=Arachis hypogaea OX=3818 GN=LEA8-1 PE=2 SV=1		3.01617						Nucleus
Q45W83;Q2PYP8	10266.5	Lea protein 3 OS=Arachis hypogaea OX=3818 PE=2 SV=1		1.58917			7.39576		3.21169	Mitochondria
E3NYT7	10276.1	Cinnamyl alcohol dehydrogenase (Fragment) OS=Arachis diogoi OX=170720 PE=2 SV=1					2.87166		27.3948	Chloroplast
Q5XXY3	10366.3	PR protein 4A (Fragment) OS=Arachis hypogaea OX=3818 PE=2 SV=1					2.15259		10.6838	Cell wall
Q850G8	10396.3	Putative lea 1 OS=Arachis hypogaea OX=3818 GN=Gsi-13 PE=2 SV=1							3.56109	Nucleus
Q2PYP5	10398.1	Putative transport protein Sec24C (Fragment) OS=Arachis hypogaea OX=3818 PE=2 SV=1			5.15308	3.45304				Nucleus
G0Y6T9	10497.5	Uncharacterized protein OS=Arachis hypogaea OX=3818 GN=303L13_9 PE=4 SV=1		2.02029	4.70728		3.5844	2.58669		Nucleus
A0A191UJA6	10640.5	30S ribosomal protein S19_ chloroplastic OS=Arachis hypogaea OX=3818 GN=rps19 PE=3 SV=1		7.00819	2.32883		9.59061	76.2776		Chloroplast
E2EAJ9	10884.3	Uncharacterized protein (Fragment) OS=Arachis diogoi OX=170720 PE=2 SV=1		2.61041				3.64693		Cell membrane
A0A173DXQ2;A0A173DXN4;A0A173DXN9;A0A173DXP4;A0A173DXP6;A0A173DXP9;A0A173DXQ3;A0A173DXQ4;A0A173DXQ5;A0A173DXQ7;A0A173DXR1;A0A1D8QQ19;A0A1D8QQ43;A0A286R2Z7;A0A286R3E5;A9XF85;B3TNJ0;Q49MT5	11041.3	Calmodulin (Fragment) OS=Aspergillus chevalieri OX=182096 GN=CMD PE=4 SV=1						1.59339	89.3175	Nucleus
E2E6R6	11074.6	Uncharacterized protein (Fragment) OS=Arachis diogoi OX=170720 PE=2 SV=1					1.90756			Nucleus
B4UWC2	11122.3	Gonadotropin beta chain OS=Arachis hypogaea OX=3818 PE=2 SV=1						8.4625		Nucleus
Q6PWW9	11129.4	ATP-dependent Clp protease ATP-binding subunit (Fragment) OS=Arachis hypogaea OX=3818 GN=ClpX PE=2 SV=1			3.16529			3.60209	18.8467	Nucleus
A0A191UJB9	11237.2	NAD(P)H-quinone oxidoreductase subunit 4L_ chloroplastic OS=Arachis hypogaea OX=3818 GN=ndhE PE=3 SV=1			2.67429			8.38422		Chloroplast
B4UW72	11255.8	Fiber protein Fb15 (Fragment) OS=Arachis hypogaea OX=3818 PE=2 SV=1			4.44702		2.82212			Cell wall
B4UW66	11285.8	Uncharacterized protein (Fragment) OS=Arachis hypogaea OX=3818 PE=2 SV=1						6.42313		Nucleus
M4SZZ9	11294.3	Microtubule-associated protein SPIRAL2 (Fragment) OS=Arachis hypogaea OX=3818 PE=2 SV=1					7.28729			Nucleus
B4UW52	11324.2	Putative nitrilase-associated protein (Fragment) OS=Arachis hypogaea OX=3818 PE=2 SV=1		1.90648						Chloroplast
N1NFT7	11328.1	Uncharacterized protein OS=Arachis duranensis OX=130453 GN=ARAX_ADH18B08-022 PE=4 SV=1					3.00728	9.31636		Cytoplasm
N1NK96	11453.8	60s Acidic ribosomal protein OS=Arachis duranensis OX=130453 GN=ARAX_ADH18B08-016 PE=3 SV=1							80.1011	Nucleus
G0Y6T1	11488	RNA-directed DNA polymerase OS=Arachis hypogaea OX=3818 GN=303L13_1 PE=4 SV=1		2.6155	3.50983					Nucleus
N1NJK2	11514.9	Uncharacterized protein OS=Arachis duranensis OX=130453 GN=ARAX_ADH51I17-83F22-007 PE=4 SV=1							262.334	Nucleus
Q2HP13	11521	Resistance protein Cf (Fragment) OS=Arachis hypogaea OX=3818 PE=4 SV=1	6.44205				162.864	710.8		Cell membrane
E2DZQ1	11570.1	Putative polyprotein (Fragment) OS=Arachis diogoi OX=170720 PE=2 SV=1				2.71097				Cell Wall
E2DTX0	11640.1	Exostosin-like protein (Fragment) OS=Arachis diogoi OX=170720 PE=2 SV=1		2.32637	2.08555				6.73379	Nucleus
N1NFW7;N1NKI0	11665.2	Uncharacterized protein OS=Arachis duranensis OX=130453 GN=ARAX_ADH035P21-015 PE=4 SV=1		1.90294						Extracellular matrix
N1NFW7;N1NKI0	11665.2	Uncharacterized protein OS=Arachis duranensis OX=130453 GN=ARAX_ADH035P21-015 PE=4 SV=1					5.30145			Extracellular matrix
E3NYV1	11742.5	Uncharacterized protein (Fragment) OS=Arachis diogoi OX=170720 PE=2 SV=1					1.63534			Chloroplast
E2E6S1	11747.3	Putative microtubule-associated protein (Fragment) OS=Arachis diogoi OX=170720 PE=2 SV=1						73.7447	5.57927	Nucleus
Q2KPJ8	11762.4	Resistance protein PRG (Fragment) OS=Arachis hypogaea OX=3818 PE=4 SV=1					3.36188	12.5193		Nucleus
B4UW84	11771.7	Glutathione-S-transferase 5 (Fragment) OS=Arachis hypogaea OX=3818 PE=2 SV=1						11.6259		Cytoplasm
A0A191UJ66	11818.8	30S ribosomal protein S14_ chloroplastic OS=Arachis hypogaea OX=3818 GN=rps14 PE=3 SV=1				3.47855				Chloroplast
G0Y6W8	11850.6	Uncharacterized protein OS=Arachis hypogaea OX=3818 GN=205D04_18 PE=4 SV=1							10.0068	Nucleus
E2DZK0	11852.6	Putative U3 small nucleolar RNA-associated protein (Fragment) OS=Arachis diogoi OX=170720 PE=2 SV=1			1.66725					Chloroplast
P86349	11954.4	Elongation factor G_ chloroplastic (Fragments) OS=Arachis hypogaea OX=3818 PE=1 SV=1		2.32341						Nucleus
N1NEU2	12157.5	Uncharacterized protein OS=Arachis duranensis OX=130453 GN=ARAX_ADH18B08-023 PE=4 SV=1			1.83117				25.126	Nucleus
B6CEX8	12164.2	Non-specific lipid-transfer protein OS=Arachis hypogaea OX=3818 PE=2 SV=1			4.43399			4.44689	8.35385	Mitochondria
A0A290GKI2	12209.9	Resistance protein (Fragment) OS=Arachis hypogaea OX=3818 PE=2 SV=1				5.44406				Cell membrane
A0A191UJ93	12245.5	30S ribosomal protein S18_ chloroplastic OS=Arachis hypogaea OX=3818 GN=rps18 PE=3 SV=1							8.90293	Cytoplasm
H6U5A1	12341.1	Hypersensitive-induced response protein (Fragment) OS=Arachis hypogaea OX=3818 PE=2 SV=1						2.61657		Nucleus
B4UW90	12429.7	Heat shock protein 3 (Fragment) OS=Arachis hypogaea OX=3818 PE=2 SV=1						2.62415		Golgi apparatus
B4UW90	12429.7	Heat shock protein 3 (Fragment) OS=Arachis hypogaea OX=3818 PE=2 SV=1							9.68384	Golgi apparatus
Q2KPJ9	12469.1	Resistance protein PRG (Fragment) OS=Arachis hypogaea OX=3818 PE=4 SV=1							12.9706	NA
B4UW77	12568.4	Gibberellin-regulated protein OS=Arachis hypogaea OX=3818 PE=2 SV=1						3.55187		Golgi apparatus
B4UWA5	12781.6	Uncharacterized protein OS=Arachis hypogaea OX=3818 PE=2 SV=1					5.56618		65.629	Chloroplast
B4UW76	12815.7	Gigantea (Fragment) OS=Arachis hypogaea OX=3818 PE=2 SV=1		12.8836			34.4538		12.7142	Chloroplast
Q06H30	12965.2	Auxin-induced protein (Fragment) OS=Arachis hypogaea OX=3818 PE=2 SV=1					64.4548		5.36828	Nucleus
E3NYU1	13012.3	Uncharacterized protein (Fragment) OS=Arachis diogoi OX=170720 PE=2 SV=1					2.70508	2.29437		Cell membrane
Q1PCR8	13088.1	Glutaredoxin (Fragment) OS=Arachis hypogaea OX=3818 PE=2 SV=1			1.9624		1.83372		2.87603	Cytoplasm
Q2LGI6	13106	ATP synthase gamma subunit (Fragment) OS=Arachis hypogaea OX=3818 GN=ATPC1 PE=2 SV=1					14.8166			Chloroplast
E3NYT8	13200.2	Chaperonin 60 alpha subunit (Fragment) OS=Arachis diogoi OX=170720 PE=2 SV=1					1.81523			Cytoplasm
A0A161U1V1	13238.4	30S ribosomal protein S12_ chloroplastic OS=Arachis hypogaea OX=3818 GN=rps12 PE=3 SV=1							7.2152	Cytoplasm
N1NJJ6	13248.9	Uncharacterized protein OS=Arachis duranensis OX=130453 GN=ARAX_ADH035P21-018 PE=4 SV=1		1.74873					169.44	Nucleus
E2EAZ2	13265.4	NB-LRR type disease resistance protein Rps1-k-2 (Fragment) OS=Arachis diogoi OX=170720 PE=2 SV=1		1.604	9.67719					Golgi apparatus
E2EAZ2	13265.4	NB-LRR type disease resistance protein Rps1-k-2 (Fragment) OS=Arachis diogoi OX=170720 PE=2 SV=1					3.73012	3.33506		Golgi apparatus
A0A173DXP5;A0A173DXN8;A0A173DXP1;A0A173DXP8;A0A173DXQ8;A0A173DXQ9;A0A1B2AIH3;A0A1B2AIH8;A0A1B2AIN0;M4T976;A0A2I8B285	13283.8	Beta-tubulin (Fragment) OS=Aspergillus amstelodami OX=5054 GN=B-tub PE=4 SV=1					1.84919			Chloroplast
N1NFU7	13299	Uncharacterized protein OS=Arachis duranensis OX=130453 GN=ARAX_ADH18B08-004 PE=4 SV=1					3.36161			Nucleus
E2DDA4	13330.9	SGT1-2-like protein (Fragment) OS=Arachis diogoi OX=170720 PE=2 SV=1		1.9973	24.0077					Chloroplast
N1NJL1	13345.9	Uncharacterized protein OS=Arachis duranensis OX=130453 GN=ARAX_ADH079023-072J06-013 PE=4 SV=1		3.29203			2.78763	12.2955	2.11694	Chloroplast
Q45W71	13459.3	Auxin-repressed protein OS=Arachis hypogaea OX=3818 PE=2 SV=1					4.17761	2.90296		Nucleus
Q06H38	13460.9	Syringolide-induced protein 14-1-1 (Fragment) OS=Arachis hypogaea OX=3818 PE=2 SV=1					2.22676		6.28713	Nucleus
B1PMD1	13503.1	Zinc finger protein ZFP133 OS=Arachis hypogaea OX=3818 PE=2 SV=1					6.06283			Nucleus
E3NYH9	13504.6	Glutathione S-transferase (Fragment) OS=Arachis diogoi OX=170720 PE=2 SV=1				5.43294		2.48576	1.86218	Cytoplasm
Q2KPR1	13529.5	Resistance protein PRG (Fragment) OS=Arachis hypogaea OX=3818 PE=4 SV=1							18.9987	Chloroplast
G0KWM1	13531.5	NB-LRR type disease resistance protein Rps1-k-1 (Fragment) OS=Arachis diogoi OX=170720 PE=2 SV=1		4.48052						Cell membrane
Q2PYP4	13538.1	RING-box protein OS=Arachis hypogaea OX=3818 GN=RBX1a PE=2 SV=1							8.17145	Nucleus
A0A191UJA2	13557.8	50S ribosomal protein L14_ chloroplastic OS=Arachis hypogaea OX=3818 GN=rpl14 PE=3 SV=1					2.78388			Chloroplast
E2DNI3	13637.4	Valine-tRNA ligase-like protein (Fragment) OS=Arachis diogoi OX=170720 PE=2 SV=1			5.27333					Chloroplast
D2JVK3	13672.7	Phenylalanine ammonia-lyase (Fragment) OS=Arachis hypogaea OX=3818 PE=4 SV=1					1.93624	10.6975	4.24108	Cytoskeleton
D8KYG3;E2DTX1	13772.8	Adenosine-5'-phosphosulfate reductase (Fragment) OS=Arachis diogoi OX=170720 PE=2 SV=1						15.1925		Cytoplasm
Q45W84	13791.5	Lea protein 2 OS=Arachis hypogaea OX=3818 PE=2 SV=1						3.45124		Nucleus
Q850G5	13883	Putative caffeic acid methyl transferase (Fragment) OS=Arachis hypogaea OX=3818 GN=Gsi-75 PE=2 SV=1			4.56431		12.1617			Chloroplast
Q2KPR3	13894	Resistance protein PRG (Fragment) OS=Arachis hypogaea OX=3818 PE=4 SV=1					2.70908			Cytoplasm
N1NJK7	13952.2	Uncharacterized protein OS=Arachis duranensis OX=130453 GN=ARAX_ADH079023-072J06-005 PE=4 SV=1		1.67065						Chloroplast
B4UWE3	14091.9	Peroxidase 2 (Fragment) OS=Arachis hypogaea OX=3818 PE=2 SV=1			25.8156			4.77663	46.6989	Chloroplast
A0A191UJ92	14120.9	50S ribosomal protein L20_ chloroplastic OS=Arachis hypogaea OX=3818 GN=rpl20 PE=3 SV=1					3.18415			Chloroplast
N1NKI6	14166.4	Uncharacterized protein OS=Arachis ipaensis OX=130454 GN=ARAX_AIPA147A20-011 PE=4 SV=1		2.68274			10.6618			Nucleus
E3NYU8	14222.5	30S ribosomal protein S13-1 (Fragment) OS=Arachis diogoi OX=170720 PE=2 SV=1							89.8728	Chloroplast
A0A1L5JJI0;Q850G6	14243.9	Late embryogenesis abundant protein 4 OS=Arachis hypogaea OX=3818 GN=LEA4 PE=2 SV=1							9.48445	Mitochondria
D3YM77;D8KXY3;D8KXY4;E3NYU5	14279.4	Acyl carrier protein OS=Arachis hypogaea OX=3818 GN=ACP3 PE=2 SV=1		3.92243					10.3236	Mitochondria
A6XN43	14297.5	Actin (Fragment) OS=Arachis hypogaea OX=3818 PE=2 SV=1				3.68161			5.67866	Cytoplasm
Q45W87	14307.8	Oleosin 1 OS=Arachis hypogaea OX=3818 PE=2 SV=1			15.3891	3.49596		3.23954	5.03447	Cell membrane
B4UWD2	14324	Myo-inisitol oxygenase (Fragment) OS=Arachis hypogaea OX=3818 PE=2 SV=1			56.5178		1.73388		5.81233	Cytoplasm and Cytosol
B4UWC9	14336.7	MCT-1 protein-like protein (Fragment) OS=Arachis hypogaea OX=3818 PE=2 SV=1			7.39191	37.0281	1.8501			Cytoplasm
Q45W86	14353.8	Oleosin 2 OS=Arachis hypogaea OX=3818 PE=2 SV=1						1.85294		Vacuole
Q2YHR1	14385.4	Pathogenesis-related protein 10 (Fragment) OS=Arachis hypogaea OX=3818 GN=PR10 PE=2 SV=1			3.95956			5.2729	29.6022	Cytoplasm
E3NYH5	14387.4	S-adenosyl methionine synthase (Fragment) OS=Arachis diogoi OX=170720 PE=2 SV=1			1.99589	3.04313	1.75065		2.1358	Cytoplasm and Cytosol
Q2PXP0	14450.8	Aspartokinase (Fragment) OS=Arachis hypogaea OX=3818 PE=2 SV=1				7.8598	7.45944			Mitochondria
B4UW51	14516.7	Class II small heat shock protein Le-HSP17.6 (Fragment) OS=Arachis hypogaea OX=3818 PE=2 SV=1			2.49902		9.64342	4.37703	7.56369	Cytoplasm
Q2KPM6	14656.9	Resistance protein PRG (Fragment) OS=Arachis hypogaea OX=3818 PE=4 SV=1				9.23468	3.58441			Nucleus
E2DZP7	14740.8	Uncharacterized protein (Fragment) OS=Arachis diogoi OX=170720 PE=2 SV=1						5.24914		Cytoplasm
Q2KPR4	14773.7	Resistance protein PRG (Fragment) OS=Arachis hypogaea OX=3818 PE=4 SV=1	1.60919							Cytoplasm
E3NYU3	14810	Chloroplast oxygen-evolving protein (Fragment) OS=Arachis diogoi OX=170720 PE=2 SV=1		2.46248	2.22093		6.65321			Chloroplast
A0A191UJ51	14817.1	ATP synthase epsilon chain_ chloroplastic OS=Arachis hypogaea OX=3818 GN=atpE PE=3 SV=1					4.65335			Chloroplast
H9L7W2	14819.7	Acyl carrier protein OS=Arachis hypogaea OX=3818 GN=ACP PE=2 SV=1		1.99308	29.3721		1.83584			Chloroplast
Q45W78	14901.4	Ubiquitin fusion protein OS=Arachis hypogaea OX=3818 PE=2 SV=1			1.61274		1.82584	5.71119		Nucleus
B4UW59	14919	Double-stranded DNA-binding protein OS=Arachis hypogaea OX=3818 PE=2 SV=1			4.71215		7.17465	3.99671	5.07286	Nucleus
A0A0K0KBH8	14971.1	Squamosa promoter-binding-like protein (Fragment) OS=Arachis hypogaea OX=3818 GN=SPL3 PE=2 SV=1							5.38296	Nucleus
B4UWC7	14974	Malate dehydrogenase (Fragment) OS=Arachis hypogaea OX=3818 PE=2 SV=1					2.12758			Chloroplast
A0A290G022	14983.9	Resistance protein (Fragment) OS=Arachis hypogaea OX=3818 PE=2 SV=1			11.9999					Cytoplasm
V9QFK7	15012	Glyceraldehyde-3-phosphate dehydrogenase (Fragment) OS=Cochliobolus miyabeanus OX=101162 GN=GPD PE=3 SV=1				2.31923		2.89868		Cytoplasm
D8KXY1	15023.1	Acyl carrier protein OS=Arachis hypogaea OX=3818 GN=ACP1 PE=2 SV=1			3.19417					Chloroplast
E3NYT9	15034.7	60S ribosomal protein L1 (Fragment) OS=Arachis diogoi OX=170720 PE=2 SV=1			2.09055		34.2092	2.81303		Nucleus
A0A191UJA8	15049.6	30S ribosomal protein S11_ chloroplastic OS=Arachis hypogaea OX=3818 GN=rps11 PE=3 SV=1							5.22754	Chloroplast
B4UWD5	15127.3	Proteasome subunit alpha type (Fragment) OS=Arachis hypogaea OX=3818 PE=2 SV=1			1.58176					Cytoplasm
Q2KPR8;Q2KPR5	15161.2	Resistance protein PRG (Fragment) OS=Arachis hypogaea OX=3818 PE=4 SV=1		3.5312						Cytoplasm
Q06H28	15186.5	Photosystem I psaH protein OS=Arachis hypogaea OX=3818 PE=2 SV=1		21.1861						Chloroplast
P85086	15217.4	Ribulose bisphosphate carboxylase/oxygenase activase_ chloroplastic (Fragments) OS=Arachis hypogaea OX=3818 GN=RCA PE=1 SV=1			4.43144				14.3799	Cytoplasm
P85086	15217.4	Ribulose bisphosphate carboxylase/oxygenase activase_ chloroplastic (Fragments) OS=Arachis hypogaea OX=3818 GN=RCA PE=1 SV=1								Cytoplasm
A0A191UJ99	15275.9	30S ribosomal protein S8_ chloroplastic OS=Arachis hypogaea OX=3818 GN=rps8 PE=3 SV=1			6.16414		21.3777	11.3836	3.47292	Cytoplasm
D3Y2R1;E6YBQ0;E6YBP9;E6YBQ1	15300.2	Acyl carrier protein OS=Arachis hypogaea OX=3818 GN=ACP4 PE=2 SV=1					35.1971	10.415	2.67586	Chloroplast
Q1HDS7;Q45W82	15311.7	Superoxide dismutase [Cu-Zn] OS=Arachis hypogaea OX=3818 PE=2 SV=1							15.3548	Cytoplasm
L0HNF3	15372.9	Violaxanthin de-epoxidase (Fragment) OS=Arachis hypogaea OX=3818 PE=2 SV=1		1.53681						Chloroplast
A0A290GEI9	15381.3	Resistance protein (Fragment) OS=Arachis hypogaea OX=3818 PE=2 SV=1							6.96409	Nucleus
E6YBP9;E6YBQ0;D3Y2R1;E6YBQ1	15401.3	Acyl carrier protein OS=Arachis hypogaea OX=3818 GN=ACP4 PE=2 SV=1		4.0627						Chloroplast
E2DDA6	15452.7	70 kDa heat shock protein-like protein (Fragment) OS=Arachis diogoi OX=170720 PE=2 SV=1			3.77525		7.68232		12.2914	Chloroplast
E3NYG4;B4UW93	15483	HMG1 protein (Fragment) OS=Arachis diogoi OX=170720 PE=2 SV=1					5.0924			Nucleus
G0Y6T8	15540.4	Uncharacterized protein OS=Arachis hypogaea OX=3818 GN=303L13_8 PE=4 SV=1					1.65494	7.63943	7.07316	Nucleus
A0A0A6ZDY1	15562.5	Peptidyl-prolyl cis-trans isomerase OS=Arachis hypogaea OX=3818 PE=2 SV=1		2.55645	2.95933		3.28366	8.96695	5.97307	Nucleus
Q647G4	15584	Oleosin 2 (Fragment) OS=Arachis hypogaea OX=3818 PE=2 SV=1				3.44584	1.88776	3.64369	29.2593	Cell membrane
A0A191UJA5;A0A1C7D2C6	15632.3	50S ribosomal protein L16_ chloroplastic OS=Arachis hypogaea OX=3818 GN=rpl16 PE=3 SV=1				13.6224				Cytoplasm
E2DDA5	15741.6	NAD-dependent epimerase/dehydratase-like protein (Fragment) OS=Arachis diogoi OX=170720 PE=2 SV=1	2.93279							Nucleus
Q2KQ39;Q2KQ51;Q2KQ16	15776.9	Resistance protein PLTR (Fragment) OS=Arachis hypogaea OX=3818 PE=4 SV=1	2.41515							Cytoplasm
Q2KQ39;Q2KQ51	15776.9	Resistance protein PLTR (Fragment) OS=Arachis hypogaea OX=3818 PE=4 SV=1					4.80268			Cytoplasm
E3NYH4	15795.6	Uncharacterized protein (Fragment) OS=Arachis diogoi OX=170720 PE=2 SV=1						4.30509		Cell membrane
H6U5A6	15797.1	Sensor histidine kinase/response regulator (Fragment) OS=Aspergillus flavus OX=5059 PE=2 SV=1							15.2634	Cytoplasm
N1NKE6	15862.5	Uncharacterized protein OS=Arachis duranensis OX=130453 GN=ARAX_ADH079023-072J06-006 PE=4 SV=1					2.24705			Nucleus
U3MF97	15862.6	40S ribosomal protein S23 OS=Arachis hypogaea OX=3818 PE=2 SV=1					1.67557		9.17307	Nucleus
E2EAZ1	15950.3	SWI/SNF complex subunit (Fragment) OS=Arachis diogoi OX=170720 PE=2 SV=1			2.62667					Nucleus
E2EAZ1	15950.3	SWI/SNF complex subunit (Fragment) OS=Arachis diogoi OX=170720 PE=2 SV=1					3.50837			Nucleus
N1NFU5	15985.1	Putative LSD1 zinc finger domain protein OS=Arachis duranensis OX=130453 GN=ARAX_ADH51I17-83F22-006 PE=4 SV=1						17.2273		Chloroplast
B4UWC5	15985.8	Mago nashi-like protein (Fragment) OS=Arachis hypogaea OX=3818 PE=2 SV=1		2.37695			4.38135		98.1932	Nucleus
N1NKF7	15991.1	Glycerol-3-phosphate dehydrogenase OS=Arachis duranensis OX=130453 GN=ARAX_ADH129F24-001 PE=3 SV=1				22.4684				Chloroplast
B4UW50	15999.9	Chitinase-like protein (Fragment) OS=Arachis hypogaea OX=3818 PE=2 SV=1						16.1917	4.97683	Cell membrane
Q1PCR4	16072.2	Putative IN2-1 protein (Fragment) OS=Arachis hypogaea OX=3818 PE=2 SV=1	1.79561		9.02514		6.41414		3.25689	Nucleus
A0A290GK58	16084.4	Resistance protein (Fragment) OS=Arachis hypogaea OX=3818 PE=2 SV=1					2.47801		18.4655	NA
B2LR67	16095.4	NBS-LRR type disease resistance protein GnRGC10 (Fragment) OS=Arachis hypogaea OX=3818 PE=4 SV=1						17.2138	4.57	Cytoplasm
A0A290GJZ2	16097.4	Adenylyl cyclase-associated protein (Fragment) OS=Arachis hypogaea OX=3818 PE=2 SV=1	2.10698		2.48977					Chloroplast
Q5XXQ4	16218.5	PR10 protein OS=Arachis hypogaea OX=3818 GN=PR10 PE=2 SV=1						1.8509		Cytoplasm
E2DI10	16256.1	Chloroplast ribonucleoprotein (Fragment) OS=Arachis diogoi OX=170720 PE=2 SV=1		8.61396			2.11907		11.9283	Chloroplast
Q2PK12	16261.4	Actin depolymerizing factor-like protein OS=Arachis hypogaea OX=3818 PE=2 SV=1	1.7028		2.1154					Cytoskeleton
Q0G866	16350	NBS-LRR type disease resistance protein GnRGC2 (Fragment) OS=Arachis hypogaea OX=3818 PE=4 SV=1		2.85386			2.39325	2.80144	4.6226	Cytoplasm
B0YIU5	16412.5	Ara h 8 allergen isoform OS=Arachis hypogaea OX=3818 PE=2 SV=1			6.29733	4.43468		14.3181	13.1052	Cytoplasm
N1NFX0	16432.5	Uncharacterized protein OS=Arachis hypogaea OX=3818 GN=ARAX_AHF417E07-001 PE=4 SV=1	1.64903	2.80427	1.68445		1.61467	2.54044		Chloroplast
Q45W80	16438.9	Nucleoside diphosphate kinase OS=Arachis hypogaea OX=3818 PE=2 SV=1			5.00433					Cytoplasm
Q45W80	16438.9	Nucleoside diphosphate kinase OS=Arachis hypogaea OX=3818 PE=2 SV=1						27.8125		Cytoplasm
E2DQY8	16446.3	Heat shock protein DnaJ N-terminal domain-containing protein (Fragment) OS=Arachis diogoi OX=170720 PE=2 SV=1					1.73958			Nucleus
E5FHY4	16481.9	Late embryogenesis abundant protein group 3 protein OS=Arachis hypogaea OX=3818 GN=LEA3-1 PE=2 SV=1	1.78669		4.11122					Nucleus
E5FHY4;E5FHY5	16481.9	Late embryogenesis abundant protein group 3 protein OS=Arachis hypogaea OX=3818 GN=LEA3-1 PE=2 SV=1						7.15442	2.7392	Nucleus
H6U5A2	16551.3	Fructose-2_6-bisphosphatase (Fragment) OS=Aspergillus flavus OX=5059 PE=2 SV=1					3.0592			Nucleus
A0A290GI45	16575.9	Resistance protein (Fragment) OS=Arachis hypogaea OX=3818 PE=2 SV=1					4.38079			Cell wall
H6U597	16579.8	LRR receptor-like serine/threonine-protein kinase (Fragment) OS=Arachis hypogaea OX=3818 PE=2 SV=1							10.3376	Cytoplasm
Q6R2U4;Q6R2U7;Q6PWX0;U5Y4L6;Q6R2U6	16687.5	Calmodulin OS=Arachis hypogaea OX=3818 GN=CaM1 PE=4 SV=1	19.8008						9.95495	Nucleus
Q2KQ09	16703.9	Resistance protein PLTR (Fragment) OS=Arachis hypogaea OX=3818 PE=4 SV=1			2.21983	6.0827				Cytoplasm
A0A290GJW8;A0A290G0G2	16779.9	Resistance protein (Fragment) OS=Arachis hypogaea OX=3818 PE=2 SV=1			3.45373					Nucleus
B4UWB3	16788.6	Putative L24 ribosomal protein OS=Arachis hypogaea OX=3818 PE=2 SV=1					33.7805	29.1087		Cytoplasm
G0Y6V5	16868.3	Uncharacterized protein OS=Arachis hypogaea OX=3818 GN=205D04_5 PE=4 SV=1						1.75413	12.9561	Chloroplast
E2D2C6	16908.8	Glutathione-regulated potassium-efflux system protein KefB-like protein (Fragment) OS=Arachis diogoi OX=170720 PE=2 SV=1	2.12895							Chloroplast
E2D2C6	16908.8	Glutathione-regulated potassium-efflux system protein KefB-like protein (Fragment) OS=Arachis diogoi OX=170720 PE=2 SV=1					37.8818			Chloroplast
B1PYZ4	16910.3	Ara h 8 allergen isoform 3 OS=Arachis hypogaea OX=3818 PE=3 SV=1			1.79136			8.78769	43.026	Cytoplasm
Q06H19	16918.7	UDP-glucose pyrophosphorylase (Fragment) OS=Arachis hypogaea OX=3818 PE=2 SV=1					8.92141	40.6289	18.8592	Cytoplasm
B2ZGS2	16920.2	Pathogenesis-related class 10 protein OS=Arachis hypogaea OX=3818 GN=PR10 PE=2 SV=1			3.35575			68.4972	65.2157	Cytoplasm
Q647G3	16932.2	Oleosin OS=Arachis hypogaea OX=3818 PE=2 SV=1					2.12516		4.23563	Cell membrane
Q6VT83;Q2YHR1	16952.3	Ara h 8 allergen OS=Arachis hypogaea OX=3818 PE=1 SV=1							5.49697	Cytoplasm
G0Y6W3	17084.6	Uncharacterized protein OS=Arachis hypogaea OX=3818 GN=205D04_13 PE=4 SV=1					12.7164		4.58023	Chloroplast
Q06H39	17099.5	Syntaxin (Fragment) OS=Arachis hypogaea OX=3818 PE=2 SV=1					3.87194	20.5584	6.66034	Vacuole
E2E6R2	17181.2	Uncharacterized protein (Fragment) OS=Arachis diogoi OX=170720 PE=2 SV=1		1.82328						Cytoplasm
E2E6R2	17181.2	Uncharacterized protein (Fragment) OS=Arachis diogoi OX=170720 PE=2 SV=1					1.57352		11.7963	Cytoplasm
Q2PYP7;Q2PXN2	17182.5	17.3 kDa class I heat shock protein (Fragment) OS=Arachis hypogaea OX=3818 PE=2 SV=1							2.97268	Cytoplasm
Q2KPN0	17218.9	Resistance protein PRG (Fragment) OS=Arachis hypogaea OX=3818 PE=4 SV=1			1.60395			3.91692		Cytoplasm
E5FHZ0	17232.8	Late embryogenesis abundant protein group 4 protein OS=Arachis hypogaea OX=3818 GN=LEA4-2 PE=2 SV=1		1.76568				12.7996		Nucleus
Q45W77;Q06H20	17262.9	Ubiquitin-conjugating enzyme 1 OS=Arachis hypogaea OX=3818 PE=2 SV=1					31.5467			Mitochondrion
A1DZE9	17346.4	Conglutin 8 OS=Arachis hypogaea OX=3818 PE=2 SV=1	2.34202			2.912		64.5194	8.93438	Nucleus
B4UW78	17388.6	Glutamine synthetase GS56 (Fragment) OS=Arachis hypogaea OX=3818 PE=2 SV=1		12.5001			3.3613	3.60672	46.426	Cytoplasm
A0A161ALZ1	17403.3	30S ribosomal protein S7_ chloroplastic OS=Arachis hypogaea OX=3818 GN=rps7 PE=3 SV=1					1.58099		72.8306	Cytoplasm
A0A290G016	17433.7	Resistance protein (Fragment) OS=Arachis hypogaea OX=3818 PE=2 SV=1			1.66915					Nucleus
Q850G7	17474.3	Putative extensin/nodulin protein (Fragment) OS=Arachis hypogaea OX=3818 GN=Gsi-15 PE=2 SV=1			3.70519		2.04646			Nucleus
Q2KQ25	17477.6	Resistance protein PLTR (Fragment) OS=Arachis hypogaea OX=3818 PE=4 SV=1					3.48519			Nucleus
Q45W69	17486.5	Uncharacterized protein OS=Arachis hypogaea OX=3818 PE=2 SV=1	12.7103				10.6788			Cell membrane
Q647G9;A5Z1Q6;A5Z1R0;A5Z1Q5	17490.5	Conglutin OS=Arachis hypogaea OX=3818 PE=1 SV=1		1.74976	18.8191	2.82576		70.3756	31.5374	Extracellular region
A5Z1Q5	17491.5	Ara d 6 OS=Arachis duranensis OX=130453 GN=Ara d 6 PE=2 SV=1							31.5374	Nucleus
E3JPR7;G9HPX7	17495.8	ADP-ribosylation factor (Fragment) OS=Arachis diogoi OX=170720 PE=2 SV=1					3.98065			Endoplasmic reticulum
Q06H32;B4UWE4	17536.2	Thioredoxin fold OS=Arachis hypogaea OX=3818 PE=2 SV=1							62.4027	Cytoplasm
E3NYU2	17552.6	Rubisco activase 2 (Fragment) OS=Arachis diogoi OX=170720 PE=2 SV=1			1.60466		3.50348			Chloroplast
Q6YDA0	17663.2	Resistance protein (Fragment) OS=Arachis stenosperma OX=217475 PE=4 SV=1							23.2906	Nucleus
N1NFZ5	17688.7	Uncharacterized protein OS=Arachis duranensis OX=130453 GN=ARAX_ADH179B13-002 PE=4 SV=1		1.94197	1.93995				21.4228	Chloroplast
J7LMM2	17713.8	Eukaryotic translation initiation factor 5A OS=Arachis hypogaea OX=3818 GN=IF5A PE=2 SV=1			2.75355		2.10503	10.4939	5.67632	Cytoplasm
Q2KPW1	17778.4	Resistance protein PNTR (Fragment) OS=Arachis hypogaea OX=3818 PE=4 SV=1		4.05726					5.7326	Cytoplasm
Q647G5	17809.6	Oleosin 17.8 OS=Arachis hypogaea OX=3818 PE=2 SV=2					1.86763	2.04859	8.04582	Cell membrane
Q2KPX0;Q2KPZ7	17816.7	Resistance protein PLTR (Fragment) OS=Arachis hypogaea OX=3818 PE=4 SV=1							35.7859	Cytoplasm
Q6YD99	17824.5	Resistance protein (Fragment) OS=Arachis stenosperma OX=217475 PE=4 SV=1						3.66782		Cytoplasm
C0L2U7	17861.8	Uncharacterized protein OS=Arachis hypogaea OX=3818 PE=4 SV=1					2.47525	6.50425		Nucleus
Q6YDG7	17866.4	Resistance protein (Fragment) OS=Arachis duranensis OX=130453 PE=4 SV=1					3.30288			Cytoplasm
Q6YD95;Q6YDH1;Q2KPZ1	17872.2	Resistance protein (Fragment) OS=Arachis stenosperma OX=217475 PE=4 SV=1						3.55113		Cytoplasm
Q06H21	17879.7	Ubiquitin/ribosomal protein S27a OS=Arachis hypogaea OX=3818 PE=2 SV=1		1.92385	1.7087		3.09444			Nucleus
E5FHY9	17921.6	Late embryogenesis abundant protein group 4 protein OS=Arachis hypogaea OX=3818 GN=LEA4-1 PE=2 SV=1			2.35443			5.51204	4.89688	Nucleus
Q6YDA4	17934.4	Resistance protein (Fragment) OS=Arachis stenosperma OX=217475 PE=4 SV=1		1.86763			3.89276	2.68821		Cytoplasm
Q0PCD6	17942.4	NBS-LRR type disease resistance protein GnRGC1 (Fragment) OS=Arachis hypogaea OX=3818 PE=4 SV=1	2.26021		3.61312				6.69335	Chloroplast
Q5UIP9;Q5UIQ0	17977.6	Mannose glucose binding lectin (Fragment) OS=Phytophthora capsici OX=4784 PE=2 SV=1			8.40393			22.1399	8.23235	Nucleus
Q0PCD1;B2LR82	17989.7	NBS-LRR type disease resistance protein GnRGC7 (Fragment) OS=Arachis hypogaea OX=3818 PE=4 SV=1					9.4763			Cytoplasm
E5FHY6	18003.2	Late embryogenesis abundant protein group 3 protein (Fragment) OS=Arachis hypogaea OX=3818 GN=LEA3-3 PE=2 SV=1			3.67269					Nucleus
Q6YDE2;Q6YDE8	18003.7	Resistance protein (Fragment) OS=Arachis cardenasii OX=51121 PE=4 SV=1					3.95573		55.1617	Nucleus
N1NG02	18014.3	Uncharacterized protein OS=Arachis hypogaea OX=3818 GN=ARAX_AHF417E07-004 PE=3 SV=1					2.64729	5.51002		Cytoplasm
Q0PCD3	18050.6	NBS-LRR type disease resistance protein GnRGC5 (Fragment) OS=Arachis hypogaea OX=3818 PE=4 SV=1					3.85841			Cytoplasm
A0A0K0K9R9	18078.7	Universal stress protein OS=Arachis diogoi OX=170720 PE=2 SV=1					5.69137			Cytoplasm
B4UWD7	18085.7	N-acetyltransferase (Fragment) OS=Arachis hypogaea OX=3818 PE=2 SV=1		1.52528						Chloroplast
B4UW89;B4UW88	18100.5	Heat shock protein 2 OS=Arachis hypogaea OX=3818 PE=2 SV=1	1.97252			2.49227	1.99005		5.24129	Cytoplasm
Q45W76	18108.5	Ubiquitin-conjugating enzyme 2 OS=Arachis hypogaea OX=3818 PE=2 SV=1						18.4435		Cytoplasm
A0A0K0KBG8	18109.4	Squamosa promoter-binding-like protein OS=Arachis hypogaea OX=3818 GN=SPL3 PE=2 SV=1						9.22963	5.22453	Nucleus
Q6YDC4	18122.3	Resistance protein (Fragment) OS=Arachis stenosperma OX=217475 PE=4 SV=1							3.74743	Cytoplasm
Q6YDA3	18123.7	Resistance protein (Fragment) OS=Arachis stenosperma OX=217475 PE=4 SV=1					3.23565	2.30707		Cytoplasm
Q6YDD4	18174.7	Resistance protein (Fragment) OS=Arachis cardenasii OX=51121 PE=4 SV=1			14.2584	2.30663		8.46397	58.7216	Nucleus
Q6YD97;Q6YDB3	18179	Resistance protein (Fragment) OS=Arachis stenosperma OX=217475 PE=4 SV=1						4.09349		Nucleus
Q6YDB6;Q6YDE5	18180.9	Resistance protein (Fragment) OS=Arachis stenosperma OX=217475 PE=4 SV=1					1.95923		6.06821	Mitochondrion
Q6YDG1	18230.8	Resistance protein (Fragment) OS=Arachis cardenasii OX=51121 PE=4 SV=1						2.73363		Nucleus
B4UW75	18246.9	Gibberellin 2-oxidase (Fragment) OS=Arachis hypogaea OX=3818 PE=2 SV=1					3.93631	2.81069	7.94847	Cytoplasm
Q6YDF8	18252.6	Resistance protein (Fragment) OS=Arachis cardenasii OX=51121 PE=4 SV=1						6.76839		Cytoplasm
Q2KPX1	18253.7	Resistance protein PLTR (Fragment) OS=Arachis hypogaea OX=3818 PE=4 SV=1		1.67913						Cytoplasm
B2LR77	18254.2	NBS-LRR type disease resistance protein GnRGC4m (Fragment) OS=Arachis hypogaea OX=3818 PE=4 SV=1					7.22973			Chloroplast
N1NEX4	18273.6	Uncharacterized protein OS=Arachis duranensis OX=130453 GN=ARAX_ADH079023-072J06-016 PE=4 SV=1		2.16806						Nucleus
N1NEX4	18273.6	Uncharacterized protein OS=Arachis duranensis OX=130453 GN=ARAX_ADH079023-072J06-016 PE=4 SV=1						15.6022	3.75907	Nucleus
E3NYG5	18277	SecY protein (Fragment) OS=Arachis diogoi OX=170720 PE=2 SV=1					2.1433			Plasma membrane
Q45W79	18302.4	Calcium-binding pollen allergen OS=Arachis hypogaea OX=3818 PE=2 SV=1	2.30181							Vacuole
Q6YDF2	18312.8	Resistance protein (Fragment) OS=Arachis cardenasii OX=51121 PE=4 SV=1					1.93814		7.76652	Cytoplasm
A0A075M585	18327.9	Ribulose bisphosphate carboxylase small chain (Fragment) OS=Arachis duranensis OX=130453 GN=rbcS PE=3 SV=1					4.68178			Chloroplast
A0A0A6ZDN9;E3NYI6;G9HPX8	18329.7	Peptidyl-prolyl cis-trans isomerase OS=Arachis hypogaea OX=3818 PE=2 SV=1					4.93548	3.76079		Cytoplasm
G9HPX8	18341.7	Peptidyl-prolyl cis-trans isomerase OS=Arachis hypogaea OX=3818 GN=CYC PE=2 SV=1		3.96127	3.97237					Cytoplasm
Q0PCD0	18358	NBS-LRR type disease resistance protein GnRGC8 (Fragment) OS=Arachis hypogaea OX=3818 PE=4 SV=1							3.4507	Cytoplasm
Q6YDA1	18415.3	Resistance protein (Fragment) OS=Arachis stenosperma OX=217475 PE=4 SV=1		1.85422	1.74008	3.48413				Mitochondrion
Q6YDA1	18415.3	Resistance protein (Fragment) OS=Arachis stenosperma OX=217475 PE=4 SV=1							3.66584	Mitochondrion
H6U5A7	18446.7	DNA lyase (Fragment) OS=Aspergillus flavus OX=5059 PE=2 SV=1					17.053		2.96752	Nucleus
B2LR85	18467.2	NBS-LRR type disease resistance protein GnRGC12 (Fragment) OS=Arachis hypogaea OX=3818 PE=4 SV=1						10.8322	26.606	Chloroplast
N1NFY5	18487.3	Uncharacterized protein OS=Arachis duranensis OX=130453 GN=ARAX_ADH079023-072J06-015 PE=4 SV=1					1.9891			Nucleus
Q6YDB9	18503.2	Resistance protein (Fragment) OS=Arachis stenosperma OX=217475 PE=4 SV=1		9.06446				3.38689	4.05376	Chloroplast
B2LR83	18514.1	NBS-LRR type disease resistance protein GnRGC8a (Fragment) OS=Arachis hypogaea OX=3818 PE=4 SV=1		1.92681						Cytoplasm
Q9AXI0	18514.5	Oleosin variant B OS=Arachis hypogaea OX=3818 PE=2 SV=1					4.19277		5.59585	Cell membrane
Q2KQ63	18571.3	Resistance protein PLTR (Fragment) OS=Arachis hypogaea OX=3818 PE=4 SV=1		3.02215	8.34212			2.06059		Cytoplasm
E3NYT3	18580.3	Dirigent protein (Fragment) OS=Arachis diogoi OX=170720 PE=2 SV=1					1.90662			Cytoplasm
Q2KQ65	18645.3	Resistance protein PLTR (Fragment) OS=Arachis hypogaea OX=3818 PE=4 SV=1						15.5379		Cytoplasm
A1YZE3	18651.7	Sucrose-phosphate synthase (Fragment) OS=Arachis hypogaea OX=3818 PE=2 SV=1					9.21573		5.67909	Mitochondrion
A0A191UJ62	18667.3	NAD(P)H-quinone oxidoreductase subunit J_ chloroplastic OS=Arachis hypogaea OX=3818 GN=ndhJ PE=3 SV=1			2.5639			6.34883		Chloroplast
B2LR80;Q0PCD2	18721.4	NBS-LRR type disease resistance protein GnRGC6c (Fragment) OS=Arachis hypogaea OX=3818 PE=4 SV=1		2.92487				10.6024		Cytoplasm
Q06H22	18770.1	Ubiquitin-conjugating enzyme OS=Arachis hypogaea OX=3818 PE=2 SV=1						4.5612		Nucleus
B2LR74	18784.6	NBS-LRR type disease resistance protein GnRGC4j (Fragment) OS=Arachis hypogaea OX=3818 PE=4 SV=1					8.3726			Chloroplast
Q6YDF5	18790	Resistance protein (Fragment) OS=Arachis cardenasii OX=51121 PE=4 SV=1							3.85793	Cytoplasm
Q0PCD5	18793.2	NBS-LRR type disease resistance protein GnRGC3 (Fragment) OS=Arachis hypogaea OX=3818 PE=4 SV=1						4.50253		Chloroplast
Q647G8	18797.7	2S protein 2 OS=Arachis hypogaea OX=3818 PE=2 SV=1		1.86572						Nucleus
Q1HFN5	18812	Glyoxalase II (Fragment) OS=Arachis hypogaea OX=3818 PE=2 SV=1		4.02098						Cytoplasm
Q1HFN5	18812	Glyoxalase II (Fragment) OS=Arachis hypogaea OX=3818 PE=2 SV=1							5.36851	Cytoplasm
Q6YDF6;Q2KPX0;Q2KPZ6;Q2KPZ7;Q2KQ23;Q2KQ34;Q2KQ41;Q2KQ50;Q2KQ54	18816.7	Resistance protein (Fragment) OS=Arachis cardenasii OX=51121 PE=4 SV=1						7.82686		Cytoplasm
Q0G861	18820.9	NBS-LRR type disease resistance protein GnRGC6b (Fragment) OS=Arachis hypogaea OX=3818 PE=4 SV=1					6.26177			Chloroplast
Q6YDA2	18830.6	Resistance protein (Fragment) OS=Arachis stenosperma OX=217475 PE=4 SV=1		1.67626						Cytoplasm
A0A290G032	18862.8	Resistance protein (Fragment) OS=Arachis hypogaea OX=3818 PE=2 SV=1					2.24439	7.14293		Cytoplasm
N1NKF2	18908.3	Uncharacterized protein OS=Arachis duranensis OX=130453 GN=ARAX_ADH079023-072J06-014 PE=4 SV=1						9.79911		Nucleus
Q6YDG0;Q6YD98;Q6YDC3	18941.3	Resistance protein (Fragment) OS=Arachis cardenasii OX=51121 PE=4 SV=1	7.96508		25.3021					Nucleus
A0A290G071	19011.8	Resistance protein (Fragment) OS=Arachis hypogaea OX=3818 PE=2 SV=1					12.4811	34.2534	40.5323	Cytoplasm
Q6YDC3	19028.5	Resistance protein (Fragment) OS=Arachis stenosperma OX=217475 PE=4 SV=1						9.90977		Mitochondrion
G0Y6V2	19029.6	TIR disease resistance protein OS=Arachis hypogaea OX=3818 GN=205D04_2 PE=4 SV=1					4.13764			Chloroplast
E3NYT2	19035.1	Heat shock protein 70 (Fragment) OS=Arachis diogoi OX=170720 PE=2 SV=1		3.62072			1.95751	3.02537		Chloroplast
E9LFF0	19080.6	11S arachin (Fragment) OS=Arachis hypogaea OX=3818 PE=2 SV=1		4.00588			6.16913	5.38034	2.76045	Vacuole
D7NLI8	19084.7	Resistance protein p9 (Fragment) OS=Arachis hypogaea OX=3818 GN=pnbs PE=2 SV=1				4.13257			278.499	Cyoplasm
C0L2U9;C0L2V7	19094.1	Putative stress enhanced protein 1 OS=Arachis hypogaea OX=3818 PE=4 SV=1		1.55811						Chloroplast
B4UWE0	19113.6	Pectinesterase (Fragment) OS=Arachis hypogaea OX=3818 PE=2 SV=1							2.09013	Cytoplasm
Q06H25	19120.1	Tyrosine phosphatase (Fragment) OS=Arachis hypogaea OX=3818 PE=2 SV=1						88.2282	67.3789	Nucleus
Q06H31	19184.7	Translationally controlled tumor-like protein OS=Arachis hypogaea OX=3818 PE=2 SV=1		2.30653			5.03684	8.04601		Cytoplasm
A0A1B1J964	19194.4	AP2-like ethylene-responsive transcription factor ANT-like protein (Fragment) OS=Arachis hypogaea OX=3818 PE=2 SV=1			1.64541		5.16039			Nucleus
A0A290G546	19211.9	Resistance protein (Fragment) OS=Arachis hypogaea OX=3818 PE=2 SV=1	13.5273		3.78968			29.7739		Cell membrane
A8VT45;A8VT44	19218.1	Conglutin OS=Arachis duranensis OX=130453 GN=ara d 2 PE=4 SV=1					7.1158		7.71981	Extracellular region
D8KZF5	19239	Uncharacterized protein (Fragment) OS=Arachis diogoi OX=170720 PE=2 SV=1						14.2565		Nucleus
Q06H34	19260.6	Tonoplast intrinsic protein alpha TIP (Fragment) OS=Arachis hypogaea OX=3818 PE=2 SV=1							8.15106	Plasma membrane
Q2KPP3;Q6YDE7;Q2KPR9	19274.9	Resistance protein PRG (Fragment) OS=Arachis hypogaea OX=3818 PE=4 SV=1		5.64119		18.5651				Nucleus
B4UWB8	19293.5	Putative Lil3 protein (Fragment) OS=Arachis hypogaea OX=3818 PE=2 SV=1					1.61745		12.3477	Nucleus
K7PQ65	19307.4	Mother of FT and TFL1 OS=Arachis hypogaea OX=3818 GN=MFT PE=2 SV=1				4.61305				cytoplasm
A0A191UJ56	19354.7	Photosystem I assembly protein Ycf3 OS=Arachis hypogaea OX=3818 GN=ycf3 PE=3 SV=1		1.66966	2.20615		1.77842	4.99696	9.33932	Chloroplast
A0A191UJC8	19534.5	NAD(P)H-quinone oxidoreductase subunit I_ chloroplastic OS=Arachis hypogaea OX=3818 GN=ndhI PE=3 SV=1				2.0316	3.51912		9.32732	Nucleus
Q2KQ07;Q2KQ06;Q2KQ08	19540.3	Resistance protein PLTR (Fragment) OS=Arachis hypogaea OX=3818 PE=4 SV=1							13.0301	Cytoplasm
A0A1I9LV35	19607.1	Symbiotic remorin OS=Arachis hypogaea OX=3818 GN=SYMREM PE=2 SV=1				7.1754		2.0508	2.53047	Cell membrane
Q2KQ18	19615.4	Resistance protein PLTR (Fragment) OS=Arachis hypogaea OX=3818 PE=4 SV=1			6.05791		1.78507			Cytoplasm
Q6YDF7	19623.7	Resistance protein (Fragment) OS=Arachis cardenasii OX=51121 PE=4 SV=1				1.94088	1.62539	13.4335	3.16914	Chloroplast
Q2KPP7;Q2KPM7	19634.3	Resistance protein PRG (Fragment) OS=Arachis hypogaea OX=3818 PE=4 SV=1					2.02586			Cytoplasm
W5ZVX9	19679.3	Resistance protein (Fragment) OS=Arachis hypogaea OX=3818 PE=4 SV=1						3.79703		Chloroplast
W5ZVA4	19681.7	Resistance protein (Fragment) OS=Arachis hypogaea OX=3818 PE=4 SV=1					1.95554			Chloroplast
B4UWB7	19693.7	Latex-abundant protein (Fragment) OS=Arachis hypogaea OX=3818 PE=2 SV=1		2.17996			7.06388			Cytoplasm
N1NEU6	19739.4	Uncharacterized protein OS=Arachis duranensis OX=130453 GN=ARAX_ADH18B08-018 PE=4 SV=1	1.90621		2.22349			9.346		Chloroplast
Q2KPZ1;Q2KPY1	19752.5	Resistance protein PLTR (Fragment) OS=Arachis hypogaea OX=3818 PE=4 SV=1					4.10355			Cytoplasm
Q2KQ40	19755.3	Resistance protein PLTR (Fragment) OS=Arachis hypogaea OX=3818 PE=4 SV=1					4.10436		8.72298	Nucleus
B4XID4	19794.7	Ara h 7 allergen OS=Arachis hypogaea OX=3818 PE=2 SV=1		2.89247			2.09835		15.4728	Nucleus
Q2KQ35	19795.4	Resistance protein PLTR (Fragment) OS=Arachis hypogaea OX=3818 PE=4 SV=1		1.6663			24.3043			Cytoplasm
K7PQ81	19822.3	Flowering locus T OS=Arachis hypogaea OX=3818 GN=FT PE=2 SV=1			4.78627			2.58015	3.18667	Nucleus
H6U596	19826.5	Alcohol dehydrogenase (Fragment) OS=Arachis hypogaea OX=3818 PE=2 SV=1						3.75702		Cytoplasm
A0A290GK13	19827	Resistance protein (Fragment) OS=Arachis hypogaea OX=3818 PE=2 SV=1		2.0431	2.66307			9.031	11.1787	Nucleus
Q2KPZ3	19842.4	Resistance protein PLTR (Fragment) OS=Arachis hypogaea OX=3818 PE=4 SV=1	7.27247		8.00704		3.15021			Chloroplast
Q2KQ04	19895.8	Resistance protein PLTR (Fragment) OS=Arachis hypogaea OX=3818 PE=4 SV=1					5.41638	4.2936	2.53764	Cytoplasm
A0A0A6ZDT0	20099	Glyceraldehyde-3-phosphate dehydrogenase C2 OS=Arachis hypogaea OX=3818 PE=4 SV=1						2.80149		Cytoplasm
A0A0A6ZDP1;A0A0A6ZDT0	20101	Glyceraldehyde-3-phosphate dehydrogenase C2 OS=Arachis hypogaea OX=3818 PE=2 SV=1		2.03676	3.25948		2.11567	3.65822		Chloroplast
B4UW58	20106.9	DNA-binding with one finger 3 protein (Fragment) OS=Arachis hypogaea OX=3818 PE=2 SV=1					6.36601		9.95038	Nucleus
Q2KQ46	20114.3	Resistance protein PLTR (Fragment) OS=Arachis hypogaea OX=3818 PE=4 SV=1		2.62847		3.03097			9.5677	Cytoplasm
B4UWD4	20117.8	Putative mRNA export protein (Fragment) OS=Arachis hypogaea OX=3818 PE=2 SV=1	1.71774							Nucleus
C0L2V5	20129.3	Uncharacterized protein OS=Arachis hypogaea OX=3818 PE=4 SV=1						8.23044		Chloroplast
E2EAJ4	20158.3	Gigantea (Fragment) OS=Arachis diogoi OX=170720 PE=2 SV=1			2.22835				24.2145	Nucleus
Q2KPZ5	20159.1	Resistance protein PLTR (Fragment) OS=Arachis hypogaea OX=3818 PE=4 SV=1							10.204	Cytoplasm
B4UW74	20179.2	Fructokinase (Fragment) OS=Arachis hypogaea OX=3818 PE=2 SV=1					2.91612			Chloroplast
K7PQV2	20180.8	Flowering locus T-like protein OS=Arachis hypogaea OX=3818 GN=FTL PE=2 SV=1		3.26213	8.67351		4.10339			Nucleus
Q2KQ67	20191.2	Resistance protein PLTR (Fragment) OS=Arachis hypogaea OX=3818 PE=4 SV=1			2.9483			5.03509	24.2207	Cytoplasm
Q850G4	20213.3	Putative early light induced protein (Fragment) OS=Arachis hypogaea OX=3818 GN=Gsi-39 PE=2 SV=1			2.85325			2.83576		Chloroplast
Q2KPX9	20213.7	Resistance protein PLTR (Fragment) OS=Arachis hypogaea OX=3818 PE=4 SV=1					10.8647			Cytoplasm
Q2PXN7	20240.1	Chloroplast thioredoxin M-type (Fragment) OS=Arachis hypogaea OX=3818 PE=2 SV=1		2.21255	2.53416		2.27944	2.84424		Chloroplast
Q2KPY0;Q2KQ05;Q2KQ57	20287.2	Resistance protein PLTR (Fragment) OS=Arachis hypogaea OX=3818 PE=4 SV=1					1.95643	5.03631		Nucleus
B4UWE2	20315.4	Perchloric acid soluble translation inhibitor protein OS=Arachis hypogaea OX=3818 PE=2 SV=1					2.73734	4.94997	3.74013	Chloroplast
Q2KQ10	20331.2	Resistance protein PLTR (Fragment) OS=Arachis hypogaea OX=3818 PE=4 SV=1						10.5109	11.4854	Cytoplasm
A0A290G034	20346.3	Resistance protein (Fragment) OS=Arachis hypogaea OX=3818 PE=2 SV=1		2.41559	2.80275	5.61042	4.167		12.2453	Cell wall
B4UWA3	20377.2	Uncharacterized protein OS=Arachis hypogaea OX=3818 PE=2 SV=1					29.8186	16.3168		Cell membrane
Q0MX19	20378.1	Leucine rich protein OS=Arachis hypogaea OX=3818 PE=2 SV=1					29.8115	7.33697		Chloroplast
Q2KQ28	20437.5	Resistance protein PLTR (Fragment) OS=Arachis hypogaea OX=3818 PE=4 SV=1						12.519	33.3527	Cytoplasm
A0A2D1CQI3;K7PQU7;K7PQ82	20442.4	TFL1 OS=Arachis hypogaea OX=3818 GN=TFL1 PE=2 SV=1						6.52727		Cytoplasm
Q2KQ15;Q2KQ49	20465.1	Resistance protein PLTR (Fragment) OS=Arachis hypogaea OX=3818 PE=4 SV=1					2.92992		20.3042	Nucleus
B4UWC0	20558.4	Lipoxygenase 2 (Fragment) OS=Arachis hypogaea OX=3818 PE=2 SV=1			2.30854					Chloroplast
A0A290G009	20562.4	Resistance protein (Fragment) OS=Arachis hypogaea OX=3818 PE=2 SV=1					3.3898	8.9785	38.443	Nucleus
Q2KQ17;Q2KQ19;Q2KQ25	20631.2	Resistance protein PLTR (Fragment) OS=Arachis hypogaea OX=3818 PE=4 SV=1					2.73539			Cytoplasm
B4UW86	20671.6	Putative glycerophosphoryl diesterphosphodiesterase 2 (Fragment) OS=Arachis hypogaea OX=3818 PE=2 SV=1					3.38161			Golgi
H6U598	20675.6	Phosphatases pleiotropic regulator PRL1 (Fragment) OS=Arachis hypogaea OX=3818 PE=2 SV=1					5.33414	25.0371	8.07624	Nucleus
C0L2U5	20682.3	Putative endonuclease/exonuclease/phosphatase OS=Arachis hypogaea OX=3818 PE=4 SV=1			1.6049			11.3979		Peroxisomes
G9HPX7;E3JPR7	20723.8	ADP-ribosylation factor OS=Arachis hypogaea OX=3818 GN=ARF PE=2 SV=1						31.1195		Endoplasmic reticulum
Q2KQ53	20784.8	Resistance protein PLTR (Fragment) OS=Arachis hypogaea OX=3818 PE=4 SV=1					5.00291		51.6935	Chloroplast
Q2KPK4;Q2KPN2	20805.3	Resistance protein PRG (Fragment) OS=Arachis hypogaea OX=3818 PE=4 SV=1						3.59715	10.4004	Chloroplast
E3P863	20809.9	Putative arginine/serine-rich splicing factor OS=Arachis diogoi OX=170720 GN=DR-54 PE=2 SV=2	2.59227				10.403			Chloroplast
C0L2V8;C0L2U8	20879	Putative ADP-ribosylation factor OS=Arachis hypogaea OX=3818 PE=3 SV=1			3.7811				5.33978	Mitochondrion
H6U5A0	20893.8	Pto-like receptor kinase resistance protein (Fragment) OS=Arachis hypogaea OX=3818 PE=2 SV=1							56.5774	Cytoplasm
B4UW94	20911	Hyoscyamine 6 beta-hydroxylase (Fragment) OS=Arachis hypogaea OX=3818 PE=2 SV=1					3.30553			Cytoplasm
B4UWA8	20925	Hypoxanthine phosphoribosyltransferase OS=Arachis hypogaea OX=3818 PE=2 SV=1			1.80656					Cytoplasm
K0F414	20952.8	Ethylene-responsive element binding factor 2 OS=Arachis hypogaea OX=3818 GN=ERF2 PE=2 SV=1					3.76616			Cytoplasm
D8L209	20953.8	Putative receptor protein kinase (Fragment) OS=Arachis diogoi OX=170720 PE=2 SV=1	1.54923	5.90534	11.1078		9.83919	9.1926		Nucleus
A0A1L5JJJ5	21021.9	Late embryogenesis abundant protein 2 OS=Arachis ipaensis OX=130454 GN=LEA2 PE=2 SV=1			3.02374		3.31754	18.9248		Cytoplasm
Q2HNZ7	21068.5	Resistance protein Cre (Fragment) OS=Arachis hypogaea OX=3818 GN=CRE PE=4 SV=1		1.95284			3.6634	4.12384	16.5602	Cytoplasm
A0A061	21068.6	Lactoylglutathione lyase OS=Arachis hypogaea OX=3818 GN=GLYI PE=2 SV=2			2.14383		2.63058			Cytoplasm
N1NF34	21081.5	Putative C2 domain contatining protein OS=Arachis ipaensis OX=130454 GN=ARAX_AIPA147A20-007 PE=4 SV=1					5.79139			Cytoplasm
A0A290GJV6	21095.9	Resistance protein (Fragment) OS=Arachis hypogaea OX=3818 PE=2 SV=1					3.0652	8.7321		Chloroplast
Q2HNZ3;Q2HNZ9;Q2HP04;Q2HNZ5;Q2HNZ8;Q2HP00;Q2HP07;Q2HP08;Q2HP10;Q2HP11;Q2HP12;Q2HNZ6	21123.3	Resistance protein Cre (Fragment) OS=Arachis hypogaea OX=3818 GN=CRE PE=4 SV=1					5.98209	3.82357		Nucleus
Q2KPK9	21134.2	Resistance protein PRG (Fragment) OS=Arachis hypogaea OX=3818 PE=4 SV=1		1.9745	3.07665		1.58197			Cytoplasm
A0A191UJ69;A0A1C7D296	21153.1	ATP synthase subunit b_ chloroplastic OS=Arachis hypogaea OX=3818 GN=atpF PE=3 SV=1						3.40684		Chloroplast
P20780	21205.2	Arachin 21 kDa protein OS=Arachis hypogaea OX=3818 PE=1 SV=1							8.66664	Cell membrane
B4UW54	21223.4	GroES-like protein (Fragment) OS=Arachis hypogaea OX=3818 PE=2 SV=1					2.32848			Chloroplast
Q06H40;A0A343LN25	21445.6	Polyubiquitin 10 (Fragment) OS=Arachis hypogaea OX=3818 PE=2 SV=1							4.51539	Cytoplasm
A0A191UJ77	21496.3	Photosystem I assembly protein Ycf4 OS=Arachis hypogaea OX=3818 GN=ycf4 PE=3 SV=1							5.45439	Chloroplast
Q2HP03	21535.7	Resistance protein Cre (Fragment) OS=Arachis hypogaea OX=3818 GN=CRE PE=4 SV=1					1.71935			Cytoplasm
A0A290G079	21539.6	Resistance protein (Fragment) OS=Arachis hypogaea OX=3818 PE=2 SV=1					2.55344			Cytoplasm
B5LNQ2	21559.3	Pathogenesis-induced protein OS=Arachis hypogaea OX=3818 GN=PIP PE=2 SV=1					1.69815			Cytoplasm
B4UWD8	21580.6	NADP-dependent malic protein (Fragment) OS=Arachis hypogaea OX=3818 PE=2 SV=1			7.10655		3.11557		2.38364	Cytoplasm
A0A0I9QPT2	21592.6	L18 ribosomal protein Heart Stopper OS=Arachis hypogaea OX=3818 GN=Heart Stopper PE=2 SV=1					4.17228		3.98908	Chloroplast
A0A0D5Z9D0	21725.3	Germin-like protein 11 OS=Arachis hypogaea OX=3818 GN=GLP11 PE=2 SV=1					4.80448			Cell wall
Q06H36	21804.2	Thiamine biosynthetic enzyme (Fragment) OS=Arachis hypogaea OX=3818 PE=2 SV=1		12.3752	1.96034		6.0192	9.97532	30.3069	Mitochondrion
E3NYG9	21992.7	Uncharacterized protein (Fragment) OS=Arachis diogoi OX=170720 PE=2 SV=1		1.60876		2.74967	3.47905	13.192		Nucleus
B4UWA7	22036.2	Uncharacterized protein OS=Arachis hypogaea OX=3818 PE=2 SV=1							22.2517	Cytoplasm
B4UWB2	22093.2	Kunitz trypsin inhibitor 4 OS=Arachis hypogaea OX=3818 PE=2 SV=1					2.64984	4.05928		Vacuole
B4UWC3	22150.1	MADS box protein M8 (Fragment) OS=Arachis hypogaea OX=3818 PE=2 SV=1			3.837					Nucleus
H6U5A9	22151.6	Mitochondrial GTPase (Fragment) OS=Aspergillus flavus OX=5059 PE=2 SV=1	1.60217				7.76928		2.51636	Chloroplast
B6VB01	22245.4	Auxin binding protein 1 OS=Arachis hypogaea OX=3818 GN=ABP1 PE=2 SV=1					1.65318		3.58688	Endoplasmic reticulum
P04149	22276.6	Arachin 25 kDa protein OS=Arachis hypogaea OX=3818 PE=1 SV=1			1.93905		6.96293	5.14721		Chloroplast
N1NFT1	22344	Uncharacterized protein OS=Arachis duranensis OX=130453 GN=ARAX_ADH035P21-002 PE=4 SV=1			2.43554					Nucleus
M4SZY9	22346.8	Ethylene-responsive transcription factor OS=Arachis hypogaea OX=3818 GN=ERF PE=2 SV=1	1.64043	2.03428		66.1551	9.37847	17.6894	7.89273	Nucleus
C6ZGE3	22362.4	Lipoxygenase (Fragment) OS=Arachis diogoi OX=170720 PE=2 SV=1			3.2026			38.7472		Nucleus
N1NFU1	22370.2	Uncharacterized protein OS=Arachis duranensis OX=130453 GN=ARAX_ADH18B08-017 PE=4 SV=1						4.59024		Chloroplast
B4UWA1	22397.8	Lactoylglutathione lyase (Fragment) OS=Arachis hypogaea OX=3818 PE=2 SV=1		2.81434				6.57115		Nucleus
H6U5A4	22442.6	DSB repair complex subunit Ku70 (Fragment) OS=Aspergillus flavus OX=5059 PE=2 SV=1			6.6401		6.39861			Nucleus
N1NFY0	22480.9	Putative endonuclease/exonuclease/phosphatase OS=Arachis duranensis OX=130453 GN=ARAX_ADH079023-072J06-007 PE=4 SV=1	1.52427				4.69293	2.97348		Nucleus
V5T709	22490	Putative MYB-related protein 17 OS=Arachis hypogaea OX=3818 GN=MYB17 PE=4 SV=1					3.6014		2.42834	Nucleus
V5T7W6	22508.4	Putative R2R3 MYB protein 8 OS=Arachis hypogaea OX=3818 GN=MYB8 PE=4 SV=1		2.09756						Nucleus
E2DDA3	22558.9	Putative mitochondrial cytochrome P450 monooxygenase (Fragment) OS=Arachis diogoi OX=170720 PE=2 SV=1					1.69496			Endoplasmic
E5FHY7	22581.7	Late embryogenesis abundant protein group 3 protein OS=Arachis hypogaea OX=3818 GN=LEA3-5 PE=2 SV=1					3.16468	17.1537	1.8021	Nucleus
N1NKG4	22605.6	Uncharacterized protein OS=Arachis duranensis OX=130453 GN=ARAX_ADH179B13-001 PE=4 SV=1	6.17017							Nucleus
Q45W75	22788.4	Dirigent protein OS=Arachis hypogaea OX=3818 PE=2 SV=1					2.60751			Extracellular region
N1NJM5	22811.9	Uncharacterized protein OS=Arachis hypogaea OX=3818 GN=ARAX_AHF417E07-002 PE=4 SV=1					6.74498	3.03398	7.23135	Nucleus
A0A290GKB8	22917.1	Resistance protein (Fragment) OS=Arachis hypogaea OX=3818 PE=2 SV=1		8.46713	2.71611					Cytoplasm
A0A290GKB8	22917.1	Resistance protein (Fragment) OS=Arachis hypogaea OX=3818 PE=2 SV=1					3.14841	2.19908		Cytoplasm
A7LIS6	23092.6	Germin-like protein subfamily 2 member 1 OS=Arachis hypogaea OX=3818 GN=OxOxl PE=2 SV=1			1.56445			3.73284		Exacell.
B4UWB4	23150.9	Lactoylglutathione lyase (Fragment) OS=Arachis hypogaea OX=3818 PE=2 SV=1					1.88402	4.26139	5.12103	Cytoplasm
E4W7U9	23162.8	TINY transcription factor OS=Arachis hypogaea OX=3818 GN=TINY-binding domain PE=2 SV=1		1.92745			6.93084	1.55344		Cytoplasm
E3NYH0	23189.4	Asparagine synthetase (Fragment) OS=Arachis diogoi OX=170720 PE=2 SV=1					3.00289	1.80243		Cytoplasm
A0A290GK72	23244.4	Resistance protein (Fragment) OS=Arachis hypogaea OX=3818 PE=2 SV=1							14.5793	Cytoplasm
N1NF39;N1NKK0	23255.8	Putative fatty acid elongase OS=Arachis duranensis OX=130453 GN=ARAX_ADH068E04-004 PE=4 SV=1						24.7251	11.263	Extracellular matrix
T1Q4F6	23265.3	Yellow stripe-like transporter 6 (Fragment) OS=Arachis hypogaea OX=3818 GN=YSL6 PE=2 SV=1					1.68635			Vacuole
A0A290G0E0	23329.8	Resistance protein (Fragment) OS=Arachis hypogaea OX=3818 PE=2 SV=1			4.10592					Chloroplast
A0A290G0E0	23329.8	Resistance protein (Fragment) OS=Arachis hypogaea OX=3818 PE=2 SV=1					17.3518	5.98396	39.0982	Chloroplast
A0A191UJ55	23336.2	30S ribosomal protein S4_ chloroplastic OS=Arachis hypogaea OX=3818 GN=rps4 PE=3 SV=1		5.41246				17.8527	25.9108	Chloroplast
M1FT17	23398.2	Small GTP binding protein OS=Arachis hypogaea OX=3818 PE=4 SV=1		4.49017			3.25972	1.76634	2.29617	Vacuole
N1NKC9;N1NJN8	23466.9	Proteasome subunit OS=Arachis duranensis OX=130453 GN=ARAX_ADH035P21-014 PE=4 SV=1					2.11889			Cytoplasm
G3LT02	23472.7	Chalcone-flavonone isomerase family protein OS=Arachis hypogaea OX=3818 GN=Chi PE=2 SV=1		2.26998	3.02671		9.03301	1.72332	16.1828	Chloroplast
E6Y9A5	23536.4	Beta-hydroxyacyl-ACP dehydratase OS=Arachis hypogaea OX=3818 GN=HD PE=2 SV=1					7.95906			Chloroplast
D4NXQ0;A7LIS5	23562.2	Germin-like protein subfamily 3 member 3 OS=Arachis hypogaea OX=3818 GN=GLP1 PE=2 SV=1						5.45527		Cell wall
A0A290GK88	23577.3	Resistance protein (Fragment) OS=Arachis hypogaea OX=3818 PE=2 SV=1					1.61029	2.87146		Cell wall
N1NJN8	23677.2	Proteasome subunit OS=Arachis hypogaea OX=3818 GN=ARAX_AHF417E07-015 PE=4 SV=1		3.7401						Cytoplasm
E2EAZ8;E2DQY7	23757.3	Granule-bound glycogen synthase (Fragment) OS=Arachis diogoi OX=170720 PE=2 SV=1			2.34053					Cytoplasm
Q06H37	23851	Syringolide-induced protein 19-1-5 (Fragment) OS=Arachis hypogaea OX=3818 PE=2 SV=1					8.79424			Extracellular matrix
Q45W70	23962.7	Isomerase-like protein OS=Arachis hypogaea OX=3818 PE=2 SV=1		2.70051	3.30784	4.09729	4.70579	14.4639	28.1759	Chloroplast
A0A0H3Y991	24023.2	Wuschel-related homeobox 13B1 OS=Arachis hypogaea OX=3818 GN=WOX13B2 PE=2 SV=1				3.00263	1.81444			Nucleus
D8KXZ5	24084	Beta-hydroxyacyl-ACP dehydrase 1 OS=Arachis hypogaea OX=3818 GN=HD1 PE=2 SV=1	4.93197					8.081		Chloroplast
C0L2V3	24097.9	Putative phosphoglycerate dehydrogenase (Fragment) OS=Arachis hypogaea OX=3818 PE=4 SV=1			7.65356	3.5756			21.7104	Chloroplast
A1DZF1	24141.7	Arachin 7 (Fragment) OS=Arachis hypogaea OX=3818 PE=2 SV=1						5.30065		Vacuole
Q1PCR5	24161.2	20S proteasome beta subunit (Fragment) OS=Arachis hypogaea OX=3818 PE=2 SV=1					6.58156	18.9988		Cytoplasm
A0A290G096	24169.5	Resistance protein (Fragment) OS=Arachis hypogaea OX=3818 PE=2 SV=1			1.58953		2.82369			Nucleus
A0A0H3Y7V8	24249.5	Wuschel-related homeobox 13A OS=Arachis hypogaea OX=3818 GN=WOX13A PE=2 SV=1	1.77964				3.71314	7.22982		Nucleus
A0A0A6ZDR7	24325.2	Ribosomal protein L15 OS=Arachis hypogaea OX=3818 PE=2 SV=1							3.07462	Chloroplast
A0A290G4T4	24386.1	Resistance protein (Fragment) OS=Arachis hypogaea OX=3818 PE=2 SV=1			3.69014			27.7982		Chloroplast
B4UW79	24413.8	Glutathione peroxidase (Fragment) OS=Arachis hypogaea OX=3818 PE=2 SV=1			4.31542		4.9859			Mitochondrion
N1NFX1	24415.9	Uncharacterized protein OS=Arachis duranensis OX=130453 GN=ARAX_ADH51I17-83F22-001 PE=4 SV=1					2.08991	95.1881	18.0357	Mitochondrion
Q0MX20	24551.7	Serine rich protein OS=Arachis hypogaea OX=3818 PE=2 SV=1						20.4072	7.83877	Plasma membrane
B4UW57	24667.1	Putative dihydroflavonol reductase (Fragment) OS=Arachis hypogaea OX=3818 PE=2 SV=1	1.67044							Chloroplast
V5T8H8	24694.9	Putative R2R3 MYB protein 2 OS=Arachis hypogaea OX=3818 GN=MYB2 PE=4 SV=1							16.5062	Nucleus
Q6YDC8	24725.9	Resistance protein (Fragment) OS=Arachis cardenasii OX=51121 PE=4 SV=1	1.7096							Cytoplasm
A0A0B5HFJ9;A0A0B5HBM1	24785.4	Chalcone-flavonone isomerase family protein OS=Arachis hypogaea OX=3818 GN=CHI-II PE=3 SV=1	1.54426				11.5115	8.53454	10.588	Cytoplasm
E4W7V3	24795.6	Putative DREB transcription factor OS=Arachis hypogaea OX=3818 GN=DRE-binding domain PE=2 SV=1	1.91489		9.65345		7.70885	2.05106	6.50823	Nucleus
M4SZZ4	24798.9	Nuclear transcription factor Y subunit A-3 OS=Arachis hypogaea OX=3818 GN=NF-YA3 PE=2 SV=1		2.02833						Nucleus
M4SZZ4;M4T0U6	24798.9	Nuclear transcription factor Y subunit A-3 OS=Arachis hypogaea OX=3818 GN=NF-YA3 PE=2 SV=1					20.4488			Nucleus
A0A290GED5	24819.3	Resistance protein (Fragment) OS=Arachis hypogaea OX=3818 PE=2 SV=1					2.78975	17.06		Nucleus
A0A0D5Z9C4	24834.4	Germin-like protein 10 OS=Arachis hypogaea OX=3818 GN=GLP10 PE=2 SV=1						7.58467	10.5079	Cell wall
A0A068VVA2	24854.4	Ca2+hinding-protein (Fragment) OS=Arachis hypogaea OX=3818 GN=AhSOS3 PE=4 SV=1		2.13975	2.27305		8.15355	6.53425		Cell membrane
C7F8A3	24878.2	Glutathione S-transferase OS=Arachis hypogaea OX=3818 GN=GST PE=2 SV=1			1.59192		16.7078			Cytoplasm
Q6KBB0	24928.8	Putative inorganic pyrophosphatase OS=Arachis hypogaea OX=3818 GN=pah767 PE=2 SV=1							26.0739	Cytoplasm
A0A290G0C3	24935.7	Resistance protein (Fragment) OS=Arachis hypogaea OX=3818 PE=2 SV=1				2.34943	11.7139			Chloroplast
E2DZJ9	24991	Putative amine oxidase (Fragment) OS=Arachis diogoi OX=170720 PE=2 SV=1			4.70652		1.92992			Chloroplast
A0A290G0B4	25002.2	Resistance protein (Fragment) OS=Arachis hypogaea OX=3818 PE=2 SV=1	13.3517		2.17268	3.5909	10.3308	13.7337		Nucleus
B4UW87	25017.1	Glycosyltransferase (Fragment) OS=Arachis hypogaea OX=3818 PE=2 SV=1							7.51013	Cytoplasm
Q6YDE0	25032.6	Resistance protein (Fragment) OS=Arachis cardenasii OX=51121 PE=4 SV=1						37.1187	13.6378	Nucleus
M4T2P8	25055.1	F-box family protein 6 (Fragment) OS=Arachis hypogaea OX=3818 PE=2 SV=1	2.54775						25.5609	Chloroplast
N1NEV8	25064.1	Uncharacterized protein OS=Arachis duranensis OX=130453 GN=ARAX_ADH035P21-010 PE=4 SV=1					4.61176			Nucleus
A0A290GI11	25087.6	Resistance protein (Fragment) OS=Arachis hypogaea OX=3818 PE=2 SV=1		18.9363	1.6719	4.58213				Nucleus
A0A290GI11	25087.6	Resistance protein (Fragment) OS=Arachis hypogaea OX=3818 PE=2 SV=1					5.3886		11.4495	Nucleus
B4UW62	25138.4	Embryo-abundant protein EMB (Fragment) OS=Arachis hypogaea OX=3818 PE=2 SV=1	2.69584		5.64118			28.6036		Chloroplast
B1PS48	25140.5	Zinc finger protein ZFP248 OS=Arachis hypogaea OX=3818 PE=2 SV=1					3.6101			Nucleus
Q06H26	25257.6	Tumor-related protein-like (Fragment) OS=Arachis hypogaea OX=3818 PE=2 SV=1		1.60268	2.97551		2.21502			Nucleus
B4UW85	25340.4	Putative glycerate dehydrogenase (Fragment) OS=Arachis hypogaea OX=3818 PE=2 SV=1					2.31648			Mitochondrion
V5IWM4	25349.7	Putative CBF-like protein OS=Arachis hypogaea OX=3818 GN=CBL PE=2 SV=1			2.74778			1.96415		Nucleus
N1NFS0	25367.8	Putative FAD_binding domain containing protein OS=Arachis duranensis OX=130453 GN=ARAX_ADH18B08-019 PE=4 SV=1					2.63179		12.6631	Vacuole
N1NG07	25413.5	Uncharacterized protein OS=Arachis hypogaea OX=3818 GN=ARAX_AHF417E07-010 PE=4 SV=1							10.2003	Nucleus
A0A290GKH1	25449.2	Resistance protein (Fragment) OS=Arachis hypogaea OX=3818 PE=2 SV=1			12.2403		2.95868	25.623	15.9932	Cytoplasm
B4UWB5	25453.9	L-asparaginase (Fragment) OS=Arachis hypogaea OX=3818 PE=2 SV=1			2.46989		7.25523	11.2037		Mitochondrion
D6C529	25463.4	Leafy cotyledon 1-B OS=Arachis hypogaea OX=3818 GN=LEC1-B PE=2 SV=1	2.75472				2.64539			Nucleus
E3NYG3	25543.4	Cinnamic acid 4-hydroxylase (Fragment) OS=Arachis diogoi OX=170720 PE=2 SV=1				2.08849	3.83261			Endoplasmic reticulum
Q6YDC9;Q6YDD0;Q6YDD7;Q6YDE4	25558.5	Resistance protein (Fragment) OS=Arachis cardenasii OX=51121 PE=4 SV=1						7.30812		Cytoplasm
V5T684	25583.7	Putative R2R3 MYB protein 9 OS=Arachis hypogaea OX=3818 GN=MYB9 PE=4 SV=1	1.55297		2.39383		3.31381			Nucleus
D6C528;A0A0C5K1J5	25642.5	Leafy cotyledon 1-A OS=Arachis hypogaea OX=3818 GN=LEC1-A PE=2 SV=1							3.20553	Cytoplasm
Q6YDD7;Q6YDE4	25715.6	Resistance protein (Fragment) OS=Arachis cardenasii OX=51121 PE=4 SV=1							65.1829	Cytoplasm
B4UWD1	25780.8	Putative metal ion-binding protein (Fragment) OS=Arachis hypogaea OX=3818 PE=2 SV=1	6.95566				5.22952		2.51501	Nucleus
A0A0A6ZDS5;A0A0A6ZDY5	25806.4	Nucleoside diphosphate kinase OS=Arachis hypogaea OX=3818 PE=2 SV=1					3.2412		94.7205	Chloroplast
A0A290G0E6	25815.4	Resistance protein (Fragment) OS=Arachis hypogaea OX=3818 PE=2 SV=1					6.52323			Chloroplast
B4UW55	25873.1	CYP735A1 (Fragment) OS=Arachis hypogaea OX=3818 PE=2 SV=1					2.80227	4.03774		Endoplasmic reticulum
G0Y6V3	25899.6	Uncharacterized protein OS=Arachis hypogaea OX=3818 GN=205D04_3 PE=4 SV=1			1.63767		2.04253			Nucleus
A0A1C7D2M9	25910.5	NAD(P)H-quinone oxidoreductase subunit K_ chloroplastic OS=Arachis hypogaea OX=3818 GN=ndhK PE=3 SV=1		2.92062						Chloroplast
Q5PXR2	25912.6	Resistance protein-like protein (Fragment) OS=Arachis cardenasii OX=51121 PE=4 SV=1	1.65115	2.25069	3.54083		2.07938	4.00575		Cytoplasm
A0A191UJ91;A0A1C7D2T5	25916.5	Cytochrome b6 OS=Arachis hypogaea OX=3818 GN=petB PE=3 SV=1					2.06875			Plasma membrane
B4UW91	25919	Putative heat shock protein 4 (Fragment) OS=Arachis hypogaea OX=3818 PE=2 SV=1	3.34449				2.82964			Chloroplast
Q43375	26156.2	Galactose-binding lectin (Fragment) OS=Arachis hypogaea OX=3818 GN=lec PE=2 SV=2					3.55982		5.09019	Cytoplasm
A0A290GJR7	26305.2	Resistance protein (Fragment) OS=Arachis hypogaea OX=3818 PE=2 SV=1			1.60846	30.873			45.7623	Cell wall
B4UW69	26565.6	Far-red impaired response protein (Fragment) OS=Arachis hypogaea OX=3818 PE=2 SV=1		1.53384				21.4603		Nucleus
B4UW49	26613.6	Putative lipase (Fragment) OS=Arachis hypogaea OX=3818 PE=2 SV=1				1.58323				Chloroplast
B4UWB9	26794.5	Lipoxygenase 1 (Fragment) OS=Arachis hypogaea OX=3818 PE=2 SV=1			7.97299		4.03451	12.7362		Cytoplasm
A0A290GKC3	26846.7	Resistance protein (Fragment) OS=Arachis hypogaea OX=3818 PE=2 SV=1			3.47525		1.6061		1.78985	Cell membrane
A0A0R4UXP5	26880.4	Fatty acid hydroxylase OS=Arachis hypogaea OX=3818 GN=fah PE=2 SV=1		4.2395						Cytoplasm
Q84TU2	26973.6	Subtilisin-like seed-specific protein (Fragment) OS=Arachis hypogaea OX=3818 PE=2 SV=1					2.44763	11.6931		Cell membrane
Q45W81;A1Z1T1	27004.6	Cytosolic ascorbate peroxidase OS=Arachis hypogaea OX=3818 PE=2 SV=1						6.46548		Cytoplasm
Q5I212	27064.6	Putative root-knot resistance protein OS=Arachis hypogaea OX=3818 PE=2 SV=1		1.83765			7.69054	3.26389	16.1089	Nucleus
A1Z1T1;Q45W81	27107.7	Cytosolic ascorbate peroxidase OS=Arachis hypogaea OX=3818 GN=APX PE=2 SV=1					5.65463	3.18587	6.67096	Cytoplasm
B4UW53	27128.5	Integrase (Fragment) OS=Arachis hypogaea OX=3818 PE=2 SV=1					24.6042		13.7293	Chloroplast
A0A191UJ73	27154.4	30S ribosomal protein S2_ chloroplastic OS=Arachis hypogaea OX=3818 GN=rps2 PE=3 SV=1					1.52905	3.58749	1.65104	Chloroplast
V5T6N4	27204.8	Putative R2R3 MYB protein 1 OS=Arachis hypogaea OX=3818 GN=MYB1 PE=4 SV=1	4.7328							Nucleus
A0A0A6ZDX8	27233.8	40S ribosomal protein S3 OS=Arachis hypogaea OX=3818 PE=2 SV=1					2.14933	4.70222	2.64836	Cytoplasm
A0A290G0C0	27273.1	Resistance protein (Fragment) OS=Arachis hypogaea OX=3818 PE=2 SV=1					8.5062			Nucleus
A0A0U3E0B1	27412.5	Phosphatidyl inositol phosphate kinase OS=Arachis hypogaea OX=3818 GN=PIPK1 PE=2 SV=1		1.97553	4.67541		1.5825		1.90511	Chloroplast
Q6YDD6	27420.3	Resistance protein (Fragment) OS=Arachis cardenasii OX=51121 PE=4 SV=1					7.75891	4.23804	13.2102	Cytoplasm
E5FHZ2	27426.7	Late embryogenesis abundant protein group 5 protein OS=Arachis hypogaea OX=3818 GN=LEA5-2 PE=2 SV=1		3.249			3.14672			Cytoplasm
I3XP93;I3XP87	27430.3	Ribulose-1_5-bisphosphate carboxylase/oxygenase large subunit (Fragment) OS=uncultured bacterium OX=77133 GN=cbbL PE=4 SV=1	2.19809					10.1014		Chloroplast
B4UW64	27455.4	Epoxide hydrolase (Fragment) OS=Arachis hypogaea OX=3818 PE=2 SV=1		2.44193			3.61678		4.2793	Chloroplast
C0L2U0	27571.6	Putative cyclase family protein OS=Arachis hypogaea OX=3818 PE=4 SV=1					2.36645			Extracellular region
J9QGM3	27683.4	Chalcone-flavonone isomerase family protein OS=Arachis hypogaea OX=3818 GN=CHI-I PE=2 SV=1			4.52591					Chloroplast
B4UWD6	27691.9	Myosin XI (Fragment) OS=Arachis hypogaea OX=3818 PE=2 SV=1						2.90294		Chloroplast
A0A290GKI6	27724.8	Resistance protein (Fragment) OS=Arachis hypogaea OX=3818 PE=2 SV=1					1.77341		9.66245	Chloroplast
V5T7W3	27807.3	Putative R2R3 MYB protein 3 OS=Arachis hypogaea OX=3818 GN=MYB3 PE=4 SV=1						1.55626	2.81683	Nucleus
A0A290G559;A0A290G000	27836.4	Resistance protein (Fragment) OS=Arachis hypogaea OX=3818 PE=2 SV=1					4.94112			Nucleus
A0A290GEM8	27918	Resistance protein (Fragment) OS=Arachis hypogaea OX=3818 PE=2 SV=1					2.25642	6.05006		Nucleus
Q09GR6	27950.8	MADS-box transcription factor OS=Arachis hypogaea OX=3818 PE=2 SV=1			2.84906		2.66864		3.61859	Nucleus
A0A290G0G6	27970.5	Resistance protein (Fragment) OS=Arachis hypogaea OX=3818 PE=2 SV=1						3.54096		Cell wall
A0A290GIB2	28106	Resistance protein (Fragment) OS=Arachis hypogaea OX=3818 PE=2 SV=1					1.70746	3.49543		Cell wall
A0A1N7TA48	28187	Phosphomannomutase OS=Arachis hypogaea OX=3818 PE=2 SV=1		1.64695	2.86361	3.15235	1.74824			Cytoplasm
Q43376	28202.1	Mannose/glucose-binding lectin (Fragment) OS=Arachis hypogaea OX=3818 GN=lec PE=2 SV=1			3.29084			18.5673	11.9268	Nucleus
H6U599	28297.2	Receptor serine/threonine kinase (Fragment) OS=Arachis hypogaea OX=3818 PE=2 SV=1			1.70138	7.23868			19.2549	Nucleus
I3XPB4	28342.3	Ribulose-1_5-bisphosphate carboxylase/oxygenase large subunit (Fragment) OS=uncultured bacterium OX=77133 GN=cbbL PE=4 SV=1					1.79165	8.68216		Chloroplast
A0A290G0J7	28371.7	Resistance protein (Fragment) OS=Arachis hypogaea OX=3818 PE=2 SV=1					8.87039			Cell wall
Q43377	28389.3	Mannose/glucose-binding lectin (Fragment) OS=Arachis hypogaea OX=3818 GN=lec PE=2 SV=1			10.1334			26.1497	28.9472	Vacuole
E9LFE8	28404.3	11S arachin (Fragment) OS=Arachis hypogaea OX=3818 PE=2 SV=1						4.63075	3.63788	Vacuole
A0A1S6WN74	28464.9	Expansin-like B8 (Fragment) OS=Arachis batizocoi OX=108210 GN=EXLB8 PE=2 SV=1							11.8063	Extracellular matrix
E9LFE9	28528.6	11S arachin OS=Arachis hypogaea OX=3818 PE=2 SV=1					2.51389	4.10165	14.0844	Chloroplast
A0A1S6WN66;A0A1S6WN77;A0A1S6WN81;A0A1S6WN85;A0A1S6WN92;A0A1S6WN98	28638	Expansin-like B8 OS=Arachis duranensis OX=130453 GN=EXLB8 PE=2 SV=1							25.5638	Extracellular matrix
I3XPC1	28674.7	Ribulose-1_5-bisphosphate carboxylase/oxygenase large subunit (Fragment) OS=uncultured bacterium OX=77133 GN=cbbL PE=4 SV=1	3.15558	31.1265	2.23216		5.24538	2.7693		Cytoplasm
V5T6P8	28826.7	Putative MYB-related protein 18 OS=Arachis hypogaea OX=3818 GN=MYB18 PE=4 SV=1					2.07296	2.0941		Nucleus
I3XP92	29066.2	Ribulose-1_5-bisphosphate carboxylase/oxygenase large subunit (Fragment) OS=uncultured bacterium OX=77133 GN=cbbL PE=4 SV=1							15.5902	Clhroplast
Q06H27	29115	Tryptophan synthase alpha chain (Fragment) OS=Arachis hypogaea OX=3818 PE=2 SV=1	1.96612	2.27696			1.94445			Chloroplast
Q42515	29437.6	Chitinase (Class II) OS=Arachis hypogaea OX=3818 GN=chi2;2 PE=2 SV=1			4.95938					Vacuole
E6Y6Q7;E6Y6Q8	29520.8	Biotin carboxyl carrier protein of acetyl-CoA carboxylase OS=Arachis hypogaea OX=3818 GN=BCCP1-1 PE=2 SV=1						1.87203		Chloroplast
A0A290G0C9	29569.9	Resistance protein (Fragment) OS=Arachis hypogaea OX=3818 PE=2 SV=1						11.4475	13.2389	Nucleus
Q43373	29623.3	Galactose-binding lectin OS=Arachis hypogaea OX=3818 GN=lec PE=2 SV=1			2.40727		1.6572			Cytoplasm
I3XPA7	29641	Ribulose-1_5-bisphosphate carboxylase/oxygenase large subunit (Fragment) OS=uncultured bacterium OX=77133 GN=cbbL PE=4 SV=1							3.99923	Chloroplast
A0A290G0K7	29728.2	Resistance protein (Fragment) OS=Arachis hypogaea OX=3818 PE=2 SV=1	1.91225	2.64803	1.80604		14.3141	2.51035		Cytoplasm
I3XPA6	29808.1	Ribulose-1_5-bisphosphate carboxylase/oxygenase large subunit (Fragment) OS=uncultured bacterium OX=77133 GN=cbbL PE=4 SV=1					3.01307		3.70027	Cytoplasm
A0A290GK29	29875.4	Resistance protein (Fragment) OS=Arachis hypogaea OX=3818 PE=2 SV=1					5.1772			Cell wall
A0A191UJA7;A0A191UJD3;A0A1C7D2T7	29958.5	50S ribosomal protein L2_ chloroplastic OS=Arachis hypogaea OX=3818 GN=rpl2 PE=3 SV=1		3.89368						Cytoplasm
M4WTB0	29993.1	Cytochrome c oxidase subunit 3 OS=Arachis hypogaea OX=3818 GN=cox3 PE=3 SV=1						18.0067		Plasma membrane
A0A290G0F8	30021.4	Resistance protein (Fragment) OS=Arachis hypogaea OX=3818 PE=2 SV=1					6.67401		10.6437	Cell membrane
B5AK52	30030.8	NAC-like transcription factor OS=Arachis hypogaea OX=3818 GN=NAC2 PE=2 SV=1	2.95923	5.83464			8.37553			Nucleus
A0A191UJD3;A0A191UJA7;A0A1C7D2T7	30059.6	50S ribosomal protein L2_ chloroplastic OS=Arachis hypogaea OX=3818 GN=rpl2 PE=3 SV=1			5.32679	2.19524				Cytoplasm
I3XPC4	30060.2	Ribulose-1_5-bisphosphate carboxylase/oxygenase large subunit (Fragment) OS=uncultured bacterium OX=77133 GN=cbbL PE=4 SV=1			1.98432			9.29412		Chloroplast
C0L2U3	30131.7	Putative cyclase family protein OS=Arachis hypogaea OX=3818 PE=4 SV=1		2.45907			2.15196			Extracellular region
I3XPB6	30177.3	Ribulose-1_5-bisphosphate carboxylase/oxygenase large subunit (Fragment) OS=uncultured bacterium OX=77133 GN=cbbL PE=4 SV=1						5.54851	2.98482	Chloroplast
I3XPD0;I3XPD2;I3XPC9	30246.5	Ribulose-1_5-bisphosphate carboxylase/oxygenase large subunit (Fragment) OS=uncultured bacterium OX=77133 GN=cbbL PE=4 SV=1	2.83992	1.7469	8.78432	2.95918		2.27355		Cytoplasm
C0L2V2	30334.9	Putative cyclase family protein OS=Arachis hypogaea OX=3818 PE=4 SV=1	8.3532							Chlroplast
N1NKJ2	30393	Mediator of RNA polymerase II transcription subunit 31 OS=Arachis ipaensis OX=130454 GN=ARAX_AIPA147A20-017 PE=3 SV=1						2.19005		Nucleus
M4TG02;M4T2N8	30479.3	Auxin signaling F-box 3 (Fragment) OS=Arachis hypogaea OX=3818 GN=AFB3 PE=2 SV=1			3.38439					Nucleus
A0A0K0KBG7	30612	Chalcone-flavonone isomerase family protein OS=Arachis hypogaea OX=3818 GN=CHI2 PE=2 SV=1			1.66034		8.46546	3.93007	4.87275	Cell membrane
Q70DJ5	30765.3	Alpha-methyl-mannoside-specific lectin OS=Arachis hypogaea OX=3818 PE=1 SV=1							16.2923	Cytoplasm
A0A290G047	30819.9	Resistance protein (Fragment) OS=Arachis hypogaea OX=3818 PE=2 SV=1					2.00407			Nucleus
Q43322;D8V5S2	30966.6	Chitinase (Class II) OS=Arachis hypogaea OX=3818 GN=chi2;1 PE=4 SV=1							5.27286	Extracellular matrix
A0A290GJY7	30992.1	Resistance protein (Fragment) OS=Arachis hypogaea OX=3818 PE=2 SV=1						2.52083	23.0846	Cell wall
A0A217FAR5	31020.8	Prephenate dehydrogenase OS=Arachis hypogaea OX=3818 GN=PDH PE=2 SV=1			1.67054		2.1833	4.85076		Chloroplast
T2BAV2	31031.8	Ribosome recycling factor OS=Arachis hypogaea OX=3818 GN=RRF PE=2 SV=1		1.5782					3.22374	Chloroplast
A0A290G0G8	31067.5	Resistance protein (Fragment) OS=Arachis hypogaea OX=3818 PE=2 SV=1		2.08869	8.06206		11.6754	6.08606	1.97752	Cell wall
A0A1G4	31095.7	Mannose/glucose-binding lectin OS=Arachis hypogaea OX=3818 GN=lec1 PE=3 SV=1							46.1044	Vacuole
A0A1K4	31157.9	Mannose/glucose-binding lectin OS=Arachis hypogaea OX=3818 GN=lec PE=3 SV=1		3.86219						Vacuole
A0A290GKD8	31224.9	Resistance protein (Fragment) OS=Arachis hypogaea OX=3818 PE=2 SV=1		10.1536	14.8056	2.25888			17.4324	Chlroplast
A1E2B1	31495.8	11S seed storage globulin B2 OS=Arachis hypogaea OX=3818 PE=2 SV=1		1.9911			2.81085	3.49356	2.87059	Vacuole
C0L2U1	31554.2	Putative cyclase family protein OS=Arachis hypogaea OX=3818 PE=4 SV=1		4.39087	3.96535				2.7883	Extracellular region
A0A290GK97	31619.2	Resistance protein (Fragment) OS=Arachis hypogaea OX=3818 PE=2 SV=1					1.79029	4.76846	5.90258	Cell wall
A0A1L5JJI4	32416.5	Late embryogenesis abundant protein 3 OS=Arachis hypogaea OX=3818 GN=LEA3 PE=2 SV=1						10.4196	1.74761	Cell wall
V5T692	32434.8	Putative MYB-related protein 21 OS=Arachis hypogaea OX=3818 GN=MYB21 PE=3 SV=1							1.71744	Nucleus
V5T8J4	32744.4	Putative MYB-related protein 29 OS=Arachis hypogaea OX=3818 GN=MYB29 PE=4 SV=1		1.91487			1.63599	10.2363		Nucleus
A0A290G4Y2	32773.6	Resistance protein (Fragment) OS=Arachis hypogaea OX=3818 PE=2 SV=1					5.15715			Nucleus
A0A1L1VTR5;Q06H33;V5T6N9	32835.5	MYB-like transcript factor 6 OS=Arachis hypogaea OX=3818 GN=MYBL6 PE=2 SV=1			3.73465			4.96927		Nucleus
N1NJG9	32941.1	Putative D-arabinono-1_4-lactone oxidase OS=Arachis duranensis OX=130453 GN=ARAX_ADH18B08-001 PE=4 SV=1					2.58104			Chloroplast
V5T7W9	33006.7	Putative MYB-related protein 14 OS=Arachis hypogaea OX=3818 GN=MYB14 PE=4 SV=1							19.0913	Nucleus
A0A0U3DHM7	33026.2	Inositol polyphosphate multikinase (Fragment) OS=Arachis hypogaea OX=3818 GN=IPK2 PE=2 SV=1			1.97386		1.502	10.8603		Chloroplast
A0A290GKA2	33036.7	Resistance protein (Fragment) OS=Arachis hypogaea OX=3818 PE=2 SV=1					6.54539	14.9444	20.9363	Nucleus
C0L2V6	33050.1	Uncharacterized protein OS=Arachis hypogaea OX=3818 PE=4 SV=1					2.00173		3.87808	Nucleus
V5T6Q3	33135	Putative MYB-related protein 23 OS=Arachis hypogaea OX=3818 GN=MYB23 PE=3 SV=1		1.77453				1.74085		Nucleus
H9L792	33476	CDP-diacylglycerol-glycerol-3-phosphate 3-phosphatidyltransferase OS=Arachis hypogaea OX=3818 GN=PGP1 PE=2 SV=1			6.03142				1.91718	Chloroplast
N1NF20	33507.4	Putative cellulose synthase OS=Arachis ipaensis OX=130454 GN=ARAX_AIPA147A20-013 PE=4 SV=1			1.9901		1.97172	6.73347	3.00168	Nucleus
V5T688	33559.4	Putative MYB-related protein 16 OS=Arachis hypogaea OX=3818 GN=MYB16 PE=4 SV=1		1.57852	4.19448		3.54099			Nucleus
A0A290GK04;A0A290FZX0	33648.5	Resistance protein (Fragment) OS=Arachis hypogaea OX=3818 PE=2 SV=1	3.36611			3.14608			4.42541	Mitochondria
Q6PSU5	33661.4	Conarachin (Fragment) OS=Arachis hypogaea OX=3818 PE=2 SV=1		2.8148						Vacuole
A0A290G0E3	33722.3	Resistance protein (Fragment) OS=Arachis hypogaea OX=3818 PE=2 SV=1						3.56383		Cell wall
J9Q9Z8	33739.1	Ethylene-responsive element binding factor 3 OS=Arachis hypogaea OX=3818 GN=ERF3 PE=2 SV=1			24.1664	70.8702	1.6962		42.9088	Nucleus
H6U5A8	33751.5	HATPase_c domain protein (Fragment) OS=Aspergillus flavus OX=5059 PE=2 SV=1	2.06564		2.49739	4.65318	2.27134	5.91981	3.00515	Chloroplast
A0A290GJT7	33769.6	Resistance protein (Fragment) OS=Arachis hypogaea OX=3818 PE=2 SV=1		2.23215	2.28297	2.97663		7.93883	12.9645	Cytoplasm
A0A023IUN1	33820.7	Abscisic acid 8-hydroxylase 3 (Fragment) OS=Arachis hypogaea OX=3818 GN=CYP707A PE=2 SV=1			8.95169			1.56605	9.08907	Endoplasmic reticulum
A0A0K0KBG9	33842.3	Squamosa promoter-binding-like protein OS=Arachis hypogaea OX=3818 GN=SPL8 PE=2 SV=1					1.77548		1.87452	Nucleus
A0A290G5E2;A0A290G026	33856.3	Resistance protein (Fragment) OS=Arachis hypogaea OX=3818 PE=2 SV=1					4.08702			Nucleus
A1E2B0	33862.2	11S seed storage globulin B1 OS=Arachis hypogaea OX=3818 PE=2 SV=1	1.53574		2.10318		2.65931			Choroplast
A0A1Z2RPA4	33871.7	Translation elongation factor 1-alpha (Fragment) OS=Cochliobolus miyabeanus OX=101162 GN=EF1a PE=4 SV=1		2.60984					10.1347	Cytoplasm
G0Y6W7	33902	Conarachin OS=Arachis hypogaea OX=3818 GN=205D04_17 PE=4 SV=1					3.18905	5.72791	29.6546	Chloroplast
A0A290G0D6	33920.5	Resistance protein (Fragment) OS=Arachis hypogaea OX=3818 PE=2 SV=1	3.90725		3.65229	18.3541		1.94848		Cytoplasm
P22195	34031.1	Cationic peroxidase 1 OS=Arachis hypogaea OX=3818 GN=PNC1 PE=1 SV=2		2.38546						Chlroplast
A0A2H4KDM7	34040.2	Ubiquinol oxidase (Fragment) OS=Arachis hypogaea OX=3818 PE=3 SV=1			8.04231	6.39668	12.6719			Mitochondria
A0A290G0B3	34091.5	Resistance protein (Fragment) OS=Arachis hypogaea OX=3818 PE=2 SV=1	2.26778	1.98409	2.40701					Cell wall
A0A2R2N306	34188.2	1-acyl-sn-glycerol-3-phosphate acyltransferase OS=Arachis hypogaea OX=3818 GN=LPAAT6 PE=2 SV=1		1.9868			1.85866	15.4762	2.8022	Chlroplast
V5T8I9	34189.6	Putative MYB-related protein 19 OS=Arachis hypogaea OX=3818 GN=MYB19 PE=4 SV=1		1.91117			2.13104			Nucleus
A0A290G536;A0A290GI30;A0A290GI58	34223.1	Resistance protein (Fragment) OS=Arachis hypogaea OX=3818 PE=2 SV=1					7.43185		13.8591	Cytoplasm
P20077	34253.4	Putative stilbene synthase 2 (Fragment) OS=Arachis hypogaea OX=3818 PE=5 SV=1					5.39257	26.7384		Cytoplasm
A0A290GKG3	34268.9	Resistance protein (Fragment) OS=Arachis hypogaea OX=3818 PE=2 SV=1						2.66145	5.10432	Nucleus
A0A3G1VVS8	34286.5	Superoxide dismutase copper chaperone OS=Arachis hypogaea OX=3818 PE=2 SV=1		1.58692						Chloroplast
A0A290G4W5	34316.2	Resistance protein (Fragment) OS=Arachis hypogaea OX=3818 PE=2 SV=1						10.1058	10.5639	Nucleus
B2ZHY3	34344.6	NAC-like transcription factor OS=Arachis hypogaea OX=3818 PE=2 SV=1					5.98201	2.20895		Nucleus
V5T6Q5	34360.1	Putative MYB-related protein 28 OS=Arachis hypogaea OX=3818 GN=MYB28 PE=4 SV=1		1.91336			1.96899	6.05349		Nucleus
A0A290G4S5	34379.5	Resistance protein (Fragment) OS=Arachis hypogaea OX=3818 PE=2 SV=1					1.62261	1.97421	2.77417	Cytoplasm
K0FBW3	34414.7	Ethylene-responsive element binding factor 4 OS=Arachis hypogaea OX=3818 GN=ERF4 PE=2 SV=1	6.26345		3.14246		1.92993	11.8322		Nucleus
A0A290FZX5;A0A290G060	34437.3	Resistance protein (Fragment) OS=Arachis hypogaea OX=3818 PE=2 SV=1			1.90906			2.64546		Cytoplasm
V5T679	34737.3	Putative R2R3 MYB protein 4 OS=Arachis hypogaea OX=3818 GN=MYB4 PE=4 SV=1	3.96107						4.73727	Nucleus
G0Y6U5	34763	Uncharacterized protein OS=Arachis hypogaea OX=3818 GN=303L13_15 PE=4 SV=1					1.59097			Nucleus
A0A1L1XUG9	34791.6	Phytol kinase 2 OS=Arachis hypogaea OX=3818 PE=2 SV=1					1.60775			Chloroplast
A0A384RIF0;A0A384RIF8	34851.9	Trans delta 3 fatty acid desaturase OS=Arachis hypogaea OX=3818 GN=FAD4b PE=2 SV=1						4.59946		Chlroplast
A0A290GE40	34866.2	Resistance protein (Fragment) OS=Arachis hypogaea OX=3818 PE=2 SV=1					5.23673	14.8858	103.376	Chlroplast
A0A384RIF8;A0A384RIF0	34877.9	Trans delta 3 fatty acid desaturase OS=Arachis hypogaea OX=3818 GN=FAD4a PE=2 SV=1	3.78006				2.24997			Chlroplast
A0A290GKL0	34881.7	Resistance protein (Fragment) OS=Arachis hypogaea OX=3818 PE=2 SV=1						6.13116	12.1857	Nucleus
V5T718	35071.5	Putative MYB-related protein 27 OS=Arachis hypogaea OX=3818 GN=MYB27 PE=4 SV=1					10.0719			Nucleus
A0A290GK42	35221.1	Resistance protein (Fragment) OS=Arachis hypogaea OX=3818 PE=2 SV=1					2.20465		27.559	Chlroplast
A0A290GK81	35236.4	Resistance protein (Fragment) OS=Arachis hypogaea OX=3818 PE=2 SV=1						1.80019		Chlroplast
N1NF28;N1NKK6	35278.9	Putative oligosaccharide biosynthesis protein OS=Arachis ipaensis OX=130454 GN=ARAX_AIPA147A20-002 PE=4 SV=1	2.10199							Chlroplast
A0A290G092	35292.7	Resistance protein (Fragment) OS=Arachis hypogaea OX=3818 PE=2 SV=1	2.43145				4.49849		19.3966	Mitochondria
A0A191UJ85	35336.9	Cytochrome f OS=Arachis hypogaea OX=3818 GN=petA PE=3 SV=1	1.98837		2.95934			14.1887		Cytoplasm
A0A290G570	35379.4	Resistance protein (Fragment) OS=Arachis hypogaea OX=3818 PE=2 SV=1					2.94419			Chlroplast
A0A290GKB4	35435.5	Resistance protein (Fragment) OS=Arachis hypogaea OX=3818 PE=2 SV=1					1.86554	2.78919	2.08828	Cytoplasm
A0A0F7GQF6	35451.6	Aminocyclopropanecarboxylate oxidase OS=Arachis hypogaea OX=3818 GN=ACO1 PE=2 SV=1			19.6796			9.36068	36.0457	Cytoplasm
A0A290GJX2	35655.8	Resistance protein (Fragment) OS=Arachis hypogaea OX=3818 PE=2 SV=1							4.72727	Nucleus
V5T8I2	35727.5	Putative R2R3 MYB protein 7 OS=Arachis hypogaea OX=3818 GN=MYB7 PE=4 SV=1		1.84717		2.20582	3.89504	7.84834	4.11604	Nucleus
A0A290GK67	35841	Resistance protein (Fragment) OS=Arachis hypogaea OX=3818 PE=2 SV=1		2.10658			2.94826	5.32531		Chlroplast
A0A0A1ESG0;A0A0A1EXN0	35969.4	Actin (Fragment) OS=Arachis hypogaea OX=3818 PE=3 SV=1	2.79967	1.56385		18.6397	1.57767			Mitochondria
P22196	36069.7	Cationic peroxidase 2 OS=Arachis hypogaea OX=3818 GN=PNC2 PE=2 SV=1			3.24347			2.70601	8.58825	Extracellular region
D3JWB7	36168.9	CCT domain protein (Fragment) OS=Arachis hypogaea OX=3818 GN=CCT PE=2 SV=2	1.55919	2.11489	4.85838		3.94579	2.44169		Nucleus
A0A290G004	36264.8	Resistance protein (Fragment) OS=Arachis hypogaea OX=3818 PE=2 SV=1					31.0575	8.992	3.58082	Cytoplasm
F6KLJ6;A0A0F7GF62	36267.1	Annexin OS=Arachis hypogaea var. vulgaris OX=925390 PE=2 SV=1							5.91219	Chloroplat
V5T714	36322.1	Putative MYB-related protein 22 OS=Arachis hypogaea OX=3818 GN=MYB22 PE=4 SV=1			2.65598			4.81573		Chlroplast
H9LBH7	36330.4	Monoacylglycerol acyltransferase OS=Arachis hypogaea OX=3818 GN=MGAT PE=2 SV=1	1.68338				5.32138			NA
A0A345GPQ3	36490.4	Peroxisomal fatty acid beta-oxidation multifunctional protein 1 (Fragment) OS=Arachis hypogaea OX=3818 GN=MFP1 PE=2 SV=1					16.5816			Peroxisome
A0A290GID4	36495.7	Mitogen-activated protein kinase (Fragment) OS=Arachis hypogaea OX=3818 PE=2 SV=1		6.5017						Nucleus
M4TFZ7	36541.9	Proteasome-associated protein ECM29 (Fragment) OS=Arachis hypogaea OX=3818 GN=ECM29 PE=2 SV=1		2.76734	4.42896		4.92716		10.3124	Cytoplasm
N1NJF9	36864.1	Putative Cation_efflux domain containing protein OS=Arachis duranensis OX=130453 GN=ARAX_ADH18B08-020 PE=4 SV=1					1.90402		23.815	Vacuole
A0A0K0KBH3	36989.9	Squamosa promoter-binding-like protein OS=Arachis hypogaea OX=3818 GN=SPL9 PE=2 SV=1							3.27233	Nucleus
A0A191UJB3	37028.1	Cytochrome c biogenesis protein CcsA OS=Arachis hypogaea OX=3818 GN=ccsA PE=3 SV=1						3.44785		Plasma membrane
A0A345GPQ2	37290.4	Long-chain fatty alcohol oxidase 2 (Fragment) OS=Arachis hypogaea OX=3818 GN=FAO2 PE=2 SV=1			17.1047				202.554	Mitochondrion
V5T705	37346.1	Putative 3R MYB protein 10 OS=Arachis hypogaea OX=3818 GN=MYB10 PE=4 SV=1							15.7675	Nucleus
A0A290G044	37377.5	Resistance protein (Fragment) OS=Arachis hypogaea OX=3818 PE=2 SV=1					5.37568	3.37347		Nucleus
V5T7X2	37511.2	Putative MYB-related protein 20 OS=Arachis hypogaea OX=3818 GN=MYB20 PE=4 SV=1							3.15076	Nucleus
A0A088BAX2	37595.5	Diacylglycerol acyltransferase OS=Arachis hypogaea OX=3818 GN=DGAT PE=2 SV=1	1.9284	1.50948						Nucleus
N1NEV6	37673.6	Uncharacterized protein OS=Arachis duranensis OX=130453 GN=ARAX_ADH25F09-008 PE=4 SV=1					4.4274	2.21471	2.37197	Nucleus
A8VTA4	37735.7	Diacylglycerol acyltransferase OS=Arachis hypogaea OX=3818 GN=DGAT PE=2 SV=1	1.74725				2.63614	3.12978		Chloroplast
A0A290GE61	37741.7	Resistance protein (Fragment) OS=Arachis hypogaea OX=3818 PE=2 SV=1					1.94295			Nucleus
T2B995	37781.5	Malate dehydrogenase OS=Arachis hypogaea OX=3818 GN=MDH PE=2 SV=1	1.70654				4.44495			Chlroplast
D5LG62	37845.5	HSR203J protein OS=Arachis hypogaea OX=3818 GN=hsr203J PE=4 SV=1		2.02995						Nucleus
D5LG62	37845.5	HSR203J protein OS=Arachis hypogaea OX=3818 GN=hsr203J PE=4 SV=1					26.2069	6.87344		Nucleus
C6EU67	37944.4	NAC-like transcription factor OS=Arachis hypogaea OX=3818 GN=NAC3 PE=2 SV=1		2.20282	4.2815		1.56418			Nucleus
A0A290G0A8	37998.8	Resistance protein (Fragment) OS=Arachis hypogaea OX=3818 PE=2 SV=1		1.57667	4.72096					Cytoplasm
A0A290G0A8	37998.8	Resistance protein (Fragment) OS=Arachis hypogaea OX=3818 PE=2 SV=1					2.91556	6.69465	79.6355	Cytoplasm
A0A0K0KCL4	38007	Squamosa promoter-binding-like protein OS=Arachis hypogaea OX=3818 GN=SPL2 PE=2 SV=1		2.42102	2.60998			2.55928		Nucleus
V5T7Y1	38121.1	Putative MYB-related protein 30 OS=Arachis hypogaea OX=3818 GN=MYB30 PE=4 SV=1		1.65283	4.50206			6.27821		Nucleus
G0Y6T5	38155.2	Uncharacterized protein OS=Arachis hypogaea OX=3818 GN=303L13_5 PE=4 SV=1					1.79624			Nucleus
A0A191UJA3	38248.2	DNA-directed RNA polymerase subunit alpha OS=Arachis hypogaea OX=3818 GN=rpoA PE=3 SV=1					11.0268			Chloroplast
A0A290GK03	38297.6	Resistance protein (Fragment) OS=Arachis hypogaea OX=3818 PE=2 SV=1					2.60139	3.6775		NA
Q2KP14	38491.7	Soluble diacylglycerol acyltransferase OS=Arachis hypogaea OX=3818 GN=DGAT3 PE=2 SV=1				6.01686			35.8659	Nucleus
F1AM72;Q06H29	38533.9	Triacylglycerol lipase 3 OS=Arachis hypogaea OX=3818 PE=2 SV=1		3.63129			2.32668	6.34839	1.84848	Cytoplasm
N1NKL1	38538.5	Putative HpcH/HpaI aldolase/citrate lyase OS=Arachis duranensis OX=130453 GN=ARAX_ADH068E04-007 PE=4 SV=1						3.60984		Chloroplast
T2B9M0	38610.7	Fructose-bisphosphate aldolase OS=Arachis hypogaea OX=3818 PE=2 SV=1		2.29553	1.70486	1.91939	3.08724	7.28635	7.57725	Cytoplasm
A0A384R632	38957	Sphingolipid delta(4)-desaturase DES1-like OS=Arachis hypogaea OX=3818 GN=DES1 PE=2 SV=1	3.59112						3.99552	Endoplasmic reticulum
M4IXA7	38977.6	Beta-1_3-glucanase OS=Arachis hypogaea OX=3818 PE=2 SV=1					2.8019			Exacelllular matrix
A0A290G093	38981.2	Resistance protein (Fragment) OS=Arachis hypogaea OX=3818 PE=2 SV=1							6.63956	Chlroplast
A7LB60	39034	Steroleosin-A OS=Arachis hypogaea OX=3818 GN=STO-A PE=2 SV=1			3.17329	1.57927	4.09971		24.1532	Extracellular matrix
A0A191UJ53	39062.7	Photosystem II protein D1 OS=Arachis hypogaea OX=3818 GN=psbA PE=3 SV=1						2.1225		Plasma membrane
A0A290GKB2	39164.5	Resistance protein (Fragment) OS=Arachis hypogaea OX=3818 PE=2 SV=1					8.42103			Mitochondria
A0A290GEB8	39180.7	Resistance protein (Fragment) OS=Arachis hypogaea OX=3818 PE=2 SV=1					3.00437			Mitochondria
M1SQR7;A0A290FZZ0	39248.5	Serine/threonine protein kinase OS=Arachis hypogaea OX=3818 GN=STK PE=2 SV=1					2.1742			Cytoplasm
Q6YDF1	39336	Resistance protein (Fragment) OS=Arachis cardenasii OX=51121 PE=4 SV=1					2.74749	2.55591		Cytoplasm
A0A2I7NA04	39363.2	Gamma-TMT1 OS=Arachis hypogaea OX=3818 PE=3 SV=1		4.84532			6.53264	12.5563		Chlroplast
C6EU68;I6LM45;K8FIB9	39374	NAC-like transcription factor OS=Arachis hypogaea OX=3818 GN=NAC2 PE=2 SV=1	1.67051		2.6189	4.04107			16.5894	Nucleus
G9I5H8	39385.2	DFR OS=Arachis hypogaea OX=3818 PE=2 SV=1	1.99654		6.1071		2.03793		22.3844	Cytoplasm
A0A0A7DZG5	39427.7	GID1 OS=Arachis hypogaea OX=3818 PE=2 SV=1			1.68889			4.52947	4.81148	Nucleus
A0A2I7NA03	39430.4	Gamma-TMT2 OS=Arachis hypogaea OX=3818 PE=3 SV=1			1.99734		11.1705			Chloroplast
A0A290G526	39459.8	Resistance protein (Fragment) OS=Arachis hypogaea OX=3818 PE=2 SV=1				3.16356			4.79619	Nucleus
A0A0K0KBH4	39522.9	Squamosa promoter-binding-like protein OS=Arachis hypogaea OX=3818 GN=SPL16 PE=2 SV=1					3.24531	5.1341		Nucleus
B5AK53	39670.5	WRKY transcription factor OS=Arachis hypogaea OX=3818 PE=2 SV=1			12.1494					Nucleus
B5AK53	39670.5	WRKY transcription factor OS=Arachis hypogaea OX=3818 PE=2 SV=1						8.5847		Nucleus
A0A126DIH0	39755.3	DnaJ OS=Arachis hypogaea OX=3818 PE=2 SV=1						3.70791	13.4766	Chlroplast
G0Y6U2	39756.7	Zinc finger GRF-type protein OS=Arachis hypogaea OX=3818 GN=303L13_12 PE=4 SV=1							3.8412	Nucleus
A7LB59	39882.8	Steroleosin-B OS=Arachis hypogaea OX=3818 GN=STO-B PE=2 SV=1		2.51859	2.04105			2.83886	6.76903	Chloroplast
D7RJM3	39889.9	S-adenosylmethionine decarboxylase proenzyme OS=Arachis hypogaea OX=3818 GN=SAMDC PE=2 SV=1		2.02301						Cell membrane
E3P862	39913.7	Cysteine protease OS=Arachis diogoi OX=170720 PE=2 SV=2	3.20087		6.69612	2.73867				Vacuole
A0A290GK31	39968.9	Resistance protein (Fragment) OS=Arachis hypogaea OX=3818 PE=2 SV=1					1.95142	4.69889	63.3752	Extracellular matrix
A0A0K0KBG3	40173	Anthocyanidin synthase OS=Arachis hypogaea OX=3818 GN=ANS PE=2 SV=1	2.07028				2.11393	3.98907	1.83084	Cytoplasm
G3F840;G3F838;G3F842;G3F839;G3F837;G3F843	40183.1	2-methyl-6-phytylbenzoquinone methyltranferase 1 OS=Arachis hypogaea OX=3818 GN=mpbqmt-1 PE=2 SV=1							3.53646	Chlroplast
A0A0K0KBG1	40240.6	Dihydroflavonol-4-reductase OS=Arachis hypogaea OX=3818 GN=DFR PE=2 SV=1					4.09964	5.34128	12.4816	Golgi apparatus
A0A191UJC1	40292.1	NAD(P)H-quinone oxidoreductase subunit 1_ chloroplastic OS=Arachis hypogaea OX=3818 GN=ndhA PE=3 SV=1							12.7473	Plasma membrane
A0A290GE70	40388.9	Resistance protein (Fragment) OS=Arachis hypogaea OX=3818 PE=2 SV=1					1.63323		3.12727	Chlroplast
V5T701	40425.7	Putative R2R3 MYB protein 5 OS=Arachis hypogaea OX=3818 GN=MYB5 PE=4 SV=1		1.65941				3.53759		Nucleus
B7UCQ3	40461.2	Cysteine protease-like protein OS=Arachis hypogaea OX=3818 PE=2 SV=1					1.99347	2.22035		Mitochondria
E7CQA1	40699.3	Heat shock transcription factor A-2 OS=Arachis hypogaea subsp. hypogaea OX=226205 GN=HsfA2 PE=2 SV=1		2.08746			2.05881	6.05047	9.064	Nucleus
A0A290GE30	40748.3	Resistance protein (Fragment) OS=Arachis hypogaea OX=3818 PE=2 SV=1					4.24713		15.2723	Cytoplasm
D8KXY5;D8KXY6;D8KXY7	41107.1	Malonyl-CoA:ACP transacylase 1-1 OS=Arachis hypogaea OX=3818 GN=MCAT1-1 PE=2 SV=1			3.85695		2.17476			Chloroplast
V5T8J3	41143.9	Putative MYB-related protein 24 OS=Arachis hypogaea OX=3818 GN=MYB24 PE=4 SV=1					2.30744	14.4629	64.1307	Nucleus
Q0PWM5	41170	Mannitol-1-phosphate 5-dehydrogenase OS=Escherichia coli (strain K12 / W3110 / ATCC 27325 / DSM 5911) OX=316407 GN=mtlD PE=3 SV=1	2.25127	2.0543					15.8022	Chloroplast
A0A290G0B2	41278	Resistance protein (Fragment) OS=Arachis hypogaea OX=3818 PE=2 SV=1				6.10966	2.93582		2.4602	Chloroplast
A0A0K0KCL2	41494.2	Flavanone-3-hydroxylase OS=Arachis hypogaea OX=3818 GN=F3H PE=2 SV=1		1.70561			3.9706	10.4902	32.2272	Cytoplasm
K0FAV2	41496	Ethylene-responsive element binding factor 1 OS=Arachis hypogaea OX=3818 GN=ERF1 PE=2 SV=1						3.82549	3.13592	Nucleus
D8KXZ8;E6Y9A9;D8KXZ6;D8KXZ7	41589.6	Enoyl-ACP reductase 1-3 OS=Arachis hypogaea OX=3818 GN=ENR1-3 PE=2 SV=1							4.13787	Chlroplast
A0A0R4UZT6	41774.8	Acetoacetyl-coenzyme A thiolase OS=Arachis hypogaea OX=3818 GN=ACAT PE=2 SV=1					2.09667	14.0721	2.43574	Peroxisome
N1NFV1	42021.1	PfkB family kinase OS=Arachis duranensis OX=130453 GN=ARAX_ADH079023-072J06-004 PE=4 SV=1					3.80378	1.97825	30.5282	Chloroplast
E9JSA5	42409.1	Acyl-[acyl-carrier-protein] hydrolase OS=Arachis hypogaea OX=3818 GN=FATA PE=2 SV=1		1.76469					5.01655	Chlroplast
C0L2V1	42414.6	Putative disease resistance protein OS=Arachis hypogaea OX=3818 PE=4 SV=1			9.49453			12.6676	10.6974	Extracellular matrix
A0A075BHT2	42421.6	FUSCA3 OS=Arachis hypogaea OX=3818 GN=FUS3 PE=2 SV=1		30.2504	3.64527			11.7102	2.12561	Nucleus
A0A345GPQ1	42740.3	Long-chain fatty alcohol oxidase 1 (Fragment) OS=Arachis hypogaea OX=3818 GN=FAO1 PE=2 SV=1						3.59274		Vacuole
A9YED0	42901.2	Mitogen-activated protein kinase OS=Arachis hypogaea OX=3818 PE=2 SV=2	3.05799		4.25949		18.7694	22.0111	14.9209	Cytoplasm
D8KXZ1	43060.7	Beta-ketoacyl-ACP synthase III-1 OS=Arachis hypogaea OX=3818 GN=KASIII-1 PE=2 SV=1					5.5015	7.89436	5.4527	Chlroplast
A0A290GJX8;A0A290G064	43164.6	Resistance protein (Fragment) OS=Arachis hypogaea OX=3818 PE=2 SV=1		1.94889						Chlroplast
A0A0U1XHN2	43197	Fructose-bisphosphate aldolase OS=Arachis hypogaea OX=3818 GN=FBP1 PE=2 SV=1			3.23844		2.41727		3.24038	Chloroplast
N1NFX4	43225	Uncharacterized protein OS=Arachis hypogaea OX=3818 GN=ARAX_AHF417E07-007 PE=4 SV=1		3.39397						Endoplasmic reticulum
Q45L50;D9IA36	43261.8	Resveratrol synthase 3 OS=Arachis hypogaea OX=3818 GN=RS3 PE=2 SV=1	1.63636		2.14386					Cytoplasm
A0A345BT89	43268.6	mTERF2 OS=Arachis hypogaea OX=3818 PE=2 SV=1		2.79818	13.1138		28.0601	20.0441		Nucleus
I3QQ51	43279.7	Resveratrol synthase OS=Arachis hypogaea OX=3818 PE=2 SV=1					4.95684			Cytoplasm
V9PW63	43299	Putative stilbene synthase OS=Arachis hypogaea OX=3818 PE=3 SV=1		1.64143			1.83158			Cytoplasm
A0A0K0KBF8;Q84XA8;Q5XVS6	43319.9	Chalcone synthase OS=Arachis hypogaea OX=3818 GN=CHS1 PE=2 SV=1						2.81925		Cytoplasm
A0A0U3DVB5	43332.1	Inositol-tetrakisphosphate 1-kinase OS=Arachis hypogaea OX=3818 GN=ITPK1 PE=2 SV=1		2.01365			2.84471	2.78392	6.26331	Cytoplasm
A0A290GJZ4	43449.4	Resistance protein (Fragment) OS=Arachis hypogaea OX=3818 PE=2 SV=1		2.15462					5.78079	Nucleus
F8UX79	43464.3	Glyceraldehyde-3-phosphate dehydrogenase OS=Arachis hypogaea OX=3818 PE=2 SV=1					22.5281	3.46072		Chloroplast
D4NYK8	43526.5	Phenylalanine ammonia-lyase (Fragment) OS=Arachis hypogaea OX=3818 GN=PAL PE=2 SV=1		3.76517			2.96665			Cytoplasm and Cytosol
A0A0K0KBH0	43590.1	Chalcone synthase OS=Arachis hypogaea OX=3818 GN=CHS2 PE=2 SV=1	1.8978						6.89597	Cytoplasm
A0A290G0I0	43612.1	Resistance protein (Fragment) OS=Arachis hypogaea OX=3818 PE=2 SV=1					10.6583	19.8532	11.4122	Chloroplast
I6XQQ7	43650.9	S-adenosylmethionine synthase OS=Arachis hypogaea OX=3818 PE=2 SV=1					2.25961	1.87201		Cytoplasm and Cytosol
A0A384QWC2	43906.2	Acyl-[acyl-carrier-protein] desaturase OS=Arachis hypogaea OX=3818 GN=FAB2-2 PE=2 SV=1		2.8825			3.0017			Chlroplast
A0A290GE98;A0A290GK43	43919.9	Resistance protein (Fragment) OS=Arachis hypogaea OX=3818 PE=2 SV=1	2.9926		2.0192			6.4712	5.97138	Cytoplasm
X4YFV5	43965.5	Omega-6 fatty acid desaturase OS=Arachis hypogaea OX=3818 GN=fad2-2 PE=2 SV=1					4.33742			Peroxisome
A0A290G089	44030.9	Resistance protein (Fragment) OS=Arachis hypogaea OX=3818 PE=2 SV=1					2.4957			Nucleus
E6Y9B0	44171.5	Microsomal omega-6 fatty acid desaturase OS=Arachis hypogaea OX=3818 GN=fad2 PE=2 SV=1	2.30983							Endoplasmic reticulum
A0A3G0YUC8	44363.9	Lysophosphatidyl acyltransferase 5 OS=Arachis hypogaea OX=3818 GN=LPAT5 PE=2 SV=1	5.40042		3.90006	1.82097	1.95148	1.59198	37.3967	Chlroplast
A0A290GE49	44432.5	Resistance protein (Fragment) OS=Arachis hypogaea OX=3818 PE=2 SV=1	2.59739						15.5022	Nucleus
A0A1P8J7T5	44452.4	Post-drought growth recover factor 1 OS=Arachis hypogaea OX=3818 GN=PGRF1 PE=2 SV=1			2.71773		3.53976		2.07227	Nucleus
A0A075BIU4;A0A0A6ZDS3	44685.8	60S ribosomal protein L4/L1 OS=Arachis hypogaea OX=3818 PE=2 SV=1		3.08339	2.30117		7.85292		4.75341	Cytoplasm
A0A2H4GDD0	44703.6	Resveratrol 3'-dimethylallyltransferase OS=Arachis hypogaea OX=3818 GN=R3'DT-1 PE=2 SV=1					17.1457	2.52375		Cell membrane
A0A290G4X4	44706.8	Resistance protein (Fragment) OS=Arachis hypogaea OX=3818 PE=2 SV=1						4.78586	5.52983	Cytoplasm
N1NJI6	44770.7	Uncharacterized protein OS=Arachis duranensis OX=130453 GN=ARAX_ADH035P21-007 PE=4 SV=1		1.58755						Endoplasmic reticulum
N1NFV9	44845	Putative cytidylyltransferase OS=Arachis duranensis OX=130453 GN=ARAX_ADH079023-072J06-018 PE=4 SV=1						2.9256	10.8419	Chloroplast
A0A142F3D2	45025.3	Glutamate dehydrogenase OS=Arachis hypogaea OX=3818 GN=GDH1 PE=2 SV=1					3.41461		21.7148	Cytoplasm
A0A384RFN3	45118.9	Acyl-[acyl-carrier-protein] desaturase OS=Arachis hypogaea OX=3818 GN=FAB2-3 PE=2 SV=1			1.85985	6.09417		10.8101	30.2345	Chloroplast
A0A2P9J4Q7;A0A2H4GDC8	45119.8	Putative prenyltransferase OS=Arachis hypogaea OX=3818 GN=PT-9i2 PE=2 SV=1		3.30243					10.6237	Plasma membrane
A0A2H4GDD4	45156.5	Resveratrol 3'-dimethylallyltransferase OS=Arachis hypogaea OX=3818 GN=R3'DT-4 PE=2 SV=1					5.47223			Plasma membrane
K0FB33	45182.5	Ethylene-responsive element binding factor 6 OS=Arachis hypogaea OX=3818 GN=ERF6 PE=2 SV=1			2.03322					Nucleus
A0A0K0KBH9	45228.8	Squamosa promoter-binding-like protein OS=Arachis hypogaea OX=3818 GN=SPL13 PE=2 SV=1			2.54646		4.40197			Nucleus
A0A384QZQ3	45641.1	Palmitoyl-monogalactosyldiacylglycerol delta-7 desaturase OS=Arachis hypogaea OX=3818 GN=FAD5 PE=2 SV=1		1.96667	6.01191		5.99368		3.6057	Endoplasmic reticulum
A0A191UJC0	45733	NAD(P)H-quinone oxidoreductase subunit H_ chloroplastic OS=Arachis hypogaea OX=3818 GN=ndhH PE=3 SV=1			27.8687	4.5903			12.7981	Chloroplast
D0MQ49	45756.1	Mitogen-activated protein kinase OS=Arachis hypogaea OX=3818 PE=2 SV=1		2.74182			4.29102	25.0669	79.7706	Cytoplasm
A0A384QW95;A0A384RDM5	45865.4	Microsomal delta 15 desaturase OS=Arachis hypogaea OX=3818 GN=FAD3-2c PE=2 SV=1			2.57013			28.4955		Plasma membrane
F1AM71	46033.3	Lipase OS=Arachis hypogaea OX=3818 PE=2 SV=1			1.61121			62.6542	9.3661	Nucleus
A9P5P2;A9P5P3;E9JSA6;J9S2X8;J9T315;A9P5P1	46073.5	Acyl-[acyl-carrier-protein] hydrolase OS=Arachis hypogaea OX=3818 GN=pFatB PE=2 SV=1						3.97927		Chlroplast
A0A2H4GDC8;A0A2P9J4Q7	46160.2	Resveratrol 4-dimethylallyltransferase OS=Arachis hypogaea OX=3818 GN=R4DT-1 PE=2 SV=1							6.1148	Plasma membrane
B6ECZ0;E9JSA8;E9JSA9;Q9SW87	46422.8	Acyl-[acyl-carrier-protein] desaturase OS=Arachis hypogaea OX=3818 PE=2 SV=1							8.80215	Chlroplast
A0A2H4GDC9;A0A2H4GDD3	46472.8	Resveratrol 3'-dimethylallyltransferase OS=Arachis hypogaea OX=3818 GN=R3'DT-3 PE=2 SV=1			3.05522					Plasma membrane
A0A290G0L9	46500.2	Resistance protein (Fragment) OS=Arachis hypogaea OX=3818 PE=2 SV=1		2.48837						Cell membrane
A0A290G0L9	46500.2	Resistance protein (Fragment) OS=Arachis hypogaea OX=3818 PE=2 SV=1					8.43429		5.77614	Cell membrane
Q9AWA6	46571.3	Serine/threonine/tyrosine kinase OS=Arachis hypogaea OX=3818 PE=2 SV=1		1.75281					5.21718	Nucleus
A0A290G0N3	46803.4	Resistance protein (Fragment) OS=Arachis hypogaea OX=3818 PE=2 SV=1					3.61045			Cell membrane
B2Z3Y4	46898.2	Plasma membrane mannitol transporter (Fragment) OS=Arachis hypogaea OX=3818 GN=MaT2 PE=2 SV=1		1.63854			3.08106	7.31287	44.5068	Cell membrane
M4T4B6	46921.3	Growth-regulating factor (Fragment) OS=Arachis hypogaea OX=3818 GN=GRF PE=2 SV=1		2.10758	2.57513					Nucleus
Q9SW87	47038.5	Acyl-[acyl-carrier-protein] desaturase OS=Arachis hypogaea OX=3818 PE=2 SV=1							2.1185	Chloroplast
A0A190CSF1	47315.3	Eukaryotic translation initiation factor 4A OS=Arachis hypogaea OX=3818 GN=eIF4A PE=2 SV=1							10.7873	Nucleus
A0A0K0KBG6	47753.5	Squamosa promoter-binding-like protein OS=Arachis hypogaea OX=3818 GN=SPL2 PE=2 SV=1	1.71186		7.7705			3.62256		Nucleus
A0A0R4VP56	47771.5	Ethanolamine-phosphate cytidylyltransferase OS=Arachis hypogaea OX=3818 GN=PECT PE=2 SV=1					2.72112	4.41873		Chloroplast
N1NKK6	48104.6	Putative oligosaccharide biosynthesis protein OS=Arachis duranensis OX=130453 GN=ARAX_ADH068E04-002 PE=4 SV=1			1.55758		6.44148	6.08951	5.48927	Endoplasmic reticulum
Q6PSU4	48151.5	Conarachin (Fragment) OS=Arachis hypogaea OX=3818 PE=2 SV=1		2.31676			2.4887			Vacuole
N1NG06	48153.6	3-ketoacyl-CoA synthase OS=Arachis duranensis OX=130453 GN=ARAX_ADH068E04-005 PE=3 SV=1		1.67266	3.48499		7.41617	21.448	14.8055	Cytoplasm
V5T8I4	48206.9	Putative MYB-related protein 13 OS=Arachis hypogaea OX=3818 GN=MYB13 PE=4 SV=1	1.60065		1.98503					Nucleus
A0A290GEK7	48222.1	Resistance protein (Fragment) OS=Arachis hypogaea OX=3818 PE=2 SV=1					2.49995			Plasma membrane
N1NJG4	48239.9	Pyruvate dehydrogenase E1 component subunit alpha OS=Arachis duranensis OX=130453 GN=ARAX_ADH18B08-015 PE=4 SV=1		1.91162			5.22854		7.62191	Chloroplast
G4X5C7	48255	ABA response element binding protein 1 OS=Arachis hypogaea OX=3818 GN=AREB1 PE=4 SV=1		2.85502	12.566			25.8763	5.85589	Nucleus
N1NFY7	48578.7	Putative ceramide kinase-related protein OS=Arachis ipaensis OX=130454 GN=ARAX_AIPA147A20-015 PE=4 SV=1		3.1779					9.50484	Chloroplast
N1NEW5	48638	Uncharacterized protein OS=Arachis duranensis OX=130453 GN=ARAX_ADH51I17-83F22-002 PE=4 SV=1	2.31592		2.10368		1.7248		7.50312	Nucleus
A0A0R4UXQ1;E3NYU4	48861.6	3-ketoacyl-CoA thiolase OS=Arachis hypogaea OX=3818 GN=PKT PE=2 SV=1			4.57894			8.90961		Mitochondria
N1NFV2	48975.9	S-acyltransferase OS=Arachis duranensis OX=130453 GN=ARAX_ADH18B08-010 PE=3 SV=1	4.44114	1.64008						Golgi apparatus
A0A290GK71	49610.1	Resistance protein (Fragment) OS=Arachis hypogaea OX=3818 PE=2 SV=1		2.21333			2.51362			Chlroplast
G0Y6W9	49893.1	Uncharacterized protein OS=Arachis hypogaea OX=3818 GN=205D04_19 PE=4 SV=1			1.77972		2.38213	3.86496	7.62205	Chloroplast
A0A2I6PCK3;A0A2I6PCK5	49963.9	Putative prenyltransferase OS=Arachis hypogaea OX=3818 GN=RPT-10a4 PE=2 SV=1					1.50676	2.20623	3.55053	Plasma membrane
A0A290G586	50041.9	Resistance protein (Fragment) OS=Arachis hypogaea OX=3818 PE=2 SV=1							1.83788	Chlroplast
A0A290GEE6	50397	Resistance protein (Fragment) OS=Arachis hypogaea OX=3818 PE=2 SV=1			4.79431				13.6052	Chlroplast
A0A0R4VXV1	50463.8	Phosphatidylserine decarboxylase proenzyme 1_ mitochondrial OS=Arachis hypogaea OX=3818 GN=PSD PE=2 SV=1			3.58912				11.8911	Chlroplast
E6Y9A7;D8KXY9;D8KXY8	50472.2	Beta-ketoacyl-ACP synthetase I OS=Arachis hypogaea OX=3818 GN=kasI PE=2 SV=1	1.66853			5.85964	5.65064		7.51203	Chlroplast
A0A0B6W1Z3	50657.6	Non-specific serine/threonine protein kinase OS=Arachis hypogaea OX=3818 GN=sos2 PE=2 SV=1	1.85119					31.6707		Nucleus
A0A290G0M2	50731.5	Resistance protein (Fragment) OS=Arachis hypogaea OX=3818 PE=2 SV=1		2.71341					3.97058	Nucleus
N1NF45	51366.9	Putative serine carboxypeptidase OS=Arachis duranensis OX=130453 GN=ARAX_ADH068E04-009 PE=3 SV=1						8.56543		Vacuole
A0A0K0KBH6	51400	Squamosa promoter-binding-like protein OS=Arachis hypogaea OX=3818 GN=SPL6 PE=2 SV=1		1.69548			2.62194			Nucleus
A0A384RFP1	51863.1	Plastidial delta 15 desaturase OS=Arachis hypogaea OX=3818 GN=FAD7-2 PE=2 SV=1	9.11172				2.1236	2.30898		Endoplasmic reticulum
A0A191UJ61	52091.1	Photosystem II CP43 reaction center protein OS=Arachis hypogaea OX=3818 GN=psbC PE=3 SV=1		2.33014	3.31799		3.62249		2.41484	Chloroplast
E6Y9A8	52098.4	Chloroplast omega-6 fatty acid desaturase OS=Arachis hypogaea OX=3818 GN=fad6 PE=2 SV=1			2.26739	13.3426		2.48967	3.18884	Chloroplast
H6QXH1	52105.6	Sphingolipid delta-8 desaturase OS=Arachis hypogaea OX=3818 GN=delta 8 PE=2 SV=1			2.3852		1.73528	1.87161		Endoplasmic reticulum
A0A290GK82	52193.5	Resistance protein (Fragment) OS=Arachis hypogaea OX=3818 PE=2 SV=1					21.4471			Cytoplasm
A0A384QWC4;A0A187G9L3	52250.8	Plastidial delta 15 desaturase OS=Arachis hypogaea OX=3818 GN=FAD7-1b PE=2 SV=1			1.9468					Plasma membrane
A0A0A6ZDT3;A0A0A6ZDR9	52321.3	Serine hydroxymethyltransferase OS=Arachis hypogaea OX=3818 PE=3 SV=1			5.07149		5.16604	2.14483		Cytoplasm
A0A075M4S4;A0A075M4X4;A0A075M981;A0A191UJ50;O20356;A0A2S0DEU8;A0A2D1BXD9;A9YSZ2	52396.3	Ribulose bisphosphate carboxylase large chain (Fragment) OS=Arachis ipaensis OX=130454 GN=rbcL PE=3 SV=1					3.75848	7.35216	5.24881	Cytoplasm
A0A384QWE0	52468.1	Sphingolipid delta8 desaturase OS=Arachis hypogaea OX=3818 GN=SLD1-3 PE=2 SV=1		2.21959						Endoplasmic reticulum
A0A0U1WLM2	52469.5	HUGT83A1-like protein OS=Arachis hypogaea OX=3818 PE=2 SV=1			2.40048		12.9446	5.23508	8.70526	Extracellular matrix
A0A290G5C2	52484.6	Resistance protein (Fragment) OS=Arachis hypogaea OX=3818 PE=2 SV=1	2.14938				8.63246		4.70626	Cell membrane
A0A384QZP9	52489.2	Sphingolipid delta8 desaturase OS=Arachis hypogaea OX=3818 GN=SLD1-2 PE=2 SV=1	2.28837			9.71195	3.81702	27.2941	73.3	Endoplasmic reticulum
A0A140WLY7;A0A384QWC4	52638.1	Omega-3 fatty acid desaturase OS=Arachis hypogaea OX=3818 GN=FAD8 PE=2 SV=1					4.1227	46.4942		Plasma membrane
A0A290GKC9	52707.2	Resistance protein (Fragment) OS=Arachis hypogaea OX=3818 PE=2 SV=1						2.43092	19.6763	Cell membrane
A0A2R9ZPY0	52857.2	Arachin Ahy-2 OS=Arachis hypogaea OX=3818 PE=4 SV=1				2.07672	2.8045		2.34398	Vacuole
A0A023IUM3	52940.2	Histone deacetylase OS=Arachis hypogaea OX=3818 GN=HDA1 PE=2 SV=1	1.70595				1.85515	4.55104	11.6216	Cytoplasm
A0A290GJY3;A0A290GJS7	52955.9	Resistance protein (Fragment) OS=Arachis hypogaea OX=3818 PE=2 SV=1	4.38739		2.56852	4.83374	1.50713	2.53372		Cytoplasm
A0A191UJ50;A0A075M4S4;A0A075M4X4;A0A075M981;O20356;A0A2D1BXD9;A0A2S0DEU8;A9YSZ2	53043.1	Ribulose bisphosphate carboxylase large chain OS=Arachis hypogaea OX=3818 GN=rbcL PE=3 SV=1		2.06909	10.7507		3.0548	1.7017		Cytoplasm
A0A290GKN9	53497.2	Resistance protein (Fragment) OS=Arachis hypogaea OX=3818 PE=2 SV=1	1.63513			3.86942				Cytoplasm
A0A290GKN9	53497.2	Resistance protein (Fragment) OS=Arachis hypogaea OX=3818 PE=2 SV=1					1.7179		4.78782	Cytoplasm
U6NHS3;A0A023IUN2	53664.4	ABA 8'-hydroxylase OS=Arachis hypogaea OX=3818 GN=CYP707A1 PE=2 SV=1							9.19285	Chlroplast
A0A0K0K9Q6	53748.9	Glyceraldehyde-3-phosphate dehydrogenase OS=Arachis diogoi OX=170720 PE=2 SV=1	1.81959			3.84766		5.71658		Cytoplasm
H9L6X4	53799.1	UDP-sulfoquinovose synthase OS=Arachis hypogaea OX=3818 GN=SQD1 PE=2 SV=1	3.56292	1.73793			19.8149		7.03995	Chloroplast
A0A191UJ49	53837	ATP synthase subunit beta_ chloroplastic OS=Arachis hypogaea OX=3818 GN=atpB PE=3 SV=1			2.04345		2.90378			Chloroplast
A0A1P8NPH4	53853.7	Ferrochelatase OS=Arachis hypogaea OX=3818 GN=FC1 PE=2 SV=1	1.82513			9.52904			17.6958	Chlroplast
N1NG39	53895.3	Putative single-stranded DNA binding protein OS=Arachis duranensis OX=130453 GN=ARAX_ADH068E04-008 PE=4 SV=1		2.04698			3.52253	2.7467		Chloroplast
A0A345BT88	53976.6	mTERF1 OS=Arachis hypogaea OX=3818 PE=2 SV=1		2.13118						Chloroplast
A0A290G5D2	54059.6	Resistance protein (Fragment) OS=Arachis hypogaea OX=3818 PE=2 SV=1					3.70892	8.24538	13.8617	Chlroplast
A0A290GE90	54242.9	Resistance protein (Fragment) OS=Arachis hypogaea OX=3818 PE=2 SV=1					1.98041	6.1194		Chlroplast
I6N3H4	54289.7	Vacuolar processing enzyme OS=Arachis diogoi OX=170720 PE=2 SV=1					6.5614			Vacuole
M4T4B0;M4SZY4	54550.7	Ubiquitin carboxyl-terminal hydrolase 6 OS=Arachis hypogaea OX=3818 GN=UCH6 PE=2 SV=1	2.42906	1.63207					12.2545	Nucleus
A0A290G0I7	54697.2	Resistance protein (Fragment) OS=Arachis hypogaea OX=3818 PE=2 SV=1						9.76178		Plasma membrane
A0A0K0KBH5	54730.7	Glycosyltransferase OS=Arachis hypogaea OX=3818 GN=UGT PE=2 SV=1		2.17598	6.38138		5.63632			Chloroplast
A0A158UWU4	54760.1	NAD(P)H-quinone oxidoreductase subunit 2_ chloroplastic OS=Arachis hypogaea OX=3818 GN=ndhB PE=3 SV=1							44.954	Chloroplast
A0A290GK23	54786.7	Resistance protein (Fragment) OS=Arachis hypogaea OX=3818 PE=2 SV=1					5.13001	1.95893		Cell membrane
Q647H2	55024.9	Arachin Ahy-3 OS=Arachis hypogaea OX=3818 PE=1 SV=1	4.72366		2.35917			2.00463	8.17247	Vacuole
W5QV07	55064.7	Nonexpressor of pathogenesis-related protein 1 OS=Arachis rigonii OX=224335 GN=NPR1 PE=2 SV=1	1.56704		8.83273	22.5678	3.06072	4.89136	4.0145	Nucleus
U6NJF1;K4PM24	55281.2	ABA 8'-hydroxylase OS=Arachis hypogaea OX=3818 GN=CYP707A2 PE=2 SV=1	4.34542	3.19305			2.13992	4.30562	8.69073	Nucleus
J9PI84	55553.2	Divalent metal transporter 1 OS=Arachis hypogaea OX=3818 GN=Dmt1 PE=3 SV=1			2.52687	7.38557			9.48051	Cell membrane
A0A290G0G5	55680.9	Resistance protein (Fragment) OS=Arachis hypogaea OX=3818 PE=2 SV=1		3.08249	6.48225		2.24858	2.51864	4.0171	Cell wall
A0A191UJ70	55741.8	ATP synthase subunit alpha_ chloroplastic OS=Arachis hypogaea OX=3818 GN=atpA PE=3 SV=1				10.3093		39.5572	12.3434	Mitochondrion
N1NFX5	55804	Protein kinase OS=Arachis duranensis OX=130453 GN=ARAX_ADH079023-072J06-002 PE=4 SV=1	1.51205						9.63411	Nucleus
A0A290G0J8	55816.5	Resistance protein (Fragment) OS=Arachis hypogaea OX=3818 PE=2 SV=1					2.83693	5.08127	6.87245	Cell membrane
A0A385H5K6	55887.6	Protein DETOXIFICATION OS=Arachis hypogaea OX=3818 GN=FRDL1 PE=3 SV=1				12.463	3.09205	56.7206	43.6021	Cell membrane
A0A0R4UXP7	56052.5	Glycerol-3-phosphate acyltransferase 6 OS=Arachis hypogaea OX=3818 GN=GPAT6 PE=2 SV=1	3.25086	2.52704			3.50301		4.14431	Mitochondrion
A0A290GIE9	56063.8	Resistance protein (Fragment) OS=Arachis hypogaea OX=3818 PE=2 SV=1	2.1669	1.82014			1.92821		2.0334	Chlroplast
N1NJP9	56171.1	Putative aminotransferase family protein OS=Arachis ipaensis OX=130454 GN=ARAX_AIPA147A20-016 PE=4 SV=1					3.06437	9.2024	10.6349	Chloroplast
A0A191UJ98	56298.4	Photosystem II CP47 reaction center protein OS=Arachis hypogaea OX=3818 GN=psbB PE=3 SV=1					5.98251	6.84779		Chloroplast
G8XV93	56360.2	Acetyl-CoA carboxylase carboxyltransferase beta subunit OS=Arachis hypogaea OX=3818 PE=2 SV=1		22.7722		2.71837				Chloroplast
E6Y6S1;E6Y6S0	56364.1	Acetyl-coenzyme A carboxylase carboxyl transferase subunit beta_ chloroplastic OS=Arachis hypogaea OX=3818 GN=accD2 PE=2 SV=1		2.09209	6.01939					Chloroplast
E6Y6S0;E6Y6S1;G8XV93	56406.2	Beta-carboxyltransferase 1 OS=Arachis hypogaea OX=3818 GN=accD1 PE=2 SV=1						10.9876		Nucleus
A0A290GK39	56428.8	Resistance protein (Fragment) OS=Arachis hypogaea OX=3818 PE=2 SV=1							15.708	Cell membrane
A0A290G010	56634.9	MLO-like protein (Fragment) OS=Arachis hypogaea OX=3818 GN=MLO PE=2 SV=1					6.6927			Cell membrane
A0A290G0J4	56661.3	Resistance protein (Fragment) OS=Arachis hypogaea OX=3818 PE=2 SV=1					6.53544			Nucleus
A0A290GJU6	56690.1	Resistance protein (Fragment) OS=Arachis hypogaea OX=3818 PE=2 SV=1					2.56078			Cell membrane
I1E3D2;A0A0N7CRG1	56704.3	3-ketoacyl-CoA synthase OS=Arachis hypogaea OX=3818 GN=kcs PE=2 SV=1						9.02746		Plasma membrane
G4WJT1	56816.9	Sucrose synthase (Fragment) OS=Arachis hypogaea var. vulgaris OX=925390 GN=susy PE=2 SV=1	1.91377		1.57215		1.82263	3.3987		Chloroplast
A0A385I5T0;A0A385I5U4	57544.5	3-ketoacyl-CoA synthase OS=Arachis hypogaea OX=3818 GN=FAE1-B PE=3 SV=1	2.36428				1.96505	2.95489	3.69272	Plasma membrane
A0A290G064;A0A290GJX8	57623.8	Resistance protein (Fragment) OS=Arachis hypogaea OX=3818 PE=2 SV=1	2.57453					3.06875		Extracellular matrix
G9I5H9	57667.6	F3'H OS=Arachis hypogaea OX=3818 PE=2 SV=1	1.82113					2.76089	2.28863	Endoplasmic reticulum
Q4U4M3	57706	Subtilisin-like protease (Fragment) OS=Arachis hypogaea OX=3818 PE=2 SV=1	3.73909			2.99702		10.5114	12.2452	Cell membrane
B4YA12	58212.4	Calcium calmodulin-dependent protein kinase (Fragment) OS=Arachis hypogaea OX=3818 GN=CCaMK PE=2 SV=1	2.06561	1.64688				39.1412	7.18671	Nucleus
A0A088LHH3	58297.4	Beta-amyrin 24-hydroxylase CYP93E4 OS=Arachis hypogaea OX=3818 PE=2 SV=1							2.26386	Endoplasmic reticulum
A0A290G087	58414.1	Resistance protein (Fragment) OS=Arachis hypogaea OX=3818 PE=2 SV=1		2.26961				2.64147	28.4237	Chlroplast
O82580	58577.9	Glycinin (Fragment) OS=Arachis hypogaea OX=3818 GN=Arah3 PE=2 SV=1		1.76234			5.39665			Vacuole
Q0GM57;Q6IWG5;E5G077	58605.5	Iso-Ara h3 OS=Arachis hypogaea OX=3818 PE=2 SV=1					2.57882	2.62707	1.8578	Vacuole
J7ILM4;A0A2R2N6F0	59176.5	Natural resistance-associated macrophage protein 1 OS=Arachis hypogaea OX=3818 GN=NRAMP1 PE=2 SV=1			2.1881		1.98212		5.78553	Cell membrane
E6Y9A4	59257.8	Biotin carboxylase OS=Arachis hypogaea OX=3818 GN=BC PE=2 SV=1	2.03155			2.39585	1.63793	3.48848	17.9698	Mitochondrion
A0A290GK63	59276.6	Resistance protein (Fragment) OS=Arachis hypogaea OX=3818 PE=2 SV=1					4.08083	3.5455	14.1762	Extracellular matrix
A0A291I2L1	59392.2	O-acyltransferase OS=Arachis hypogaea OX=3818 GN=DGAT1.3 PE=2 SV=1							7.28288	Endoplasmic reticulum
A0A290FZY4	59479.2	Resistance protein (Fragment) OS=Arachis hypogaea OX=3818 PE=2 SV=1		2.72751		2.00333	3.41749	4.07859	1.89263	Nucleus
D8KXZ0	59537.8	Beta-ketoacyl-ACP synthase II-1 OS=Arachis hypogaea OX=3818 GN=KASII-1 PE=2 SV=1					5.69896	5.837		Chloroplast
E6Y6R4;E6Y6R7	59545.2	Biotin carboxylase OS=Arachis hypogaea OX=3818 GN=BC1 PE=2 SV=1		2.90627						Mitochondrion
A0A290G0A4	59667.7	Resistance protein (Fragment) OS=Arachis hypogaea OX=3818 PE=2 SV=1		2.40974						Plasma membrane
E2IQH6;P92924	59738.8	Sodium/hydrogen exchanger OS=Arachis hypogaea OX=3818 GN=NHX1 PE=2 SV=1				4.36696	11.4511			Plasmembrene
C0L2V9	59749.8	Putative reverse transcriptase OS=Arachis hypogaea OX=3818 PE=4 SV=1		1.74074	4.13458	2.5818	9.31985	1.915		Nucleus
N1NG34	60207.6	Putative mitochondrial carrier protein OS=Arachis duranensis OX=130453 GN=ARAX_ADH068E04-003 PE=3 SV=1					1.67225			Mitochondrion
N1NJM1	60407	Uncharacterized protein OS=Arachis duranensis OX=130453 GN=ARAX_ADH177M04-005 PE=4 SV=1					1.57576		3.78834	Cytoplasm
A0A290G050	60465.8	Resistance protein (Fragment) OS=Arachis hypogaea OX=3818 PE=2 SV=1					3.87378			Cell wall
A0A0M4JSI4	60480.3	O-acyltransferase OS=Arachis hypogaea OX=3818 GN=DGAT1 PE=3 SV=1							7.64304	Plasma membrane
A0A290G0A1	60599.9	Resistance protein (Fragment) OS=Arachis hypogaea OX=3818 PE=2 SV=1					6.18776		3.66281	Nucleus
Q9TK06	60609.2	Maturase K OS=Arachis pintoi OX=108216 GN=matK PE=3 SV=1						9.16827		Chloroplast
A1DZF0	60717.6	Arachin 6 OS=Arachis hypogaea OX=3818 PE=2 SV=1	6.70125			2.18943	6.06747	4.77467	13.1245	Vacuole
S5MJL6	60785.3	Calcium-dependent protein kinase (Fragment) OS=Arachis hypogaea OX=3818 GN=CPK2 PE=2 SV=2						7.95215		Cytoplasm
Q9FZ11	60790.7	Gly1 OS=Arachis hypogaea OX=3818 GN=Gly1 PE=2 SV=1	3.9715	2.26645						Vacuole
Q9TK05;A0A191UJ54;Q9TK06;B0ZB46	60851.4	Maturase K OS=Arachis major OX=108214 GN=matK PE=3 SV=1							21.0977	Nucleus
N1NKA3	60879.7	Putative arachin OS=Arachis duranensis OX=130453 GN=ARAX_ADH18B08-003 PE=3 SV=1		1.80853			6.31071		1.61483	Vacuole
B5TYU1	60965.8	Arachin Arah3 isoform OS=Arachis hypogaea OX=3818 PE=1 SV=1							1.86538	Vacuole
Q5I6T2	61077.8	Arachin Ahy-4 OS=Arachis hypogaea OX=3818 PE=2 SV=1		1.68065						Vacuole
V5T6P4	61288.8	Putative MYB-related protein 12 OS=Arachis hypogaea OX=3818 GN=MYB12 PE=4 SV=1						11.5645		Nucleus
A0A088BBQ0;A0A0M4JSI4	61458.4	O-acyltransferase OS=Arachis hypogaea OX=3818 GN=DGAT1-2 PE=2 SV=1	4.75256	3.2685			12.7232		26.4497	Plasma membrane
Q9SQH7	61467.3	Glycinin OS=Arachis hypogaea OX=3818 GN=Arah4 PE=2 SV=1							8.95267	Vacuole
A0A290G021;H6U5A0	61527.7	Resistance protein (Fragment) OS=Arachis hypogaea OX=3818 PE=2 SV=1	3.31703							Chlroplast
V5M2Y8	61531	Calcium-dependent protein kinase OS=Arachis hypogaea OX=3818 GN=CDPK PE=2 SV=1			2.27735	5.94187	2.18302		1.67577	Nucleus
Q647H3	61873.8	Arachin Ahy-2 OS=Arachis hypogaea OX=3818 PE=2 SV=1		1.69721			3.26292			Vacuole
A0A290GEH7	62141.5	Resistance protein (Fragment) OS=Arachis hypogaea OX=3818 PE=2 SV=1				2.1283		7.82693		Nucleus
A0A0R4UXR8	62621.3	Glycerol-3-phosphate acyltransferase 2 OS=Arachis hypogaea OX=3818 GN=GPAT2 PE=2 SV=1						4.59431	3.76188	Mitochondrion
N1NFZ4	63210.1	Putative mitochondrial carrier protein OS=Arachis ipaensis OX=130454 GN=ARAX_AIPA147A20-003 PE=3 SV=1						1.58871	1.89193	Mitochondrion
A0A023IUN7	63590.4	Histone deacetylase OS=Arachis hypogaea OX=3818 PE=2 SV=1	3.81449						3.08944	Chloroplast
A0A290GK49	64662.6	Resistance protein (Fragment) OS=Arachis hypogaea OX=3818 PE=2 SV=1			4.40767					Cell membrane
A0A2S0BYZ2;U3LXU9	65930.8	Nod-factor receptor 5 OS=Arachis hypogaea subsp. hypogaea OX=226205 GN=NFP PE=2 SV=1		1.85707				13.8564		Plasma membrane
G0Y6T3	66561	RNA-directed DNA polymerase OS=Arachis hypogaea OX=3818 GN=303L13_3 PE=4 SV=1			2.1695					Chloroplast
Q70KY0	67364.7	9-cis-epoxycarotenoid dioxygenase OS=Arachis hypogaea OX=3818 GN=NCED1 PE=2 SV=1					1.7046	3.82428		Chloroplast
A0A143FQT2;E2DQZ0;E2EBY7	69100.3	Zinc-binding alcohol dehydrogenase 2 OS=Arachis diogoi OX=170720 GN=ZADH2 PE=2 SV=1	2.54371				2.64511			Peroxisome
C0L2U2	69183.1	Putative mutator sub-class protein OS=Arachis hypogaea OX=3818 PE=4 SV=1					6.03745			Chloroplast
E3JPR8	69560.6	Mitogen-activated protein kinase OS=Arachis diogoi OX=170720 PE=2 SV=1	1.73449						4.5076	Cytoplasm
P43237;B3IXL2	70682.3	Allergen Ara h 1_ clone P17 OS=Arachis hypogaea OX=3818 PE=1 SV=1		2.4431			2.18197			Vacuole
N1NEW2	70719.4	Seed storage protein Ara h1 OS=Arachis duranensis OX=130453 GN=ARAX_ADH035P21-016 PE=4 SV=1		2.4431			1.58621			Vacuole
E5G076	71186.8	Ara h 1 allergen OS=Arachis hypogaea OX=3818 GN=ara h 1 PE=4 SV=1		2.31673			2.38485			Vacuole
P43238;N1NG13	71744.5	Allergen Ara h 1_ clone P41B OS=Arachis hypogaea OX=3818 PE=1 SV=1		2.31676			2.0551			Vacuole
A0A290GEG6	73631.3	Resistance protein (Fragment) OS=Arachis hypogaea OX=3818 PE=2 SV=1		1.66524	10.24					Nucleus
A0A290FZV6;A0A290G054	74387	Resistance protein (Fragment) OS=Arachis hypogaea OX=3818 PE=2 SV=1							16.3963	Glogi
A0A1S6R4X1	74704.1	Abscisic acid transporter-like protein 1 OS=Arachis hypogaea OX=3818 PE=2 SV=1					2.16965		2.75806	Cell membrane
T1Q5U1;T1Q4F7	74951.8	Yellow stripe-like transporter 3.1 OS=Arachis hypogaea OX=3818 GN=YSL3.1 PE=2 SV=1				6.28163	4.5483		88.7774	Plasma membrane
A0A109QJM5	75064	Long chain acyl-CoA synthetase 4 OS=Arachis hypogaea OX=3818 GN=LACS4 PE=2 SV=1					2.84157	4.98853		Peroxisome
A0A109Z9U2	75548.9	Long chain acyl-CoA synthetase 1 OS=Arachis hypogaea OX=3818 GN=LACS1 PE=2 SV=1	1.50576		2.02488		2.36653			Cytoplasm
G0Y6U6	76369.2	Transposon protein OS=Arachis hypogaea OX=3818 GN=303L13_16 PE=4 SV=1	2.81369	1.5515	3.36268		3.5213	3.62833		Chloroplast
Q647H1	76389.6	Conarachin OS=Arachis hypogaea OX=3818 PE=2 SV=1					5.92993		3.86904	Vacuole
G0Y6V7	78031.9	Transposon protein OS=Arachis hypogaea OX=3818 GN=205D04_7 PE=4 SV=1					2.0554			Nucleus
A0A1L2K239	79293.9	Phytochrome interacting factor 3 OS=Arachis hypogaea OX=3818 GN=PIF3 PE=2 SV=1							3.22593	Nucleus
F1AM70	79428.3	Triacylglycerol lipase 1 OS=Arachis hypogaea OX=3818 PE=2 SV=1				1.64967	6.21522			Nucleus
G0Y6U0	79493	RNA-directed DNA polymerase OS=Arachis hypogaea OX=3818 GN=303L13_10 PE=4 SV=1					2.02164			Chloroplast
A0A290G080	79640	Resistance protein (Fragment) OS=Arachis hypogaea OX=3818 PE=2 SV=1					4.70979	6.15753		Cell membrane
A0A191UJ67;A0A1C7D268;I7E3I3	80086.4	DNA-directed RNA polymerase subunit beta' OS=Arachis hypogaea OX=3818 GN=rpoC1 PE=3 SV=1	2.1206	1.54967			2.15076			Nucleus
G0Y6T7	80573.5	Copia-like polyprotein OS=Arachis hypogaea OX=3818 GN=303L13_7 PE=4 SV=1						7.15164	1.87142	Cytoplasm
A0A191UJ65	82437.4	Photosystem I P700 chlorophyll a apoprotein A2 OS=Arachis hypogaea OX=3818 GN=psaB PE=3 SV=1	2.00793		2.10845	2.03632	1.7853		28.9094	Plasma membrane
E6Y6R8	83948	Alpha-carboxyltransferase 1 OS=Arachis hypogaea OX=3818 GN=accA1 PE=2 SV=1	1.75876		2.41958			5.94262		Mitochondrion
A0A0D4CI71	84618.9	Lipoxygenase (Fragment) OS=Arachis hypogaea OX=3818 GN=LOX8_H07 PE=2 SV=1	2.79425		7.74642		2.6696	36.256	16.7892	Cytoplasm
A0A191UJB5	86041.6	NAD(P)H-quinone oxidoreductase subunit 5_ chloroplastic OS=Arachis hypogaea OX=3818 GN=ndhF PE=3 SV=1	3.15243	3.35807					4.81885	Chloroplast
A0A0A7DZM8	86281.2	CLC OS=Arachis hypogaea OX=3818 PE=2 SV=1	1.71489				1.76034		2.04148	Cell membrane
N1NFZ0	88679.4	Glycerol-3-phosphate dehydrogenase OS=Arachis duranensis OX=130453 GN=ARAX_ADH129F24-002 PE=4 SV=1			3.87285		8.34654	11.9063		Chloroplast
N1NFW5	89151.1	Uncharacterized protein OS=Arachis duranensis OX=130453 GN=ARAX_ADH167F07-004 PE=4 SV=1	1.70844	1.80054			4.96211		1.52934	Nucleus
A0A0K0KCL8	90576.5	Squamosa promoter-binding-like protein OS=Arachis hypogaea OX=3818 GN=SPL7 PE=2 SV=1							5.55603	Cytoplasm
A0A0R4VUF1	91123	Digalactosyldiacylglycerol synthase 1 OS=Arachis hypogaea OX=3818 GN=DGD1 PE=2 SV=1	2.61199				3.47566			Chloroplast
Q2HWT7;Q7Y0G7	91271.7	Phospholipase D OS=Arachis hypogaea OX=3818 GN=plda1 PE=2 SV=1	2.62604			4.15443	2.15052			Nucleus
A0A290GI17	92220.7	Resistance protein (Fragment) OS=Arachis hypogaea OX=3818 PE=2 SV=1						20.6607		Cell membrane
A0A2H4V2F5	92312.5	NBS-LRR type disease resistance protein OS=Arachis hypogaea OX=3818 PE=2 SV=1			1.89687				2.70193	Cell membrane
A0A290GKF7	92328.9	Resistance protein (Fragment) OS=Arachis hypogaea OX=3818 PE=2 SV=1					3.12032	2.63284	5.32002	Cell membrane
Q2HWT8	92397.7	Phospholipase D OS=Arachis hypogaea OX=3818 GN=plda2 PE=2 SV=1					8.398	2.64018	4.89414	Vacuole
Q4JME6	97761	Lipoxygenase OS=Arachis hypogaea OX=3818 GN=Pnlox3 PE=2 SV=1	1.63441	9.87626	3.43058	3.36299		10.1659		Cytoplasm
G0Y6V0	98717	TIR-NBS-LRR-TIR type disease resistance protein OS=Arachis hypogaea OX=3818 GN=303L13_20 PE=3 SV=1			2.79311			5.96903		Cell membrane
G0Y6V4	100720	TIR-NBS-LRR type disease resistance protein OS=Arachis hypogaea OX=3818 GN=205D04_4 PE=3 SV=1		3.55597	1.67997		6.50043			Nucleus
N1NFV5	103978	Glycoside hydrolase OS=Arachis duranensis OX=130453 GN=ARAX_ADH079023-072J06-012 PE=3 SV=1	2.03268		3.54031		8.0721		4.23905	Cell wall
E6YC17	104574	Symbiosis receptor kinase SymRK OS=Arachis hypogaea OX=3818 PE=1 SV=2	1.79572		2.51671		2.02882		4.91179	Cell wall
N1NKB6	104738	TIR NB-ARC LRR protein (Fragment) OS=Arachis duranensis OX=130453 GN=ARAX_ADH25F09-006 PE=4 SV=1			8.49892					Cell membrane
G0Y6U4	104783	Retrotransposon gag protein OS=Arachis hypogaea OX=3818 GN=303L13_14 PE=4 SV=1					3.6837		3.2646	Nucleus
I3WWD5	104902	SYMRK OS=Arachis hypogaea OX=3818 PE=2 SV=1					2.07464		4.91179	Cell membrane
N1NFY2	105408	Putative Zinc finger_ C3HC4 type (RING finger) OS=Arachis ipaensis OX=130454 GN=ARAX_AIPA147A20-009 PE=4 SV=1	2.16639				2.861	3.23641	4.95303	Nucleus
G0Y6W5	106842	TIR-NBS-LRR type disease resistance protein OS=Arachis hypogaea OX=3818 GN=205D04_15 PE=4 SV=1					3.67616			Cytoplasm
A0A0F6N504	108463	NBS-LRR type disease resistance protein OS=Arachis hypogaea OX=3818 PE=2 SV=1		2.44764	2.18133			3.4321	2.28088	Nucleus
A0A1B1H1X1	110834	Histidine kinase 1 (Fragment) OS=Arachis hypogaea OX=3818 GN=HK1 PE=2 SV=1	3.00998		1.66682					Nucleus
C9W977	111248	Phosphoenolpyruvate carboxylase OS=Arachis hypogaea OX=3818 PE=2 SV=1	1.92843		4.86977		2.15351	5.69417	56.4863	Cytoplsam
A0A0K0KBI1	112144	Squamosa promoter-binding-like protein OS=Arachis hypogaea OX=3818 GN=SPL12 PE=2 SV=1				2.54096	10.454	7.5776	5.43569	Nucleus
N1NEV1;Q2KPL9;Q2KPL7;Q2KPM0;Q2KPM1;Q2KPM5	112366	NB-ARC LRR protein OS=Arachis duranensis OX=130453 GN=ARAX_ADH25F09-001 PE=3 SV=1			2.33843			2.705	2.21478	Nucleus
N1NJL5	112491	Predicted WD40 domain containing protein OS=Arachis duranensis OX=130453 GN=ARAX_ADH123K13-001 PE=4 SV=1	1.84701		2.62962		5.84075			Nucleus
A0A0K0KCM2	115107	Squamosa promoter-binding-like protein OS=Arachis hypogaea OX=3818 GN=SPL14 PE=2 SV=1					3.65324			Nucleus
N1NFV7;Q2KPZ9	115772	TIR NB-ARC LRR protein OS=Arachis duranensis OX=130453 GN=ARAX_ADH25F09-007 PE=4 SV=1					7.56872		2.84656	Chlroplast
A0A2I4UMI9	116558	Histidine kinase 3 OS=Arachis hypogaea OX=3818 GN=HK3 PE=2 SV=1	3.74126	1.8124	3.73956			5.44448	2.06433	Nucleus
C9W981	117223	Phosphoenolpyruvate carboxylase OS=Arachis hypogaea OX=3818 GN=PEPC5 PE=2 SV=1	3.48594		1.51788			20.415		Cytoplasm
N1NJP3	120421	Cellulose synthase OS=Arachis ipaensis OX=130454 GN=ARAX_AIPA147A20-010 PE=3 SV=1					4.48375			Plasma membrane
A0A191UJ64	122071	DNA-directed RNA polymerase subunit beta OS=Arachis hypogaea OX=3818 GN=rpoB PE=3 SV=1	2.07566		2.59636		1.81116	4.38279		Nucleus
N1NJR9;N1NG01	122758	Putative gyrase protein OS=Arachis duranensis OX=130453 GN=ARAX_ADH068E04-006 PE=4 SV=1						14.6467		Chlroplast
G0Y6W2;Q6YDC6;Q2KPZ8	123060	TIR-NBS-LRR type disease resistance protein OS=Arachis hypogaea OX=3818 GN=205D04_12 PE=4 SV=1	1.75865				1.6533		2.16876	Chlroplast
A0A290G0E7	124193	Resistance protein (Fragment) OS=Arachis hypogaea OX=3818 PE=2 SV=1					3.52071		4.33028	Cell membrane
A0A286KCL1	124734	Phytochrome OS=Arachis hypogaea OX=3818 GN=phyE PE=2 SV=1	2.12209	3.42319	6.73876		10.5553	6.61693		Nucleus
E3P7J8;E3NYH1	126708	TIR-NB-LRR resistance protein OS=Arachis diogoi OX=170720 PE=2 SV=1	2.19894		9.43913		14.9744		52.5269	Cytoplasm
G0Y6T6	127944	WD40-like protein OS=Arachis hypogaea OX=3818 GN=303L13_6 PE=4 SV=1	1.94568							Golgi apparatus
G0Y6V1;Q2KQ45;Q2KQ67	128316	NBS-LRR type disease resistance protein OS=Arachis hypogaea OX=3818 GN=205D04_1 PE=3 SV=1					2.35806	4.35011		Cell membrane
A0A109NWZ2	129469	Phytochrome OS=Arachis hypogaea OX=3818 GN=phyB PE=2 SV=1						6.24886		Chlroplast
N1NEU8	130267	Uncharacterized protein OS=Arachis duranensis OX=130453 GN=ARAX_ADH18B08-005 PE=4 SV=1							8.12264	Chloroplast
A0A2I4UIV5	140830	Histidine kinase 2 OS=Arachis hypogaea OX=3818 GN=HK2 PE=2 SV=1	2.5206							Nucleus
D8KXX2	149832	AO2 OS=Arachis hypogaea OX=3818 PE=2 SV=1	2.83971				12.0172		4.00915	Chloroplast
C6EQC7	152117	Aldehyde oxidase OS=Arachis hypogaea OX=3818 GN=AhAO1 PE=2 SV=1				3.27172	2.47073		5.71955	Nucleus
A0A191UJ63;A0A2Z5HWE5	158005	DNA-directed RNA polymerase subunit beta'' OS=Arachis hypogaea OX=3818 GN=rpoC2 PE=3 SV=1	1.65506				2.94275		1.71865	Nucleus
N1NJR4	161213	Putative glycosyl phosphatidyl inositol transamidase like protein OS=Arachis duranensis OX=130453 GN=ARAX_ADH068E04-001 PE=4 SV=1	3.48817		34.7818				67.202	Chloroplast
G0Y6X0	185129	Uncharacterized protein OS=Arachis hypogaea OX=3818 GN=205D04_20 PE=4 SV=1					8.56428			Nucleus
G0Y6U9	185283	RNA-directed DNA polymerase OS=Arachis hypogaea OX=3818 GN=303L13_19 PE=4 SV=1					1.67053		6.27019	Chloroplast
A0A1C7D2B7;A0A191UJB2	211002	Protein TIC 214 OS=Arachis hypogaea OX=3818 GN=ycf1 PE=3 SV=1			3.72787					Plasma membrane
A0A0H4M677;A0A0H4LQC5	222884	NBS-LRR type disease resistance protein OS=Arachis hypogaea OX=3818 GN=PDR1 PE=2 SV=1	1.50902							Nucleus
G0Y6W1	224533	TIR-NBS-LRR type disease resistance protein OS=Arachis hypogaea OX=3818 GN=205D04_11 PE=3 SV=1		1.81341				5.86556		Cell membrane

## Sheet: Table S8
Table S8. Proteins up-regulated in WT controls showing upregulated proteins following infection with A. flavus
Accession	Mass	Description	Fold change over RNAi transgenic lines				Fold change observed at different stages of infection compared to 0h			Subcellular localization
			0 h	30 h	48 h	72 h	30 h	48 h	72 h
A0A385NX43	3968.6	Actin (Fragment) OS=Colletotrichum truncatum OX=5467 GN=ACT PE=4 SV=1		1.74281			17.5771			NA
Q5QET7	4577.82	Uncharacterized protein (Fragment) OS=Arachis hypogaea OX=3818 PE=2 SV=1					5.14083			NA
E3NYH2	5471.82	Thaumatin-like protein (Fragment) OS=Arachis diogoi OX=170720 PE=2 SV=1							56.862	NA
Q06H35	6898.97	Thioredoxin family Trp26-like protein (Fragment) OS=Arachis hypogaea OX=3818 PE=2 SV=1			4.10907			1.91146		Chloroplast
Q5QEU1	6948.03	Uncharacterized protein (Fragment) OS=Arachis hypogaea OX=3818 PE=2 SV=1					1.92899	3.20763		Nucleus
G0Y6W6	7060.74	Uncharacterized protein OS=Arachis hypogaea OX=3818 GN=205D04_16 PE=4 SV=1		2.23265				3.58302		Nucleus
Q850G3	7091.54	Putative cold stress responsive protein (Fragment) OS=Arachis hypogaea OX=3818 GN=Gsi-83 PE=2 SV=1					7.40477			Nucleus
B4UWD3	7431.36	Putative mitochondrial ATP synthase (Fragment) OS=Arachis hypogaea OX=3818 PE=2 SV=1					85.9632			Mitochondrion
E2DTW7	7535.31	Putative late embryogenesis abundant protein (Fragment) OS=Arachis diogoi OX=170720 PE=2 SV=1		2.47426						Nucleus
P01067	7593.19	Bowman-Birk type proteinase inhibitor B-II OS=Arachis hypogaea OX=3818 PE=1 SV=1		3.32477						Golgi apparatus
E5FHY5	7613.34	Late embryogenesis abundant protein group 3 protein OS=Arachis hypogaea OX=3818 GN=LEA3-2 PE=2 SV=1				1.50511				Nucleus
E2DZP5	7868.96	Putative retrotransposon protein (Fragment) OS=Arachis diogoi OX=170720 PE=2 SV=1						2.70689		Chloroplast
Q2PXN5	8020.22	RW1-like protein (Fragment) OS=Arachis hypogaea OX=3818 PE=2 SV=1			2.36387		6.91865		13.0632	Mitochondrion
B1N767;A0A2I8B285;B3FCL8;C1JGZ8;F2VJZ8	8152.99	Beta-tubulin (Fragment) OS=Aspergillus flavus OX=5059 GN=benA PE=4 SV=1					21.7575	6.01493		Cytoskeleton
Q941P3	8223.52	Putative flavonol 3-o-glucosyltransferase (Fragment) OS=Arachis hypogaea OX=3818 GN=Gdi15 PE=2 SV=1			2.06152					Mitochondrion
Q5QEU2	8306.1	Ferredoxin (Fragment) OS=Arachis hypogaea OX=3818 PE=2 SV=1						32.9237		Chloroplast
Q49MT5;C0IPM1	8345.22	Calmodulin (Fragment) OS=Neosartorya fumigata OX=746128 GN=CMD PE=4 SV=1				1.84922				Cell membrane
N1NKD7	8370.48	Uncharacterized protein OS=Arachis duranensis OX=130453 GN=ARAX_ADH035P21-019 PE=4 SV=1			8.53186					Nucleus
Q5QET3	8391.83	Auxin-induced putative CP12 domain-containing protein (Fragment) OS=Arachis hypogaea OX=3818 PE=2 SV=1				1.77436				Chloroplast
B3EWP3	8422.49	Defensin 1 (Fragment) OS=Arachis hypogaea OX=3818 PE=1 SV=1			22.6957					Nucleus.
E2DZQ2	8440.79	Retrotransposon gag protein (Fragment) OS=Arachis diogoi OX=170720 PE=2 SV=1						6.30899		Cell membrane
G0KWM3	8504.16	Putative protease (Fragment) OS=Arachis diogoi OX=170720 PE=2 SV=1				3.59855			3.28969	Nucleus
Q6Y4S5	8684.78	Antifungal protein defensin OS=Arachis diogoi OX=170720 PE=2 SV=1							553.803	Nucleus
C0HJZ1	8821	Defensin 3 OS=Arachis hypogaea OX=3818 PE=1 SV=1				2.35624	2.25023			Nucleus
B4UWA0	8860.18	Uncharacterized protein OS=Arachis hypogaea OX=3818 PE=2 SV=1			3.32398					Nucleus
Q2PXN3	8897.91	Disease resistance response protein (Fragment) OS=Arachis hypogaea OX=3818 PE=2 SV=1		1.71934						Nucleus
E2DQY9	8917.75	Heat shock protein DnaJ (Fragment) OS=Arachis diogoi OX=170720 PE=2 SV=1			2.57215					Cytoplasm
A0A1B1XWN8	9069.13	Two-component response regulator 9 (Fragment) OS=Arachis hypogaea OX=3818 GN=RR9 PE=2 SV=1	3.21047							Nucleus
E2E6R5	9434.5	Uncharacterized protein (Fragment) OS=Arachis diogoi OX=170720 PE=2 SV=1		2.04793				13.9095		Nucleus
E2DZQ3	9500.54	Uncharacterized protein (Fragment) OS=Arachis diogoi OX=170720 PE=2 SV=1		1.51104						Nucleus
Q5QET8	9686.01	Auxin-induced putative aldo/keto reductase family protein (Fragment) OS=Arachis hypogaea OX=3818 PE=2 SV=1			3.81403		7.52127			Nucleus
B3EWP4	9704.1	Defensin 2 (Fragment) OS=Arachis hypogaea OX=3818 PE=1 SV=1			1.90931					Vacuole
A0A1B1XWN1	9922.43	Two-component response regulator 5 (Fragment) OS=Arachis hypogaea OX=3818 GN=RR5 PE=2 SV=1		1.5833						Nucleus
G0KWM2	10076.3	Uncharacterized protein (Fragment) OS=Arachis diogoi OX=170720 PE=2 SV=1			1.938	1.98006		25.5937		Chloroplast
E2DZJ6	10107.6	Putative mutator sub-class protein (Fragment) OS=Arachis diogoi OX=170720 PE=2 SV=1					11.3674			Cell membrane
N1NF13	10169.3	Uncharacterized protein OS=Arachis hypogaea OX=3818 GN=ARAX_AHF417E07-019 PE=4 SV=1			2.87453				45.9012	Nucleus
E5FHZ6	10216	Late embryogenesis abundant protein group 8 protein OS=Arachis hypogaea OX=3818 GN=LEA8-1 PE=2 SV=1				8.66589		5.07812		Nucleus
Q5XXY3	10366.3	PR protein 4A (Fragment) OS=Arachis hypogaea OX=3818 PE=2 SV=1			8.3109					Cell wall
Q850G8	10396.3	Putative lea 1 OS=Arachis hypogaea OX=3818 GN=Gsi-13 PE=2 SV=1					3.14994			Nucleus
E3NYU0	10396.8	Rubisco activase (Fragment) OS=Arachis diogoi OX=170720 PE=2 SV=1			3.60867			6.01821		Chloroplast
G0Y6T9	10497.5	Uncharacterized protein OS=Arachis hypogaea OX=3818 GN=303L13_9 PE=4 SV=1							16.327	Nucleus
A0A158UVM4	10593.6	50S ribosomal protein L23_ chloroplastic OS=Arachis hypogaea OX=3818 GN=rpl23 PE=3 SV=1					5.46456			Chloroplast
A0A191UJA6	10640.5	30S ribosomal protein S19_ chloroplastic OS=Arachis hypogaea OX=3818 GN=rps19 PE=3 SV=1					22.1792			Cell membrane Cytoplasm
A0A1D8QQ19;A0A1D8QQ43;A0A173DXQ3;A0A173DXQ4;A0A173DXQ5;A0A286R2Z7;A0A286R3E5;A9XF85;B3TNJ0;C0IPM1;Q49MT5	10753.9	Calmodulin (Fragment) OS=Aspergillus amstelodami OX=5054 GN=CMD PE=4 SV=1						4.29596		Chloroplast
E5BDA5	10760.1	Cysteine proteinase inhibitor OS=Arachis hypogaea OX=3818 GN=cystatin PE=3 SV=1				2.50996	12.73			Chloroplast
A0A191UJC3	10794.7	30S ribosomal protein S15_ chloroplastic OS=Arachis hypogaea OX=3818 GN=rps15 PE=3 SV=1							11.4426	Cell membrane
G0UIN9;B3GR01;Q647G6;E0WN93	10836.2	Cysteine proteinase inhibitor OS=Arachis hypogaea OX=3818 GN=cst PE=3 SV=1							11.4842	Cell membrane
E2EAJ9	10884.3	Uncharacterized protein (Fragment) OS=Arachis diogoi OX=170720 PE=2 SV=1							3.67198	Cytoplasm
E3NYS7	10949.5	Putative LysM receptor kinase (Fragment) OS=Arachis diogoi OX=170720 PE=2 SV=1			2.90004					Cell membrane
A0A173DXQ2;A0A173DXN4;A0A173DXN9;A0A173DXP4;A0A173DXP6;A0A173DXP9;A0A173DXQ7;A0A173DXR1;A0A173DXQ3;A0A173DXQ4;A0A173DXQ5;A0A1D8QQ19;A0A1D8QQ43;A0A286R2Z7;A0A286R3E5;A9XF85;B3TNJ0;C0IPM1;Q49MT5	11041.3	Calmodulin (Fragment) OS=Aspergillus chevalieri OX=182096 GN=CMD PE=4 SV=1			2.83539					Nucleus
E2E6R6	11074.6	Uncharacterized protein (Fragment) OS=Arachis diogoi OX=170720 PE=2 SV=1	2.10545							Cell membrane
A0A1B1XWN5	11109.8	Retinoblastoma-related protein 1 (Fragment) OS=Arachis hypogaea OX=3818 GN=RBR1 PE=2 SV=1					3.96299			Nucleus
B4UWC2	11122.3	Gonadotropin beta chain OS=Arachis hypogaea OX=3818 PE=2 SV=1			2.39357					Nucleus
B4UW65	11219.7	ES43-like protein (Fragment) OS=Arachis hypogaea OX=3818 PE=2 SV=1			3.01178					Cell wall
B4UW72	11255.8	Fiber protein Fb15 (Fragment) OS=Arachis hypogaea OX=3818 PE=2 SV=1					51.7634			Chloroplast
M4T4A6	11272.6	Uncharacterized protein OS=Arachis hypogaea OX=3818 PE=2 SV=1			2.62043					Nucleus
B4UW66	11285.8	Uncharacterized protein (Fragment) OS=Arachis hypogaea OX=3818 PE=2 SV=1		2.41688						Cell membrane
N1NKB0	11509.5	Putative permease/transmembrane protein OS=Arachis duranensis OX=130453 GN=ARAX_ADH18B08-009 PE=4 SV=1		1.54093	3.64734					Nucleus
N1NJK2	11514.9	Uncharacterized protein OS=Arachis duranensis OX=130453 GN=ARAX_ADH51I17-83F22-007 PE=4 SV=1		1.84701					32.6265	Cell membrane
Q2HP13	11521	Resistance protein Cf (Fragment) OS=Arachis hypogaea OX=3818 PE=4 SV=1						8.47991		Nucleus
E2DTX0	11640.1	Exostosin-like protein (Fragment) OS=Arachis diogoi OX=170720 PE=2 SV=1		1.72293						Cell membrane
N1NFW7;N1NKI0	11665.2	Uncharacterized protein OS=Arachis duranensis OX=130453 GN=ARAX_ADH035P21-015 PE=4 SV=1						1.92435		Chloroplast
E3NYV1	11742.5	Uncharacterized protein (Fragment) OS=Arachis diogoi OX=170720 PE=2 SV=1			2.32702					Nucleus
E2E6S1	11747.3	Putative microtubule-associated protein (Fragment) OS=Arachis diogoi OX=170720 PE=2 SV=1			3.56107			4.42826		Chloroplast
P86349	11954.4	Elongation factor G_ chloroplastic (Fragments) OS=Arachis hypogaea OX=3818 PE=1 SV=1			2.47968					Nucleus
J7EKA8	12036.9	Cyclin B (Fragment) OS=Arachis hypogaea OX=3818 GN=CYCB1 PE=2 SV=1					4.53476			Cell wall
E3NYI7;B6CEX8;E3NYU6	12051	Non-specific lipid-transfer protein OS=Arachis diogoi OX=170720 PE=2 SV=1						4.71131		Nucleus
N1NEU2	12157.5	Uncharacterized protein OS=Arachis duranensis OX=130453 GN=ARAX_ADH18B08-023 PE=4 SV=1					34.5595			Cell membrane
A0A290GKI2	12209.9	Resistance protein (Fragment) OS=Arachis hypogaea OX=3818 PE=2 SV=1			3.82343			58.8824		Nucleus
H6U5A1	12341.1	Hypersensitive-induced response protein (Fragment) OS=Arachis hypogaea OX=3818 PE=2 SV=1		1.70993			105.174			Chloroplast
D8KYG1	12426	Uncharacterized protein (Fragment) OS=Arachis diogoi OX=170720 PE=2 SV=1			1.9087					Golgi apparatus
B4UW90	12429.7	Heat shock protein 3 (Fragment) OS=Arachis hypogaea OX=3818 PE=2 SV=1			1.57756			4.44532		Golgi apparatus
B4UW77	12568.4	Gibberellin-regulated protein OS=Arachis hypogaea OX=3818 PE=2 SV=1		1.60778	1.94169					Nucleus
E3NYG6	12656.2	Putative CBL-interacting protein kinase (Fragment) OS=Arachis diogoi OX=170720 PE=2 SV=1		2.64809			209.294			Chloroplast
B4UWA5	12781.6	Uncharacterized protein OS=Arachis hypogaea OX=3818 PE=2 SV=1				2.8058		11.7056		Nucleus
Q06H30	12965.2	Auxin-induced protein (Fragment) OS=Arachis hypogaea OX=3818 PE=2 SV=1			3.27154					Cell membrane
E3NYU1	13012.3	Uncharacterized protein (Fragment) OS=Arachis diogoi OX=170720 PE=2 SV=1					7.12095			Cell wall
D4NXQ7	13146.9	Germin-like protein subfamily 2 member 3 (Fragment) OS=Arachis hypogaea OX=3818 GN=GLP8 PE=2 SV=1			5.02756			2.60846		Nucleus
N1NJJ6	13248.9	Uncharacterized protein OS=Arachis duranensis OX=130453 GN=ARAX_ADH035P21-018 PE=4 SV=1			2.85474					Cytoskeleton
A0A173DXP5;A0A173DXN8;A0A173DXP1;A0A173DXP7;A0A173DXP8;A0A173DXQ8;A0A173DXQ9;A0A173DXS3;A0A1B2AIH3;A0A1B2AIH8;A0A1B2AIN0;M4T976	13283.8	Beta-tubulin (Fragment) OS=Aspergillus amstelodami OX=5054 GN=B-tub PE=4 SV=1			2.66078					Nucleus
N1NFU7	13299	Uncharacterized protein OS=Arachis duranensis OX=130453 GN=ARAX_ADH18B08-004 PE=4 SV=1							31.9397	Nucleus
K7Y9D8	13323.4	Histone H3 (Fragment) OS=Colletotrichum truncatum OX=5467 GN=H3 PE=3 SV=1					9.11656			Chloroplast
N1NJL1	13345.9	Uncharacterized protein OS=Arachis duranensis OX=130453 GN=ARAX_ADH079023-072J06-013 PE=4 SV=1			23.1551					Nucleus
Q45W71	13459.3	Auxin-repressed protein OS=Arachis hypogaea OX=3818 PE=2 SV=1					4.87746			Nucleus
Q06H38	13460.9	Syringolide-induced protein 14-1-1 (Fragment) OS=Arachis hypogaea OX=3818 PE=2 SV=1			3.30829					Nucleus
N1NKC3;N1NJN2	13467	Uncharacterized protein OS=Arachis duranensis OX=130453 GN=ARAX_ADH035P21-008 PE=4 SV=1			1.59063				28.4937	Nucleus
B1PMD1	13503.1	Zinc finger protein ZFP133 OS=Arachis hypogaea OX=3818 PE=2 SV=1		1.86521				3.29635		Cell membrane
G0KWM1	13531.5	NB-LRR type disease resistance protein Rps1-k-1 (Fragment) OS=Arachis diogoi OX=170720 PE=2 SV=1			3.55233		2.55958			Chloroplast
A0A191UJD1	13657.6	Hypothetical chloroplast RF68 OS=Arachis hypogaea OX=3818 GN=ycf68 PE=4 SV=1							115.453	Chloroplast
Q850G5	13883	Putative caffeic acid methyl transferase (Fragment) OS=Arachis hypogaea OX=3818 GN=Gsi-75 PE=2 SV=1			2.54559					Cytoplasm
Q2KPR3	13894	Resistance protein PRG (Fragment) OS=Arachis hypogaea OX=3818 PE=4 SV=1	5.09996					5.1503		Chloroplast
E3NYH7	14003.2	1-deoxy-D-xylulose 5-phosphate synthase (Fragment) OS=Arachis diogoi OX=170720 PE=2 SV=1			3.84176					Nucleus
N1NKI6	14166.4	Uncharacterized protein OS=Arachis ipaensis OX=130454 GN=ARAX_AIPA147A20-011 PE=4 SV=1						2.86297		Cytoskeleton
L7QH52;D3K177	14219.2	Profilin OS=Arachis hypogaea OX=3818 GN=Ara h 5 PE=2 SV=1			7.6053					Chloroplast
E3NYU8	14222.5	30S ribosomal protein S13-1 (Fragment) OS=Arachis diogoi OX=170720 PE=2 SV=1		2.81713						Cell membrane
Q45W87	14307.8	Oleosin 1 OS=Arachis hypogaea OX=3818 PE=2 SV=1					1.77614		143.972	Cytoplasm and Cytosol
B4UWD2	14324	Myo-inisitol oxygenase (Fragment) OS=Arachis hypogaea OX=3818 PE=2 SV=1							40.648	Cytoplasm
Q2YHR1	14385.4	Pathogenesis-related protein 10 (Fragment) OS=Arachis hypogaea OX=3818 GN=PR10 PE=2 SV=1						3.17387		Cytoplasm and Cytosol
E3NYH5	14387.4	S-adenosyl methionine synthase (Fragment) OS=Arachis diogoi OX=170720 PE=2 SV=1						26.6231		Cytoplasm
A0A0F7CUC2	14544.6	Annexin (Fragment) OS=Arachis hypogaea OX=3818 GN=AnnAh4 PE=2 SV=1			14.0788		1.91738	5.42637		Nucleus
Q2KPM6	14656.9	Resistance protein PRG (Fragment) OS=Arachis hypogaea OX=3818 PE=4 SV=1			1.97564		3.67731	2.80069		Nucleus
G0Y6U3	14714.9	Uncharacterized protein OS=Arachis hypogaea OX=3818 GN=303L13_13 PE=4 SV=1					3.43383			Chloroplast
E3NYU3	14810	Chloroplast oxygen-evolving protein (Fragment) OS=Arachis diogoi OX=170720 PE=2 SV=1					3.70921	25.1396		Chloroplast
A0A191UJ51	14817.1	ATP synthase epsilon chain_ chloroplastic OS=Arachis hypogaea OX=3818 GN=atpE PE=3 SV=1					9.88275		4.95061	Chloroplast
H9L7W2	14819.7	Acyl carrier protein OS=Arachis hypogaea OX=3818 GN=ACP PE=2 SV=1					18.7237	3.27183		Nucleus
Q45W78;A0A343LN25	14901.4	Ubiquitin fusion protein OS=Arachis hypogaea OX=3818 PE=2 SV=1					13.3015			Nucleus
B4UW59	14919	Double-stranded DNA-binding protein OS=Arachis hypogaea OX=3818 PE=2 SV=1		1.99263					29.9822	Nucleus
A0A0K0KBH8	14971.1	Squamosa promoter-binding-like protein (Fragment) OS=Arachis hypogaea OX=3818 GN=SPL3 PE=2 SV=1			2.73198			16.5106		Chloroplast
B4UWC7	14974	Malate dehydrogenase (Fragment) OS=Arachis hypogaea OX=3818 PE=2 SV=1							87.3862	Cytoplasm
V9QFK7	15012	Glyceraldehyde-3-phosphate dehydrogenase (Fragment) OS=Cochliobolus miyabeanus OX=101162 GN=GPD PE=3 SV=1			5.66176					Nucleus
E3NYT9	15034.7	60S ribosomal protein L1 (Fragment) OS=Arachis diogoi OX=170720 PE=2 SV=1							32.8158	Chloroplast
A0A191UJA8	15049.6	30S ribosomal protein S11_ chloroplastic OS=Arachis hypogaea OX=3818 GN=rps11 PE=3 SV=1			4.94293					Nucleus
A0A290G069	15095.2	Resistance protein (Fragment) OS=Arachis hypogaea OX=3818 PE=2 SV=1	3.28953		1.58534					Cytoplasm
Q2KPR8;Q2KPR5	15161.2	Resistance protein PRG (Fragment) OS=Arachis hypogaea OX=3818 PE=4 SV=1					4.6292	4.89453		Chloroplast
Q06H28	15186.5	Photosystem I psaH protein OS=Arachis hypogaea OX=3818 PE=2 SV=1						2.46015		Chloroplast
P85086	15217.4	Ribulose bisphosphate carboxylase/oxygenase activase_ chloroplastic (Fragments) OS=Arachis hypogaea OX=3818 GN=RCA PE=1 SV=1					1.83007	3.24851		Chloroplast
E6YBQ8;E6YBR0;E6YBQ4;E6YBQ5;E6YBQ6	15309.3	Acyl carrier protein OS=Arachis hypogaea OX=3818 GN=ACP5 PE=3 SV=1						10.7737	57.9262	Chloroplast
L0HNF3	15372.9	Violaxanthin de-epoxidase (Fragment) OS=Arachis hypogaea OX=3818 PE=2 SV=1						67.4065		Nucleus
A0A290GEI9	15381.3	Resistance protein (Fragment) OS=Arachis hypogaea OX=3818 PE=2 SV=1			9.07428					Chloroplast
E2DDA6	15452.7	70 kDa heat shock protein-like protein (Fragment) OS=Arachis diogoi OX=170720 PE=2 SV=1		7.56098	5.78332			4.13591		Nucleus
E3NYG4;B4UW93	15483	HMG1 protein (Fragment) OS=Arachis diogoi OX=170720 PE=2 SV=1					8.52059			Chloroplast
B4UW68	15501.2	Putative ferredoxin (Fragment) OS=Arachis hypogaea OX=3818 PE=2 SV=1			6.76804					Chloroplast
E3NYS6	15554.1	RNA binding protein (Fragment) OS=Arachis diogoi OX=170720 PE=2 SV=1					19.5484			Nucleus
A0A0A6ZDY1	15562.5	Peptidyl-prolyl cis-trans isomerase OS=Arachis hypogaea OX=3818 PE=2 SV=1		1.51855			2.40341	20.2835		Nucleus
N1NJQ7	15565.3	Uncharacterized protein OS=Arachis ipaensis OX=130454 GN=ARAX_AIPA147A20-008 PE=4 SV=1						9.15734		Cell membrane
Q647G4	15584	Oleosin 2 (Fragment) OS=Arachis hypogaea OX=3818 PE=2 SV=1		1.59969			4.82353			Chloroplast
A0A191UJA5;A0A1C7D2C6	15632.3	50S ribosomal protein L16_ chloroplastic OS=Arachis hypogaea OX=3818 GN=rpl16 PE=3 SV=1		1.94284						Chloroplast
E2DTW4	15688	Uncharacterized protein (Fragment) OS=Arachis diogoi OX=170720 PE=2 SV=1			2.45911		105.726			Nucleus
B4UW92	15735.3	High mobility group protein 1 OS=Arachis hypogaea OX=3818 PE=2 SV=1							3.58839	Nucleus
E2DDA5	15741.6	NAD-dependent epimerase/dehydratase-like protein (Fragment) OS=Arachis diogoi OX=170720 PE=2 SV=1						2.97415		Cytoplasm
Q2KPY1;Q2KPZ1	15749	Resistance protein PLTR (Fragment) OS=Arachis hypogaea OX=3818 PE=4 SV=1							290.877	Cell membrane
E3NYH4	15795.6	Uncharacterized protein (Fragment) OS=Arachis diogoi OX=170720 PE=2 SV=1					48.2082			Nucleus
U3MF97	15862.6	40S ribosomal protein S23 OS=Arachis hypogaea OX=3818 PE=2 SV=1					2.43441	2.68589		Vacuole
E9LFE7	15873.4	7S conarachin (Fragment) OS=Arachis hypogaea OX=3818 PE=2 SV=1						10.047		Nucleus
E2EAZ1	15950.3	SWI/SNF complex subunit (Fragment) OS=Arachis diogoi OX=170720 PE=2 SV=1					6.99156			Nucleus
N1NEY5	15970.8	Hyopthetical protein OS=Arachis duranensis OX=130453 GN=ARAX_ADH179B13-006 PE=4 SV=1		3.40788						Nucleus
B4UWC5	15985.8	Mago nashi-like protein (Fragment) OS=Arachis hypogaea OX=3818 PE=2 SV=1					60.6229			Chloroplast
N1NKF7	15991.1	Glycerol-3-phosphate dehydrogenase OS=Arachis duranensis OX=130453 GN=ARAX_ADH129F24-001 PE=3 SV=1						8.29961		Cell membrane
B4UW50	15999.9	Chitinase-like protein (Fragment) OS=Arachis hypogaea OX=3818 PE=2 SV=1					9.46656	4.58915		Nucleus
Q1PCR4	16072.2	Putative IN2-1 protein (Fragment) OS=Arachis hypogaea OX=3818 PE=2 SV=1							215.798	Cell membrane
Q2PXN9;E5FHZ5	16169.6	Dessication protectant protein LEA 14 (Fragment) OS=Arachis hypogaea OX=3818 PE=2 SV=1							13.1081	Cytoskeleton
Q2PK12	16261.4	Actin depolymerizing factor-like protein OS=Arachis hypogaea OX=3818 PE=2 SV=1					1.60912	1.78052		Nucleus
Q2PXN2	16266.3	17.5 kDa class I HSP (Fragment) OS=Arachis hypogaea OX=3818 PE=2 SV=1					5.85473			Cytoplasm
Q0G866	16350	NBS-LRR type disease resistance protein GnRGC2 (Fragment) OS=Arachis hypogaea OX=3818 PE=4 SV=1		3.30309			8.86666			Cytoplasm
B0YIU5	16412.5	Ara h 8 allergen isoform OS=Arachis hypogaea OX=3818 PE=2 SV=1		2.95062				26.4553	13.7162	Chloroplast
N1NFX0	16432.5	Uncharacterized protein OS=Arachis hypogaea OX=3818 GN=ARAX_AHF417E07-001 PE=4 SV=1					4.91537			Cytoplasm
Q45W80	16438.9	Nucleoside diphosphate kinase OS=Arachis hypogaea OX=3818 PE=2 SV=1					2.91029		8.59302	Nucleus
E2DQY8	16446.3	Heat shock protein DnaJ N-terminal domain-containing protein (Fragment) OS=Arachis diogoi OX=170720 PE=2 SV=1				3.6945				Nucleus
E5FHY4;E5FHY5	16481.9	Late embryogenesis abundant protein group 3 protein OS=Arachis hypogaea OX=3818 GN=LEA3-1 PE=2 SV=1		1.63557					49.0892	Nucleus
H6U5A2	16551.3	Fructose-2_6-bisphosphatase (Fragment) OS=Aspergillus flavus OX=5059 PE=2 SV=1	5.56646				8.03459	8.99865		Cell wall
A0A290GI45	16575.9	Resistance protein (Fragment) OS=Arachis hypogaea OX=3818 PE=2 SV=1			2.46787					Cytoplasm
Q6R2U6	16635.4	Calmodulin OS=Arachis hypogaea OX=3818 GN=CaM2 PE=2 SV=1		3.32986						Cytoplasm
Q2KQ09	16703.9	Resistance protein PLTR (Fragment) OS=Arachis hypogaea OX=3818 PE=4 SV=1							16.4866	Nucleus.
A0A290GJW8;A0A290G0G2	16779.9	Resistance protein (Fragment) OS=Arachis hypogaea OX=3818 PE=2 SV=1		2.07683						Chloroplast
G0Y6V5	16868.3	Uncharacterized protein OS=Arachis hypogaea OX=3818 GN=205D04_5 PE=4 SV=1					7.52306			Cell membrane
B4UW96	16903.2	PRA1 family protein (Fragment) OS=Arachis hypogaea OX=3818 PE=2 SV=1			87.6971					Chloroplast
E2D2C6	16908.8	Glutathione-regulated potassium-efflux system protein KefB-like protein (Fragment) OS=Arachis diogoi OX=170720 PE=2 SV=1		1.96027						Cytoplasm
B1PYZ4	16910.3	Ara h 8 allergen isoform 3 OS=Arachis hypogaea OX=3818 PE=3 SV=1							80.3457	Cytoplasm
Q06H19	16918.7	UDP-glucose pyrophosphorylase (Fragment) OS=Arachis hypogaea OX=3818 PE=2 SV=1			2.00571		6.38726			Cytoplasm
Q0PKR4	16925.2	Pathogenesis-related protein 10 OS=Arachis hypogaea OX=3818 PE=2 SV=1						14.3455	63.8129	Cell membrane
Q647G3	16932.2	Oleosin OS=Arachis hypogaea OX=3818 PE=2 SV=1						17.8537		Cytoplasm
Q6VT83	16952.3	Ara h 8 allergen OS=Arachis hypogaea OX=3818 PE=1 SV=1							15.8036	Chloroplast
C0L2W0	17025.1	Putative reverse transcriptase OS=Arachis hypogaea OX=3818 PE=4 SV=1				2.80035				Chloroplast
E5FHZ5	17097.7	Late embryogenesis abundant protein group 7 protein OS=Arachis hypogaea OX=3818 GN=LEA7-1 PE=2 SV=1			2.6685		10.242	17.983		Vacuole
Q06H39	17099.5	Syntaxin (Fragment) OS=Arachis hypogaea OX=3818 PE=2 SV=1	2.0501	1.9348		4.02186	12.5188	3.59029	35.793	Cytoplasm
E2E6R2	17181.2	Uncharacterized protein (Fragment) OS=Arachis diogoi OX=170720 PE=2 SV=1			2.66291			5.16408		Nucleus
E5FHZ0;Q2PXN4	17232.8	Late embryogenesis abundant protein group 4 protein OS=Arachis hypogaea OX=3818 GN=LEA4-2 PE=2 SV=1		1.85299			1.70095	10.3913		Nucleus
A1DZE9	17346.4	Conglutin 8 OS=Arachis hypogaea OX=3818 PE=2 SV=1							72.8438	Cytoplasm
B4UW78	17388.6	Glutamine synthetase GS56 (Fragment) OS=Arachis hypogaea OX=3818 PE=2 SV=1							105.97	Cytoplasm
B4UWD9	17428.5	Threonine endopeptidase (Fragment) OS=Arachis hypogaea OX=3818 PE=2 SV=1			3.21401				88.672	Nucleus
A0A290G016	17433.7	Resistance protein (Fragment) OS=Arachis hypogaea OX=3818 PE=2 SV=1					28.2284			Cell membrane
Q45W69	17486.5	Uncharacterized protein OS=Arachis hypogaea OX=3818 PE=2 SV=1						99.1471		Cell membrane
A5Z1Q6;A5Z1R0;Q647G9;A5Z1Q5	17490.5	Ara i 6 OS=Arachis ipaensis OX=130454 GN=Ara i 6 PE=2 SV=1						5.12633		Cell membrane
Q647G9;A5Z1Q6;A5Z1R0	17490.5	Conglutin OS=Arachis hypogaea OX=3818 PE=1 SV=1							85.3123	Nucleus
A5Z1Q5	17491.5	Ara d 6 OS=Arachis duranensis OX=130453 GN=Ara d 6 PE=2 SV=1							85.6513	Endoplasmic reticulum
E3JPR7;G9HPX7	17495.8	ADP-ribosylation factor (Fragment) OS=Arachis diogoi OX=170720 PE=2 SV=1			8.28655					Cytoplasm
Q06H32;B4UWE4	17536.2	Thioredoxin fold OS=Arachis hypogaea OX=3818 PE=2 SV=1					9.93413	6.38202		Chloroplast
N1NFZ5	17688.7	Uncharacterized protein OS=Arachis duranensis OX=130453 GN=ARAX_ADH179B13-002 PE=4 SV=1					3.88635			Chloroplast
J7LMM2	17713.8	Eukaryotic translation initiation factor 5A OS=Arachis hypogaea OX=3818 GN=IF5A PE=2 SV=1						2.99163		Cell membrane
Q647G5	17809.6	Oleosin 17.8 OS=Arachis hypogaea OX=3818 PE=2 SV=2					1.90369		18.3328	Cytoplasm
Q6YD99	17824.5	Resistance protein (Fragment) OS=Arachis stenosperma OX=217475 PE=4 SV=1		2.30939				12.1867		Nucleus
C0L2U7	17861.8	Uncharacterized protein OS=Arachis hypogaea OX=3818 PE=4 SV=1		2.41935	3.42896					Cytoplasm
Q6YDG7	17866.4	Resistance protein (Fragment) OS=Arachis duranensis OX=130453 PE=4 SV=1		3.65193				12.1667		Nucleus
Q06H21	17879.7	Ubiquitin/ribosomal protein S27a OS=Arachis hypogaea OX=3818 PE=2 SV=1				30.9097			27.5833	Nucleus
E5FHY9	17921.6	Late embryogenesis abundant protein group 4 protein OS=Arachis hypogaea OX=3818 GN=LEA4-1 PE=2 SV=1		1.82609	1.87365					Nucleus
B4UW48	17922.9	Uncharacterized protein (Fragment) OS=Arachis hypogaea OX=3818 PE=2 SV=1						92.7197		Cytoplasm
B2LR79	17932.5	NBS-LRR type disease resistance protein GnRGC5a (Fragment) OS=Arachis hypogaea OX=3818 PE=4 SV=1			3.54042					Cytoplasm
Q6YDA4	17934.4	Resistance protein (Fragment) OS=Arachis stenosperma OX=217475 PE=4 SV=1			2.23565			8.8113		Chloroplast
Q0PCD6	17942.4	NBS-LRR type disease resistance protein GnRGC1 (Fragment) OS=Arachis hypogaea OX=3818 PE=4 SV=1			2.7797		4.80567	10.0128		Cytoplasm
Q2KPM7;Q2KPP7	17956.4	Resistance protein PRG (Fragment) OS=Arachis hypogaea OX=3818 PE=4 SV=1							3.23587	Cytoplasm
A0A342LJ68	17978	Non-symbiotic hemoglobin OS=Arachis hypogaea OX=3818 GN=GLB1 PE=2 SV=1		1.64228			3.58712	2.75605		Nucleus
E5FHY6	18003.2	Late embryogenesis abundant protein group 3 protein (Fragment) OS=Arachis hypogaea OX=3818 GN=LEA3-3 PE=2 SV=1					2.88917			Cytoplasm
Q6YDC5	18013.5	Resistance protein (Fragment) OS=Arachis stenosperma OX=217475 PE=4 SV=1					4.64522			Cell membrane
N1NG02	18014.3	Uncharacterized protein OS=Arachis hypogaea OX=3818 GN=ARAX_AHF417E07-004 PE=3 SV=1						24.8166		Cytoplasm
Q0PCD3	18050.6	NBS-LRR type disease resistance protein GnRGC5 (Fragment) OS=Arachis hypogaea OX=3818 PE=4 SV=1					1.86365			Nucleus
B4UW89;B4UW88	18100.5	Heat shock protein 2 OS=Arachis hypogaea OX=3818 PE=2 SV=1					3.36011	30.0647		Nucleus
Q45W76	18108.5	Ubiquitin-conjugating enzyme 2 OS=Arachis hypogaea OX=3818 PE=2 SV=1							9.7323	Nucleus
A0A0K0KBG8	18109.4	Squamosa promoter-binding-like protein OS=Arachis hypogaea OX=3818 GN=SPL3 PE=2 SV=1					3.18304	4.26574		Cytoplasm
Q6YDC4	18122.3	Resistance protein (Fragment) OS=Arachis stenosperma OX=217475 PE=4 SV=1						3.8364		Cytoplasm
Q6YDA3	18123.7	Resistance protein (Fragment) OS=Arachis stenosperma OX=217475 PE=4 SV=1			1.86518				20.6394	Cytoplasm
B4UW75	18246.9	Gibberellin 2-oxidase (Fragment) OS=Arachis hypogaea OX=3818 PE=2 SV=1		1.73776					490.72	Cytoplasm
Q6YDF8	18252.6	Resistance protein (Fragment) OS=Arachis cardenasii OX=51121 PE=4 SV=1						4.58973	11.1128	Cytoplasm
Q2KPX1	18253.7	Resistance protein PLTR (Fragment) OS=Arachis hypogaea OX=3818 PE=4 SV=1			2.71297					Cytoplasm
Q6YDB7;Q6YDF9;B2LR84;Q2KPL6;Q2KPN5;Q2KPK8;Q6YDE9;Q2KPM2;Q2KPQ1;Q2KPN2;Q2KPS1;Q2KPK1	18261.6	Resistance protein (Fragment) OS=Arachis stenosperma OX=217475 PE=4 SV=1				2.80357				Vacuole
Q45W79	18302.4	Calcium-binding pollen allergen OS=Arachis hypogaea OX=3818 PE=2 SV=1		1.67386		2.18875		7.32801		Chloroplast
A0A075M3P5;A0A075M3Q0;A0A075M514;A0A075M595;A0A075M9A6;A0A075M9B7;A0A075M4V7;A0A075M4W4	18304.9	Ribulose bisphosphate carboxylase small chain (Fragment) OS=Arachis duranensis OX=130453 GN=rbcS PE=3 SV=1			2.26486					Cytoplasm
Q6YDF2	18312.8	Resistance protein (Fragment) OS=Arachis cardenasii OX=51121 PE=4 SV=1			2.85318		6.6033		5.15217	Cytoplasm
Q6YDD1	18317	Resistance protein (Fragment) OS=Arachis cardenasii OX=51121 PE=4 SV=1			32.2971					Cytoplasm
A0A0A6ZDN9;E3NYI6;G9HPX8	18329.7	Peptidyl-prolyl cis-trans isomerase OS=Arachis hypogaea OX=3818 PE=2 SV=1	1.60032							Cytoplasm
Q0PCD0	18358	NBS-LRR type disease resistance protein GnRGC8 (Fragment) OS=Arachis hypogaea OX=3818 PE=4 SV=1			1.70866					Nucleus
H6U5A7	18446.7	DNA lyase (Fragment) OS=Aspergillus flavus OX=5059 PE=2 SV=1					3.53567			Nucleus
N1NFY5	18487.3	Uncharacterized protein OS=Arachis duranensis OX=130453 GN=ARAX_ADH079023-072J06-015 PE=4 SV=1					2.02755	27.6118		Cell membrane
Q9AXI1;Q6J1J8;Q9AXI0	18492.5	Oleosin variant A OS=Arachis hypogaea OX=3818 PE=2 SV=1					1.84936			Cytoplasm
Q6YDF4	18507.1	Resistance protein (Fragment) OS=Arachis cardenasii OX=51121 PE=4 SV=1						14.2788	2.49504	Cytoplasm
B2LR83	18514.1	NBS-LRR type disease resistance protein GnRGC8a (Fragment) OS=Arachis hypogaea OX=3818 PE=4 SV=1					2.40482			Cell membrane
Q9AXI0	18514.5	Oleosin variant B OS=Arachis hypogaea OX=3818 PE=2 SV=1			4.96328					Cytoplasm
Q2KQ21;Q2KQ17;Q2KQ19;Q2KQ25	18566.9	Resistance protein PLTR (Fragment) OS=Arachis hypogaea OX=3818 PE=4 SV=1	1.98915					4.17405	7.99969	Cytoplasm
Q6YDG9	18569.4	Resistance protein (Fragment) OS=Arachis duranensis OX=130453 PE=4 SV=1			9.22491					Cytoplasm
Q2KPW9	18622	Resistance protein PLTR (Fragment) OS=Arachis hypogaea OX=3818 PE=4 SV=1			3.23127		2.97623	1.87605		Chloroplast
A0A191UJ62	18667.3	NAD(P)H-quinone oxidoreductase subunit J_ chloroplastic OS=Arachis hypogaea OX=3818 GN=ndhJ PE=3 SV=1					5.8341	9.95245		Nucleus
Q9SQH1	18759.8	Allergen OS=Arachis hypogaea OX=3818 GN=Ara h 7 PE=2 SV=1							14.8962	Nucleus
Q06H22	18770.1	Ubiquitin-conjugating enzyme OS=Arachis hypogaea OX=3818 PE=2 SV=1		2.45867						Cytoplasm
Q6YDF5	18790	Resistance protein (Fragment) OS=Arachis cardenasii OX=51121 PE=4 SV=1			1.50157					Nucleus
Q647G8	18797.7	2S protein 2 OS=Arachis hypogaea OX=3818 PE=2 SV=1			3.15228	10.5776	2.36711	8.2154	69.8416	Nucleus
N1NKF2	18908.3	Uncharacterized protein OS=Arachis duranensis OX=130453 GN=ARAX_ADH079023-072J06-014 PE=4 SV=1					4.06501	2.75304		Cytoplasm
Q6YDG0;Q6YDC3	18941.3	Resistance protein (Fragment) OS=Arachis cardenasii OX=51121 PE=4 SV=1	4.08048		3.76699					Chloroplast
E3NYT2	19035.1	Heat shock protein 70 (Fragment) OS=Arachis diogoi OX=170720 PE=2 SV=1					2.87244		6.33393	Vacuole
E9LFF0	19080.6	11S arachin (Fragment) OS=Arachis hypogaea OX=3818 PE=2 SV=1		1.92105	3.91929		3.35945			Cytoplasm
Q2KPN8	19170.7	Resistance protein PRG (Fragment) OS=Arachis hypogaea OX=3818 PE=4 SV=1		2.07595						Cytoplasm
Q06H31	19184.7	Translationally controlled tumor-like protein OS=Arachis hypogaea OX=3818 PE=2 SV=1					3.08361			Nucleus
A0A1B1J964	19194.4	AP2-like ethylene-responsive transcription factor ANT-like protein (Fragment) OS=Arachis hypogaea OX=3818 PE=2 SV=1					4.11546			Cell membrane
A0A290G546	19211.9	Resistance protein (Fragment) OS=Arachis hypogaea OX=3818 PE=2 SV=1						2.98267		Chloroplast
G0Y6U8	19226.7	TIR disease resistance protein OS=Arachis hypogaea OX=3818 GN=303L13_18 PE=4 SV=1				3.78744				Nucleus
A8VT41	19228.1	Conglutin OS=Arachis duranensis OX=130453 GN=ara d 2 PE=4 SV=1				3.1503				Cytoplasm
Q2KQ58	19279.9	Resistance protein PLTR (Fragment) OS=Arachis hypogaea OX=3818 PE=4 SV=1					3.45435			Nucleus
B4UWB8	19293.5	Putative Lil3 protein (Fragment) OS=Arachis hypogaea OX=3818 PE=2 SV=1						10.026		cytoplasm
K7PQ65	19307.4	Mother of FT and TFL1 OS=Arachis hypogaea OX=3818 GN=MFT PE=2 SV=1			3.0619					Chloroplast
A0A191UJ56;A0A2Z5HWN7	19354.7	Photosystem I assembly protein Ycf3 OS=Arachis hypogaea OX=3818 GN=ycf3 PE=3 SV=1							2.29861	Cytoplasm
Q2KPN4;Q2KPM2;Q2KPQ1;Q2KPK6;Q2KPK8;Q2KPL6;Q2KPN5;Q2KPS1;Q2KPN2	19482	Resistance protein PRG (Fragment) OS=Arachis hypogaea OX=3818 PE=4 SV=1						1.86861		Cell membrane
A0A1I9LV35	19607.1	Symbiotic remorin OS=Arachis hypogaea OX=3818 GN=SYMREM PE=2 SV=1		2.13115				3.51199		Cytoplasm
Q2KPP7;Q2KPM7	19634.3	Resistance protein PRG (Fragment) OS=Arachis hypogaea OX=3818 PE=4 SV=1			5.48236					Cytoplasm
B4UWB7	19693.7	Latex-abundant protein (Fragment) OS=Arachis hypogaea OX=3818 PE=2 SV=1				6.12689				Nucleus
N1NEU6	19739.4	Uncharacterized protein OS=Arachis duranensis OX=130453 GN=ARAX_ADH18B08-018 PE=4 SV=1			1.65731			1.51822	4.70099	Cytoplasm
Q2KPZ1;Q2KPY1	19752.5	Resistance protein PLTR (Fragment) OS=Arachis hypogaea OX=3818 PE=4 SV=1			7.33565			15.1585		Cytoplasm
Q2KQ03;Q2KQ27	19761.5	Resistance protein PLTR (Fragment) OS=Arachis hypogaea OX=3818 PE=4 SV=1		1.56796				11.1235		Nucleus
B4XID4;Q9SQH1	19794.7	Ara h 7 allergen OS=Arachis hypogaea OX=3818 PE=2 SV=1			5.00575			12.8243		Nucleus
K7PQ81	19822.3	Flowering locus T OS=Arachis hypogaea OX=3818 GN=FT PE=2 SV=1						5.3768		Nucleus
A0A290GK13	19827	Resistance protein (Fragment) OS=Arachis hypogaea OX=3818 PE=2 SV=1						6.10674		Cytoplasm
Q2KQ38;Q2KQ03	19854.9	Resistance protein PLTR (Fragment) OS=Arachis hypogaea OX=3818 PE=4 SV=1						6.11209		Cytoplasm
Q2KPL1	19865.6	Resistance protein PRG (Fragment) OS=Arachis hypogaea OX=3818 PE=4 SV=1					5.55665		25.6929	Cytoplasm
Q2KQ04	19895.8	Resistance protein PLTR (Fragment) OS=Arachis hypogaea OX=3818 PE=4 SV=1						2.06899		Nucleus.
B4UW73	19947.9	Universal stress protein OS=Arachis hypogaea OX=3818 PE=2 SV=1					8.55379			Cytoplasm
Q2KQ42;Q2KQ00;Q2KQ26;Q2KQ62;Q2KQ69	19970.1	Resistance protein PLTR (Fragment) OS=Arachis hypogaea OX=3818 PE=4 SV=1					70.2506			Cytoplasm
Q2KPY2	20081	Resistance protein PLTR (Fragment) OS=Arachis hypogaea OX=3818 PE=4 SV=1						2.32608		Cytoplasm
A0A0A6ZDP1	20101	Glyceraldehyde-3-phosphate dehydrogenase C2 OS=Arachis hypogaea OX=3818 PE=2 SV=1					2.72147			Cytoplasm
Q2KQ46	20114.3	Resistance protein PLTR (Fragment) OS=Arachis hypogaea OX=3818 PE=4 SV=1			4.54571					Nucleus
B4UWD4	20117.8	Putative mRNA export protein (Fragment) OS=Arachis hypogaea OX=3818 PE=2 SV=1						3.37296		Chloroplast
C0L2V5	20129.3	Uncharacterized protein OS=Arachis hypogaea OX=3818 PE=4 SV=1			1.56404					Nucleus
E2EAJ4	20158.3	Gigantea (Fragment) OS=Arachis diogoi OX=170720 PE=2 SV=1							53.9319	Cytoplasm
Q2KPZ5	20159.1	Resistance protein PLTR (Fragment) OS=Arachis hypogaea OX=3818 PE=4 SV=1			3.81614					Chloroplast
B4UW74	20179.2	Fructokinase (Fragment) OS=Arachis hypogaea OX=3818 PE=2 SV=1			1.67981					Nucleus.
K7PQV2	20180.8	Flowering locus T-like protein OS=Arachis hypogaea OX=3818 GN=FTL PE=2 SV=1			2.58167				4.0358	Chloroplast
Q850G4	20213.3	Putative early light induced protein (Fragment) OS=Arachis hypogaea OX=3818 GN=Gsi-39 PE=2 SV=1							3.9723	Cytoplasm
Q2KPY4	20342.2	Resistance protein PLTR (Fragment) OS=Arachis hypogaea OX=3818 PE=4 SV=1		4.39516		3.52825	6.83787			Cell wall
A0A290G034	20346.3	Resistance protein (Fragment) OS=Arachis hypogaea OX=3818 PE=2 SV=1	1.90675	1.83874			4.76158			Cell membrane
B4UWA3	20377.2	Uncharacterized protein OS=Arachis hypogaea OX=3818 PE=2 SV=1					8.22733			Cytoplasm
B4UW81;B4UW83	20399.8	Glutathione S-transferase 2 OS=Arachis hypogaea OX=3818 PE=2 SV=1						4.89677		Cytoplasm
A0A2D1CQI3;K7PQU7	20442.4	TFL1 OS=Arachis hypogaea OX=3818 GN=TFL1 PE=2 SV=1						6.78749		Cell wall
A0A290GEP8	20445.3	Resistance protein (Fragment) OS=Arachis hypogaea OX=3818 PE=2 SV=1		1.56818						Cell membrane
Q2KQ33;B2LR70;B2LR71;Q0PCD4	20459.6	Resistance protein PLTR (Fragment) OS=Arachis hypogaea OX=3818 PE=4 SV=1	2.21457			4.41146	3.55274			Nucleus
A0A290G009	20562.4	Resistance protein (Fragment) OS=Arachis hypogaea OX=3818 PE=2 SV=1			1.94515			5.51221		Nucleus
Q6PSU2;A5Z1Q9	20570.5	Conglutin-7 OS=Arachis hypogaea OX=3818 PE=1 SV=2						23.5657	42.1205	Cytoplasm
Q2KQ17;Q2KQ19;Q2KQ25	20631.2	Resistance protein PLTR (Fragment) OS=Arachis hypogaea OX=3818 PE=4 SV=1				3.71836				Chloroplast
T2BAU5	20664.7	Ribulose bisphosphate carboxylase small chain OS=Arachis hypogaea OX=3818 PE=2 SV=1						46.041		Nucleus
H6U598	20675.6	Phosphatases pleiotropic regulator PRL1 (Fragment) OS=Arachis hypogaea OX=3818 PE=2 SV=1					10.9035			Endoplasmic reticulum
G9HPX7;E3JPR7	20723.8	ADP-ribosylation factor OS=Arachis hypogaea OX=3818 GN=ARF PE=2 SV=1			1.71665					Cytoplasm
Q2KPK4	20805.3	Resistance protein PRG (Fragment) OS=Arachis hypogaea OX=3818 PE=4 SV=1			2.32933					Chloroplast
E3P863	20809.9	Putative arginine/serine-rich splicing factor OS=Arachis diogoi OX=170720 GN=DR-54 PE=2 SV=2		1.69123	4.37125					Chloroplast
E3P863	20809.9	Putative arginine/serine-rich splicing factor OS=Arachis diogoi OX=170720 GN=DR-54 PE=2 SV=2						2.54675		Chloroplast
C0L2V8;C0L2U8	20879	Putative ADP-ribosylation factor OS=Arachis hypogaea OX=3818 PE=3 SV=1		4.56989			5.02846			Endoplasmic reticulum
B4UW94	20911	Hyoscyamine 6 beta-hydroxylase (Fragment) OS=Arachis hypogaea OX=3818 PE=2 SV=1			2.39342		16.5975	2.89679		Cytoplasm
D8L209	20953.8	Putative receptor protein kinase (Fragment) OS=Arachis diogoi OX=170720 PE=2 SV=1						16.0178		Nucleus
A0A1L5JJJ5	21021.9	Late embryogenesis abundant protein 2 OS=Arachis ipaensis OX=130454 GN=LEA2 PE=2 SV=1							8.96509	Cytoplasm
E5FHY3	21032	Late embryogenesis abundant protein group 2 protein dehydrin OS=Arachis hypogaea OX=3818 GN=DHN1 PE=2 SV=1				2.28567	2.76501	3.16884		Cytoplasm
B4UW95	21063.2	Lactoylglutathione lyase OS=Arachis hypogaea OX=3818 PE=2 SV=1						2.03563		Cytoplasm
Q2HNZ7	21068.5	Resistance protein Cre (Fragment) OS=Arachis hypogaea OX=3818 GN=CRE PE=4 SV=1			2.46695					Cytoplasm
A0A061	21068.6	Lactoylglutathione lyase OS=Arachis hypogaea OX=3818 GN=GLYI PE=2 SV=2				1.79074	2.15773			Cytoplasm
N1NF34	21081.5	Putative C2 domain contatining protein OS=Arachis ipaensis OX=130454 GN=ARAX_AIPA147A20-007 PE=4 SV=1							4.96209	Cytoplasm
A0A290GJV6	21095.9	Resistance protein (Fragment) OS=Arachis hypogaea OX=3818 PE=2 SV=1		4.00533						Chloroplast
Q2KPK9	21134.2	Resistance protein PRG (Fragment) OS=Arachis hypogaea OX=3818 PE=4 SV=1			2.83103		2.88178			Cytoplasm
A0A191UJ69;A0A1C7D296	21153.1	ATP synthase subunit b_ chloroplastic OS=Arachis hypogaea OX=3818 GN=atpF PE=3 SV=1		1.6893	2.83483				7.17067	Chloroplast
P20780	21205.2	Arachin 21 kDa protein OS=Arachis hypogaea OX=3818 PE=1 SV=1				4.9598				Cell membrane
B4UW54	21223.4	GroES-like protein (Fragment) OS=Arachis hypogaea OX=3818 PE=2 SV=1							2.03455	Chloroplast
A0A191UJ77	21496.3	Photosystem I assembly protein Ycf4 OS=Arachis hypogaea OX=3818 GN=ycf4 PE=3 SV=1					8.1867			Chloroplast
Q2KPN2	21523.4	Resistance protein PRG (Fragment) OS=Arachis hypogaea OX=3818 PE=4 SV=1						2.52485		Cytoplasm
A0A0I9QPT2	21592.6	L18 ribosomal protein Heart Stopper OS=Arachis hypogaea OX=3818 GN=Heart Stopper PE=2 SV=1			1.78879	6.03545	2.245	5.42273		Chloroplast
A0A290GHZ4	21702.7	Resistance protein (Fragment) OS=Arachis hypogaea OX=3818 PE=2 SV=1	1.72185							Cell wall
A0A0D5Z9D0	21725.3	Germin-like protein 11 OS=Arachis hypogaea OX=3818 GN=GLP11 PE=2 SV=1					8.48431			Cell wall
E3NYG9	21992.7	Uncharacterized protein (Fragment) OS=Arachis diogoi OX=170720 PE=2 SV=1			1.59208					Nucleus
B4UWB2	22093.2	Kunitz trypsin inhibitor 4 OS=Arachis hypogaea OX=3818 PE=2 SV=1		1.63981						Vacuole
B4UWC3	22150.1	MADS box protein M8 (Fragment) OS=Arachis hypogaea OX=3818 PE=2 SV=1			2.08755					Nucleus
H6U5A9	22151.6	Mitochondrial GTPase (Fragment) OS=Aspergillus flavus OX=5059 PE=2 SV=1				2.47376				Chloroplast
B6VB01	22245.4	Auxin binding protein 1 OS=Arachis hypogaea OX=3818 GN=ABP1 PE=2 SV=1					5.0836	2.85124		Endoplasmic reticulum
P04149	22276.6	Arachin 25 kDa protein OS=Arachis hypogaea OX=3818 PE=1 SV=1					6.15818			Chloroplast
D4NXQ6	22298.6	Germin-like protein subfamily 3 member 2 OS=Arachis hypogaea OX=3818 GN=GLP7 PE=2 SV=1					7.79118			Exacellular region
N1NFT1	22344	Uncharacterized protein OS=Arachis duranensis OX=130453 GN=ARAX_ADH035P21-002 PE=4 SV=1			1.87136			2.602		Nucleus
M4SZY9	22346.8	Ethylene-responsive transcription factor OS=Arachis hypogaea OX=3818 GN=ERF PE=2 SV=1						11.3453		Nucleus
H6U5A4	22442.6	DSB repair complex subunit Ku70 (Fragment) OS=Aspergillus flavus OX=5059 PE=2 SV=1					7.32284	2.97091		Nucleus
N1NFY0	22480.9	Putative endonuclease/exonuclease/phosphatase OS=Arachis duranensis OX=130453 GN=ARAX_ADH079023-072J06-007 PE=4 SV=1			2.63029			12.675		Nucleus
V5T709	22490	Putative MYB-related protein 17 OS=Arachis hypogaea OX=3818 GN=MYB17 PE=4 SV=1					3.34356			Nucleus
E2DDA3	22558.9	Putative mitochondrial cytochrome P450 monooxygenase (Fragment) OS=Arachis diogoi OX=170720 PE=2 SV=1			5.02882					Endoplasmic
E5FHY7	22581.7	Late embryogenesis abundant protein group 3 protein OS=Arachis hypogaea OX=3818 GN=LEA3-5 PE=2 SV=1		1.60688	2.06273		2.3778	3.37504		Nucleus.
N1NKG4	22605.6	Uncharacterized protein OS=Arachis duranensis OX=130453 GN=ARAX_ADH179B13-001 PE=4 SV=1		3.54689			2.44095			Nucleus
B4UW60;E4W7V0	22619.6	DREB-like protein OS=Arachis hypogaea OX=3818 PE=2 SV=1		1.77007			10.3935			Nucleus
Q45W75	22788.4	Dirigent protein OS=Arachis hypogaea OX=3818 PE=2 SV=1			2.15124					Exacellular region
B4UWB4	23150.9	Lactoylglutathione lyase (Fragment) OS=Arachis hypogaea OX=3818 PE=2 SV=1			4.70073				3.95389	Cytoplasm
E4W7U9	23162.8	TINY transcription factor OS=Arachis hypogaea OX=3818 GN=TINY-binding domain PE=2 SV=1			4.76807					Nucleus
W8GH57	23163	Eukaryotic translation initiation factor OS=Arachis hypogaea OX=3818 GN=eIF(iso)4E PE=2 SV=1		3.61315	4.47442			3.27037		Cytoplasm
E3NYH0	23189.4	Asparagine synthetase (Fragment) OS=Arachis diogoi OX=170720 PE=2 SV=1		2.45706	6.60552					Chloroplast
N1NF39;N1NKK0	23255.8	Putative fatty acid elongase OS=Arachis duranensis OX=130453 GN=ARAX_ADH068E04-004 PE=4 SV=1		1.77809						Nucleus
A0A191UJ55	23336.2	30S ribosomal protein S4_ chloroplastic OS=Arachis hypogaea OX=3818 GN=rps4 PE=3 SV=1					11.1856	3.87161		Chloroplast
M1FT17	23398.2	Small GTP binding protein OS=Arachis hypogaea OX=3818 PE=4 SV=1			2.39838	3.46673		3.23367		Vacuole
G3LT02	23472.7	Chalcone-flavonone isomerase family protein OS=Arachis hypogaea OX=3818 GN=Chi PE=2 SV=1				5.19917	1.96523	2.56959		Chloroplast
E6Y9A5	23536.4	Beta-hydroxyacyl-ACP dehydratase OS=Arachis hypogaea OX=3818 GN=HD PE=2 SV=1				3.44215				Cytoplasm
D4NXQ0;A7LIS5	23562.2	Germin-like protein subfamily 3 member 3 OS=Arachis hypogaea OX=3818 GN=GLP1 PE=2 SV=1		1.85252						Cell wall
M4T0V2	23565.9	Uncharacterized protein (Fragment) OS=Arachis hypogaea OX=3818 PE=2 SV=1				2.69824				Nucleus
A0A290GK88	23577.3	Resistance protein (Fragment) OS=Arachis hypogaea OX=3818 PE=2 SV=1			11.2554					Cell wall
E2D2C7	23802.4	Thaumatin-like protein-like protein (Fragment) OS=Arachis diogoi OX=170720 PE=2 SV=1			4.32255					Cytoplasm
Q45W70	23962.7	Isomerase-like protein OS=Arachis hypogaea OX=3818 PE=2 SV=1					2.18283	1.91643	19.2584	Chloroplast
A0A0H3Y991	24023.2	Wuschel-related homeobox 13B1 OS=Arachis hypogaea OX=3818 GN=WOX13B2 PE=2 SV=1					1.54733			Nucleus
C0L2V3	24097.9	Putative phosphoglycerate dehydrogenase (Fragment) OS=Arachis hypogaea OX=3818 PE=4 SV=1						2.343	4.56643	Chloroplast
D4NXQ2	24136.7	Germin-like protein subfamily 1 member 1 OS=Arachis hypogaea OX=3818 GN=GLP3 PE=2 SV=1					148.727			Cell wall
A1DZF1	24141.7	Arachin 7 (Fragment) OS=Arachis hypogaea OX=3818 PE=2 SV=1			12.4207					Vacuole
Q1PCR5	24161.2	20S proteasome beta subunit (Fragment) OS=Arachis hypogaea OX=3818 PE=2 SV=1			5.82285		11.6223	2.3974	11.5073	Cytoplasm
A0A290G096	24169.5	Resistance protein (Fragment) OS=Arachis hypogaea OX=3818 PE=2 SV=1					64.3158			Nucleus
A0A0H3Y7V8	24249.5	Wuschel-related homeobox 13A OS=Arachis hypogaea OX=3818 GN=WOX13A PE=2 SV=1		1.853				2.23581		Nucleus
A0A0A6ZDR7	24325.2	Ribosomal protein L15 OS=Arachis hypogaea OX=3818 PE=2 SV=1			1.53576					Chloroplast
B4UW82	24344.3	Glutathione S-transferase 3 (Fragment) OS=Arachis hypogaea OX=3818 PE=2 SV=1					2.9184			Cytoplasm
A0A290G4T4	24386.1	Resistance protein (Fragment) OS=Arachis hypogaea OX=3818 PE=2 SV=1		1.89925				3.39859		Chloroplast
B4UW79	24413.8	Glutathione peroxidase (Fragment) OS=Arachis hypogaea OX=3818 PE=2 SV=1		2.20973					13.9434	Mitochondrion
N1NFX1	24415.9	Uncharacterized protein OS=Arachis duranensis OX=130453 GN=ARAX_ADH51I17-83F22-001 PE=4 SV=1					2.76886	4.51444	17.1263	Mitochondrion
B4UW57	24667.1	Putative dihydroflavonol reductase (Fragment) OS=Arachis hypogaea OX=3818 PE=2 SV=1			1.81346			4.99347		Chloroplast
Q6YDC8	24725.9	Resistance protein (Fragment) OS=Arachis cardenasii OX=51121 PE=4 SV=1						9.28603		Cytoplasm
A0A0B5HBM1;A0A0B5HFJ9	24769.4	Chalcone-flavonone isomerase family protein OS=Arachis hypogaea OX=3818 GN=CHI-II PE=2 SV=1		1.80106				4.87777		Chloroplast
E4W7V3	24795.6	Putative DREB transcription factor OS=Arachis hypogaea OX=3818 GN=DRE-binding domain PE=2 SV=1					2.3369	9.79382		Nucleus
A0A290GED5	24819.3	Resistance protein (Fragment) OS=Arachis hypogaea OX=3818 PE=2 SV=1					5.56187	5.54904		Nucleus
A0A0D5Z9C4	24834.4	Germin-like protein 10 OS=Arachis hypogaea OX=3818 GN=GLP10 PE=2 SV=1		1.87078			3.20361			Cell wall
A0A068VVA2	24854.4	Ca2+hinding-protein (Fragment) OS=Arachis hypogaea OX=3818 GN=AhSOS3 PE=4 SV=1					8.94404			Cell membrane
C7F8A3	24878.2	Glutathione S-transferase OS=Arachis hypogaea OX=3818 GN=GST PE=2 SV=1			2.27267					Cytoplasm
Q6KBB0;B4UWA9	24928.8	Putative inorganic pyrophosphatase OS=Arachis hypogaea OX=3818 GN=pah767 PE=2 SV=1						32.7825		Cytoplasm
A0A191UJB1	25001.4	30S ribosomal protein S3_ chloroplastic OS=Arachis hypogaea OX=3818 GN=rps3 PE=3 SV=1			2.01221					Chloroplast
A0A290G0B4	25002.2	Resistance protein (Fragment) OS=Arachis hypogaea OX=3818 PE=2 SV=1						8.50295		Nucleus
M4T2P8	25055.1	F-box family protein 6 (Fragment) OS=Arachis hypogaea OX=3818 PE=2 SV=1		1.65936			4.57438	3.15636		Chloroplast
N1NEV8	25064.1	Uncharacterized protein OS=Arachis duranensis OX=130453 GN=ARAX_ADH035P21-010 PE=4 SV=1			5.74211					Nucleus
B4UW62	25138.4	Embryo-abundant protein EMB (Fragment) OS=Arachis hypogaea OX=3818 PE=2 SV=1				2.9073				Chloroplast
Q06H26	25257.6	Tumor-related protein-like (Fragment) OS=Arachis hypogaea OX=3818 PE=2 SV=1	1.68513				2.6794			Nucleus
B4UW85	25340.4	Putative glycerate dehydrogenase (Fragment) OS=Arachis hypogaea OX=3818 PE=2 SV=1		1.77113						Mitochondrion
N1NFS0	25367.8	Putative FAD_binding domain containing protein OS=Arachis duranensis OX=130453 GN=ARAX_ADH18B08-019 PE=4 SV=1			4.59471				24.2783	Vacuole
A0A290GKH1	25449.2	Resistance protein (Fragment) OS=Arachis hypogaea OX=3818 PE=2 SV=1	4.0864					18.7556	2.26484	Cell wall
B4UWB5	25453.9	L-asparaginase (Fragment) OS=Arachis hypogaea OX=3818 PE=2 SV=1						5.42217		Mitochondrion
D6C529	25463.4	Leafy cotyledon 1-B OS=Arachis hypogaea OX=3818 GN=LEC1-B PE=2 SV=1		1.77105	5.89785			125.391		Nucleus
E2DQY7;E2EAZ8	25503.2	Granule-bound glycogen synthase (Fragment) OS=Arachis diogoi OX=170720 PE=2 SV=1			11.2392					Chloroplast
E3NYG3	25543.4	Cinnamic acid 4-hydroxylase (Fragment) OS=Arachis diogoi OX=170720 PE=2 SV=1	4.42237	1.68621			1.75312			Endoplasmic reticulum
Q6YDC9	25558.5	Resistance protein (Fragment) OS=Arachis cardenasii OX=51121 PE=4 SV=1		2.12812			3.92635			Cytoplasm
B4UWD1	25780.8	Putative metal ion-binding protein (Fragment) OS=Arachis hypogaea OX=3818 PE=2 SV=1		1.90307			21.4785			Nucleus
A0A0A6ZDS5;A0A0A6ZDY5	25806.4	Nucleoside diphosphate kinase OS=Arachis hypogaea OX=3818 PE=2 SV=1	1.8424				2.89073			Chloroplast
B4UW55	25873.1	CYP735A1 (Fragment) OS=Arachis hypogaea OX=3818 PE=2 SV=1					110.965		2.79815	Endoplasmic reticulum
G0Y6V3	25899.6	Uncharacterized protein OS=Arachis hypogaea OX=3818 GN=205D04_3 PE=4 SV=1		2.03918						Nucleus
A0A1C7D2M9	25910.5	NAD(P)H-quinone oxidoreductase subunit K_ chloroplastic OS=Arachis hypogaea OX=3818 GN=ndhK PE=3 SV=1					99.0931	1.72134	3.37412	Chloroplast
Q5PXR2	25912.6	Resistance protein-like protein (Fragment) OS=Arachis cardenasii OX=51121 PE=4 SV=1					6.08971	3.31772	7.23589	Cytoplasm
A0A191UJ91;A0A1C7D2T5	25916.5	Cytochrome b6 OS=Arachis hypogaea OX=3818 GN=petB PE=3 SV=1					9.71436			Chloroplast
B4UW91	25919	Putative heat shock protein 4 (Fragment) OS=Arachis hypogaea OX=3818 PE=2 SV=1		1.53424	11.6697	3.20731		3.31414	4.4491	Chloroplast
N1NKG9;E5FHZ1	26097.9	Seed maturation protein OS=Arachis hypogaea OX=3818 GN=ARAX_AHF417E07-003 PE=4 SV=1		2.02422						Nucleus
Q43375	26156.2	Galactose-binding lectin (Fragment) OS=Arachis hypogaea OX=3818 GN=lec PE=2 SV=2			19.9511		5.44675			Cytoplasm
A0A290GJR7	26305.2	Resistance protein (Fragment) OS=Arachis hypogaea OX=3818 PE=2 SV=1		1.93227				10.3823		Cell wall
K0P2S0	26309	Eukaryotic translation initiation factor 4E OS=Arachis hypogaea OX=3818 GN=eIF4E PE=2 SV=1	2.54688	1.68925			3.94194			Cytoplasm
B4UW69	26565.6	Far-red impaired response protein (Fragment) OS=Arachis hypogaea OX=3818 PE=2 SV=1		1.8168						Nucleus
B4UW49;H9LBH7	26613.6	Putative lipase (Fragment) OS=Arachis hypogaea OX=3818 PE=2 SV=1			2.18695					Chloroplast
B4UWC8	26674.9	Mannose/glucose-binding lectin (Fragment) OS=Arachis hypogaea OX=3818 PE=2 SV=1		2.29234	5.50743					Cytoplasm
B4UWB9	26794.5	Lipoxygenase 1 (Fragment) OS=Arachis hypogaea OX=3818 PE=2 SV=1				1.67385	2.45798			Cytoplasm
A0A290GKC3	26846.7	Resistance protein (Fragment) OS=Arachis hypogaea OX=3818 PE=2 SV=1						8.66844		Cell membrane
Q84TU2	26973.6	Subtilisin-like seed-specific protein (Fragment) OS=Arachis hypogaea OX=3818 PE=2 SV=1					15.235	2.82575		Cell membrane
Q5I212	27064.6	Putative root-knot resistance protein OS=Arachis hypogaea OX=3818 PE=2 SV=1			4.52721			17.8461		Nucleus.
B4UW53	27128.5	Integrase (Fragment) OS=Arachis hypogaea OX=3818 PE=2 SV=1			2.02075		4.92134			Chloroplast
A0A191UJ73	27154.4	30S ribosomal protein S2_ chloroplastic OS=Arachis hypogaea OX=3818 GN=rps2 PE=3 SV=1				3.51101	8.76749	6.30944		Chloroplast
A0A191UJ83	27155.8	envelope membrane protein_ chloroplastic OS=Arachis hypogaea OX=3818 GN=cemA PE=3 SV=1			17.044					Chloroplast
V5T6N4	27204.8	Putative R2R3 MYB protein 1 OS=Arachis hypogaea OX=3818 GN=MYB1 PE=4 SV=1					58.9603			Nucleus
A0A290G0C0	27273.1	Resistance protein (Fragment) OS=Arachis hypogaea OX=3818 PE=2 SV=1			2.6872					Nucleus
A0A0U3E0B1	27412.5	Phosphatidyl inositol phosphate kinase OS=Arachis hypogaea OX=3818 GN=PIPK1 PE=2 SV=1						4.91752		Chloroplast
Q6YDD6	27420.3	Resistance protein (Fragment) OS=Arachis cardenasii OX=51121 PE=4 SV=1					6.90169		6.06367	Cytoplasm
I3XP93	27430.3	Ribulose-1_5-bisphosphate carboxylase/oxygenase large subunit (Fragment) OS=uncultured bacterium OX=77133 GN=cbbL PE=4 SV=1		2.28011	8.52881					Chloroplast
B4UW64	27455.4	Epoxide hydrolase (Fragment) OS=Arachis hypogaea OX=3818 PE=2 SV=1							2.2986	Chloroplast
C0L2U0	27571.6	Putative cyclase family protein OS=Arachis hypogaea OX=3818 PE=4 SV=1		2.14253	3.13981		5.08618			Exacellular region
J9QGM3	27683.4	Chalcone-flavonone isomerase family protein OS=Arachis hypogaea OX=3818 GN=CHI-I PE=2 SV=1	2.84444				3.67548			Chloroplast
B4UWD6	27691.9	Myosin XI (Fragment) OS=Arachis hypogaea OX=3818 PE=2 SV=1		1.62602	2.18195		10.6899	22.2743		Chloroplast
V5T7W3	27807.3	Putative R2R3 MYB protein 3 OS=Arachis hypogaea OX=3818 GN=MYB3 PE=4 SV=1		1.62978	2.60216			15.0568		Nucleus
A0A290GEM8	27918	Resistance protein (Fragment) OS=Arachis hypogaea OX=3818 PE=2 SV=1			2.47442		1.71537			Nucleus
Q09GR6	27950.8	MADS-box transcription factor OS=Arachis hypogaea OX=3818 PE=2 SV=1					317.491			Nucleus
A0A290G0G6	27970.5	Resistance protein (Fragment) OS=Arachis hypogaea OX=3818 PE=2 SV=1		1.6511						Cell wall
E3NYG8	28017.2	Zinc finger protein OS=Arachis diogoi OX=170720 PE=2 SV=1			3.50769					Nucleus
A0A290GIB2	28106	Resistance protein (Fragment) OS=Arachis hypogaea OX=3818 PE=2 SV=1	2.05234				3.00701	3.80358		Cell wall
H6U599	28297.2	Receptor serine/threonine kinase (Fragment) OS=Arachis hypogaea OX=3818 PE=2 SV=1		1.96492			21.3775			Nucleus
I3XPB4	28342.3	Ribulose-1_5-bisphosphate carboxylase/oxygenase large subunit (Fragment) OS=uncultured bacterium OX=77133 GN=cbbL PE=4 SV=1	2.26035		1.85055	2.40791				Chloroplast
A0A290G0J7	28371.7	Resistance protein (Fragment) OS=Arachis hypogaea OX=3818 PE=2 SV=1			2.66977			21.8538	7.61432	Cell wall
Q43377;Q5UIP9;Q5UIQ0	28389.3	Mannose/glucose-binding lectin (Fragment) OS=Arachis hypogaea OX=3818 GN=lec PE=2 SV=1						3.37415		Vacuole
E9LFE8	28404.3	11S arachin (Fragment) OS=Arachis hypogaea OX=3818 PE=2 SV=1		1.72254			5.13693	3.8258	27.1544	Vacuole
I3XPC2	28687.7	Ribulose-1_5-bisphosphate carboxylase/oxygenase large subunit (Fragment) OS=uncultured bacterium OX=77133 GN=cbbL PE=4 SV=1			2.37727		2.2868			Chloroplast
V5T6P8	28826.7	Putative MYB-related protein 18 OS=Arachis hypogaea OX=3818 GN=MYB18 PE=4 SV=1	1.84636	2.49082	1.71476			19.3386	10.2709	Nucleus
E6Y6R3;E6Y6R1;E6Y6Q9;E6Y6R0;E6Y6R2	29030.3	Biotin carboxyl carrier protein of acetyl-CoA carboxylase OS=Arachis hypogaea OX=3818 GN=BCCP2-5 PE=2 SV=1		1.94569			4.86191			Chloroplast
I3XPB5	29060.2	Ribulose-1_5-bisphosphate carboxylase/oxygenase large subunit (Fragment) OS=uncultured bacterium OX=77133 GN=cbbL PE=4 SV=1			2.29434			1.81633	148.705	Chloroplast
Q06H27	29115	Tryptophan synthase alpha chain (Fragment) OS=Arachis hypogaea OX=3818 PE=2 SV=1						33.3201	1.68023	Chloroplast
P02872	29382.1	Galactose-binding lectin OS=Arachis hypogaea OX=3818 PE=1 SV=3						32.5543		Cytoplasm
Q42515	29437.6	Chitinase (Class II) OS=Arachis hypogaea OX=3818 GN=chi2;2 PE=2 SV=1		2.5188	1.7675		3.43803			Vacuole
A0A089ZXL7	29464.2	Peanut agglutinin variant OS=Arachis hypogaea OX=3818 PE=2 SV=1						2.44073		Cytoplasm
E6Y6Q7;E6Y6Q8	29520.8	Biotin carboxyl carrier protein of acetyl-CoA carboxylase OS=Arachis hypogaea OX=3818 GN=BCCP1-1 PE=2 SV=1						1.60802		Chloroplast
Q43373	29623.3	Galactose-binding lectin OS=Arachis hypogaea OX=3818 GN=lec PE=2 SV=1		2.00574						Cytoplasm
I3XPA7	29641	Ribulose-1_5-bisphosphate carboxylase/oxygenase large subunit (Fragment) OS=uncultured bacterium OX=77133 GN=cbbL PE=4 SV=1		1.69288	1.75382					Chloroplast
A0A290GK29	29875.4	Resistance protein (Fragment) OS=Arachis hypogaea OX=3818 PE=2 SV=1					27.8762	3.10054	3.53489	Cell wall
A0A191UJA7;A0A191UJD3;A0A1C7D2T7	29958.5	50S ribosomal protein L2_ chloroplastic OS=Arachis hypogaea OX=3818 GN=rpl2 PE=3 SV=1						3.24068		Chloroplast
A0A290G0F8	30021.4	Resistance protein (Fragment) OS=Arachis hypogaea OX=3818 PE=2 SV=1					21.5504			Cell membrane
B5AK52	30030.8	NAC-like transcription factor OS=Arachis hypogaea OX=3818 GN=NAC2 PE=2 SV=1			5.55901	4.30448		10.276		Nucleus
I3XPC4	30060.2	Ribulose-1_5-bisphosphate carboxylase/oxygenase large subunit (Fragment) OS=uncultured bacterium OX=77133 GN=cbbL PE=4 SV=1		2.06858						Chloroplast
C0L2U3	30131.7	Putative cyclase family protein OS=Arachis hypogaea OX=3818 PE=4 SV=1			2.79495					Exacellular region
I3XPB6	30177.3	Ribulose-1_5-bisphosphate carboxylase/oxygenase large subunit (Fragment) OS=uncultured bacterium OX=77133 GN=cbbL PE=4 SV=1			2.09542	2.61574	2.37326	7.33368	20.4114	Chloroplast
N1NKJ2	30393	Mediator of RNA polymerase II transcription subunit 31 OS=Arachis ipaensis OX=130454 GN=ARAX_AIPA147A20-017 PE=3 SV=1			4.58516		1.8102	5.44037	7.40241	Nucleus
I3XP94	30428.5	Ribulose-1_5-bisphosphate carboxylase/oxygenase large subunit (Fragment) OS=uncultured bacterium OX=77133 GN=cbbL PE=4 SV=1	4.20692		4.06119	8.31534		19.4323		Chloroplast
M4TG02;M4T2N8	30479.3	Auxin signaling F-box 3 (Fragment) OS=Arachis hypogaea OX=3818 GN=AFB3 PE=2 SV=1			2.7177		3.0713	19.867		Nucleus
A0A0K0KBG7	30612	Chalcone-flavonone isomerase family protein OS=Arachis hypogaea OX=3818 GN=CHI2 PE=2 SV=1					4.64507			Cell membrane
Q70DJ5;A0A1K4	30765.3	Alpha-methyl-mannoside-specific lectin OS=Arachis hypogaea OX=3818 PE=1 SV=1			2.51937			25.1955		Cytoplasm
A0A290G047	30819.9	Resistance protein (Fragment) OS=Arachis hypogaea OX=3818 PE=2 SV=1	1.513	1.55381						Nucleus
Q43322;D8V5S2	30966.6	Chitinase (Class II) OS=Arachis hypogaea OX=3818 GN=chi2;1 PE=4 SV=1						6.68009		Vacuole
A0A290GJY7	30992.1	Resistance protein (Fragment) OS=Arachis hypogaea OX=3818 PE=2 SV=1						5.70124		Cell wall
A0A217FAR5	31020.8	Prephenate dehydrogenase OS=Arachis hypogaea OX=3818 GN=PDH PE=2 SV=1				2.96463		4.23225		Chloroplast
T2BAV2	31031.8	Ribosome recycling factor OS=Arachis hypogaea OX=3818 GN=RRF PE=2 SV=1						3.90775		Chloroplast
A0A290G0G8	31067.5	Resistance protein (Fragment) OS=Arachis hypogaea OX=3818 PE=2 SV=1			1.75287		16.195	8.64716	15.288	Cell wall
E5FHZ8	31132.6	Late embryogenesis abundant protein group 9 protein OS=Arachis hypogaea OX=3818 GN=LEA9-2 PE=2 SV=1		1.63042	3.0188				5.22647	Cell wall
A1E2B1	31495.8	11S seed storage globulin B2 OS=Arachis hypogaea OX=3818 PE=2 SV=1			3.1892	7.67711	27.5282		22.4575	Vacuole
C0L2U1	31554.2	Putative cyclase family protein OS=Arachis hypogaea OX=3818 PE=4 SV=1							10.7883	Exacellular region
A0A290GK97	31619.2	Resistance protein (Fragment) OS=Arachis hypogaea OX=3818 PE=2 SV=1	2.16323	1.69658	4.6593		2.43792	5.09673	3.05793	Cell wall
A0A1L5JJI4	32416.5	Late embryogenesis abundant protein 3 OS=Arachis hypogaea OX=3818 GN=LEA3 PE=2 SV=1		2.92888	1.65532			2.38882		Cell wall
V5T692	32434.8	Putative MYB-related protein 21 OS=Arachis hypogaea OX=3818 GN=MYB21 PE=3 SV=1		1.50842	5.58535			2.08125		Nucleus
V5T8J4	32744.4	Putative MYB-related protein 29 OS=Arachis hypogaea OX=3818 GN=MYB29 PE=4 SV=1			1.83397	2.05353		4.0909		Nucleus
A0A1L1VTR5;Q06H33;V5T6N9	32835.5	MYB-like transcript factor 6 OS=Arachis hypogaea OX=3818 GN=MYBL6 PE=2 SV=1					4.35018	1.79711		Nucleus
N1NJG9	32941.1	Putative D-arabinono-1_4-lactone oxidase OS=Arachis duranensis OX=130453 GN=ARAX_ADH18B08-001 PE=4 SV=1			4.73905					Chloroplast
V5T7W9	33006.7	Putative MYB-related protein 14 OS=Arachis hypogaea OX=3818 GN=MYB14 PE=4 SV=1			7.39079					Nucleus
A0A0U3DHM7	33026.2	Inositol polyphosphate multikinase (Fragment) OS=Arachis hypogaea OX=3818 GN=IPK2 PE=2 SV=1						1.80763		Chloroplast
A0A290GKA2	33036.7	Resistance protein (Fragment) OS=Arachis hypogaea OX=3818 PE=2 SV=1					2.17852	1.85407		Nucleus
V5T6Q3	33135	Putative MYB-related protein 23 OS=Arachis hypogaea OX=3818 GN=MYB23 PE=3 SV=1			2.78287			3.25133		Nucleus
H9L792	33476	CDP-diacylglycerol-glycerol-3-phosphate 3-phosphatidyltransferase OS=Arachis hypogaea OX=3818 GN=PGP1 PE=2 SV=1		4.01114	3.03606		3.15945			Chloroplast
A0A290G5F3	33496.5	Resistance protein (Fragment) OS=Arachis hypogaea OX=3818 PE=2 SV=1						4.34268	4.6897	Nucleus
N1NF20	33507.4	Putative cellulose synthase OS=Arachis ipaensis OX=130454 GN=ARAX_AIPA147A20-013 PE=4 SV=1					1.72884			Nucleus
V5T688	33559.4	Putative MYB-related protein 16 OS=Arachis hypogaea OX=3818 GN=MYB16 PE=4 SV=1		1.90838						Nucleus
A0A290FZX0;A0A290GK04	33578.4	Resistance protein (Fragment) OS=Arachis hypogaea OX=3818 PE=2 SV=1		1.66875					7.11282	Nucleus
Q6PSU5	33661.4	Conarachin (Fragment) OS=Arachis hypogaea OX=3818 PE=2 SV=1			4.56452	2.71746				Vacuole
A0A290G0E3	33722.3	Resistance protein (Fragment) OS=Arachis hypogaea OX=3818 PE=2 SV=1	1.69739	1.72609	2.61997	3.27294	8.26402			Cell wall
J9Q9Z8	33739.1	Ethylene-responsive element binding factor 3 OS=Arachis hypogaea OX=3818 GN=ERF3 PE=2 SV=1					6.45882			Nucleus
H6U5A8	33751.5	HATPase_c domain protein (Fragment) OS=Aspergillus flavus OX=5059 PE=2 SV=1					1.96629	2.27905		Nucleus
A0A023IUN1	33820.7	Abscisic acid 8-hydroxylase 3 (Fragment) OS=Arachis hypogaea OX=3818 GN=CYP707A PE=2 SV=1	2.73719				19.0671			Endoplasmic reticulum
A0A0K0KBG9	33842.3	Squamosa promoter-binding-like protein OS=Arachis hypogaea OX=3818 GN=SPL8 PE=2 SV=1		1.63897	5.52702					Nucleus
A0A1Z2RPA4	33871.7	Translation elongation factor 1-alpha (Fragment) OS=Cochliobolus miyabeanus OX=101162 GN=EF1a PE=4 SV=1			4.14853		3.72121		23.7667	Cytoplasm
G0Y6W7	33902	Conarachin OS=Arachis hypogaea OX=3818 GN=205D04_17 PE=4 SV=1					2.79556			Chloroplast
A0A290G0B3	34091.5	Resistance protein (Fragment) OS=Arachis hypogaea OX=3818 PE=2 SV=1			2.9713	1.85673	83.866			Cell wall
V5T8I9	34189.6	Putative MYB-related protein 19 OS=Arachis hypogaea OX=3818 GN=MYB19 PE=4 SV=1						1.57738	22.5791	Nucleus
A0A290GKG3	34268.9	Resistance protein (Fragment) OS=Arachis hypogaea OX=3818 PE=2 SV=1						3.11109		Nucleus
A0A3G1VVS8	34286.5	Superoxide dismutase copper chaperone OS=Arachis hypogaea OX=3818 PE=2 SV=1		2.18022		3.40545	6.16267	1.72887		Chloroplast
A0A290G4W5	34316.2	Resistance protein (Fragment) OS=Arachis hypogaea OX=3818 PE=2 SV=1						2.23246	7.01858	Nucleus
B2ZHY3	34344.6	NAC-like transcription factor OS=Arachis hypogaea OX=3818 PE=2 SV=1		1.83319	1.67986		6.46285	15.7292	44.0898	Nucleus
V5T6Q5	34360.1	Putative MYB-related protein 28 OS=Arachis hypogaea OX=3818 GN=MYB28 PE=4 SV=1					3.00409	10.0631		Nucleus
K0FBW3	34414.7	Ethylene-responsive element binding factor 4 OS=Arachis hypogaea OX=3818 GN=ERF4 PE=2 SV=1			5.03727			2.84848	11.089	Nucleus
V5T679	34737.3	Putative R2R3 MYB protein 4 OS=Arachis hypogaea OX=3818 GN=MYB4 PE=4 SV=1						3.39754	4.78209	Nucleus
G0Y6U5	34763	Uncharacterized protein OS=Arachis hypogaea OX=3818 GN=303L13_15 PE=4 SV=1			2.92156					Nucleus
A0A1L1XUG9	34791.6	Phytol kinase 2 OS=Arachis hypogaea OX=3818 PE=2 SV=1					3.14942			Chloroplast
V5T718	35071.5	Putative MYB-related protein 27 OS=Arachis hypogaea OX=3818 GN=MYB27 PE=4 SV=1					5.92474			Nucleus
N1NF28	35278.9	Putative oligosaccharide biosynthesis protein OS=Arachis ipaensis OX=130454 GN=ARAX_AIPA147A20-002 PE=4 SV=1		1.6462	5.06281			2.00965		Endoplasmic reticulum
A0A0F7GQF6	35451.6	Aminocyclopropanecarboxylate oxidase OS=Arachis hypogaea OX=3818 GN=ACO1 PE=2 SV=1					1.78349		8.42783	Cytoplasm
V5T8I2	35727.5	Putative R2R3 MYB protein 7 OS=Arachis hypogaea OX=3818 GN=MYB7 PE=4 SV=1			4.81528		1.94088	3.89372	11.1377	Nucleus
A0A0A1ESG0;A0A0A1EXN0	35969.4	Actin (Fragment) OS=Arachis hypogaea OX=3818 PE=3 SV=1			2.13499			14.165	16.4153	Cytoskeleton
P22196	36069.7	Cationic peroxidase 2 OS=Arachis hypogaea OX=3818 GN=PNC2 PE=2 SV=1			2.32843			10.5496		Exacellular region
D3JWB7	36168.9	CCT domain protein (Fragment) OS=Arachis hypogaea OX=3818 GN=CCT PE=2 SV=2			8.67189					Nucleus
A0A0F7CUC1	36179.2	Annexin OS=Arachis hypogaea OX=3818 GN=AnnAh2 PE=2 SV=1					9.32694		31.4906	Cytoplasm
D8V5S2;Q43322	36192.7	Class II chitinase OS=Arachis hypogaea OX=3818 GN=chi2.1 PE=2 SV=1							6.11598	Vacuole
A0A290GKG7	36202.9	Resistance protein (Fragment) OS=Arachis hypogaea OX=3818 PE=2 SV=1		1.54021				9.86973		Cytoplasm
A0A0F6VX63;B4UW70	36251.3	Annexin OS=Arachis hypogaea OX=3818 PE=2 SV=1			6.26269		2.12112			Cytoplasm
H9LBH7	36330.4	Monoacylglycerol acyltransferase OS=Arachis hypogaea OX=3818 GN=MGAT PE=2 SV=1		2.95333					3.70793	na
A0A345GPQ3	36490.4	Peroxisomal fatty acid beta-oxidation multifunctional protein 1 (Fragment) OS=Arachis hypogaea OX=3818 GN=MFP1 PE=2 SV=1						1.54748		Peroxisome
A0A290GID4	36495.7	Mitogen-activated protein kinase (Fragment) OS=Arachis hypogaea OX=3818 PE=2 SV=1						2.06806		Nucleus
M4TFZ7	36541.9	Proteasome-associated protein ECM29 (Fragment) OS=Arachis hypogaea OX=3818 GN=ECM29 PE=2 SV=1					6.82471			Cytoplasm
A0A0F7GFE1	36576.4	Annexin OS=Arachis hypogaea OX=3818 GN=AnnAh7 PE=2 SV=1			2.14036		2.09724		7.2828	Cytoplasm
N1NJF9	36864.1	Putative Cation_efflux domain containing protein OS=Arachis duranensis OX=130453 GN=ARAX_ADH18B08-020 PE=4 SV=1			9.90952		5.40054	7.30976		Vacuole
A0A0K0KBH3	36989.9	Squamosa promoter-binding-like protein OS=Arachis hypogaea OX=3818 GN=SPL9 PE=2 SV=1			5.32174		2.08763	1.57011		Nucleus
A0A345GPQ2	37290.4	Long-chain fatty alcohol oxidase 2 (Fragment) OS=Arachis hypogaea OX=3818 GN=FAO2 PE=2 SV=1					6.77325		21.1369	Mitochondrion
V5T705	37346.1	Putative 3R MYB protein 10 OS=Arachis hypogaea OX=3818 GN=MYB10 PE=4 SV=1			1.71946			2.71268		Nucleus
V5T7X2	37511.2	Putative MYB-related protein 20 OS=Arachis hypogaea OX=3818 GN=MYB20 PE=4 SV=1		2.99861	2.97467					Nucleus
A0A088BAX2	37595.5	Diacylglycerol acyltransferase OS=Arachis hypogaea OX=3818 GN=DGAT PE=2 SV=1		1.56844	5.41605			12.7957		Nucleus
N1NEV6	37673.6	Uncharacterized protein OS=Arachis duranensis OX=130453 GN=ARAX_ADH25F09-008 PE=4 SV=1					1.73357	3.11331		Nucleus
G3GD61;G3GD57;G3GD60;G3GD63;G3GD58;G3GD59;G3GD62;G3GD64	37786.4	Diacylglycerol acyltransferase type 2 OS=Arachis glabrata OX=212810 GN=DGAT2e PE=2 SV=1					8.60535			Endoplasmic reticulum
D5LG62	37845.5	HSR203J protein OS=Arachis hypogaea OX=3818 GN=hsr203J PE=4 SV=1		1.90847	73.0526	3.01673				Nucleus
A0A0K0KCL4	38007	Squamosa promoter-binding-like protein OS=Arachis hypogaea OX=3818 GN=SPL2 PE=2 SV=1						3.38774		Nucleus
V5T7Y1	38121.1	Putative MYB-related protein 30 OS=Arachis hypogaea OX=3818 GN=MYB30 PE=4 SV=1							154.566	Nucleus
G0Y6T5	38155.2	Uncharacterized protein OS=Arachis hypogaea OX=3818 GN=303L13_5 PE=4 SV=1						2.24236		Nucleus
A0A191UJA3	38248.2	DNA-directed RNA polymerase subunit alpha OS=Arachis hypogaea OX=3818 GN=rpoA PE=3 SV=1					3.71596			Chloroplast
A0A290GK03	38297.6	Resistance protein (Fragment) OS=Arachis hypogaea OX=3818 PE=2 SV=1				8.19635				Nucleus
Q2KP14	38491.7	Soluble diacylglycerol acyltransferase OS=Arachis hypogaea OX=3818 GN=DGAT3 PE=2 SV=1		2.11179	3.69952					Nucleus
N1NKL1	38538.5	Putative HpcH/HpaI aldolase/citrate lyase OS=Arachis duranensis OX=130453 GN=ARAX_ADH068E04-007 PE=4 SV=1						2.85858		Chloroplast
T2B9M0	38610.7	Fructose-bisphosphate aldolase OS=Arachis hypogaea OX=3818 PE=2 SV=1					3.78222			Cytoplasm
A0A290GK11	38944.5	Resistance protein (Fragment) OS=Arachis hypogaea OX=3818 PE=2 SV=1		1.88167	4.28925	1.64037				Chloroplast
A0A384R632	38957	Sphingolipid delta(4)-desaturase DES1-like OS=Arachis hypogaea OX=3818 GN=DES1 PE=2 SV=1			3.18691					Endoplasmic reticulum
M4IXA7	38977.6	Beta-1_3-glucanase OS=Arachis hypogaea OX=3818 PE=2 SV=1		1.59142		4.82256		3.13705		Exacellular matrix
G9I5H8	39385.2	DFR OS=Arachis hypogaea OX=3818 PE=2 SV=1					1.92313		11.1129	Cytoplasm
A0A0A7DZG5	39427.7	GID1 OS=Arachis hypogaea OX=3818 PE=2 SV=1					4.02298			Nucleus
A0A2I7NA03	39430.4	Gamma-TMT2 OS=Arachis hypogaea OX=3818 PE=3 SV=1					6.16881			Chloroplast
A0A290G0A5;A0A290GE61	39445.7	Resistance protein (Fragment) OS=Arachis hypogaea OX=3818 PE=2 SV=1					4.93489	9.83812		Chloroplast
A0A0K0KBH4	39522.9	Squamosa promoter-binding-like protein OS=Arachis hypogaea OX=3818 GN=SPL16 PE=2 SV=1			3.60999		4.82729		432.986	Nucleus
B5AK53	39670.5	WRKY transcription factor OS=Arachis hypogaea OX=3818 PE=2 SV=1		2.10301						Nucleus
A0A126DK54	39752.2	DnaJ OS=Arachis diogoi OX=170720 PE=2 SV=1			2.37826	4.60405		3.39255		Golgi apparatus
A0A0A7E0N9	39792.1	Uncharacterized protein OS=Arachis hypogaea OX=3818 PE=2 SV=1			10.2995	1.85092		7.38504		Nucleus
A7LB59	39882.8	Steroleosin-B OS=Arachis hypogaea OX=3818 GN=STO-B PE=2 SV=1	2.50751					3.90323		Chloroplast
D7RJM3	39889.9	S-adenosylmethionine decarboxylase proenzyme OS=Arachis hypogaea OX=3818 GN=SAMDC PE=2 SV=1						4.30412		Cell membrane
E3P862;E3NYT0	39913.7	Cysteine protease OS=Arachis diogoi OX=170720 PE=2 SV=2		1.90881			2.0379			Vacuole
A0A0K0KBG3	40173	Anthocyanidin synthase OS=Arachis hypogaea OX=3818 GN=ANS PE=2 SV=1	1.94067					9.84112	4.75292	Cytoplasm
A0A0K0KBG1	40240.6	Dihydroflavonol-4-reductase OS=Arachis hypogaea OX=3818 GN=DFR PE=2 SV=1					5.07504			Golgi apparatus
A0A191UJC1	40292.1	NAD(P)H-quinone oxidoreductase subunit 1_ chloroplastic OS=Arachis hypogaea OX=3818 GN=ndhA PE=3 SV=1			5.94114		3.17492		27.9126	Plasma membrane
V5T701	40425.7	Putative R2R3 MYB protein 5 OS=Arachis hypogaea OX=3818 GN=MYB5 PE=4 SV=1			1.53914					Nucleus
A0A023IUL9	40669.2	Abscisic acid 8-hydroxylase 2 (Fragment) OS=Arachis hypogaea OX=3818 GN=CYP707A PE=2 SV=1						5.64964	18.468	Endoplasmic reticulum
E7CQA1	40699.3	Heat shock transcription factor A-2 OS=Arachis hypogaea subsp. hypogaea OX=226205 GN=HsfA2 PE=2 SV=1			1.72626			30.295		Nucleus.
D8KXY5;D8KXY6;D8KXY7	41107.1	Malonyl-CoA:ACP transacylase 1-1 OS=Arachis hypogaea OX=3818 GN=MCAT1-1 PE=2 SV=1					3.36923			Chloroplast
V5T8J3	41143.9	Putative MYB-related protein 24 OS=Arachis hypogaea OX=3818 GN=MYB24 PE=4 SV=1	1.51212				1.64092		47.3174	Nucleus
Q0PWM5	41170	Mannitol-1-phosphate 5-dehydrogenase OS=Escherichia coli (strain K12 / W3110 / ATCC 27325 / DSM 5911) OX=316407 GN=mtlD PE=3 SV=1					6.8623			Chloroplast
A0A290G0B2	41278	Resistance protein (Fragment) OS=Arachis hypogaea OX=3818 PE=2 SV=1						5.47901		Chloroplast
A0A0K0KCL2	41494.2	Flavanone-3-hydroxylase OS=Arachis hypogaea OX=3818 GN=F3H PE=2 SV=1		2.45392		3.03187	3.17538			Cytoplasm
K0FAV2	41496	Ethylene-responsive element binding factor 1 OS=Arachis hypogaea OX=3818 GN=ERF1 PE=2 SV=1		2.31471	2.70457	2.51691	11.2384			Nucleus
D8KXZ7;D8KXZ6	41532.5	Enoyl-ACP reductase 1-2 OS=Arachis hypogaea OX=3818 GN=ENR1-2 PE=2 SV=1		1.99978	6.4068					Chloroplast
A0A290GI95	41699.2	Resistance protein (Fragment) OS=Arachis hypogaea OX=3818 PE=2 SV=1		2.40536	2.3876			7.6983		Nucleus
A0A0R4UZT6	41774.8	Acetoacetyl-coenzyme A thiolase OS=Arachis hypogaea OX=3818 GN=ACAT PE=2 SV=1					5.33884	41.0026		Peroxisome
N1NFV1	42021.1	PfkB family kinase OS=Arachis duranensis OX=130453 GN=ARAX_ADH079023-072J06-004 PE=4 SV=1			3.34506	1.88992	12.2868	26.6385		Chloroplast
C0L2U4	42398.5	Putative disease resistance protein OS=Arachis hypogaea OX=3818 PE=4 SV=1					1.59168		36.52	Cell wall.
D9IA33	42634.9	Resveratrol synthase (Fragment) OS=Arachis hypogaea OX=3818 PE=3 SV=1			23.8377					Cytoplasm
A0A345GPQ1	42740.3	Long-chain fatty alcohol oxidase 1 (Fragment) OS=Arachis hypogaea OX=3818 GN=FAO1 PE=2 SV=1						4.19546		Vacuole
A9YED0	42901.2	Mitogen-activated protein kinase OS=Arachis hypogaea OX=3818 PE=2 SV=2						7.09053		Nucleus
P20178	43132.6	Stilbene synthase 1 OS=Arachis hypogaea OX=3818 PE=2 SV=1			8.63556		4.62636			Cytoplasm and Cytosol
A0A0U1XHN2	43197	Fructose-bisphosphate aldolase OS=Arachis hypogaea OX=3818 GN=FBP1 PE=2 SV=1		1.94465						Chloroplast
N1NFX4	43225	Uncharacterized protein OS=Arachis hypogaea OX=3818 GN=ARAX_AHF417E07-007 PE=4 SV=1							267.786	Endoplasmic reticulum
Q45L50	43261.8	Resveratrol synthase 3 OS=Arachis hypogaea OX=3818 GN=RS3 PE=2 SV=1		2.64956	2.40869		13.1898			Cytoplasm
A0A345BT89	43268.6	mTERF2 OS=Arachis hypogaea OX=3818 PE=2 SV=1					2.24537			Cell membrane
V9PW63	43299	Putative stilbene synthase OS=Arachis hypogaea OX=3818 PE=3 SV=1					8.76579	3.70403		Cytoplasm
A0A290GJZ4	43449.4	Resistance protein (Fragment) OS=Arachis hypogaea OX=3818 PE=2 SV=1		1.82358						Nucleus
F8UX79	43464.3	Glyceraldehyde-3-phosphate dehydrogenase OS=Arachis hypogaea OX=3818 PE=2 SV=1							14.0691	Chloroplast
D4NYK8	43526.5	Phenylalanine ammonia-lyase (Fragment) OS=Arachis hypogaea OX=3818 GN=PAL PE=2 SV=1						12.0396		Cytoplasm and Cytosol
A0A0K0KBH0	43590.1	Chalcone synthase OS=Arachis hypogaea OX=3818 GN=CHS2 PE=2 SV=1		1.81837						Cytoplasm
I6XQQ7	43650.9	S-adenosylmethionine synthase OS=Arachis hypogaea OX=3818 PE=2 SV=1		2.05393			3.8642		258.914	Cytoplasm and Cytosol
D7RH67;E2GJC2;G9I190;Q5D4Z8;Q94G88;Q9LKK4;Q9LKK6;X4YFV5	43962.5	Omega-6 fatty acid desaturase OS=Arachis hypogaea OX=3818 PE=4 SV=1						5.45597		Endoplasmic reticulum
E2GJC2;D7RH67;G9I190;Q5D4Z8;Q94G88;Q9LKK4;Q9LKK6;G8GUK9;X4YFV5;C8CK29;C8CK30;J9WJV6;J9WJ66;Q94G87	43978.5	Oleate desaturase OS=Arachis hypogaea var. hirsuta OX=887895 GN=FAD2B PE=4 SV=1			3.31685					Endoplasmic reticulum
A0A384QXG9	44023.6	Microsomal delta 15 desaturase OS=Arachis hypogaea OX=3818 GN=FAD3-1 PE=2 SV=1						8.97708	14.6816	Chloroplast
A0A290G089	44030.9	Resistance protein (Fragment) OS=Arachis hypogaea OX=3818 PE=2 SV=1				2.08105		4.87853		Nucleus
E6Y9B0	44171.5	Microsomal omega-6 fatty acid desaturase OS=Arachis hypogaea OX=3818 GN=fad2 PE=2 SV=1		1.66381						Endoplasmic reticulum
A0A290GE49	44432.5	Resistance protein (Fragment) OS=Arachis hypogaea OX=3818 PE=2 SV=1			1.62655	4.97298				Nucleus
A0A0A6ZDS3;A0A075BIU4	44697.8	60S ribosomal protein L4/L1 OS=Arachis hypogaea OX=3818 PE=4 SV=1		2.2323	1.65095			3.87165		Chloroplast
A0A2H4GDD0	44703.6	Resveratrol 3'-dimethylallyltransferase OS=Arachis hypogaea OX=3818 GN=R3'DT-1 PE=2 SV=1		1.8266						Cell membrane
A0A290G4X4	44706.8	Resistance protein (Fragment) OS=Arachis hypogaea OX=3818 PE=2 SV=1		1.52146	1.54224		2.56314			Cytoplasm
N1NJI6	44770.7	Uncharacterized protein OS=Arachis duranensis OX=130453 GN=ARAX_ADH035P21-007 PE=4 SV=1					86.1612			Endoplasmic reticulum
N1NFV9	44845	Putative cytidylyltransferase OS=Arachis duranensis OX=130453 GN=ARAX_ADH079023-072J06-018 PE=4 SV=1		3.73588				6.0121	272.879	Chloroplast
A0A384RFN3	45118.9	Acyl-[acyl-carrier-protein] desaturase OS=Arachis hypogaea OX=3818 GN=FAB2-3 PE=2 SV=1					2.58051		10.9269	Chloroplast
A0A0K0KBH9	45228.8	Squamosa promoter-binding-like protein OS=Arachis hypogaea OX=3818 GN=SPL13 PE=2 SV=1				4.45171			22.5545	Nucleus
A0A290G0H5	45283.6	Resistance protein (Fragment) OS=Arachis hypogaea OX=3818 PE=2 SV=1			1.52279		7.64081	4.12739	3.44873	Nucleus
A0A384QZQ3	45641.1	Palmitoyl-monogalactosyldiacylglycerol delta-7 desaturase OS=Arachis hypogaea OX=3818 GN=FAD5 PE=2 SV=1						5.92635		Endoplasmic reticulum
A0A191UJC0	45733	NAD(P)H-quinone oxidoreductase subunit H_ chloroplastic OS=Arachis hypogaea OX=3818 GN=ndhH PE=3 SV=1		1.98662	7.42272					Chloroplast
F1AM71	46033.3	Lipase OS=Arachis hypogaea OX=3818 PE=2 SV=1					3.18159	4.0401		Nucleus
A0A2H4GDC8;A0A2P9J4Q7	46160.2	Resveratrol 4-dimethylallyltransferase OS=Arachis hypogaea OX=3818 GN=R4DT-1 PE=2 SV=1						44.9066		Cell membrane
A0A384RFK9;A0A384QW95;A0A384RDM5	46456	Microsomal delta 15 desaturase OS=Arachis hypogaea OX=3818 GN=FAD3-2a PE=2 SV=1		1.74212				6.46841		Endoplasmic reticulum
A0A2H4GDC9;A0A2H4GDD3	46472.8	Resveratrol 3'-dimethylallyltransferase OS=Arachis hypogaea OX=3818 GN=R3'DT-3 PE=2 SV=1			1.81576					Cell membrane
E9JSA8;B6ECZ0;E9JSA9	46494.9	Acyl-[acyl-carrier-protein] desaturase OS=Arachis hypogaea OX=3818 GN=SAD1-1 PE=2 SV=1			2.06395					Chloroplast
A0A290G0L9	46500.2	Resistance protein (Fragment) OS=Arachis hypogaea OX=3818 PE=2 SV=1			2.71089					Cell membrane
Q9AWA6	46571.3	Serine/threonine/tyrosine kinase OS=Arachis hypogaea OX=3818 PE=2 SV=1			2.43058				3.13663	Nucleus
A0A290G0N3	46803.4	Resistance protein (Fragment) OS=Arachis hypogaea OX=3818 PE=2 SV=1							329.843	Cell membrane
B2Z3Y4	46898.2	Plasma membrane mannitol transporter (Fragment) OS=Arachis hypogaea OX=3818 GN=MaT2 PE=2 SV=1					4.8034			Cell membran
M4T4B6	46921.3	Growth-regulating factor (Fragment) OS=Arachis hypogaea OX=3818 GN=GRF PE=2 SV=1							64.9452	Nucleus
Q9SW87	47038.5	Acyl-[acyl-carrier-protein] desaturase OS=Arachis hypogaea OX=3818 PE=2 SV=1			1.80635					Chloroplast
A0A190CSF1	47315.3	Eukaryotic translation initiation factor 4A OS=Arachis hypogaea OX=3818 GN=eIF4A PE=2 SV=1			5.09105				4.79788	Nucleus
A0A0K0KBG6	47753.5	Squamosa promoter-binding-like protein OS=Arachis hypogaea OX=3818 GN=SPL2 PE=2 SV=1							26.4548	Nucleus
A0A0R4VP56	47771.5	Ethanolamine-phosphate cytidylyltransferase OS=Arachis hypogaea OX=3818 GN=PECT PE=2 SV=1			3.01759					Chloroplast
N1NKK6	48104.6	Putative oligosaccharide biosynthesis protein OS=Arachis duranensis OX=130453 GN=ARAX_ADH068E04-002 PE=4 SV=1					3.25642		29.0547	Endoplasmic reticulum
Q6PSU4	48151.5	Conarachin (Fragment) OS=Arachis hypogaea OX=3818 PE=2 SV=1			2.81565				4.2173	Vacuole
N1NG06	48153.6	3-ketoacyl-CoA synthase OS=Arachis duranensis OX=130453 GN=ARAX_ADH068E04-005 PE=3 SV=1			1.61481			5.71885		Cytoplasm
V5T8I4	48206.9	Putative MYB-related protein 13 OS=Arachis hypogaea OX=3818 GN=MYB13 PE=4 SV=1						3.87907		Nucleus
N1NJG4	48239.9	Pyruvate dehydrogenase E1 component subunit alpha OS=Arachis duranensis OX=130453 GN=ARAX_ADH18B08-015 PE=4 SV=1				2.15346				Chloroplast
G4X5C6;G4X5C7	48271	ABA response element binding protein 1 OS=Arachis hypogaea OX=3818 GN=AREB1 PE=2 SV=1			4.94635				24.5886	Nucleus
N1NFY7	48578.7	Putative ceramide kinase-related protein OS=Arachis ipaensis OX=130454 GN=ARAX_AIPA147A20-015 PE=4 SV=1						6.78705	9.95716	Chloroplast
A0A2I6PCK5;A0A2I6PCK3	48629.3	Putative prenyltransferase OS=Arachis hypogaea OX=3818 GN=RPT-10d4 PE=2 SV=1						8.57953		Cell membrane
N1NEW5	48638	Uncharacterized protein OS=Arachis duranensis OX=130453 GN=ARAX_ADH51I17-83F22-002 PE=4 SV=1				1.8721			2.41721	Golgi apparatus
N1NFV2	48975.9	S-acyltransferase OS=Arachis duranensis OX=130453 GN=ARAX_ADH18B08-010 PE=3 SV=1			3.46058		3.26642			Golgi apparatus
D8KXY9;E6Y9A7;D8KXY8	50472.2	Beta-ketoacyl-ACP synthase I-2 OS=Arachis hypogaea OX=3818 GN=KASI-2 PE=2 SV=1					2.17532			Chloroplast
A0A0B6W1Z3	50657.6	Non-specific serine/threonine protein kinase OS=Arachis hypogaea OX=3818 GN=sos2 PE=2 SV=1		1.95371				2.86504		Nucleus
A0A290G0M2	50731.5	Resistance protein (Fragment) OS=Arachis hypogaea OX=3818 PE=2 SV=1						4.77929		Nucleus
N1NF45	51366.9	Putative serine carboxypeptidase OS=Arachis duranensis OX=130453 GN=ARAX_ADH068E04-009 PE=3 SV=1		1.72154					26.4666	Vacuole
A0A0K0KBH6	51400	Squamosa promoter-binding-like protein OS=Arachis hypogaea OX=3818 GN=SPL6 PE=2 SV=1			4.89453					Nucleus
A0A384RFP1	51863.1	Plastidial delta 15 desaturase OS=Arachis hypogaea OX=3818 GN=FAD7-2 PE=2 SV=1					9.09968	6.74645		Endoplasmic reticulum
A0A191UJ61	52091.1	Photosystem II CP43 reaction center protein OS=Arachis hypogaea OX=3818 GN=psbC PE=3 SV=1					7.74697			Chloroplast
E6Y9A8	52098.4	Chloroplast omega-6 fatty acid desaturase OS=Arachis hypogaea OX=3818 GN=fad6 PE=2 SV=1	2.96398	1.62925	1.95021					Chloroplast
H6QXH1	52105.6	Sphingolipid delta-8 desaturase OS=Arachis hypogaea OX=3818 GN=delta 8 PE=2 SV=1				2.80581	2.17533			Endoplasmic reticulum
A0A290GK82	52193.5	Resistance protein (Fragment) OS=Arachis hypogaea OX=3818 PE=2 SV=1		1.86555	2.93132		2.4687			Cytoplasm
A0A384QWC4;A0A140WLY7	52250.8	Plastidial delta 15 desaturase OS=Arachis hypogaea OX=3818 GN=FAD7-1b PE=2 SV=1				2.3315				Endoplasmic reticulum
A0A384QWE0	52468.1	Sphingolipid delta8 desaturase OS=Arachis hypogaea OX=3818 GN=SLD1-3 PE=2 SV=1			3.61588			3.20952		Endoplasmic reticulum
A0A290G5C2	52484.6	Resistance protein (Fragment) OS=Arachis hypogaea OX=3818 PE=2 SV=1					23.223			Cell membrane
A0A384QZP9	52489.2	Sphingolipid delta8 desaturase OS=Arachis hypogaea OX=3818 GN=SLD1-2 PE=2 SV=1			2.06169			19.3035		Endoplasmic reticulum
A0A140WLY7;A0A384QWC4;A0A187G9L3	52638.1	Omega-3 fatty acid desaturase OS=Arachis hypogaea OX=3818 GN=FAD8 PE=2 SV=1						1.55024		Chloroplast
A0A290GKC9	52707.2	Resistance protein (Fragment) OS=Arachis hypogaea OX=3818 PE=2 SV=1	1.6588	3.79158				1.51531		Cell membrane
A0A2R9ZPY0	52857.2	Arachin Ahy-2 OS=Arachis hypogaea OX=3818 PE=4 SV=1			1.94094		1.72198	9.8778		Vacuole
A0A023IUM3	52940.2	Histone deacetylase OS=Arachis hypogaea OX=3818 GN=HDA1 PE=2 SV=1		1.62425	1.76829					Cytoplasm
A0A191UJ50;A0A075M4S4;A0A075M4X4;A0A075M981;O20356;A0A2D1BXD9;A0A2S0DEU8;A9YSZ2	53043.1	Ribulose bisphosphate carboxylase large chain OS=Arachis hypogaea OX=3818 GN=rbcL PE=3 SV=1					3.66003	7.87526		Chloroplast
A0A0K0K9Q6	53748.9	Glyceraldehyde-3-phosphate dehydrogenase OS=Arachis diogoi OX=170720 PE=2 SV=1			2.35094			8.94709		Cytoplasm
H9L6X4	53799.1	UDP-sulfoquinovose synthase OS=Arachis hypogaea OX=3818 GN=SQD1 PE=2 SV=1			2.23066		21.5606			Chloroplast
A0A191UJ49	53837	ATP synthase subunit beta_ chloroplastic OS=Arachis hypogaea OX=3818 GN=atpB PE=3 SV=1						6.70886		Chloroplast
N1NG39	53895.3	Putative single-stranded DNA binding protein OS=Arachis duranensis OX=130453 GN=ARAX_ADH068E04-008 PE=4 SV=1			2.0254		3.97456	3.37959		Chloroplast.
A0A345BT88	53976.6	mTERF1 OS=Arachis hypogaea OX=3818 PE=2 SV=1						3.47711		Chloroplast
I6N3H4	54289.7	Vacuolar processing enzyme OS=Arachis diogoi OX=170720 PE=2 SV=1		2.49218			45.146			Vacuole
A0A0K0KBH5	54730.7	Glycosyltransferase OS=Arachis hypogaea OX=3818 GN=UGT PE=2 SV=1						21.2263		Chloroplast
A0A158UWU4	54760.1	NAD(P)H-quinone oxidoreductase subunit 2_ chloroplastic OS=Arachis hypogaea OX=3818 GN=ndhB PE=3 SV=1						3.97032		Chloroplast
A0A290GK23	54786.7	Resistance protein (Fragment) OS=Arachis hypogaea OX=3818 PE=2 SV=1			5.01138					Cell membrane
Q647H2	55024.9	Arachin Ahy-3 OS=Arachis hypogaea OX=3818 PE=1 SV=1		1.62252				1.61571	2.53042	Vacuole
W5QV07	55064.7	Nonexpressor of pathogenesis-related protein 1 OS=Arachis rigonii OX=224335 GN=NPR1 PE=2 SV=1	3.02139	2.55331	7.39464			1.6789		Nucleus
A0A290G024	55234.9	Resistance protein (Fragment) OS=Arachis hypogaea OX=3818 PE=2 SV=1			2.6651	2.53238	5.33523		11.4989	Cell membrane
U6NJF1;K4PM24	55281.2	ABA 8'-hydroxylase OS=Arachis hypogaea OX=3818 GN=CYP707A2 PE=2 SV=1			1.86773			9.98289		Endoplasmic reticulum
J9PI84	55553.2	Divalent metal transporter 1 OS=Arachis hypogaea OX=3818 GN=Dmt1 PE=3 SV=1							9.83004	Cell membrane
A0A290G0G5	55680.9	Resistance protein (Fragment) OS=Arachis hypogaea OX=3818 PE=2 SV=1			3.32372		9.7042	8.76571	7.04266	Cell wall
A0A191UJ70	55741.8	ATP synthase subunit alpha_ chloroplastic OS=Arachis hypogaea OX=3818 GN=atpA PE=3 SV=1		3.35949	5.09872			6.92225		Mitochondrion
A0A290G0J8	55816.5	Resistance protein (Fragment) OS=Arachis hypogaea OX=3818 PE=2 SV=1		2.08615						Cell membrane
A0A385H5K6	55887.6	Protein DETOXIFICATION OS=Arachis hypogaea OX=3818 GN=FRDL1 PE=3 SV=1			67.8235			14.6197		Cell membrane
A0A0R4UXP7	56052.5	Glycerol-3-phosphate acyltransferase 6 OS=Arachis hypogaea OX=3818 GN=GPAT6 PE=2 SV=1					2.49716			Mitochondrion
N1NJP9	56171.1	Putative aminotransferase family protein OS=Arachis ipaensis OX=130454 GN=ARAX_AIPA147A20-016 PE=4 SV=1						11.3994	33.2186	Chloroplast
A0A191UJ98	56298.4	Photosystem II CP47 reaction center protein OS=Arachis hypogaea OX=3818 GN=psbB PE=3 SV=1	1.90547		1.65031		5.47602			Chloroplast
A0A290G503	56323.7	Resistance protein (Fragment) OS=Arachis hypogaea OX=3818 PE=2 SV=1		1.70595	1.83972					Cell membrane
G8XV93	56360.2	Acetyl-CoA carboxylase carboxyltransferase beta subunit OS=Arachis hypogaea OX=3818 PE=2 SV=1						14.6661		Chloroplast
E6Y6S1;E6Y6S0	56364.1	Acetyl-coenzyme A carboxylase carboxyl transferase subunit beta_ chloroplastic OS=Arachis hypogaea OX=3818 GN=accD2 PE=2 SV=1			4.8445		4.38659	2.60585		Chloroplast
A0A290GK39	56428.8	Resistance protein (Fragment) OS=Arachis hypogaea OX=3818 PE=2 SV=1						5.57691	3.53852	Cell membrane
A0A290G010	56634.9	MLO-like protein (Fragment) OS=Arachis hypogaea OX=3818 GN=MLO PE=2 SV=1		1.60271	3.81837		2.48701			Cell membrane
A0A290GJU6	56690.1	Resistance protein (Fragment) OS=Arachis hypogaea OX=3818 PE=2 SV=1		2.07895	2.40519					Cell membrane
I1E3D2;A0A0N7CRG1	56704.3	3-ketoacyl-CoA synthase OS=Arachis hypogaea OX=3818 GN=kcs PE=2 SV=1			1.62738		4.17877			Cytoplasm
G4WJT1	56816.9	Sucrose synthase (Fragment) OS=Arachis hypogaea var. vulgaris OX=925390 GN=susy PE=2 SV=1		1.79784	2.17344					Chloroplast
A0A191UJB6;A0A1C7D2B5	57092.1	NAD(P)H-quinone oxidoreductase chain 4_ chloroplastic OS=Arachis hypogaea OX=3818 GN=ndhD PE=3 SV=1					3.00524			Chloroplast
A0A385I5T0;A0A385I5U4	57544.5	3-ketoacyl-CoA synthase OS=Arachis hypogaea OX=3818 GN=FAE1-B PE=3 SV=1			2.1627					Cytoplasm
A0A290G513	57667.1	Resistance protein (Fragment) OS=Arachis hypogaea OX=3818 PE=2 SV=1			2.24924	3.92862				Nucleus
G9I5H9	57667.6	F3'H OS=Arachis hypogaea OX=3818 PE=2 SV=1						3.61246		Endoplasmic reticulum
Q4U4M3	57706	Subtilisin-like protease (Fragment) OS=Arachis hypogaea OX=3818 PE=2 SV=1						2.62136		Cell membrane
A0A290G0J0	57975.4	Resistance protein (Fragment) OS=Arachis hypogaea OX=3818 PE=2 SV=1	1.51983		2.05552	2.82963	2.5381	6.12889		Cell membrane
B4YA12	58212.4	Calcium calmodulin-dependent protein kinase (Fragment) OS=Arachis hypogaea OX=3818 GN=CCaMK PE=2 SV=1			2.2804			8.03216		Nucleus
A0A088LHH3	58297.4	Beta-amyrin 24-hydroxylase CYP93E4 OS=Arachis hypogaea OX=3818 PE=2 SV=1					2.08531			Endoplasmic reticulum
X2C0H4	58519.2	Cyclops OS=Arachis hypogaea OX=3818 GN=IPD3 PE=2 SV=2		2.58658	2.78159		2.07995			Nucleus
A0A290G0M8	58538.3	Resistance protein (Fragment) OS=Arachis hypogaea OX=3818 PE=2 SV=1		1.64696						Cytoplasm
O82580	58577.9	Glycinin (Fragment) OS=Arachis hypogaea OX=3818 GN=Arah3 PE=2 SV=1			2.31767					Vacuole
J7ILM4;A0A2R2N6F0	59176.5	Natural resistance-associated macrophage protein 1 OS=Arachis hypogaea OX=3818 GN=NRAMP1 PE=2 SV=1		2.19791	8.64573			34.1279		Cell membrane
N1NJH5	59232.3	3-ketoacyl-CoA synthase OS=Arachis duranensis OX=130453 GN=ARAX_ADH18B08-007 PE=3 SV=1					2.76956			Cytoplasm
E6Y9A4	59257.8	Biotin carboxylase OS=Arachis hypogaea OX=3818 GN=BC PE=2 SV=1			3.26181			3.71365	11.1853	Mitochondrion
A0A291I2L1	59392.2	O-acyltransferase OS=Arachis hypogaea OX=3818 GN=DGAT1.3 PE=2 SV=1					1.71283	1.72934		Endoplasmic reticulum
D8KXZ0	59537.8	Beta-ketoacyl-ACP synthase II-1 OS=Arachis hypogaea OX=3818 GN=KASII-1 PE=2 SV=1			41.3391		5.11013		29.1251	Chloroplast
E6Y6R4;E6Y6R7	59545.2	Biotin carboxylase OS=Arachis hypogaea OX=3818 GN=BC1 PE=2 SV=1						11.0027		Mitochondrion
A0A290G0A4	59667.7	Resistance protein (Fragment) OS=Arachis hypogaea OX=3818 PE=2 SV=1				8.08782				Plasma membrane
C0L2V9	59749.8	Putative reverse transcriptase OS=Arachis hypogaea OX=3818 PE=4 SV=1							3.00493	Nucleus
N1NG34	60207.6	Putative mitochondrial carrier protein OS=Arachis duranensis OX=130453 GN=ARAX_ADH068E04-003 PE=3 SV=1						8.18284		Mitochondrion
N1NJM1	60407	Uncharacterized protein OS=Arachis duranensis OX=130453 GN=ARAX_ADH177M04-005 PE=4 SV=1				2.201		2.50592		Cytoplasm
A0A0M3SGK9;A0A291I2R1;A0A291I2R4;A0A291I2M2;A0A088BBQ0;A0A0M4JSI4	60430.3	O-acyltransferase OS=Arachis hypogaea OX=3818 GN=DGAT1 PE=3 SV=1			2.70965					Cell membrane
A0A290G050	60465.8	Resistance protein (Fragment) OS=Arachis hypogaea OX=3818 PE=2 SV=1							20.3006	Cell wall
Q9TK06	60609.2	Maturase K OS=Arachis pintoi OX=108216 GN=matK PE=3 SV=1			3.21636					Chloroplast
A1DZF0	60717.6	Arachin 6 OS=Arachis hypogaea OX=3818 PE=2 SV=1		3.3006				5.1549	4.27693	Vacuole
Q9FZ11	60790.7	Gly1 OS=Arachis hypogaea OX=3818 GN=Gly1 PE=2 SV=1			1.80936			2.87561		Vacuole
N1NKA3	60879.7	Putative arachin OS=Arachis duranensis OX=130453 GN=ARAX_ADH18B08-003 PE=3 SV=1			1.81054	19.7454		2.40919		Vacuole
B5TYU1	60965.8	Arachin Arah3 isoform OS=Arachis hypogaea OX=3818 PE=1 SV=1						2.1114		Vacuole
Q5I6T2	61077.8	Arachin Ahy-4 OS=Arachis hypogaea OX=3818 PE=2 SV=1			1.50027			2.40919		Vacuole
V5T6P4	61288.8	Putative MYB-related protein 12 OS=Arachis hypogaea OX=3818 GN=MYB12 PE=4 SV=1	1.66072					5.22105	20.1663	Nucleus
Q9SQH7	61467.3	Glycinin OS=Arachis hypogaea OX=3818 GN=Arah4 PE=2 SV=1		2.53669				3.81715		Vacuole
A0A290G021;H6U5A0	61527.7	Resistance protein (Fragment) OS=Arachis hypogaea OX=3818 PE=2 SV=1						4.95363		Nucleus
V5M2Y8	61531	Calcium-dependent protein kinase OS=Arachis hypogaea OX=3818 GN=CDPK PE=2 SV=1		1.50309	2.7875		7.09887			Nucleus
Q647H4;Q8LL03	61847.8	Arachin Ahy-1 OS=Arachis hypogaea OX=3818 PE=2 SV=1		2.11382	2.60962			1.91371		Vacuole
Q647H3	61873.8	Arachin Ahy-2 OS=Arachis hypogaea OX=3818 PE=2 SV=1					2.57929			Vacuole
A0A0R4UXR8	62621.3	Glycerol-3-phosphate acyltransferase 2 OS=Arachis hypogaea OX=3818 GN=GPAT2 PE=2 SV=1			8.93204		4.13384			Mitochondrion
N1NFZ4	63210.1	Putative mitochondrial carrier protein OS=Arachis ipaensis OX=130454 GN=ARAX_AIPA147A20-003 PE=3 SV=1					3.7533	48.7793		Mitochondrion
A0A023IUN7	63590.4	Histone deacetylase OS=Arachis hypogaea OX=3818 PE=2 SV=1						1.53062		Chloroplast
A0A290GK49	64662.6	Resistance protein (Fragment) OS=Arachis hypogaea OX=3818 PE=2 SV=1	1.64068		1.71839	2.96408		2.10906		Cell membrane
A0A2S0BYZ2;U3LXU9	65930.8	Nod-factor receptor 5 OS=Arachis hypogaea subsp. hypogaea OX=226205 GN=NFP PE=2 SV=1				1.78833			352.105	Cell membrane
G0Y6T3	66561	RNA-directed DNA polymerase OS=Arachis hypogaea OX=3818 GN=303L13_3 PE=4 SV=1		1.72451			2.91162			Chloroplast
Q70KY0	67364.7	9-cis-epoxycarotenoid dioxygenase OS=Arachis hypogaea OX=3818 GN=NCED1 PE=2 SV=1			1.8897	7.53071				Chloroplast
A0A143FQT2;E2DQZ0	69100.3	Zinc-binding alcohol dehydrogenase 2 OS=Arachis diogoi OX=170720 GN=ZADH2 PE=2 SV=1		1.98965	2.22457				51.8266	Cytoplasm
C0L2U2	69183.1	Putative mutator sub-class protein OS=Arachis hypogaea OX=3818 PE=4 SV=1						4.72513		Chloroplast
E3JPR8	69560.6	Mitogen-activated protein kinase OS=Arachis diogoi OX=170720 PE=2 SV=1						2.68007		Nucleus
P43237;B3IXL2;Q6PSU3;N1NEW2	70682.3	Allergen Ara h 1_ clone P17 OS=Arachis hypogaea OX=3818 PE=1 SV=1			2.82332		2.10506		3.2636	Vacuole
A0A1S6R4X1	74704.1	Abscisic acid transporter-like protein 1 OS=Arachis hypogaea OX=3818 PE=2 SV=1			1.74503					Cell membrane
T1Q5U1	74951.8	Yellow stripe-like transporter 3.1 OS=Arachis hypogaea OX=3818 GN=YSL3.1 PE=2 SV=1					18.9781	2.55247		Cell membrane
A0A109QJM5	75064	Long chain acyl-CoA synthetase 4 OS=Arachis hypogaea OX=3818 GN=LACS4 PE=2 SV=1			12.3194			7.27829		Peroxisome
G0Y6U6	76369.2	Transposon protein OS=Arachis hypogaea OX=3818 GN=303L13_16 PE=4 SV=1		1.5465		1.72059				Chloroplast
Q647H1	76389.6	Conarachin OS=Arachis hypogaea OX=3818 PE=2 SV=1		2.06066	4.72182	6.46797				Vacuole
A0A0Y0AMC0	77247	Long chain acyl-CoA synthetase 6 OS=Arachis hypogaea OX=3818 GN=LACS6 PE=2 SV=1			3.64876					Peroxisome
G0Y6V7	78031.9	Transposon protein OS=Arachis hypogaea OX=3818 GN=205D04_7 PE=4 SV=1			2.02255					Nucleus
A0A1L2K239	79293.9	Phytochrome interacting factor 3 OS=Arachis hypogaea OX=3818 GN=PIF3 PE=2 SV=1						4.08193		Nucleus
F1AM70	79428.3	Triacylglycerol lipase 1 OS=Arachis hypogaea OX=3818 PE=2 SV=1						5.48821		Nucleus
G0Y6U0	79493	RNA-directed DNA polymerase OS=Arachis hypogaea OX=3818 GN=303L13_10 PE=4 SV=1			1.89991	3.07785	6.92895			Chloroplast
A0A290G080	79640	Resistance protein (Fragment) OS=Arachis hypogaea OX=3818 PE=2 SV=1			1.74885		4.506	4.47823		Cell membrane
A0A191UJ67;A0A1C7D268;I7E3I3	80086.4	DNA-directed RNA polymerase subunit beta' OS=Arachis hypogaea OX=3818 GN=rpoC1 PE=3 SV=1	2.56446					5.19759		Chloroplast
A0A191UJ57;A0A2Z5HVZ0	83418.9	Photosystem I P700 chlorophyll a apoprotein A1 OS=Arachis hypogaea OX=3818 GN=psaA PE=3 SV=1						6.47575		Chloroplast
E6Y6R8	83948	Alpha-carboxyltransferase 1 OS=Arachis hypogaea OX=3818 GN=accA1 PE=2 SV=1		1.62648				3.86429	7.80018	Mitochondrion
A0A0D4CI71	84618.9	Lipoxygenase (Fragment) OS=Arachis hypogaea OX=3818 GN=LOX8_H07 PE=2 SV=1						4.4542		Cytoplasm
N1NFR5	85631.3	Putative COG transport protein OS=Arachis duranensis OX=130453 GN=ARAX_ADH18B08-014 PE=4 SV=1			2.89339			9.91913		Nucleus
A0A191UJB5	86041.6	NAD(P)H-quinone oxidoreductase subunit 5_ chloroplastic OS=Arachis hypogaea OX=3818 GN=ndhF PE=3 SV=1					2.12014			Chloroplast
A0A0A7DZM8	86281.2	CLC OS=Arachis hypogaea OX=3818 PE=2 SV=1			1.83089		3.28555		12.2252	Cell membrane
G0Y6T4	86495.8	Uncharacterized protein OS=Arachis hypogaea OX=3818 GN=303L13_4 PE=4 SV=1	1.54957		1.52701		6.3621	8.58681	22.9687	Nucleus
N1NFZ0	88679.4	Glycerol-3-phosphate dehydrogenase OS=Arachis duranensis OX=130453 GN=ARAX_ADH129F24-002 PE=4 SV=1							235.941	Chloroplast
N1NFW5	89151.1	Uncharacterized protein OS=Arachis duranensis OX=130453 GN=ARAX_ADH167F07-004 PE=4 SV=1			8.13467			2.08726		Nucleus
G0Y6V8	89585.2	Uncharacterized protein OS=Arachis hypogaea OX=3818 GN=205D04_8 PE=4 SV=1		1.57014		7.98199		3.02039		Nucleus
A0A0K0KCL8	90576.5	Squamosa promoter-binding-like protein OS=Arachis hypogaea OX=3818 GN=SPL7 PE=2 SV=1			54.7353		2.13401			Cytoplasm
A0A0R4VUF1	91123	Digalactosyldiacylglycerol synthase 1 OS=Arachis hypogaea OX=3818 GN=DGD1 PE=2 SV=1					7.93304			Chloroplast
Q2HWT7	91271.7	Phospholipase D OS=Arachis hypogaea OX=3818 GN=plda1 PE=2 SV=1					4.94234			Cytoplasm
A0A290GI17;A0A290G068	92220.7	Resistance protein (Fragment) OS=Arachis hypogaea OX=3818 PE=2 SV=1		1.61729	3.37884			5.70155		Cell membrane
A0A2H4V2F5	92312.5	NBS-LRR type disease resistance protein OS=Arachis hypogaea OX=3818 PE=2 SV=1		2.20319					3.65332	Cell membrane
A0A290GKF7	92328.9	Resistance protein (Fragment) OS=Arachis hypogaea OX=3818 PE=2 SV=1		1.74864						Cell membrane
Q2HWT8;Q4U4M4	92397.7	Phospholipase D OS=Arachis hypogaea OX=3818 GN=plda2 PE=2 SV=1							6.95424	Vacuole
G0Y6V0;Q2KQ67	98717	TIR-NBS-LRR-TIR type disease resistance protein OS=Arachis hypogaea OX=3818 GN=303L13_20 PE=3 SV=1	5.58291	2.77566						Cell membrane
A0A290GKE9	98735.2	Resistance protein (Fragment) OS=Arachis hypogaea OX=3818 PE=2 SV=1		2.17251			2.23037			Cell membrane
A0A1V0QSX8;Q2KPZ2;Q2KPY6	103869	NBS-LRR type disease resistance protein OS=Arachis hypogaea OX=3818 PE=2 SV=1		2.03296			5.00421			Cytoplasm
N1NFV5	103978	Glycoside hydrolase OS=Arachis duranensis OX=130453 GN=ARAX_ADH079023-072J06-012 PE=3 SV=1			3.30567					Cell wall
E6YC17	104574	Symbiosis receptor kinase SymRK OS=Arachis hypogaea OX=3818 PE=1 SV=2		1.57052				6.05041		Cell wall
N1NKB6;Q6YDC6;Q2KPZ8;Q2KQ22	104738	TIR NB-ARC LRR protein (Fragment) OS=Arachis duranensis OX=130453 GN=ARAX_ADH25F09-006 PE=4 SV=1					2.46614		90.4897	Cell membrane
G0Y6U4	104783	Retrotransposon gag protein OS=Arachis hypogaea OX=3818 GN=303L13_14 PE=4 SV=1				4.00886				Nucleus.
I3WWD5	104902	SYMRK OS=Arachis hypogaea OX=3818 PE=2 SV=1			1.5626	4.56002		5.60552		Cell membrane.
N1NFY2	105408	Putative Zinc finger_ C3HC4 type (RING finger) OS=Arachis ipaensis OX=130454 GN=ARAX_AIPA147A20-009 PE=4 SV=1			7.6972			3.86414		Nucleus
G0Y6W5	106842	TIR-NBS-LRR type disease resistance protein OS=Arachis hypogaea OX=3818 GN=205D04_15 PE=4 SV=1			3.70189			5.17798	11.0252	Cytoplasm
A0A1B1H1X1	110834	Histidine kinase 1 (Fragment) OS=Arachis hypogaea OX=3818 GN=HK1 PE=2 SV=1				38.7143		13.329		Nucleus
C9W979	110999	Phosphoenolpyruvate carboxylase OS=Arachis hypogaea OX=3818 GN=PEPC3 PE=2 SV=1			2.38326			2.72248		Cytoplasm
A0A0K0KBI1	112144	Squamosa promoter-binding-like protein OS=Arachis hypogaea OX=3818 GN=SPL12 PE=2 SV=1			2.42486					Nucleus
N1NEV1;Q2KPK3;Q2KPL0;Q2KPL9;Q2KPM5	112366	NB-ARC LRR protein OS=Arachis duranensis OX=130453 GN=ARAX_ADH25F09-001 PE=3 SV=1			2.21731	5.59716				Cell membrane
N1NJL5	112491	Predicted WD40 domain containing protein OS=Arachis duranensis OX=130453 GN=ARAX_ADH123K13-001 PE=4 SV=1		1.7145	1.88558					Nucleus
N1NK89	113753	Uncharacterized protein OS=Arachis duranensis OX=130453 GN=ARAX_ADH18B08-021 PE=4 SV=1			2.1002		5.73957			Nucleus
A0A0K0KBH2	114757	Squamosa promoter-binding-like protein OS=Arachis hypogaea OX=3818 GN=SPL1 PE=2 SV=1			4.20253		2.73773	2.08058	19.547	Nucleus
N1NFV7	115772	TIR NB-ARC LRR protein OS=Arachis duranensis OX=130453 GN=ARAX_ADH25F09-007 PE=4 SV=1				8.04776		3.29835		Cell membrane
A0A2I4UMI9	116558	Histidine kinase 3 OS=Arachis hypogaea OX=3818 GN=HK3 PE=2 SV=1			7.98702		1.97725			Nucleus
C9W981	117223	Phosphoenolpyruvate carboxylase OS=Arachis hypogaea OX=3818 GN=PEPC5 PE=2 SV=1		2.19531	2.15122			5.83952		Cytoplasm
N1NJR9	122758	Putative gyrase protein OS=Arachis duranensis OX=130453 GN=ARAX_ADH068E04-006 PE=4 SV=1			2.14842		2.5335	4.74646		Mitochondrion
N1NFS7;G0Y6W0;G0Y6V2	123574	TIR NB-ARC LRR protein OS=Arachis duranensis OX=130453 GN=ARAX_ADH25F09-002 PE=4 SV=1			3.03486					Cell membrane
A0A290G0E7	124193	Resistance protein (Fragment) OS=Arachis hypogaea OX=3818 PE=2 SV=1		1.79874	4.27731				13.7451	Cell membrane
A0A286KCL1	124734	Phytochrome OS=Arachis hypogaea OX=3818 GN=phyE PE=2 SV=1			4.55752	1.96708	3.49117	2.27817		Nucleus
E3P7J8;E3NYH1	126708	TIR-NB-LRR resistance protein OS=Arachis diogoi OX=170720 PE=2 SV=1		2.29893				7.46203		Cytoplasm
G0Y6T6	127944	WD40-like protein OS=Arachis hypogaea OX=3818 GN=303L13_6 PE=4 SV=1			2.48173					Golgi apparatus
G0Y6V1;Q2KQ45	128316	NBS-LRR type disease resistance protein OS=Arachis hypogaea OX=3818 GN=205D04_1 PE=3 SV=1			4.53201					Cell membrane
N1NEU8	130267	Uncharacterized protein OS=Arachis duranensis OX=130453 GN=ARAX_ADH18B08-005 PE=4 SV=1					9.84446	2.37063		Chloroplast
A0A2I4UIV5	140830	Histidine kinase 2 OS=Arachis hypogaea OX=3818 GN=HK2 PE=2 SV=1			3.29479			4.849		Nucleus
D8KXX2	149832	AO2 OS=Arachis hypogaea OX=3818 PE=2 SV=1			9.11876			5.6065		Chloroplast
N1NJR4	161213	Putative glycosyl phosphatidyl inositol transamidase like protein OS=Arachis duranensis OX=130453 GN=ARAX_ADH068E04-001 PE=4 SV=1						8.60829		Chloroplast
G0Y6X0	185129	Uncharacterized protein OS=Arachis hypogaea OX=3818 GN=205D04_20 PE=4 SV=1		1.81639	2.9262	4.44675	3.168			Nucleus
G0Y6U9	185283	RNA-directed DNA polymerase OS=Arachis hypogaea OX=3818 GN=303L13_19 PE=4 SV=1					9.11075	5.76922		Chloroplast
A0A1C7D2B7;A0A191UJB2	211002	Protein TIC 214 OS=Arachis hypogaea OX=3818 GN=ycf1 PE=3 SV=1			1.91685			4.71305		Chloroplast
A0A0H4M677;A0A0H4LQC5	222884	NBS-LRR type disease resistance protein OS=Arachis hypogaea OX=3818 GN=PDR1 PE=2 SV=1			3.26488			8.52219		Chloroplast
G0Y6W1	224533	TIR-NBS-LRR type disease resistance protein OS=Arachis hypogaea OX=3818 GN=205D04_11 PE=3 SV=1			3.10458					Cell membrane

## Sheet: Table S9
Table S9. Fungal proteins upregulated in Aspergillus flavus colonizing 4RNAi-HIGS lines expressing nsdC, veA, aflR and aflM genes during infection
Accession	Mass	Description	0 h	30 h	48 h	72 h	Subcellular localization
Q5B4S6	10370.3	Cytochrome c oxidase-assembly factor cox23_ mitochondrial OS=Emericella nidulans (strain FGSC A4 / ATCC 38163 / CBS 112.46 / NRRL 194 / M139) OX=227321 GN=cox23 PE=3 SV=2	2.23737			2.55287	Mitochondria
Q4WY33	12078.4	Non-histone chromosomal protein 6 OS=Neosartorya fumigata (strain ATCC MYA-4609 / Af293 / CBS 101355 / FGSC A1100) OX=330879 GN=nhp6 PE=3 SV=1				1.93509	Nucleus
Q5BB99	12795.6	Transcription initiation factor IIA subunit 2 OS=Emericella nidulans (strain FGSC A4 / ATCC 38163 / CBS 112.46 / NRRL 194 / M139) OX=227321 GN=toa2 PE=3 SV=1		2.42283			Nucleus
A4DA73;B0YEJ3;A1D9R4	13192.8	Mitochondrial zinc maintenance protein 1_ mitochondrial OS=Neosartorya fumigata (strain ATCC MYA-4609 / Af293 / CBS 101355 / FGSC A1100) OX=330879 GN=MZM1 PE=3 SV=2		1.59036			Mitochondria
Q9Y708	13594.6	rRNA-processing protein cgrA OS=Emericella nidulans (strain FGSC A4 / ATCC 38163 / CBS 112.46 / NRRL 194 / M139) OX=227321 GN=cgrA PE=3 SV=2			4.21184		Nucleus
Q0C8A2	16248.3	Isomerase trt14 OS=Aspergillus terreus (strain NIH 2624 / FGSC A1156) OX=341663 GN=trt14 PE=1 SV=1		1.57318			Cytoskeleton
Q5B8Y4;Q4WX89	16812.3	Multiprotein-bridging factor 1 OS=Emericella nidulans (strain FGSC A4 / ATCC 38163 / CBS 112.46 / NRRL 194 / M139) OX=227321 GN=mbf1 PE=3 SV=1			2.21605		Nucleus
Q4WQY7	16939.3	Probable decarboxylase tpcK OS=Neosartorya fumigata (strain ATCC MYA-4609 / Af293 / CBS 101355 / FGSC A1100) OX=330879 GN=tpcK PE=2 SV=1				6.27117	Mitochondria
Q4WLA7;Q96UP5	17226.4	Ubiquitin-conjugating enzyme E2 2 OS=Neosartorya fumigata (strain ATCC MYA-4609 / Af293 / CBS 101355 / FGSC A1100) OX=330879 GN=ubc2 PE=3 SV=1				72.2091	Nucleus
Q4WS49;Q5BFF8	17260.8	AP-2 complex subunit sigma OS=Neosartorya fumigata (strain ATCC MYA-4609 / Af293 / CBS 101355 / FGSC A1100) OX=330879 GN=aps2 PE=3 SV=1			2.62532		Plasma membrane
A1CL91	17916.6	Mediator of RNA polymerase II transcription subunit 31 OS=Aspergillus clavatus (strain ATCC 1007 / CBS 513.65 / DSM 816 / NCTC 3887 / NRRL 1) OX=344612 GN=soh1 PE=3 SV=1		3.25194	1.54102		Nucleus
Q0CGL5	18360.7	Nascent polypeptide-associated complex subunit beta OS=Aspergillus terreus (strain NIH 2624 / FGSC A1156) OX=341663 GN=egd1 PE=3 SV=1			2.44906		Nucleus
A1DMW6	19062.5	Ubiquitin-like protein ATG12 OS=Neosartorya fischeri (strain ATCC 1020 / DSM 3700 / CBS 544.65 / FGSC A1164 / JCM 1740 / NRRL 181 / WB 181) OX=331117 GN=atg12 PE=3 SV=2				3.13789	Nucleus
Q5BHG4	19294.6	Lactobacillus up-regulated protein OS=Emericella nidulans (strain FGSC A4 / ATCC 38163 / CBS 112.46 / NRRL 194 / M139) OX=227321 GN=lbuA PE=1 SV=2			2.11812		Extracellular matrix
A2QPT2	19522.1	Type 1 phosphatases regulator ypi1 OS=Aspergillus niger (strain CBS 513.88 / FGSC A1513) OX=425011 GN=ypi1 PE=3 SV=1	5.28451		2.87922	2.47968	Nucleus
Q2U4W2	19785.3	Molybdopterin synthase catalytic subunit OS=Aspergillus oryzae (strain ATCC 42149 / RIB 40) OX=510516 GN=cnxH PE=3 SV=1			2.62833	1.58264	Cytoplasm
P67875;P67876	19823.3	Ribonuclease mitogillin OS=Neosartorya fumigata (strain ATCC MYA-4609 / Af293 / CBS 101355 / FGSC A1100) OX=330879 GN=mitF PE=1 SV=1			1.52614		Extracellular matrix
C8V9B7	20205	Inosine triphosphate pyrophosphatase OS=Emericella nidulans (strain FGSC A4 / ATCC 38163 / CBS 112.46 / NRRL 194 / M139) OX=227321 GN=AN8861 PE=3 SV=1			25.0704		Cytoplasm
Q4WRB8	20361.1	Translationally-controlled tumor protein homolog OS=Neosartorya fumigata (strain ATCC MYA-4609 / Af293 / CBS 101355 / FGSC A1100) OX=330879 GN=AFUA_1G16840 PE=3 SV=1				5.63907	Cytoplasm
A1DL98;A1CMP1;Q4WCX4	20478.3	Nascent polypeptide-associated complex subunit beta OS=Neosartorya fischeri (strain ATCC 1020 / DSM 3700 / CBS 544.65 / FGSC A1164 / JCM 1740 / NRRL 181 / WB 181) OX=331117 GN=egd1 PE=3 SV=1			8.87602		Cytoplasm
Q2TX99	20750.8	Inosine triphosphate pyrophosphatase OS=Aspergillus oryzae (strain ATCC 42149 / RIB 40) OX=510516 GN=AO090010000228 PE=3 SV=1			16.8245		Cytoplasm
A1CHC5	20778.7	Respiratory supercomplex factor 1_ mitochondrial OS=Aspergillus clavatus (strain ATCC 1007 / CBS 513.65 / DSM 816 / NCTC 3887 / NRRL 1) OX=344612 GN=rcf1 PE=3 SV=1			2.01556		Cytoplasm
Q4WTN9	20850.9	Inosine triphosphate pyrophosphatase OS=Neosartorya fumigata (strain ATCC MYA-4609 / Af293 / CBS 101355 / FGSC A1100) OX=330879 GN=AFUA_5G05560 PE=3 SV=1		8.77148	2.18092		Cytoplasm
Q5B8K4	21363.1	Signal peptidase complex catalytic subunit sec11 OS=Emericella nidulans (strain FGSC A4 / ATCC 38163 / CBS 112.46 / NRRL 194 / M139) OX=227321 GN=sec11 PE=3 SV=2				2.127	Plasma membrane
A1CIM7	21554.3	Golgi apparatus membrane protein tvp23 OS=Aspergillus clavatus (strain ATCC 1007 / CBS 513.65 / DSM 816 / NCTC 3887 / NRRL 1) OX=344612 GN=tvp23 PE=3 SV=1			2.18305	2.46992	Plasma membrane
Q2U6N1;A2R091	21670.1	Nascent polypeptide-associated complex subunit beta OS=Aspergillus oryzae (strain ATCC 42149 / RIB 40) OX=510516 GN=egd1 PE=3 SV=1	2.99176			2.56774	Nucleus
A2R8S7	21737.6	3-hydroxyanthranilate 3_4-dioxygenase OS=Aspergillus niger (strain CBS 513.88 / FGSC A1513) OX=425011 GN=bna1 PE=3 SV=1			3.86094		Plasma membrane
Q6MY48	21780.1	60S ribosomal protein L17 OS=Neosartorya fumigata (strain ATCC MYA-4609 / Af293 / CBS 101355 / FGSC A1100) OX=330879 GN=rpl17 PE=3 SV=1		3.11484	2.69863		Mitochondria
Q0CX45	22958.3	Protein yae1 OS=Aspergillus terreus (strain NIH 2624 / FGSC A1156) OX=341663 GN=yae1 PE=3 SV=1			2.88737		Nucleus
Q92450	23390.5	Superoxide dismutase [Mn]_ mitochondrial OS=Neosartorya fumigata (strain ATCC MYA-4609 / Af293 / CBS 101355 / FGSC A1100) OX=330879 GN=sodB PE=1 SV=3			2.67179		Cytoplasm
Q4WDH3;A1DLW4	23554.6	Hsp70 nucleotide exchange factor fes1 OS=Neosartorya fumigata (strain ATCC MYA-4609 / Af293 / CBS 101355 / FGSC A1100) OX=330879 GN=fes1 PE=3 SV=1		2.78781			Nucleus
A2QFH1	23562.6	Riboflavin kinase OS=Aspergillus niger (strain CBS 513.88 / FGSC A1513) OX=425011 GN=fmn1 PE=3 SV=1				3.72279	Cytoplasm
Q12526	24244.3	Ras-like protein OS=Emericella nidulans (strain FGSC A4 / ATCC 38163 / CBS 112.46 / NRRL 194 / M139) OX=227321 GN=rasA PE=2 SV=2				2.77526	Nucleus
A1DMU2;Q4WMS0	24469.8	Protein fmp52-1_ mitochondrial OS=Neosartorya fischeri (strain ATCC 1020 / DSM 3700 / CBS 544.65 / FGSC A1164 / JCM 1740 / NRRL 181 / WB 181) OX=331117 GN=fmp521 PE=3 SV=1			2.75895		Cytoplasm
C8VQ71	24478.5	Scytalone dehydratase-like protein mdpB OS=Emericella nidulans (strain FGSC A4 / ATCC 38163 / CBS 112.46 / NRRL 194 / M139) OX=227321 GN=mdpB PE=3 SV=1				53.4567	Cytoplasm
Q5B5L5	24528.1	Endoplasmic reticulum vesicle protein 25 OS=Emericella nidulans (strain FGSC A4 / ATCC 38163 / CBS 112.46 / NRRL 194 / M139) OX=227321 GN=erv25 PE=3 SV=1		1.52338			Extracellular matrix
B8NM67	24626.7	Oxidase ustYa OS=Aspergillus flavus (strain ATCC 200026 / FGSC A1120 / NRRL 3357 / JCM 12722 / SRRC 167) OX=332952 GN=ustYa PE=1 SV=1				14.9879	Cytoplasm
Q0CXX1	24737.9	54S ribosomal protein L4_ mitochondrial OS=Aspergillus terreus (strain NIH 2624 / FGSC A1156) OX=341663 GN=mrpl4 PE=3 SV=1	1.81365				Mitochondria
Q9P8K9	25148.3	Woronin body major protein OS=Emericella nidulans (strain FGSC A4 / ATCC 38163 / CBS 112.46 / NRRL 194 / M139) OX=227321 GN=hex1 PE=2 SV=1			5.13626		Peroxisomes
Q875I9	25533.4	Endo-chitosanase OS=Neosartorya fumigata OX=746128 GN=csn PE=1 SV=1			2.76032		Extracellular matrix
A1D5E3	25659	Probable pectate lyase F OS=Neosartorya fischeri (strain ATCC 1020 / DSM 3700 / CBS 544.65 / FGSC A1164 / JCM 1740 / NRRL 181 / WB 181) OX=331117 GN=plyF PE=3 SV=1				5.85404	Extracellular matrix
Q0CS66	26290.2	Cytochrome P450 monooxygenase ataY OS=Aspergillus terreus (strain NIH 2624 / FGSC A1156) OX=341663 GN=ataY PE=3 SV=1			1.58739		Nucleus
A0A097ZPC9	26690.5	Short chain dehydrogenase andC OS=Emericella variicolor OX=1549217 GN=andC PE=3 SV=1				5.79824	Cytoplasm
Q2U3M5;Q9P961	26820.2	Endo-chitosanase OS=Aspergillus oryzae (strain ATCC 42149 / RIB 40) OX=510516 GN=csn PE=3 SV=1	2.14951	1.57757			Cytoplasm
Q4X1I8	26844.9	Mitochondrial import inner membrane translocase subunit tim21 OS=Neosartorya fumigata (strain ATCC MYA-4609 / Af293 / CBS 101355 / FGSC A1100) OX=330879 GN=tim21 PE=3 SV=1				3.84074	Mitochondria
Q5AV81	26971.6	Uncharacterized oxidoreductase AN7799 OS=Emericella nidulans (strain FGSC A4 / ATCC 38163 / CBS 112.46 / NRRL 194 / M139) OX=227321 GN=AN7799 PE=1 SV=2				3.15096	Mitochondria
A0A1R3RGK4	27390.9	Ochratoxin biosynthesis cluster transcription factor OS=Aspergillus carbonarius (strain ITEM 5010) OX=602072 GN=ASPCADRAFT_7821 PE=3 SV=1			19.1591		Nucleus
Q4WLD2	27782.1	Terpene cyclase pyr4 OS=Neosartorya fumigata (strain ATCC MYA-4609 / Af293 / CBS 101355 / FGSC A1100) OX=330879 GN=pyr4 PE=1 SV=1				2.45179	Plasma membrane
A2Q9M4;Q5B787	27790.7	Methylthioribulose-1-phosphate dehydratase OS=Aspergillus niger (strain CBS 513.88 / FGSC A1513) OX=425011 GN=mde1 PE=3 SV=1				24.7685	Cytoplasm
B8NX10;Q2TW49	27890.2	Probable pectate lyase E OS=Aspergillus flavus (strain ATCC 200026 / FGSC A1120 / NRRL 3357 / JCM 12722 / SRRC 167) OX=332952 GN=plyE PE=3 SV=1				3.62674	Extracellular matrix
Q5ATC7	28081.5	Pectate lyase H OS=Emericella nidulans (strain FGSC A4 / ATCC 38163 / CBS 112.46 / NRRL 194 / M139) OX=227321 GN=plyH PE=1 SV=1		4.84152			Extracellular matrix
A2QKG2	28320.3	Mitochondrial inner membrane protease atp23 OS=Aspergillus niger (strain CBS 513.88 / FGSC A1513) OX=425011 GN=atp23 PE=3 SV=1				4.57203	Nucleus
Q5AR48	28375.7	Short chain dehydrogenase asqE OS=Emericella nidulans (strain FGSC A4 / ATCC 38163 / CBS 112.46 / NRRL 194 / M139) OX=227321 GN=asqE PE=3 SV=1			3.05879		Mitochondria
Q5AVK6	28405.6	Nucleolar protein 16 OS=Emericella nidulans (strain FGSC A4 / ATCC 38163 / CBS 112.46 / NRRL 194 / M139) OX=227321 GN=nop16 PE=3 SV=1				8.26668	Nucleus
Q2UBH0	28694.9	Adenylate kinase OS=Aspergillus oryzae (strain ATCC 42149 / RIB 40) OX=510516 GN=adk1 PE=3 SV=2	5.78261				Cytoskeleton
Q4WV66	28803.1	U2 small nuclear ribonucleoprotein A' OS=Neosartorya fumigata (strain ATCC MYA-4609 / Af293 / CBS 101355 / FGSC A1100) OX=330879 GN=lea1 PE=3 SV=1			4.03639		Nucleus
Q5B2V8	28825.2	Adenylate kinase OS=Emericella nidulans (strain FGSC A4 / ATCC 38163 / CBS 112.46 / NRRL 194 / M139) OX=227321 GN=adk1 PE=3 SV=1		2.66649			Cytoplasm
A1CT75	29260.3	Mediator of RNA polymerase II transcription subunit 7 OS=Aspergillus clavatus (strain ATCC 1007 / CBS 513.65 / DSM 816 / NCTC 3887 / NRRL 1) OX=344612 GN=med7 PE=3 SV=1			8.45999		Nucleus
E9QUT3	29299.2	Hydroxynaphthalene reductase arp2 OS=Neosartorya fumigata (strain ATCC MYA-4609 / Af293 / CBS 101355 / FGSC A1100) OX=330879 GN=arp2 PE=3 SV=1			1.51272		Cytoplasm
Q5B423	29329.8	Pre-mRNA-splicing factor isy1 OS=Emericella nidulans (strain FGSC A4 / ATCC 38163 / CBS 112.46 / NRRL 194 / M139) OX=227321 GN=isy1 PE=3 SV=1			3.79088		Nucleus
Q2UPU5	29539	RNA polymerase II subunit A C-terminal domain phosphatase ssu72 OS=Aspergillus oryzae (strain ATCC 42149 / RIB 40) OX=510516 GN=ssu72 PE=3 SV=1	1.53896				Cytoplasm
Q2U3T8	30101.5	EKC/KEOPS complex subunit bud32 OS=Aspergillus oryzae (strain ATCC 42149 / RIB 40) OX=510516 GN=bud32 PE=3 SV=1			1.85707		Cytoplasm
Q0CLE8	30142.2	37S ribosomal protein S25_ mitochondrial OS=Aspergillus terreus (strain NIH 2624 / FGSC A1156) OX=341663 GN=rsm25 PE=3 SV=1			5.93048		Mitochondria
A1D9E6	30179.5	Chromosome segregation in meiosis protein 3 OS=Neosartorya fischeri (strain ATCC 1020 / DSM 3700 / CBS 544.65 / FGSC A1164 / JCM 1740 / NRRL 181 / WB 181) OX=331117 GN=csm3 PE=3 SV=1				3.28624	Nucleus
Q5BDI8	30209	Probable kinetochore protein spc25 OS=Emericella nidulans (strain FGSC A4 / ATCC 38163 / CBS 112.46 / NRRL 194 / M139) OX=227321 GN=spc25 PE=3 SV=1			2.1374		Nucleus
Q5B0M9	30263.6	DNA replication complex GINS protein psf2 OS=Emericella nidulans (strain FGSC A4 / ATCC 38163 / CBS 112.46 / NRRL 194 / M139) OX=227321 GN=psf2 PE=3 SV=2			1.78266		Cytoskeleton
Q5AZJ0	30344.4	Required for respiratory growth protein 9_ mitochondrial OS=Emericella nidulans (strain FGSC A4 / ATCC 38163 / CBS 112.46 / NRRL 194 / M139) OX=227321 GN=rrg9 PE=3 SV=1				4.32907	Mitochondria
O13410	30381.3	Orotidine 5'-phosphate decarboxylase OS=Neosartorya fumigata (strain ATCC MYA-4609 / Af293 / CBS 101355 / FGSC A1100) OX=330879 GN=pyrG PE=3 SV=1			2.72579		Mitochondria
A5AAL8	30574.8	37S ribosomal protein S25_ mitochondrial OS=Aspergillus niger (strain CBS 513.88 / FGSC A1513) OX=425011 GN=rsm25 PE=3 SV=1			7.88082		Mitochondria
P0C5H8	30581.9	Putative transcription factor kapC OS=Emericella nidulans (strain FGSC A4 / ATCC 38163 / CBS 112.46 / NRRL 194 / M139) OX=227321 GN=kapC PE=3 SV=1			2.88974	2.20892	Nucleus
Q0CXW9	30719.1	Acetylaranotin bis-thiomethyltransferase OS=Aspergillus terreus (strain NIH 2624 / FGSC A1156) OX=341663 GN=ataS PE=2 SV=1				10.2357	Cytoplasm
Q2UNX4	30882.2	Putative transcription factor kapC OS=Aspergillus oryzae (strain ATCC 42149 / RIB 40) OX=510516 GN=kapC PE=3 SV=2				9.71658	Nucleus
B8NM79	31133.8	Glutathione S-transferase-like protein ustS OS=Aspergillus flavus (strain ATCC 200026 / FGSC A1120 / NRRL 3357 / JCM 12722 / SRRC 167) OX=332952 GN=ustS PE=1 SV=2				2.87226	Cytoskeleton
A2QCC7	31224.9	54S ribosomal protein L4_ mitochondrial OS=Aspergillus niger (strain CBS 513.88 / FGSC A1513) OX=425011 GN=mrpl4 PE=3 SV=1			4.38727		Mitochondria
A2R156	31334.2	Protein pxr1 OS=Aspergillus niger (strain CBS 513.88 / FGSC A1513) OX=425011 GN=pxr1 PE=3 SV=1				4.13334	Nucleus
A0A144Y7G4	31522.2	Short chain dehydrogenase mpl6 OS=Monascus purpureus OX=5098 GN=mpl6 PE=1 SV=1				4.2887	Mitochondria
Q6MY91	31604.2	Diphthine methyl ester synthase OS=Neosartorya fumigata (strain ATCC MYA-4609 / Af293 / CBS 101355 / FGSC A1100) OX=330879 GN=dph5 PE=3 SV=1		1.53581	3.0169		Cytoskeleton
A2Q8K8	31814.3	Probable endonuclease lcl3 OS=Aspergillus niger (strain CBS 513.88 / FGSC A1513) OX=425011 GN=lcl3 PE=3 SV=1			3.36247		Plasma membrane
Q5BAB7	31863.4	EKC/KEOPS complex subunit bud32 OS=Emericella nidulans (strain FGSC A4 / ATCC 38163 / CBS 112.46 / NRRL 194 / M139) OX=227321 GN=bud32 PE=3 SV=1	3.05076				Mitochondria
P24817	32087.9	Ribosome-inactivating protein beta-momorcharin OS=Momordica charantia OX=3673 GN=MAP30 PE=1 SV=2			2.9585		Extracellular matrix
A1DGS2;B0XS28;Q4X1I3;A1C646;C8V330;Q2U002;A2R7Z2;Q0CPF9	32098.9	Eukaryotic translation initiation factor 3 subunit G OS=Neosartorya fischeri (strain ATCC 1020 / DSM 3700 / CBS 544.65 / FGSC A1164 / JCM 1740 / NRRL 181 / WB 181) OX=331117 GN=TIF35 PE=3 SV=1				690.92	Plasma membrane
B8NHF2;Q2UF33	32237.3	Required for respiratory growth protein 9_ mitochondrial OS=Aspergillus flavus (strain ATCC 200026 / FGSC A1120 / NRRL 3357 / JCM 12722 / SRRC 167) OX=332952 GN=rrg9 PE=3 SV=1				8.92587	Mitochondria
C8VE82	32267.2	Methyltransferase ausD OS=Emericella nidulans (strain FGSC A4 / ATCC 38163 / CBS 112.46 / NRRL 194 / M139) OX=227321 GN=ausD PE=3 SV=1			1.8981		Nucleus
B8NV05;Q2U523	32795.7	Ubiquinone biosynthesis protein coq4_ mitochondrial OS=Aspergillus flavus (strain ATCC 200026 / FGSC A1120 / NRRL 3357 / JCM 12722 / SRRC 167) OX=332952 GN=coq4 PE=3 SV=2		1.69368			Mitochondria
Q0CU52	32943	Protein pxr1 OS=Aspergillus terreus (strain NIH 2624 / FGSC A1156) OX=341663 GN=pxr1 PE=3 SV=2			2.44022		Nucleus
A2QCV4	33650.9	NADH-cytochrome b5 reductase 1 OS=Aspergillus niger (strain CBS 513.88 / FGSC A1513) OX=425011 GN=cbr1 PE=3 SV=1				3.18281	Plasma membrane
Q8LDW6	33937.3	Endonuclease 3 OS=Arabidopsis thaliana OX=3702 GN=ENDO3 PE=1 SV=1				28.7862	Peroxisomes
A1CYB8	33951.6	Probable pectate lyase A OS=Neosartorya fischeri (strain ATCC 1020 / DSM 3700 / CBS 544.65 / FGSC A1164 / JCM 1740 / NRRL 181 / WB 181) OX=331117 GN=plyA PE=3 SV=1			1.88012		Cytoplasm
Q2UA27	34030.5	Cytosolic Fe-S cluster assembly factor cfd1 OS=Aspergillus oryzae (strain ATCC 42149 / RIB 40) OX=510516 GN=cfd1 PE=3 SV=1				59.0991	Cytoplasm
A1CRW4	34043.8	Probable endonuclease lcl3 OS=Aspergillus clavatus (strain ATCC 1007 / CBS 513.65 / DSM 816 / NCTC 3887 / NRRL 1) OX=344612 GN=lcl3 PE=3 SV=1			2.84257		Cytoplasm
B8NM78	34083.5	Methyltransferase ustM OS=Aspergillus flavus (strain ATCC 200026 / FGSC A1120 / NRRL 3357 / JCM 12722 / SRRC 167) OX=332952 GN=ustM PE=1 SV=2		4.20603			Mitochondria
A1DC33	34204.6	Protein pxr1 OS=Neosartorya fischeri (strain ATCC 1020 / DSM 3700 / CBS 544.65 / FGSC A1164 / JCM 1740 / NRRL 181 / WB 181) OX=331117 GN=pxr1 PE=3 SV=1				8.98917	Nucleus
A2Q9E4	34223.2	tRNA (guanine-N(7)-)-methyltransferase OS=Aspergillus niger (strain CBS 513.88 / FGSC A1513) OX=425011 GN=trm8 PE=3 SV=1	4.47691		101.703		Nucleus
C8VI80	34275.1	Short-chain dehydrogenase/reductase pkfC OS=Emericella nidulans (strain FGSC A4 / ATCC 38163 / CBS 112.46 / NRRL 194 / M139) OX=227321 GN=pkfC PE=2 SV=1			1.74712		Cytoplasm
Q5B4J6	34311.8	rRNA-processing protein efg1 OS=Emericella nidulans (strain FGSC A4 / ATCC 38163 / CBS 112.46 / NRRL 194 / M139) OX=227321 GN=efg1 PE=3 SV=1			1.79407		Nucleus
A1CX14	34367.8	Probable endo-1_4-beta-xylanase C OS=Neosartorya fischeri (strain ATCC 1020 / DSM 3700 / CBS 544.65 / FGSC A1164 / JCM 1740 / NRRL 181 / WB 181) OX=331117 GN=xlnC PE=2 SV=1			2.02678		Cytoplasm
A2QV36;Q9C2Z0	34380.4	Probable pectate lyase A OS=Aspergillus niger (strain CBS 513.88 / FGSC A1513) OX=425011 GN=plyA PE=3 SV=1			3.27897		Cytoplasm
A1D4S1;B0XMZ5;Q4WK77	34390.3	Probable endonuclease lcl3 OS=Neosartorya fischeri (strain ATCC 1020 / DSM 3700 / CBS 544.65 / FGSC A1164 / JCM 1740 / NRRL 181 / WB 181) OX=331117 GN=lcl3 PE=3 SV=1		1.51203			Mitochondria
Q00511	34411.9	Uricase OS=Aspergillus flavus OX=5059 GN=uaZ PE=1 SV=3			2.09253		Peroxisomes
A1CH27	34423.4	Tethering factor for nuclear proteasome sts1 OS=Aspergillus clavatus (strain ATCC 1007 / CBS 513.65 / DSM 816 / NCTC 3887 / NRRL 1) OX=344612 GN=sts1 PE=3 SV=1		1.65168			Cytoplasm
A1DI57;Q4X022	34455.9	Mitochondrial thiamine pyrophosphate carrier 1 OS=Neosartorya fischeri (strain ATCC 1020 / DSM 3700 / CBS 544.65 / FGSC A1164 / JCM 1740 / NRRL 181 / WB 181) OX=331117 GN=tpc1 PE=3 SV=1			2.2507		Mitochondria
Q0CV29	34642.8	RNA polymerase II holoenzyme cyclin-like subunit OS=Aspergillus terreus (strain NIH 2624 / FGSC A1156) OX=341663 GN=ssn8 PE=3 SV=1		1.56648			Nucleus
Q5BA96	34830.1	Probable arabinan endo-1_5-alpha-L-arabinosidase A OS=Emericella nidulans (strain FGSC A4 / ATCC 38163 / CBS 112.46 / NRRL 194 / M139) OX=227321 GN=abnA PE=3 SV=2				3.73617	Extracellular matrix
A2QK82	34965.1	Probable pectinesterase A OS=Aspergillus niger (strain CBS 513.88 / FGSC A1513) OX=425011 GN=pmeA PE=3 SV=1		77.7632			Extracellular matrix
Q4WHF8	34978.8	RNA exonuclease 4 OS=Neosartorya fumigata (strain ATCC MYA-4609 / Af293 / CBS 101355 / FGSC A1100) OX=330879 GN=rex4 PE=3 SV=1	2.90369				Nucleus
Q5AYT1	35208.5	Mediator of RNA polymerase II transcription subunit 6 OS=Emericella nidulans (strain FGSC A4 / ATCC 38163 / CBS 112.46 / NRRL 194 / M139) OX=227321 GN=med6 PE=3 SV=2				4.14017	Nucleus
Q9UUZ9	35299.3	Thiamine thiazole synthase OS=Aspergillus oryzae (strain ATCC 42149 / RIB 40) OX=510516 GN=thiA PE=3 SV=2				7.57315	Cytoplasm
A2QX23;G3KLH5	35309.1	Lactamase-like protein adaB OS=Aspergillus niger (strain CBS 513.88 / FGSC A1513) OX=425011 GN=adaB PE=1 SV=1			3.72541		Cytoplasm
Q4W945	35517.3	Atrochrysone carboxyl ACP thioesterase OS=Neosartorya fumigata (strain ATCC MYA-4609 / Af293 / CBS 101355 / FGSC A1100) OX=330879 GN=encB PE=1 SV=1	3.90945				Cytoskeleton
P56859	35561.2	Phosphoadenosine phosphosulfate reductase OS=Emericella nidulans (strain FGSC A4 / ATCC 38163 / CBS 112.46 / NRRL 194 / M139) OX=227321 GN=sA PE=3 SV=3			1.63603		Nucleus
Q5AVW1;Q2UCW8	35562.1	Mitochondrial thiamine pyrophosphate carrier 1 OS=Emericella nidulans (strain FGSC A4 / ATCC 38163 / CBS 112.46 / NRRL 194 / M139) OX=227321 GN=tpc1 PE=3 SV=1		2.40813			Mitochondria
C5J411;A2QFV7;P33559	35590.2	Probable endo-1_4-beta-xylanase C OS=Aspergillus niger OX=5061 GN=xlnC PE=2 SV=2			2.56204		Extracellular matrix
Q0C9M9	35699.2	rRNA-processing protein efg1 OS=Aspergillus terreus (strain NIH 2624 / FGSC A1156) OX=341663 GN=efg1 PE=3 SV=1			9.68254		Nucleus
B0XNR0;Q4WJT9;A1D4E3	35714.8	Probable NAD(P)H-dependent D-xylose reductase xyl1 OS=Neosartorya fumigata (strain CEA10 / CBS 144.89 / FGSC A1163) OX=451804 GN=xyl1 PE=3 SV=1				4.08023	Cytoplasm
P0DOB3	35718.4	Probable decarboxylase gedI OS=Aspergillus terreus (strain NIH 2624 / FGSC A1156) OX=341663 GN=gedI PE=3 SV=1				4.05381	Cytoplasm
Q0CRD8	35948.2	NADH-cytochrome b5 reductase 2 OS=Aspergillus terreus (strain NIH 2624 / FGSC A1156) OX=341663 GN=mcr1 PE=3 SV=2				3.89314	Mitochondria
B8NLU5;Q2U616	36199.5	Basic leucine zipper (bZIP) transcription factor atfB OS=Aspergillus flavus (strain ATCC 200026 / FGSC A1120 / NRRL 3357 / JCM 12722 / SRRC 167) OX=332952 GN=atfB PE=1 SV=1	3.76386				Nucleus
Q4WJ01;B0XPZ1	36348.3	Extracellular metalloprotease AFUA_1G07730 OS=Neosartorya fumigata (strain ATCC MYA-4609 / Af293 / CBS 101355 / FGSC A1100) OX=330879 GN=AFUA_1G07730 PE=3 SV=2		1.70646			Extracellular matrix
P20445	36425.3	Glyceraldehyde-3-phosphate dehydrogenase OS=Emericella nidulans (strain FGSC A4 / ATCC 38163 / CBS 112.46 / NRRL 194 / M139) OX=227321 GN=gpdA PE=1 SV=2				1.70323	Cytoplasm
A1CYY6	36499.7	rRNA-processing protein efg1 OS=Neosartorya fischeri (strain ATCC 1020 / DSM 3700 / CBS 544.65 / FGSC A1164 / JCM 1740 / NRRL 181 / WB 181) OX=331117 GN=efg1 PE=3 SV=2				2.41266	Nucleus
Q4WHG5	36867.8	Deoxyhypusine hydroxylase OS=Neosartorya fumigata (strain ATCC MYA-4609 / Af293 / CBS 101355 / FGSC A1100) OX=330879 GN=lia1 PE=3 SV=2				98.8782	Nucleus
F2PWS8;F2S702	36871.2	Lactamase-like protein nscB OS=Trichophyton equinum (strain ATCC MYA-4606 / CBS 127.97) OX=559882 GN=nscB PE=3 SV=1		1.88268			Nucleus
A1CED0;A1DFW7;Q4WHG5	36901.6	Deoxyhypusine hydroxylase OS=Aspergillus clavatus (strain ATCC 1007 / CBS 513.65 / DSM 816 / NCTC 3887 / NRRL 1) OX=344612 GN=lia1 PE=3 SV=1	1.77401		6.25638		Cytoplasm
Q00646	37007.5	Cyclin-dependent kinase 1 OS=Emericella nidulans (strain FGSC A4 / ATCC 38163 / CBS 112.46 / NRRL 194 / M139) OX=227321 GN=nimX PE=2 SV=1			1.91169		Nucleus
A1C7T4	37077.2	Cytosolic Fe-S cluster assembly factor nbp35 OS=Aspergillus clavatus (strain ATCC 1007 / CBS 513.65 / DSM 816 / NCTC 3887 / NRRL 1) OX=344612 GN=nbp35 PE=3 SV=1				10.4573	Cytoplasm
Q2UU72	37134.8	tRNA (guanine-N(7)-)-methyltransferase OS=Aspergillus oryzae (strain ATCC 42149 / RIB 40) OX=510516 GN=trm8 PE=3 SV=1		2.10785		3.02229	Nucleus
Q5AVC5	37140.5	Pre-mRNA-splicing factor cwc24 OS=Emericella nidulans (strain FGSC A4 / ATCC 38163 / CBS 112.46 / NRRL 194 / M139) OX=227321 GN=cwc24 PE=3 SV=1		2.67838	2.04914		Nucleus
B8NWW2	37180.8	NmrA-like family domain-containing oxidoreductase lnbB OS=Aspergillus flavus (strain ATCC 200026 / FGSC A1120 / NRRL 3357 / JCM 12722 / SRRC 167) OX=332952 GN=lnaB PE=3 SV=1			1.99427		Mitochondria
Q2UNJ0	37389.5	Chitin synthase export chaperone OS=Aspergillus oryzae (strain ATCC 42149 / RIB 40) OX=510516 GN=chs7 PE=3 SV=1				2.2538	Extracellular matrix
Q4WZP2	37470.1	COP9 signalosome complex subunit 5 OS=Neosartorya fumigata (strain ATCC MYA-4609 / Af293 / CBS 101355 / FGSC A1100) OX=330879 GN=csn5 PE=3 SV=2			4.50647		Cytoskeleton
P08843	37552.4	Alcohol dehydrogenase 1 OS=Emericella nidulans (strain FGSC A4 / ATCC 38163 / CBS 112.46 / NRRL 194 / M139) OX=227321 GN=alcA PE=3 SV=2			4.81124		Cytoplasm
K0E3U5	37574.2	2-oxoglutarate-dependent dioxygenase ecdK OS=Aspergillus rugulosus OX=41736 GN=ecdK PE=1 SV=1		1.613			Nucleus
A5AAA1;B8N3P7;Q2UKT0;A1D6T7;B0XXL5;Q4WY07;Q5B971	37848.2	ATPase get3 OS=Aspergillus niger (strain CBS 513.88 / FGSC A1513) OX=425011 GN=get3 PE=3 SV=1	2.16997				Nucleus
A7XRY6	37848.6	Probable NADPH-dependent quinone reductase tdiC OS=Emericella nidulans (strain FGSC A4 / ATCC 38163 / CBS 112.46 / NRRL 194 / M139) OX=227321 GN=tdiC PE=2 SV=1				52.5309	Cytoplasm
Q4WUA0	37925.6	Pre-mRNA-splicing factor cwc24 OS=Neosartorya fumigata (strain ATCC MYA-4609 / Af293 / CBS 101355 / FGSC A1100) OX=330879 GN=cwc24 PE=3 SV=1			2.58347		Nucleus
Q4WMU1	37948.1	S-methyl-5'-thioadenosine phosphorylase OS=Neosartorya fumigata (strain ATCC MYA-4609 / Af293 / CBS 101355 / FGSC A1100) OX=330879 GN=AFUA_6G08720 PE=3 SV=1			1.63372		Mitochondria
B8N8M2;P41750;Q2UHL4	38254.4	Probable endopolygalacturonase I OS=Aspergillus flavus (strain ATCC 200026 / FGSC A1120 / NRRL 3357 / JCM 12722 / SRRC 167) OX=332952 GN=pgaI PE=3 SV=1		2.9161			Extracellular matrix
C5FM60;E4V2N5	38266.8	Lactamase-like protein nscB OS=Arthroderma otae (strain ATCC MYA-4605 / CBS 113480) OX=554155 GN=nscB PE=3 SV=1	4.19919				Nucleus
Q9P4W3;A2QCV8	38332.4	Endopolygalacturonase B OS=Aspergillus niger OX=5061 GN=pgaB PE=1 SV=1				5.61342	Extracellular matrix
B8MXJ7;Q2US83	38375.1	Probable endo-beta-1_4-glucanase D OS=Aspergillus flavus (strain ATCC 200026 / FGSC A1120 / NRRL 3357 / JCM 12722 / SRRC 167) OX=332952 GN=eglD PE=3 SV=1			5.35497		Extracellular matrix
B9WYE6	38869	Versiconal hemiacetal acetate reductase OS=Aspergillus parasiticus OX=5067 GN=vrdA PE=1 SV=1		1.68869			Cytoskeleton
Q4WF56	39076	Fusarinine C esterase sidJ OS=Neosartorya fumigata (strain ATCC MYA-4609 / Af293 / CBS 101355 / FGSC A1100) OX=330879 GN=sidJ PE=1 SV=1				2.85596	Mitochondria
Q5AYR9	39211.6	rRNA biogenesis protein rrp36 OS=Emericella nidulans (strain FGSC A4 / ATCC 38163 / CBS 112.46 / NRRL 194 / M139) OX=227321 GN=rrp36 PE=3 SV=1				3.08861	Nucleus
A1D3T4;B0XPR3;Q4WJ80	39323.6	Probable arabinogalactan endo-beta-1_4-galactanase A OS=Neosartorya fischeri (strain ATCC 1020 / DSM 3700 / CBS 544.65 / FGSC A1164 / JCM 1740 / NRRL 181 / WB 181) OX=331117 GN=galA PE=3 SV=1		1.81095			Extracellular matrix
Q09016	39372.8	Neutral protease 2 homolog mep20 OS=Neosartorya fumigata OX=746128 GN=mep20 PE=3 SV=1				12.0425	Extracellular matrix
C8VK14	39429.7	2-oxoglutarate-Fe(II) type oxidoreductase hxnY OS=Emericella nidulans (strain FGSC A4 / ATCC 38163 / CBS 112.46 / NRRL 194 / M139) OX=227321 GN=hxnY PE=2 SV=1			4.50817		Cytoplasm
B8NVB7;Q2TXS4	39571.9	Probable pectin lyase D OS=Aspergillus flavus (strain ATCC 200026 / FGSC A1120 / NRRL 3357 / JCM 12722 / SRRC 167) OX=332952 GN=pelD PE=3 SV=1				8.77226	Extracellular matrix
Q4WRE2	39637.8	SWR1-complex protein 5 OS=Neosartorya fumigata (strain ATCC MYA-4609 / Af293 / CBS 101355 / FGSC A1100) OX=330879 GN=swc5 PE=3 SV=1		4.39684			Nucleus
Q5AWB7	39733.7	Probable mannan endo-1_4-beta-mannosidase E OS=Emericella nidulans (strain FGSC A4 / ATCC 38163 / CBS 112.46 / NRRL 194 / M139) OX=227321 GN=manE PE=3 SV=1	4.29965			4.45222	Extracellular matrix
Q5AQJ1	39936.1	Probable pectin lyase D OS=Emericella nidulans (strain FGSC A4 / ATCC 38163 / CBS 112.46 / NRRL 194 / M139) OX=227321 GN=pelD PE=3 SV=1				21.0517	Peroxisomes
S3DB74	39973.7	3-isopropylmalate dehydrogenase gloI OS=Glarea lozoyensis (strain ATCC 20868 / MF5171) OX=1116229 GN=gloI PE=1 SV=1				46.5337	Cytoplasm
A1CAN8	40022.2	Autophagy-related protein 3 OS=Aspergillus clavatus (strain ATCC 1007 / CBS 513.65 / DSM 816 / NCTC 3887 / NRRL 1) OX=344612 GN=atg3 PE=3 SV=1			3.79464		Mitochondria
Q96V52	40113.7	Glutamine synthetase OS=Emericella nidulans (strain FGSC A4 / ATCC 38163 / CBS 112.46 / NRRL 194 / M139) OX=227321 GN=glnA PE=3 SV=3				6.46646	Cytoplasm
B0Y4I9;Q4WQB9	40118.3	tRNA (guanine-N(7)-)-methyltransferase OS=Neosartorya fumigata (strain CEA10 / CBS 144.89 / FGSC A1163) OX=451804 GN=trm8 PE=3 SV=1	3.42211	3.33067	4.67471		Nucleus
Q4WV10	40182.6	Probable pectin lyase A OS=Neosartorya fumigata (strain ATCC MYA-4609 / Af293 / CBS 101355 / FGSC A1100) OX=330879 GN=pelA PE=3 SV=1	3.94248		4.6854		Peroxisomes
B0YCZ3;Q4WDF7	40206.4	rRNA biogenesis protein rrp36 OS=Neosartorya fumigata (strain CEA10 / CBS 144.89 / FGSC A1163) OX=451804 GN=rrp36 PE=3 SV=1	1.83241				Nucleus
C8VTS4;B8MYL0	40211.1	Velvet complex subunit B OS=Emericella nidulans (strain FGSC A4 / ATCC 38163 / CBS 112.46 / NRRL 194 / M139) OX=227321 GN=velB PE=1 SV=1				4.7523	Nucleus
Q5BGU9	40641.4	N-acetyl-6-hydroxytryptophan oxidase ivoB OS=Emericella nidulans (strain FGSC A4 / ATCC 38163 / CBS 112.46 / NRRL 194 / M139) OX=227321 GN=ivoB PE=1 SV=1			2.62847		Extracellular matrix
P04963	40675.3	Chloroperoxidase OS=Leptoxyphium fumago OX=5474 GN=CPO PE=1 SV=3			1.52928		Extracellular matrix
C8VDI2	40830.2	Autophagy-related protein 3 OS=Emericella nidulans (strain FGSC A4 / ATCC 38163 / CBS 112.46 / NRRL 194 / M139) OX=227321 GN=atg3 PE=3 SV=1			1.95092	13.9181	Mitochondria
A1DIN9	41020	Pre-rRNA-processing protein esf2 OS=Neosartorya fischeri (strain ATCC 1020 / DSM 3700 / CBS 544.65 / FGSC A1164 / JCM 1740 / NRRL 181 / WB 181) OX=331117 GN=esf2 PE=3 SV=1			2.78883		Nucleus
Q9P959	41020.5	Alternative oxidase_ mitochondrial OS=Emericella nidulans (strain FGSC A4 / ATCC 38163 / CBS 112.46 / NRRL 194 / M139) OX=227321 GN=alxA PE=3 SV=2				1.7871	Mitochondria
Q0CSL5	41048.8	Altered inheritance of mitochondria protein 24_ mitochondrial OS=Aspergillus terreus (strain NIH 2624 / FGSC A1156) OX=341663 GN=aim24 PE=3 SV=1			39.645		Mitochondria
Q5B590	41073.5	Methylthioribose-1-phosphate isomerase OS=Emericella nidulans (strain FGSC A4 / ATCC 38163 / CBS 112.46 / NRRL 194 / M139) OX=227321 GN=mri1 PE=3 SV=1			4.27741	2.18315	Cytoplasm
Q5B4E7	41236.1	Peptidyl-prolyl cis-trans isomerase D OS=Emericella nidulans (strain FGSC A4 / ATCC 38163 / CBS 112.46 / NRRL 194 / M139) OX=227321 GN=cpr6 PE=3 SV=1		1.64143			Cytoplasm
Q8X1T6	41381.9	Adenine deaminase OS=Emericella nidulans (strain FGSC A4 / ATCC 38163 / CBS 112.46 / NRRL 194 / M139) OX=227321 GN=aah1 PE=1 SV=1	1.87299				Cytoplasm
Q0CJ58	41399.6	Terreic acid biosynthesis cluster protein D OS=Aspergillus terreus (strain NIH 2624 / FGSC A1156) OX=341663 GN=atD PE=1 SV=1				37.9991	Mitochondria
A1CLZ1	41626.6	Diels-Alderase ccsF OS=Aspergillus clavatus (strain ATCC 1007 / CBS 513.65 / DSM 816 / NCTC 3887 / NRRL 1) OX=344612 GN=ccsF PE=3 SV=1				13.7722	Cytoskeleton
B8NTZ8	41656.8	NADP-dependent oxidoreductase lnaE OS=Aspergillus flavus (strain ATCC 200026 / FGSC A1120 / NRRL 3357 / JCM 12722 / SRRC 167) OX=332952 GN=lnaE PE=3 SV=1			3.42312	8.23546	Nucleus
B8NI23	41691.3	N-methyltransferase imqF OS=Aspergillus flavus (strain ATCC 200026 / FGSC A1120 / NRRL 3357 / JCM 12722 / SRRC 167) OX=332952 GN=imqF PE=2 SV=1	6.87315			3.54214	Nucleus
P0CL53	41723.4	S-(hydroxymethyl)glutathione dehydrogenase OS=Aspergillus oryzae (strain ATCC 42149 / RIB 40) OX=510516 GN=FDH1 PE=3 SV=1	3.76422				Cytoplasm
A1D8Y6	41897.6	Probable mannan endo-1_4-beta-mannosidase A OS=Neosartorya fischeri (strain ATCC 1020 / DSM 3700 / CBS 544.65 / FGSC A1164 / JCM 1740 / NRRL 181 / WB 181) OX=331117 GN=manA PE=3 SV=1			3.06529		Extracellular matrix
A1CBI6	42173.8	Cytoplasmic tRNA 2-thiolation protein 2 OS=Aspergillus clavatus (strain ATCC 1007 / CBS 513.65 / DSM 816 / NCTC 3887 / NRRL 1) OX=344612 GN=ncs2 PE=3 SV=1			2.11458		Cytoskeleton
A1CMA3	42376.8	rRNA biogenesis protein rrp36 OS=Aspergillus clavatus (strain ATCC 1007 / CBS 513.65 / DSM 816 / NCTC 3887 / NRRL 1) OX=344612 GN=rrp36 PE=3 SV=1			2.5436		Nucleus
Q5AX35	42423.4	Pre-mRNA-splicing factor slt11 OS=Emericella nidulans (strain FGSC A4 / ATCC 38163 / CBS 112.46 / NRRL 194 / M139) OX=227321 GN=slt11 PE=3 SV=2		3.56841			Cytoplasm
Q4WZ70	42471.2	Chanoclavine-I aldehyde reductase easA OS=Neosartorya fumigata (strain ATCC MYA-4609 / Af293 / CBS 101355 / FGSC A1100) OX=330879 GN=easA PE=1 SV=1	3.20045				Mitochondria
Q5AQJ2	42489.8	Leucine carboxyl methyltransferase 1 OS=Emericella nidulans (strain FGSC A4 / ATCC 38163 / CBS 112.46 / NRRL 194 / M139) OX=227321 GN=ppm1 PE=3 SV=2		1.63638	2.09603		Cytoplasm
A1C6B4	42775.5	Mannitol-1-phosphate 5-dehydrogenase OS=Aspergillus clavatus (strain ATCC 1007 / CBS 513.65 / DSM 816 / NCTC 3887 / NRRL 1) OX=344612 GN=mpdA PE=3 SV=1		1.66875			Cytoplasm
A2R4K5	42786.8	rRNA biogenesis protein rrp36 OS=Aspergillus niger (strain CBS 513.88 / FGSC A1513) OX=425011 GN=rrp36 PE=3 SV=1				2.68732	Nucleus
A1C948	42846.3	Leucine aminopeptidase 1 OS=Aspergillus clavatus (strain ATCC 1007 / CBS 513.65 / DSM 816 / NCTC 3887 / NRRL 1) OX=344612 GN=lap1 PE=3 SV=1	1.6698				Extracellular matrix
M1W0Y0;Q6ZXC1	42961.3	Probable inactive dehydrogenase easA OS=Claviceps purpurea (strain 20.1) OX=1111077 GN=easA PE=3 SV=1			5.05978		Mitochondria
C8V3W6	42973.2	Probable assembly chaperone of rpl4 OS=Emericella nidulans (strain FGSC A4 / ATCC 38163 / CBS 112.46 / NRRL 194 / M139) OX=227321 GN=AN10433 PE=3 SV=1		4.03884			Nucleus
Q5B0F5	43272.9	Mannitol-1-phosphate 5-dehydrogenase OS=Emericella nidulans (strain FGSC A4 / ATCC 38163 / CBS 112.46 / NRRL 194 / M139) OX=227321 GN=mpdA PE=3 SV=1			2.99546	5.92745	Cytoplasm
B8NYX1;Q2PIT3	43318.8	Leucine aminopeptidase 1 OS=Aspergillus flavus (strain ATCC 200026 / FGSC A1120 / NRRL 3357 / JCM 12722 / SRRC 167) OX=332952 GN=lap1 PE=3 SV=1				3.43764	Extracellular matrix
Q9P900	43331.8	Demethylsterigmatocystin 6-O-methyltransferase OS=Aspergillus flavus (strain ATCC 200026 / FGSC A1120 / NRRL 3357 / JCM 12722 / SRRC 167) OX=332952 GN=omtB PE=3 SV=1			1.79214		Cytoskeleton
Q5AR47	43359.7	O-methyltransferase asqD OS=Emericella nidulans (strain FGSC A4 / ATCC 38163 / CBS 112.46 / NRRL 194 / M139) OX=227321 GN=asqD PE=3 SV=1			2.94904		Peroxisomes
Q5AXE5	43395.9	Leucine aminopeptidase 1 OS=Emericella nidulans (strain FGSC A4 / ATCC 38163 / CBS 112.46 / NRRL 194 / M139) OX=227321 GN=lap1 PE=3 SV=1			1.76754		Extracellular matrix
Q9P419	43467.9	Mitogen-activated protein kinase hog1 OS=Emericella nidulans (strain FGSC A4 / ATCC 38163 / CBS 112.46 / NRRL 194 / M139) OX=227321 GN=hog1 PE=1 SV=1			9.94955		Nucleus
G3XRG4	43646.7	Secondary metabolism regulator laeA OS=Aspergillus niger (strain ATCC 1015 / CBS 113.46 / FGSC A1144 / LSHB Ac4 / NCTC 3858a / NRRL 328 / USDA 3528.7) OX=380704 GN=laeA PE=3 SV=1				4.85661	Nucleus
A2R2G1	43648.9	Leucine aminopeptidase 1 OS=Aspergillus niger (strain CBS 513.88 / FGSC A1513) OX=425011 GN=lap1 PE=3 SV=1				4.14229	Extracellular matrix
Q4WQZ3	43909.3	Trypacidin cluster transcription factor OS=Neosartorya fumigata (strain ATCC MYA-4609 / Af293 / CBS 101355 / FGSC A1100) OX=330879 GN=tpcE PE=2 SV=2				2.02028	Mitochondria
Q5B833	44010.3	Mannan endo-1_4-beta-mannosidase B OS=Emericella nidulans (strain FGSC A4 / ATCC 38163 / CBS 112.46 / NRRL 194 / M139) OX=227321 GN=manB PE=1 SV=2			4.41885		Extracellular matrix
A1CE98	44272.2	WD repeat-containing protein jip5 OS=Aspergillus clavatus (strain ATCC 1007 / CBS 513.65 / DSM 816 / NCTC 3887 / NRRL 1) OX=344612 GN=jip5 PE=3 SV=1				6.58041	Nucleus
Q9C196	44522.5	cAMP-dependent protein kinase regulatory subunit OS=Aspergillus niger OX=5061 GN=pkaR PE=3 SV=1			1.92872		Cytoplasm
Q0CRF8	44680.2	WD repeat-containing protein jip5 OS=Aspergillus terreus (strain NIH 2624 / FGSC A1156) OX=341663 GN=jip5 PE=3 SV=1		2.59823			Nucleus
O59922	44903.8	cAMP-dependent protein kinase regulatory subunit OS=Emericella nidulans (strain FGSC A4 / ATCC 38163 / CBS 112.46 / NRRL 194 / M139) OX=227321 GN=pkaR PE=3 SV=1				2.43451	Cytoplasm
P11977	44966.5	Phosphoglycerate kinase OS=Emericella nidulans (strain FGSC A4 / ATCC 38163 / CBS 112.46 / NRRL 194 / M139) OX=227321 GN=pgkA PE=3 SV=2				8.57073	Cytoplasm
Q0CE14	44993.3	Structure-specific endonuclease subunit slx1 OS=Aspergillus terreus (strain NIH 2624 / FGSC A1156) OX=341663 GN=slx1 PE=3 SV=1				1.83598	Nucleus
A1D8J0;Q4WA60	44998.8	FAD-dependent monooxygenase nscC OS=Neosartorya fischeri (strain ATCC 1020 / DSM 3700 / CBS 544.65 / FGSC A1164 / JCM 1740 / NRRL 181 / WB 181) OX=331117 GN=nscC PE=3 SV=1		1.79688			Extracellular matrix
A1DJ47	45106.5	Probable glucan endo-1_3-beta-glucosidase eglC OS=Neosartorya fischeri (strain ATCC 1020 / DSM 3700 / CBS 544.65 / FGSC A1164 / JCM 1740 / NRRL 181 / WB 181) OX=331117 GN=eglC PE=3 SV=1		1.69235			Extracellular matrix
A2QEN5	45132.7	ATP-dependent RNA helicase eIF4A OS=Aspergillus niger (strain CBS 513.88 / FGSC A1513) OX=425011 GN=tif1 PE=3 SV=1				5.3411	Nucleus
B0XXF8;Q4WG16;A1DJ47;A1CD22	45228.6	Probable glucan endo-1_3-beta-glucosidase eglC OS=Neosartorya fumigata (strain CEA10 / CBS 144.89 / FGSC A1163) OX=451804 GN=eglC PE=3 SV=1				5.35223	Extracellular matrix
Q0C9L8	45252.7	ATP synthase subunit beta_ mitochondrial OS=Aspergillus terreus (strain NIH 2624 / FGSC A1156) OX=341663 GN=ctvE PE=3 SV=2			1.9409		Mitochondria
Q2U6D5	45268.3	Autophagy-related protein 18 OS=Aspergillus oryzae (strain ATCC 42149 / RIB 40) OX=510516 GN=atg18 PE=3 SV=1		11.7011			Extracellular matrix
Q4WZB3	45559.4	Heptaketide hydrolyase ayg1 OS=Neosartorya fumigata (strain ATCC MYA-4609 / Af293 / CBS 101355 / FGSC A1100) OX=330879 GN=ayg1 PE=1 SV=1			1.56696		Mitochondria
Q5AQE4	45574.5	Lipoyl synthase_ mitochondrial OS=Emericella nidulans (strain FGSC A4 / ATCC 38163 / CBS 112.46 / NRRL 194 / M139) OX=227321 GN=AN9486 PE=3 SV=1				2.36762	Mitochondria
Q5B7L0	45721.2	Cysteine protease atg4 OS=Emericella nidulans (strain FGSC A4 / ATCC 38163 / CBS 112.46 / NRRL 194 / M139) OX=227321 GN=atg4 PE=3 SV=2			2.43335		Nucleus
A2QX24	45774.8	FAD-dependent monooxygenase adaC OS=Aspergillus niger (strain CBS 513.88 / FGSC A1513) OX=425011 GN=adaC PE=1 SV=1				9.93929	Extracellular matrix
Q5AR53	45794.2	Iron/alpha-ketoglutarate-dependent dioxygenase asqJ OS=Emericella nidulans (strain FGSC A4 / ATCC 38163 / CBS 112.46 / NRRL 194 / M139) OX=227321 GN=asqJ PE=1 SV=1		1.81972			Nucleus
D4AWH1;D4CZZ4	45813.5	FAD-dependent monooxygenase nscC OS=Arthroderma benhamiae (strain ATCC MYA-4681 / CBS 112371) OX=663331 GN=nscC PE=3 SV=1			1.7282		Extracellular matrix
Q4WHU1	45819.6	Probable 4-hydroxyphenylpyruvate dioxygenase 1 OS=Neosartorya fumigata (strain ATCC MYA-4609 / Af293 / CBS 101355 / FGSC A1100) OX=330879 GN=AFUA_2G04200 PE=3 SV=1		2.5453	1.64303		Cytoplasm
P0CU78	45876.5	Transcriptional regulator alnR OS=Emericella nidulans (strain FGSC A4 / ATCC 38163 / CBS 112.46 / NRRL 194 / M139) OX=227321 GN=alnR PE=3 SV=1				1.80256	Nucleus
Q0C8J3	45882.3	Probable mannan endo-1_4-beta-mannosidase C OS=Aspergillus terreus (strain NIH 2624 / FGSC A1156) OX=341663 GN=manC PE=3 SV=1		1.50656			Extracellular matrix
A1CRV0	45893	Probable glucan 1_3-beta-glucosidase A OS=Aspergillus clavatus (strain ATCC 1007 / CBS 513.65 / DSM 816 / NCTC 3887 / NRRL 1) OX=344612 GN=exgA PE=3 SV=2			3.79825		Extracellular matrix
Q2U5B0	45911.4	Probable cysteine protease atg4 OS=Aspergillus oryzae (strain ATCC 42149 / RIB 40) OX=510516 GN=atg4 PE=3 SV=2	1.98286				Nucleus
A5ABM5	45997	Lipoyl synthase_ mitochondrial OS=Aspergillus niger (strain CBS 513.88 / FGSC A1513) OX=425011 GN=An11g09760 PE=3 SV=1			3.39073		Mitochondria
B0XSK6;Q4X0Z3	46039.9	Probable DNA-binding protein creA OS=Neosartorya fumigata (strain CEA10 / CBS 144.89 / FGSC A1163) OX=451804 GN=creA PE=3 SV=1	3.17434	3.56859			Nucleus
Q5BD67	46144	Cysteine synthase 2 OS=Emericella nidulans (strain FGSC A4 / ATCC 38163 / CBS 112.46 / NRRL 194 / M139) OX=227321 GN=cysF PE=3 SV=1				3.63867	Cytoplasm
A1D855;B0XYY2;Q4WWP1	46154.3	Lipoyl synthase_ mitochondrial OS=Neosartorya fischeri (strain ATCC 1020 / DSM 3700 / CBS 544.65 / FGSC A1164 / JCM 1740 / NRRL 181 / WB 181) OX=331117 GN=NFIA_070700 PE=3 SV=1				222.617	Mitochondria
A2QY50	46160.7	Probable cysteine protease atg4 OS=Aspergillus niger (strain CBS 513.88 / FGSC A1513) OX=425011 GN=atg4 PE=3 SV=1		2.25653			Nucleus
Q2UPB9	46502.8	Probable aminotransferase aclI OS=Aspergillus oryzae (strain ATCC 42149 / RIB 40) OX=510516 GN=aclI PE=3 SV=1			3.25488		Mitochondria
A1D2B8	46514.8	Actin cytoskeleton-regulatory complex protein end3 OS=Neosartorya fischeri (strain ATCC 1020 / DSM 3700 / CBS 544.65 / FGSC A1164 / JCM 1740 / NRRL 181 / WB 181) OX=331117 GN=end3 PE=3 SV=1				5.0064	Nucleus
A2QB52;B8MZA3;Q2UQQ2	46636.9	Adenylosuccinate synthetase OS=Aspergillus niger (strain CBS 513.88 / FGSC A1513) OX=425011 GN=An01g13920 PE=3 SV=1			3.94061		Cytoplasm
Q2UN81	46659.7	Metacaspase-1A OS=Aspergillus oryzae (strain ATCC 42149 / RIB 40) OX=510516 GN=casA PE=3 SV=2		1.655			Nucleus
Q4WLW7	46777.8	FAD-dependent monooxygenase fmqB OS=Neosartorya fumigata (strain ATCC MYA-4609 / Af293 / CBS 101355 / FGSC A1100) OX=330879 GN=fmqB PE=1 SV=1		6.54886	3.59163		Cytoplasm
Q5AS80	46881.6	Protein fyv10 OS=Emericella nidulans (strain FGSC A4 / ATCC 38163 / CBS 112.46 / NRRL 194 / M139) OX=227321 GN=fyv10 PE=3 SV=2			1.58809	1.69818	Nucleus
Q2TZQ9;B8NBJ4	46899.5	Probable glucan endo-1_6-beta-glucosidase B OS=Aspergillus oryzae (strain ATCC 42149 / RIB 40) OX=510516 GN=exgB PE=3 SV=1			1.89728		Extracellular matrix
A2QK65	46922.6	O-methyltransferase kntB OS=Aspergillus niger (strain CBS 513.88 / FGSC A1513) OX=425011 GN=ktnB PE=3 SV=1		1.69633			Nucleus
Q00771	47032.3	Calcium/calmodulin-dependent protein kinase cmkA OS=Emericella nidulans (strain FGSC A4 / ATCC 38163 / CBS 112.46 / NRRL 194 / M139) OX=227321 GN=cmkA PE=1 SV=2				4.21405	Cytoplasm
Q00770	47148.4	Fumarylacetoacetase OS=Emericella nidulans (strain FGSC A4 / ATCC 38163 / CBS 112.46 / NRRL 194 / M139) OX=227321 GN=fahA PE=1 SV=3				4.24386	Cytoplasm
Q5BH53	47162.4	Autophagy-related protein 18 OS=Emericella nidulans (strain FGSC A4 / ATCC 38163 / CBS 112.46 / NRRL 194 / M139) OX=227321 GN=atg18 PE=3 SV=2			7.19593		Extracellular matrix
Q0CT01	47162.8	Golgi apparatus membrane protein tvp38 OS=Aspergillus terreus (strain NIH 2624 / FGSC A1156) OX=341663 GN=tvp38 PE=3 SV=1				3.62006	Plasma membrane
A2QHX0	47249.4	Methionine aminopeptidase 2-2 OS=Aspergillus niger (strain CBS 513.88 / FGSC A1513) OX=425011 GN=An04g01330 PE=3 SV=1		3.6138			Cytoplasm
Q2UCL6	47290.6	Serine/threonine-protein phosphatase 2A activator 2 OS=Aspergillus oryzae (strain ATCC 42149 / RIB 40) OX=510516 GN=rrd2 PE=3 SV=1				5.54717	Nucleus
Q96X46;Q12560	47332.5	Enolase OS=Penicillium citrinum OX=5077 GN=enoA PE=1 SV=3	2.41988				Cytoplasm
Q4WTQ4	47387.1	Protein fyv10 OS=Neosartorya fumigata (strain ATCC MYA-4609 / Af293 / CBS 101355 / FGSC A1100) OX=330879 GN=fyv10 PE=3 SV=2				3.85991	Cytoplasm
Q96X30	47419.5	Enolase OS=Neosartorya fumigata (strain ATCC MYA-4609 / Af293 / CBS 101355 / FGSC A1100) OX=330879 GN=enoA PE=1 SV=3				1.81622	Cytoplasm
A0A0F0I5G4	47438.8	C2H2 type master regulator of conidiophore development brlA OS=Aspergillus parasiticus (strain ATCC 56775 / NRRL 5862 / SRRC 143 / SU-1) OX=1403190 GN=brlA PE=2 SV=1				2.43599	Nucleus
Q2UPY3	47583.5	ATP-dependent RNA helicase eIF4A OS=Aspergillus oryzae (strain ATCC 42149 / RIB 40) OX=510516 GN=tif1 PE=3 SV=1		2.63918			Nucleus
B8MZJ8;Q2UQG9	47757.3	Mitochondrial distribution and morphology protein 12 OS=Aspergillus flavus (strain ATCC 200026 / FGSC A1120 / NRRL 3357 / JCM 12722 / SRRC 167) OX=332952 GN=mdm12 PE=3 SV=1		6.06398			Nucleus
Q5BC23	47800.4	Palmitoyltransferase swf1 OS=Emericella nidulans (strain FGSC A4 / ATCC 38163 / CBS 112.46 / NRRL 194 / M139) OX=227321 GN=swf1 PE=3 SV=1				34.0979	Plasma membrane
Q4WDA4	47852	Cell division cycle protein 123 OS=Neosartorya fumigata (strain ATCC MYA-4609 / Af293 / CBS 101355 / FGSC A1100) OX=330879 GN=cdc123 PE=3 SV=1				4.42461	Nucleus
B8MZZ6;Q2UQ40	48082.4	Probable exopolygalacturonase C OS=Aspergillus flavus (strain ATCC 200026 / FGSC A1120 / NRRL 3357 / JCM 12722 / SRRC 167) OX=332952 GN=pgxC PE=3 SV=1		1.88527			Extracellular matrix
Q5BH32	48107	Monodictyphenone cluster transcription factor OS=Emericella nidulans (strain FGSC A4 / ATCC 38163 / CBS 112.46 / NRRL 194 / M139) OX=227321 GN=mdpE PE=3 SV=1		2.81693			Nucleus
Q4WMJ9	48616.2	Probable aminotransferase gliI OS=Neosartorya fumigata (strain ATCC MYA-4609 / Af293 / CBS 101355 / FGSC A1100) OX=330879 GN=gliI PE=2 SV=1		2.60695			Mitochondria
A2RA56	48839.1	ASTRA-associated protein 1 OS=Aspergillus niger (strain CBS 513.88 / FGSC A1513) OX=425011 GN=asa1 PE=3 SV=1				1.7502	Mitochondria
Q4WLC8	48890.2	Acetyltransferase pyr8 OS=Neosartorya fumigata (strain ATCC MYA-4609 / Af293 / CBS 101355 / FGSC A1100) OX=330879 GN=pyr8 PE=1 SV=1		1.74554		11.9008	Plasma membrane
A1CF18	48945.5	Nuclear distribution protein nudF 2 OS=Aspergillus clavatus (strain ATCC 1007 / CBS 513.65 / DSM 816 / NCTC 3887 / NRRL 1) OX=344612 GN=nudF-2 PE=3 SV=1	1.79768		2.29992		Cytoplasm
A2R472	48948.8	Putative transferase caf17_ mitochondrial OS=Aspergillus niger (strain CBS 513.88 / FGSC A1513) OX=425011 GN=caf17 PE=3 SV=1		1.53982			Mitochondria
B8N306;Q2UJ97	49006.1	Probable alpha-galactosidase B OS=Aspergillus flavus (strain ATCC 200026 / FGSC A1120 / NRRL 3357 / JCM 12722 / SRRC 167) OX=332952 GN=aglB PE=3 SV=1	2.24266				Extracellular matrix
A1CLZ0	49022.7	Hydrolyase ccsE OS=Aspergillus clavatus (strain ATCC 1007 / CBS 513.65 / DSM 816 / NCTC 3887 / NRRL 1) OX=344612 GN=ccsE PE=3 SV=1			5.90968		Mitochondria
C8VC05	49036.7	Endonuclease III homolog OS=Emericella nidulans (strain FGSC A4 / ATCC 38163 / CBS 112.46 / NRRL 194 / M139) OX=227321 GN=nth1 PE=3 SV=2				2.44827	Mitochondria
Q4WEI5	49065.4	Histone acetyltransferase type B subunit 2 OS=Neosartorya fumigata (strain ATCC MYA-4609 / Af293 / CBS 101355 / FGSC A1100) OX=330879 GN=hat2 PE=3 SV=1			2.04009		Cytoplasm
Q5AVF8	49077.6	Arginine biosynthesis bifunctional protein ArgJ_ mitochondrial OS=Emericella nidulans (strain FGSC A4 / ATCC 38163 / CBS 112.46 / NRRL 194 / M139) OX=227321 GN=ornA PE=3 SV=2	3.16699				Mitochondria
C8VEJ5	49085.7	Tryptophan dimethylallyltransferase nptA OS=Emericella nidulans (strain FGSC A4 / ATCC 38163 / CBS 112.46 / NRRL 194 / M139) OX=227321 GN=nptA PE=3 SV=1			1.74233		Cytoplasm
A1DN10	49095.8	Indole diterpene prenyltransferase anaPT OS=Neosartorya fischeri (strain ATCC 1020 / DSM 3700 / CBS 544.65 / FGSC A1164 / JCM 1740 / NRRL 181 / WB 181) OX=331117 GN=anaPT PE=1 SV=1		1.99223			Cytoplasm
Q2UKX3	49105.7	ATP-dependent RNA helicase dbp8 OS=Aspergillus oryzae (strain ATCC 42149 / RIB 40) OX=510516 GN=dbp8 PE=3 SV=1			7.37626		Nucleus
Q5B4X6	49125.8	Methionine aminopeptidase 2-1 OS=Emericella nidulans (strain FGSC A4 / ATCC 38163 / CBS 112.46 / NRRL 194 / M139) OX=227321 GN=AN4404 PE=3 SV=1			4.18877		Cytoplasm
B0Y793;Q4WNA2	49161.7	Probable 1_4-beta-D-glucan cellobiohydrolase A OS=Neosartorya fumigata (strain CEA10 / CBS 144.89 / FGSC A1163) OX=451804 GN=cbhA PE=3 SV=1			10.8856	10.6812	Extracellular matrix
Q4WQ82;Q5B7U0	49208.3	Mitochondrial import inner membrane translocase subunit tim54 OS=Neosartorya fumigata (strain ATCC MYA-4609 / Af293 / CBS 101355 / FGSC A1100) OX=330879 GN=tim54 PE=3 SV=1		1.53929			Mitochondria
A1DA84	49226.2	Methionine aminopeptidase 2-3 OS=Neosartorya fischeri (strain ATCC 1020 / DSM 3700 / CBS 544.65 / FGSC A1164 / JCM 1740 / NRRL 181 / WB 181) OX=331117 GN=NFIA_093940 PE=3 SV=1				3.24897	Cytoplasm
C9K203	49235.3	Putative methyltransferase cpaM OS=Aspergillus oryzae OX=5062 GN=cpaM PE=3 SV=1		1.62064			Cytoskeleton
Q5B7I6	49239.3	Esterase inpF OS=Emericella nidulans (strain FGSC A4 / ATCC 38163 / CBS 112.46 / NRRL 194 / M139) OX=227321 GN=inpF PE=3 SV=1				12.3535	Nucleus
A1CE97	49240.7	Probable 1_4-beta-D-glucan cellobiohydrolase A OS=Aspergillus clavatus (strain ATCC 1007 / CBS 513.65 / DSM 816 / NCTC 3887 / NRRL 1) OX=344612 GN=cbhA PE=3 SV=1			2.5301		Extracellur region
Q9UVS9;A2QPG2	49285	1_4-beta-D-glucan cellobiohydrolase A OS=Aspergillus niger OX=5061 GN=cbhA PE=2 SV=1	3.35754				Extracellur region
B0Y2U0;Q4WEL6	49364.8	Structure-specific endonuclease subunit slx1 OS=Neosartorya fumigata (strain CEA10 / CBS 144.89 / FGSC A1163) OX=451804 GN=slx1 PE=3 SV=1				2.9714	Nucleus
B8MWR8;Q2UPI0	49370.7	Probable cytosolic iron-sulfur protein assembly protein 1 OS=Aspergillus flavus (strain ATCC 200026 / FGSC A1120 / NRRL 3357 / JCM 12722 / SRRC 167) OX=332952 GN=cia1 PE=3 SV=1		1.63433			Cytosol
Q5B7W0	49455	GPI mannosyltransferase 1 OS=Emericella nidulans (strain FGSC A4 / ATCC 38163 / CBS 112.46 / NRRL 194 / M139) OX=227321 GN=gpi14 PE=3 SV=1				5.79218	Endoplasmic reticulum
Q2U913	49459.8	Carbamoyl-phosphate synthase arginine-specific small chain OS=Aspergillus oryzae (strain ATCC 42149 / RIB 40) OX=510516 GN=cpa1 PE=3 SV=1	1.92931		2.92613		Cytoplasm
Q2UA18	49460.3	Phosphatidylinositol transfer protein sfh5 OS=Aspergillus oryzae (strain ATCC 42149 / RIB 40) OX=510516 GN=sfh5 PE=3 SV=1		2.0639			Cytoplasm
E4V2N3	49465.3	Prenyltransferase nscD OS=Arthroderma gypseum (strain ATCC MYA-4604 / CBS 118893) OX=535722 GN=nscD PE=3 SV=1	4.05049				Cytoskliton
Q0C838	49469.3	Methionine aminopeptidase 2-1 OS=Aspergillus terreus (strain NIH 2624 / FGSC A1156) OX=341663 GN=ATEG_10146 PE=3 SV=1	2.6656	1.72324			Cytooplasm
F5HN73	49527.8	O-dimethylallyltransferase cpaD OS=Aspergillus oryzae OX=5062 GN=cpaD PE=1 SV=1				74.017	Mitochondria
Q4WU09	49679	Carbamoyl-phosphate synthase arginine-specific small chain OS=Neosartorya fumigata (strain ATCC MYA-4609 / Af293 / CBS 101355 / FGSC A1100) OX=330879 GN=cpa1 PE=3 SV=1			5.97856		Cytoplasm
Q4X0S7	49699.9	2-(3-amino-3-carboxypropyl)histidine synthase subunit 1 OS=Neosartorya fumigata (strain ATCC MYA-4609 / Af293 / CBS 101355 / FGSC A1100) OX=330879 GN=dph1 PE=3 SV=1	9.18974				Cytoplasm
Q0CJH2;Q8J0L4	49704.6	Mitochondrial distribution and morphology protein 10 OS=Aspergillus terreus (strain NIH 2624 / FGSC A1156) OX=341663 GN=mdmB PE=3 SV=1		5.35718			Mitochondria
Q4WT34	49733.4	Pre-mRNA-splicing factor prp46 OS=Neosartorya fumigata (strain ATCC MYA-4609 / Af293 / CBS 101355 / FGSC A1100) OX=330879 GN=prp46 PE=3 SV=1			4.35959		Nucleus
Q2U664	49875	Putative transferase caf17_ mitochondrial OS=Aspergillus oryzae (strain ATCC 42149 / RIB 40) OX=510516 GN=caf17 PE=3 SV=1			1.65278		Mitochondria
Q5BDJ5	49881	Probable cytosolic iron-sulfur protein assembly protein 1 OS=Emericella nidulans (strain FGSC A4 / ATCC 38163 / CBS 112.46 / NRRL 194 / M139) OX=227321 GN=cia1 PE=3 SV=2				16.0029	Cytosol
Q0CIQ3	49926.4	ATP-dependent rRNA helicase rrp3 OS=Aspergillus terreus (strain NIH 2624 / FGSC A1156) OX=341663 GN=rrp3 PE=3 SV=2		1.93091			Nucleus
Q5BB37;A1CZ92	49980.4	Carbamoyl-phosphate synthase arginine-specific small chain OS=Emericella nidulans (strain FGSC A4 / ATCC 38163 / CBS 112.46 / NRRL 194 / M139) OX=227321 GN=cpa-1 PE=2 SV=2				16.952	Cytoplasm
Q2UJY4	50068.3	Mitochondrial import inner membrane translocase subunit tim54 OS=Aspergillus oryzae (strain ATCC 42149 / RIB 40) OX=510516 GN=tim54 PE=3 SV=1			4.84286		Mitochondria
A9JPE1	50069.8	Indole diterpene prenyltransferase atmD OS=Aspergillus flavus OX=5059 GN=atmD PE=1 SV=2			2.75223		Cytoplasm
A1CA18	50102.4	Carbamoyl-phosphate synthase arginine-specific small chain OS=Aspergillus clavatus (strain ATCC 1007 / CBS 513.65 / DSM 816 / NCTC 3887 / NRRL 1) OX=344612 GN=cpa1 PE=3 SV=1				5.29669	Cytoplasm
Q5BGG1	50300.4	Methionine aminopeptidase 2-2 OS=Emericella nidulans (strain FGSC A4 / ATCC 38163 / CBS 112.46 / NRRL 194 / M139) OX=227321 GN=AN0369 PE=3 SV=2		2.9585			Cytoplasm
Q66WM4	50328.8	Mannose-6-phosphate isomerase OS=Neosartorya fumigata (strain ATCC MYA-4609 / Af293 / CBS 101355 / FGSC A1100) OX=330879 GN=pmi1 PE=2 SV=2			4.17001		Cytoplasm
Q4WUK1	50396.5	Palmitoyltransferase pfa5 OS=Neosartorya fumigata (strain ATCC MYA-4609 / Af293 / CBS 101355 / FGSC A1100) OX=330879 GN=pfa5 PE=3 SV=2				2.62895	Plasmembrene
A2RBA1	50424.2	Histone chaperone rtt106 OS=Aspergillus niger (strain CBS 513.88 / FGSC A1513) OX=425011 GN=rtt106 PE=3 SV=1		3.29408			Nucleus
P10874	50460.5	Tubulin beta-2 chain OS=Emericella nidulans (strain FGSC A4 / ATCC 38163 / CBS 112.46 / NRRL 194 / M139) OX=227321 GN=tubC PE=3 SV=2			1.6602		Cytoskeleton
Q2TWN3	50469.2	Adenylyltransferase and sulfurtransferase uba4 OS=Aspergillus oryzae (strain ATCC 42149 / RIB 40) OX=510516 GN=uba4 PE=3 SV=1			10.686		Cytoplasm
Q9Y713	50523.8	Elongation factor 1-alpha OS=Aspergillus oryzae (strain ATCC 42149 / RIB 40) OX=510516 GN=tef1 PE=3 SV=1			2.39708		Cytoplasm
P22012;Q00264;Q2U2U3	50528.7	Tubulin beta chain OS=Aspergillus flavus OX=5059 PE=3 SV=1			73.4144		Cytoskeleton
Q2U2I3;B8NIV9	50562.8	Probable mannan endo-1_4-beta-mannosidase F OS=Aspergillus oryzae (strain ATCC 42149 / RIB 40) OX=510516 GN=manF PE=3 SV=2	2.0566				Extracellular region
P24634	50572.4	Tubulin alpha-2 chain OS=Emericella nidulans (strain FGSC A4 / ATCC 38163 / CBS 112.46 / NRRL 194 / M139) OX=227321 GN=tubB PE=3 SV=2		2.47598		2.65205	Cytoskeleton
A1DAX2;B0YAA4;Q4WBK6	50608	Probable exopolygalacturonase B OS=Neosartorya fischeri (strain ATCC 1020 / DSM 3700 / CBS 544.65 / FGSC A1164 / JCM 1740 / NRRL 181 / WB 181) OX=331117 GN=pgxB PE=3 SV=1				8.4167	Extracellular region
Q0CTS1	50809.6	Histone chaperone rtt106 OS=Aspergillus terreus (strain NIH 2624 / FGSC A1156) OX=341663 GN=rtt106 PE=3 SV=1			5.48328	14.8689	Nucleus
Q4WHA3	50920.6	Actin-related protein 4 OS=Neosartorya fumigata (strain ATCC MYA-4609 / Af293 / CBS 101355 / FGSC A1100) OX=330879 GN=arp4 PE=3 SV=1			4.79235		Nucleus
Q5AVQ6	50933.8	Probable alpha-galactosidase B OS=Emericella nidulans (strain FGSC A4 / ATCC 38163 / CBS 112.46 / NRRL 194 / M139) OX=227321 GN=aglB PE=2 SV=2	2.05416				Extracellular region
G3XMD0	50948.7	FAD-linked oxidoreductase azaL OS=Aspergillus niger (strain ATCC 1015 / CBS 113.46 / FGSC A1144 / LSHB Ac4 / NCTC 3858a / NRRL 328 / USDA 3528.7) OX=380704 GN=azaL PE=2 SV=2		1.97764			Extracellular region
A1DC62	51089.8	Eukaryotic translation initiation factor 3 subunit M OS=Neosartorya fischeri (strain ATCC 1020 / DSM 3700 / CBS 544.65 / FGSC A1164 / JCM 1740 / NRRL 181 / WB 181) OX=331117 GN=NFIA_024940 PE=3 SV=1			2.5066		Cytoplasm
A2R6G7	51129.1	Ochratoxin halogenase ota5 OS=Aspergillus niger (strain CBS 513.88 / FGSC A1513) OX=425011 GN=ota5 PE=3 SV=1			2.01398		Extracellular region
P0DOW1	51157.4	Asperlicin C monooxygenase OS=Petromyces alliaceus OX=209559 GN=aspB PE=1 SV=1			2.60892		Cytoplasm
C8VQ61	51247.4	Questin oxidase OS=Emericella nidulans (strain FGSC A4 / ATCC 38163 / CBS 112.46 / NRRL 194 / M139) OX=227321 GN=mdpL PE=3 SV=1				1.86034	Nucleus
Q5B5E7	51321.9	ATP-dependent rRNA helicase rrp3 OS=Emericella nidulans (strain FGSC A4 / ATCC 38163 / CBS 112.46 / NRRL 194 / M139) OX=227321 GN=rrp3 PE=3 SV=1				13.7698	Nucleus
B0YD89;Q50I20	51469.2	2-methylcitrate synthase_ mitochondrial OS=Neosartorya fumigata (strain CEA10 / CBS 144.89 / FGSC A1163) OX=451804 GN=mcsA PE=1 SV=1				36.6324	Mitochondria
P22209	51545.7	Serine/threonine-protein kinase KIN3 OS=Saccharomyces cerevisiae (strain ATCC 204508 / S288c) OX=559292 GN=KIN3 PE=3 SV=2		1.57664			Cytoskeleton
Q5AW89	51608.3	Actin-related protein 4 OS=Emericella nidulans (strain FGSC A4 / ATCC 38163 / CBS 112.46 / NRRL 194 / M139) OX=227321 GN=arp4 PE=3 SV=1			2.19541		Nucleus
Q2UGK1	51769	Ribosome biogenesis protein ytm1 OS=Aspergillus oryzae (strain ATCC 42149 / RIB 40) OX=510516 GN=ytm1 PE=3 SV=1	2.08865				Nucleus
Q9C1T1	51827.5	3-phytase A OS=Aspergillus oryzae (strain ATCC 42149 / RIB 40) OX=510516 GN=phyA PE=2 SV=1			2.90366		Extracellular region
B8NC10	52007	Probable Xaa-Pro aminopeptidase pepP OS=Aspergillus flavus (strain ATCC 200026 / FGSC A1120 / NRRL 3357 / JCM 12722 / SRRC 167) OX=332952 GN=pepP PE=3 SV=1	4.31934				Cytoplasm
B0Y5V6;Q4WP10	52111.3	Ribosome biogenesis protein ytm1 OS=Neosartorya fumigata (strain CEA10 / CBS 144.89 / FGSC A1163) OX=451804 GN=ytm1 PE=3 SV=1			8.14506	3.7285	Nucleus
A1CCP2	52145.2	Methionine aminopeptidase 2-1 OS=Aspergillus clavatus (strain ATCC 1007 / CBS 513.65 / DSM 816 / NCTC 3887 / NRRL 1) OX=344612 GN=ACLA_062640 PE=3 SV=1			4.0846		Cytoplasm
P51955	52162.7	Serine/threonine-protein kinase Nek2 OS=Homo sapiens OX=9606 GN=NEK2 PE=1 SV=1			3.63554		Nucleus
A2QAF9	52205.1	Methionine aminopeptidase 2-1 OS=Aspergillus niger (strain CBS 513.88 / FGSC A1513) OX=425011 GN=An01g11360 PE=3 SV=1		3.25613			Cytoplasm
A1CSI0	52223.9	Probable Xaa-Pro aminopeptidase pepP OS=Aspergillus clavatus (strain ATCC 1007 / CBS 513.65 / DSM 816 / NCTC 3887 / NRRL 1) OX=344612 GN=pepP PE=3 SV=1			1851.04		Cytoplasm
A1CR32;A1D405;Q4WJE9;A2RB17	52369.1	ATP-dependent rRNA helicase rrp3 OS=Aspergillus clavatus (strain ATCC 1007 / CBS 513.65 / DSM 816 / NCTC 3887 / NRRL 1) OX=344612 GN=rrp3 PE=3 SV=1			2.85309		Nucleus
A2QUR1	52382.4	Phosphatidylinositol transfer protein sfh5 OS=Aspergillus niger (strain CBS 513.88 / FGSC A1513) OX=425011 GN=sfh5 PE=3 SV=1			1.89094		Endoplasmic Reticulum
Q5BEJ5	52433.1	FAD-linked oxidoreductase afoF OS=Emericella nidulans (strain FGSC A4 / ATCC 38163 / CBS 112.46 / NRRL 194 / M139) OX=227321 GN=afoF PE=1 SV=1			1.53977		Extracellular region
A0A0N7D483	52440.7	Polyketide synthase-related protein Dhc1 OS=Alternaria cinerariae OX=216837 GN=Dhc1 PE=2 SV=1			3.01953		Mitochondria
A1DED8	52596.6	Adenylyltransferase and sulfurtransferase uba4 OS=Neosartorya fischeri (strain ATCC 1020 / DSM 3700 / CBS 544.65 / FGSC A1164 / JCM 1740 / NRRL 181 / WB 181) OX=331117 GN=uba4 PE=3 SV=1				1.8941	Cytoplasm
Q2UPC3	52620.7	C6 finger domain transcription factor aclZ OS=Aspergillus oryzae (strain ATCC 42149 / RIB 40) OX=510516 GN=aclZ PE=3 SV=1				1.68965	Nucleus
B8NI25	52781	Amino acid oxidase imqH OS=Aspergillus flavus (strain ATCC 200026 / FGSC A1120 / NRRL 3357 / JCM 12722 / SRRC 167) OX=332952 GN=imqH PE=2 SV=1				76.2692	Peroxisomes
Q4WHW1	52782.9	Protein png1 OS=Neosartorya fumigata (strain ATCC MYA-4609 / Af293 / CBS 101355 / FGSC A1100) OX=330879 GN=png1 PE=3 SV=1		1.83474			Cytosol
Q50EL0	52862.1	Tryptophan dimethylallyltransferase OS=Neosartorya fumigata (strain ATCC MYA-4609 / Af293 / CBS 101355 / FGSC A1100) OX=330879 GN=dmaW PE=1 SV=2				3.33268	Nucleus
O59954	52873.7	Adenylyltransferase and sulfurtransferase uba4 OS=Emericella nidulans (strain FGSC A4 / ATCC 38163 / CBS 112.46 / NRRL 194 / M139) OX=227321 GN=uba4 PE=1 SV=2		1.72227			Cytoplasm
B9WZX3;Q4WAW7	52892	Tryprostatin B synthase OS=Neosartorya fumigata OX=746128 GN=ftmPT1 PE=3 SV=1			6.53825		Cytoplasm
G3XMC5	52906.1	Azaphilone cluster-specific transcription factor azaR OS=Aspergillus niger (strain ATCC 1015 / CBS 113.46 / FGSC A1144 / LSHB Ac4 / NCTC 3858a / NRRL 328 / USDA 3528.7) OX=380704 GN=azaR PE=3 SV=2		1.81648			Nucleus
Q4WYG3	52916	7-dimethylallyltryptophan synthase OS=Neosartorya fumigata (strain ATCC MYA-4609 / Af293 / CBS 101355 / FGSC A1100) OX=330879 GN=etpPT PE=1 SV=2		1.81084		5.30533	Cytoskeleton
Q5BEG5	52992.1	Transcription factor iws1 OS=Emericella nidulans (strain FGSC A4 / ATCC 38163 / CBS 112.46 / NRRL 194 / M139) OX=227321 GN=iws1 PE=3 SV=2			2.60109		Nucleus
O00107	53108.2	3-phytase A OS=Thielavia heterothallica OX=78579 GN=PHYA PE=1 SV=1			11.4905		Extracellular region
G3XMC3	53225.6	Cytochrome P450 monooxygenase azaI OS=Aspergillus niger (strain ATCC 1015 / CBS 113.46 / FGSC A1144 / LSHB Ac4 / NCTC 3858a / NRRL 328 / USDA 3528.7) OX=380704 GN=azaI PE=2 SV=1			2.23582		Plasma membrane
A2R7T0	53236.2	Kynureninase 1 OS=Aspergillus niger (strain CBS 513.88 / FGSC A1513) OX=425011 GN=bna5-1 PE=3 SV=1		17.1497			Cytoplasm
A2QUY7	53259.6	ATP-dependent RNA helicase dbp5 OS=Aspergillus niger (strain CBS 513.88 / FGSC A1513) OX=425011 GN=dbp5 PE=3 SV=1				10.1392	Nucleus
A1CM86	53269.7	Maintenance of mitochondrial morphology protein 1 OS=Aspergillus clavatus (strain ATCC 1007 / CBS 513.65 / DSM 816 / NCTC 3887 / NRRL 1) OX=344612 GN=mmm1 PE=3 SV=1			2.40538	2.5821	Endoplasmic Reticulum
P56271	53448.8	Acid alpha-amylase OS=Aspergillus niger OX=5061 PE=1 SV=1	2.69559				Endoplasmic Reticulum
Q5AXH1	53488.8	Actin-like protein arp6 OS=Emericella nidulans (strain FGSC A4 / ATCC 38163 / CBS 112.46 / NRRL 194 / M139) OX=227321 GN=arp6 PE=3 SV=1			20.3509		Cytoplasm
Q5BF48	53549.7	Probable Xaa-Pro aminopeptidase AN0832 OS=Emericella nidulans (strain FGSC A4 / ATCC 38163 / CBS 112.46 / NRRL 194 / M139) OX=227321 GN=AN0832 PE=3 SV=1			3.5568		Cytoplasm
Q4WR21	53559.1	Acyltransferase helD1 OS=Neosartorya fumigata (strain ATCC MYA-4609 / Af293 / CBS 101355 / FGSC A1100) OX=330879 GN=helD1 PE=1 SV=1				7.51857	Cytoplasm
Q4WF55	53590.1	N(5)-hydroxyornithine:cis-anhydromevalonyl coenzyme A-N(5)-transacylase sidF OS=Neosartorya fumigata (strain ATCC MYA-4609 / Af293 / CBS 101355 / FGSC A1100) OX=330879 GN=sidF PE=2 SV=1	9.9957				Peroxisomes
C8VQ98	53639.2	FAD-dependent monooxygenase ausM OS=Emericella nidulans (strain FGSC A4 / ATCC 38163 / CBS 112.46 / NRRL 194 / M139) OX=227321 GN=ausM PE=3 SV=1			5.86687		Plasma membrane
Q5B3U2	53701.2	Pre-mRNA-splicing factor slu7 OS=Emericella nidulans (strain FGSC A4 / ATCC 38163 / CBS 112.46 / NRRL 194 / M139) OX=227321 GN=slu7 PE=3 SV=1				1.76177	Nucleus
Q0CDT1	53752.3	ATP-dependent RNA helicase dbp5 OS=Aspergillus terreus (strain NIH 2624 / FGSC A1156) OX=341663 GN=dbp5 PE=3 SV=1			8.09967	8.37307	Nucleus
Q2U3W4	53759.4	tRNA (adenine(58)-N(1))-methyltransferase catalytic subunit trm61 OS=Aspergillus oryzae (strain ATCC 42149 / RIB 40) OX=510516 GN=trm61 PE=3 SV=1				1.90522	Nucleus
B0XTJ7;Q4WII3;A1CYM1	53793.2	Methionine aminopeptidase 2-1 OS=Neosartorya fumigata (strain CEA10 / CBS 144.89 / FGSC A1163) OX=451804 GN=AFUB_018820 PE=3 SV=1				6.37531	Cytoplasm
A1DLT0	53851.1	Maintenance of mitochondrial morphology protein 1 OS=Neosartorya fischeri (strain ATCC 1020 / DSM 3700 / CBS 544.65 / FGSC A1164 / JCM 1740 / NRRL 181 / WB 181) OX=331117 GN=mmm1 PE=3 SV=1				5.63205	Endoplasmic Reticulum
B0YD09;Q4WDE0	53982.3	Maintenance of mitochondrial morphology protein 1 OS=Neosartorya fumigata (strain CEA10 / CBS 144.89 / FGSC A1163) OX=451804 GN=mmm1 PE=3 SV=2				9.83475	Endoplasmic Reticulum
B0XMT4;Q4WRZ5	54011.5	Probable mannosyl-oligosaccharide alpha-1_2-mannosidase 1B OS=Neosartorya fumigata (strain CEA10 / CBS 144.89 / FGSC A1163) OX=451804 GN=mns1B PE=3 SV=1				14.424	Cytoplasm
Q0CJ57	54048	Cytochrome P450 monooxygenase atE OS=Aspergillus terreus (strain NIH 2624 / FGSC A1156) OX=341663 GN=atE PE=1 SV=1	3.44886				Mitochondria
Q0C9L4	54230.2	FAD-dependent monooxygenase ctvC OS=Aspergillus terreus (strain NIH 2624 / FGSC A1156) OX=341663 GN=ctvC PE=1 SV=1			4.81516		Plasma membrane
Q4X1D7	54253.3	Pre-mRNA-splicing factor cwc25 OS=Neosartorya fumigata (strain ATCC MYA-4609 / Af293 / CBS 101355 / FGSC A1100) OX=330879 GN=cwc25 PE=3 SV=1			3.01293		Nucleus
P80581	54381.3	Hexokinase OS=Emericella nidulans (strain FGSC A4 / ATCC 38163 / CBS 112.46 / NRRL 194 / M139) OX=227321 GN=hxkA PE=1 SV=2			6.54478		Cytosol
P03913	54412.9	NADH-ubiquinone oxidoreductase chain 4 OS=Aspergillus amstelodami OX=5054 GN=ND4 PE=3 SV=1				10.7032	Mitochondria
A2RB71	54415.3	Protein sds23 OS=Aspergillus niger (strain CBS 513.88 / FGSC A1513) OX=425011 GN=sds23 PE=3 SV=1			2.84573		Nucleus
P08157	54423.8	Aldehyde dehydrogenase OS=Emericella nidulans (strain FGSC A4 / ATCC 38163 / CBS 112.46 / NRRL 194 / M139) OX=227321 GN=aldA PE=3 SV=2			1.73723		Extracellular region
A1CBF3	54472.6	Increased rDNA silencing protein 4 OS=Aspergillus clavatus (strain ATCC 1007 / CBS 513.65 / DSM 816 / NCTC 3887 / NRRL 1) OX=344612 GN=irs4 PE=3 SV=1	2.13514				Nucleus
B8NU03	54503.1	MFS-type transporter lnaF OS=Aspergillus flavus (strain ATCC 200026 / FGSC A1120 / NRRL 3357 / JCM 12722 / SRRC 167) OX=332952 GN=lnaF PE=2 SV=1		1.86422			Plasma membrane
A1CRF7	54539	tRNA (guanine-N(7)-)-methyltransferase non-catalytic subunit trm82 OS=Aspergillus clavatus (strain ATCC 1007 / CBS 513.65 / DSM 816 / NCTC 3887 / NRRL 1) OX=344612 GN=trm82 PE=3 SV=1		1.59954			Nucleus
Q4WWR2	54658.5	Pre-mRNA-splicing factor slu7 OS=Neosartorya fumigata (strain ATCC MYA-4609 / Af293 / CBS 101355 / FGSC A1100) OX=330879 GN=slu7 PE=3 SV=2			1.66912	7.06071	Nucleus
O43100	54660.4	H/ACA ribonucleoprotein complex subunit CBF5 OS=Emericella nidulans (strain FGSC A4 / ATCC 38163 / CBS 112.46 / NRRL 194 / M139) OX=227321 GN=cbf5 PE=2 SV=1			4.69519		Nucleus
Q2UEA0	54750	Probable kinetochore protein nuf2 OS=Aspergillus oryzae (strain ATCC 42149 / RIB 40) OX=510516 GN=nuf2 PE=3 SV=1				1.7074	Nucleus
Q9P905	54779.4	pH-response regulator protein palC OS=Emericella nidulans (strain FGSC A4 / ATCC 38163 / CBS 112.46 / NRRL 194 / M139) OX=227321 GN=palC PE=3 SV=2		1.54404		6.82858	Endosomes
C8VP36	54785.1	6-phosphogluconate dehydrogenase_ decarboxylating OS=Emericella nidulans (strain FGSC A4 / ATCC 38163 / CBS 112.46 / NRRL 194 / M139) OX=227321 GN=AN10233 PE=3 SV=1			1.77798		Cytoplasm
Q5B0H8	54859.3	Kynureninase 1 OS=Emericella nidulans (strain FGSC A4 / ATCC 38163 / CBS 112.46 / NRRL 194 / M139) OX=227321 GN=bna5-1 PE=3 SV=1			7.33407		Cytoplasm
A1C5V3	54922.8	ATP-dependent RNA helicase dbp3 OS=Aspergillus clavatus (strain ATCC 1007 / CBS 513.65 / DSM 816 / NCTC 3887 / NRRL 1) OX=344612 GN=dbp3 PE=3 SV=1				1.85468	Nucleus
K0E681	54935.4	Putative glycosyl hydrolase ecdF OS=Aspergillus rugulosus OX=41736 GN=ecdF PE=1 SV=1		3.11095			Cytosol
A2QGA1	55031.4	Mannitol 2-dehydrogenase OS=Aspergillus niger (strain CBS 513.88 / FGSC A1513) OX=425011 GN=An03g02430 PE=3 SV=1		3.19359			Cytoplasm
A1DGW6;B0XS74;Q4X1D2	55060.3	Eukaryotic translation initiation factor 3 subunit L OS=Neosartorya fischeri (strain ATCC 1020 / DSM 3700 / CBS 544.65 / FGSC A1164 / JCM 1740 / NRRL 181 / WB 181) OX=331117 GN=NFIA_085780 PE=3 SV=1				22.1142	Cytoplasm
Q4WEY4	55176.9	Glutamyl-tRNA(Gln) amidotransferase subunit A_ mitochondrial OS=Neosartorya fumigata (strain ATCC MYA-4609 / Af293 / CBS 101355 / FGSC A1100) OX=330879 GN=AFUA_3G04130 PE=3 SV=1			3.41531		Mitochondria
Q92406	55193.5	NADH-ubiquinone oxidoreductase 51 kDa subunit_ mitochondrial OS=Aspergillus niger OX=5061 GN=NUO51 PE=3 SV=1			2.32186		Mitochondria
O43102	55239	H/ACA ribonucleoprotein complex subunit cbf5 OS=Neosartorya fumigata (strain ATCC MYA-4609 / Af293 / CBS 101355 / FGSC A1100) OX=330879 GN=cbf5 PE=2 SV=1	2.4641			4.99346	Nucleus
Q0CZM6	55291.4	Probable Xaa-Pro aminopeptidase ATEG_00858 OS=Aspergillus terreus (strain NIH 2624 / FGSC A1156) OX=341663 GN=ATEG_00858 PE=3 SV=1	4.01281		2.3022	1.8237	Cytoplasm
Q6F5E4	55310.5	Cytochrome P450 monooxygenase 1 OS=Pleospora betae OX=137527 GN=PbP450-1 PE=1 SV=1			2.96879		Extracellular region
P0C1B3;P30292;Q02905;Q02906	55323.5	Alpha-amylase A type-1/2 OS=Aspergillus oryzae (strain ATCC 42149 / RIB 40) OX=510516 GN=amy1 PE=1 SV=1			2.82273		Extracellular region
Q4WD43	55385.4	Amino acid oxidase fmpA OS=Neosartorya fumigata (strain ATCC MYA-4609 / Af293 / CBS 101355 / FGSC A1100) OX=330879 GN=fmpA PE=1 SV=1		1.64935			Extracellular region
Q02905;Q02906;P0C1B3;P30292	55393.7	Alpha-amylase A OS=Aspergillus awamori OX=105351 GN=amyA PE=3 SV=1		1.7988			Extracellular region
C8VJ35	55453.2	tRNA (guanine(37)-N1)-methyltransferase OS=Emericella nidulans (strain FGSC A4 / ATCC 38163 / CBS 112.46 / NRRL 194 / M139) OX=227321 GN=trm5 PE=3 SV=1			1.93826		Mitochondria
A2QAY5	55591.6	Protein dml1 OS=Aspergillus niger (strain CBS 513.88 / FGSC A1513) OX=425011 GN=dml1 PE=3 SV=1			2.52398		Mitochondria
A2QHE5	55600.3	Ferulic acid decarboxylase 1 OS=Aspergillus niger (strain CBS 513.88 / FGSC A1513) OX=425011 GN=fdc1 PE=1 SV=1			4.16801		Cytoplasm
Q6UEG2	55655.6	Cytochrome P450 monooxygenase aflN OS=Aspergillus parasiticus (strain ATCC 56775 / NRRL 5862 / SRRC 143 / SU-1) OX=1403190 GN=aflN PE=3 SV=1				2.74303	Mitochondria
C8VJW1	55684.4	Major facilitator-type transporter hxnP OS=Emericella nidulans (strain FGSC A4 / ATCC 38163 / CBS 112.46 / NRRL 194 / M139) OX=227321 GN=hxnP PE=2 SV=1				2.43992	Plasma membrane
B8NM73	55689.8	Flavin-containing monooxygenase ustF2 OS=Aspergillus flavus (strain ATCC 200026 / FGSC A1120 / NRRL 3357 / JCM 12722 / SRRC 167) OX=332952 GN=ustF2 PE=1 SV=1			2.0835		Extracellular region
Q0C8A1	55714.4	Cytochrome P450 monooxygenase trt6 OS=Aspergillus terreus (strain NIH 2624 / FGSC A1156) OX=341663 GN=trt6 PE=1 SV=1		1.6054			Plasma membrane
A2R3F3	55795.3	Sensitive to high expression protein 9 homolog_ mitochondrial OS=Aspergillus niger (strain CBS 513.88 / FGSC A1513) OX=425011 GN=she9 PE=3 SV=1			1.72083		Mitochondria
A2QPD9	55875.5	Kynurenine 3-monooxygenase 3 OS=Aspergillus niger (strain CBS 513.88 / FGSC A1513) OX=425011 GN=bna4-3 PE=3 SV=1		5.18275			Mitochondria
Q8TGG8	55877.8	Probable guanosine-diphosphatase OS=Neosartorya fumigata (strain ATCC MYA-4609 / Af293 / CBS 101355 / FGSC A1100) OX=330879 GN=gda1 PE=3 SV=2	3.627		3.4146		Golgi apparatus
Q2UQJ5	55958.8	Protein dml1 OS=Aspergillus oryzae (strain ATCC 42149 / RIB 40) OX=510516 GN=dml1 PE=3 SV=1			5.78089		Mitochondria
A1CLY9	56035	Cytochrome P450 monooxygenase ccsD OS=Aspergillus clavatus (strain ATCC 1007 / CBS 513.65 / DSM 816 / NCTC 3887 / NRRL 1) OX=344612 GN=ccsD PE=3 SV=1			2.57811		Plasma membrane
Q4WV30	56051.8	Sensitive to high expression protein 9 homolog_ mitochondrial OS=Neosartorya fumigata (strain ATCC MYA-4609 / Af293 / CBS 101355 / FGSC A1100) OX=330879 GN=she9 PE=3 SV=1			3.47017	26.1053	Mitochondria
Q5BDC8	56323.9	Nucleolar protein 12 OS=Emericella nidulans (strain FGSC A4 / ATCC 38163 / CBS 112.46 / NRRL 194 / M139) OX=227321 GN=nop12 PE=3 SV=1				4.14162	Nucleus
Q4WHG1	56425	Histone acetyltransferase esa1 OS=Neosartorya fumigata (strain ATCC MYA-4609 / Af293 / CBS 101355 / FGSC A1100) OX=330879 GN=esa1 PE=3 SV=1				17.1853	Nucleus
Q0D076	56459.8	Probable mannosyl-oligosaccharide alpha-1_2-mannosidase 1B OS=Aspergillus terreus (strain NIH 2624 / FGSC A1156) OX=341663 GN=mns1B PE=3 SV=1	2.61113			4.98546	Plasma membrane
Q9UVX3	56483.7	Glycylpeptide N-tetradecanoyltransferase OS=Neosartorya fumigata (strain ATCC MYA-4609 / Af293 / CBS 101355 / FGSC A1100) OX=330879 GN=nmt1 PE=1 SV=1			1.61944		Cytoplasm
A1CP08	56495.7	Probable mannosyl-oligosaccharide alpha-1_2-mannosidase 1B OS=Aspergillus clavatus (strain ATCC 1007 / CBS 513.65 / DSM 816 / NCTC 3887 / NRRL 1) OX=344612 GN=mns1B PE=3 SV=1	8.05061				Cytoplasm
A0A2Z5TJB0	56585.1	Transcription factor himB OS=Aspergillus japonicus OX=34381 GN=himB PE=3 SV=1		3.95467			Nucleus
Q13188	56586.4	Serine/threonine-protein kinase 3 OS=Homo sapiens OX=9606 GN=STK3 PE=1 SV=2	1.83266		7.2117		Nucleus
Q8TFN1	56646.7	Glycylpeptide N-tetradecanoyltransferase OS=Emericella nidulans (strain FGSC A4 / ATCC 38163 / CBS 112.46 / NRRL 194 / M139) OX=227321 GN=swoF PE=1 SV=2			3.34231		Cytoplasm
A1CNV1	56766	Protein dml1 OS=Aspergillus clavatus (strain ATCC 1007 / CBS 513.65 / DSM 816 / NCTC 3887 / NRRL 1) OX=344612 GN=dml1 PE=3 SV=1				1.60346	Mitochondria
C8VJZ7	56790.9	Putative alpha-galactosidase 8 OS=Emericella nidulans (strain FGSC A4 / ATCC 38163 / CBS 112.46 / NRRL 194 / M139) OX=227321 GN=agl8 PE=5 SV=2		3.03416			Extracellular region
A0A1D3PCM3;Q5AT15	56845	Serine O-succinyltransferase OS=Emericella nidulans OX=162425 GN=CysA PE=1 SV=1				2.77989	Mitochondria
Q5B9G5	56868.1	Mannitol 2-dehydrogenase OS=Emericella nidulans (strain FGSC A4 / ATCC 38163 / CBS 112.46 / NRRL 194 / M139) OX=227321 GN=AN2815 PE=3 SV=2				772.839	Cytoplasm
A1DDY6	56902.2	Increased rDNA silencing protein 4 OS=Neosartorya fischeri (strain ATCC 1020 / DSM 3700 / CBS 544.65 / FGSC A1164 / JCM 1740 / NRRL 181 / WB 181) OX=331117 GN=irs4 PE=3 SV=1		4.47523			Nucleus
A1CKJ0	56931.2	ATP-dependent RNA helicase dbp8 OS=Aspergillus clavatus (strain ATCC 1007 / CBS 513.65 / DSM 816 / NCTC 3887 / NRRL 1) OX=344612 GN=dbp8 PE=3 SV=1				16.396	Nucleus
Q4WQI6	56972.5	Sorting nexin-4 OS=Neosartorya fumigata (strain ATCC MYA-4609 / Af293 / CBS 101355 / FGSC A1100) OX=330879 GN=snx4 PE=3 SV=1	2.07366			2.43864	Cytoplasm
K0E684	56977.1	Cytochrome P450 monooxygenase ecdH OS=Aspergillus rugulosus OX=41736 GN=ecdH PE=1 SV=1	1.88315			1.7104	Plasma membrane
Q01870	56998.8	Developmental regulatory protein wetA OS=Penicillium rubens (strain ATCC 28089 / DSM 1075 / NRRL 1951 / Wisconsin 54-1255) OX=500485 GN=wetA PE=2 SV=2			1.88462		Nucleus
E9QYP0	57161.9	L-ornithine N(5)-monooxygenase OS=Neosartorya fumigata (strain ATCC MYA-4609 / Af293 / CBS 101355 / FGSC A1100) OX=330879 GN=sidA PE=1 SV=1			2.12114		Nucleus
Q2UMB1	57220.9	Histone chaperone rtt106 OS=Aspergillus oryzae (strain ATCC 42149 / RIB 40) OX=510516 GN=rtt106 PE=3 SV=2				3.53888	Nucleus
B8NCU7;Q2U0Q1	57243.6	Probable rhamnogalacturonate lyase A OS=Aspergillus flavus (strain ATCC 200026 / FGSC A1120 / NRRL 3357 / JCM 12722 / SRRC 167) OX=332952 GN=rglA PE=3 SV=1	2.42894				Extracellular region
Q2UM19	57256	mRNA cap guanine-N7 methyltransferase OS=Aspergillus oryzae (strain ATCC 42149 / RIB 40) OX=510516 GN=abd1 PE=3 SV=1	1.72418			9.55531	Nucleus
B0XQB2;Q4WTB3	57256.6	Probable alpha-L-arabinofuranosidase C OS=Neosartorya fumigata (strain CEA10 / CBS 144.89 / FGSC A1163) OX=451804 GN=abfC PE=3 SV=2				6.84619	Extracellular region
Q2TZB2	57283.2	L-ornithine N(5)-monooxygenase OS=Aspergillus oryzae (strain ATCC 42149 / RIB 40) OX=510516 GN=dffA PE=1 SV=2				2.54899	Extracellular region
A1DNL0;Q0CMT2;Q9UVS8	57300.6	Probable 1_4-beta-D-glucan cellobiohydrolase B OS=Neosartorya fischeri (strain ATCC 1020 / DSM 3700 / CBS 544.65 / FGSC A1164 / JCM 1740 / NRRL 181 / WB 181) OX=331117 GN=cbhB PE=3 SV=1			1.90742		Extracellular region
Q4WRU4	57646.3	Protein dml1 OS=Neosartorya fumigata (strain ATCC MYA-4609 / Af293 / CBS 101355 / FGSC A1100) OX=330879 GN=dml1 PE=3 SV=1	2.56819				Mitochondria
Q0CNX1	57749.1	ATP-dependent RNA helicase dbp8 OS=Aspergillus terreus (strain NIH 2624 / FGSC A1156) OX=341663 GN=dbp8 PE=3 SV=1	3.15907				Nucleus
Q5BBM1	57785	Sexual development regulator velC OS=Emericella nidulans (strain FGSC A4 / ATCC 38163 / CBS 112.46 / NRRL 194 / M139) OX=227321 GN=velC PE=1 SV=1				2.70951	Nucleus
Q2U5A2	57837.7	ATP-dependent RNA helicase dhh1 OS=Aspergillus oryzae (strain ATCC 42149 / RIB 40) OX=510516 GN=dhh1 PE=3 SV=1				2.30358	Nucleus
A1D1R1	57860.5	Protein dml1 OS=Neosartorya fischeri (strain ATCC 1020 / DSM 3700 / CBS 544.65 / FGSC A1164 / JCM 1740 / NRRL 181 / WB 181) OX=331117 GN=dml1 PE=3 SV=1	1.76105				Mitochondria
C8VI81	58030.2	Cytochrome P450 monooxygenase pkfB OS=Emericella nidulans (strain FGSC A4 / ATCC 38163 / CBS 112.46 / NRRL 194 / M139) OX=227321 GN=pkfkB PE=1 SV=1			5.47044		Plasma membrane
C8V213	58202.1	DnaJ homolog 1_ mitochondrial OS=Emericella nidulans (strain FGSC A4 / ATCC 38163 / CBS 112.46 / NRRL 194 / M139) OX=227321 GN=AN10778 PE=3 SV=1		2.1132		3.44994	Mitochondria
A1CTK4	58206.9	Probable feruloyl esterase B OS=Aspergillus clavatus (strain ATCC 1007 / CBS 513.65 / DSM 816 / NCTC 3887 / NRRL 1) OX=344612 GN=faeB PE=3 SV=1	2.56125		2.69146		Extracellular region
P51956	58218	Serine/threonine-protein kinase Nek3 OS=Homo sapiens OX=9606 GN=NEK3 PE=1 SV=2	2.97364				Cytoplasm
Q5BD29	58356.5	Probable beta-glucosidase btgE OS=Emericella nidulans (strain FGSC A4 / ATCC 38163 / CBS 112.46 / NRRL 194 / M139) OX=227321 GN=btgE PE=1 SV=1		106.339			Cell wall
S3D775	58384.6	Cytochrome P450 monooxygenase gloO OS=Glarea lozoyensis (strain ATCC 20868 / MF5171) OX=1116229 GN=gloO PE=1 SV=1			9.94351		Extracellular region
Q078T0	58438	3-hydroxyphenylacetate 6-hydroxylase OS=Emericella nidulans OX=162425 GN=phacB PE=1 SV=1			2.05051		Cytoplasm
Q2UUT4	58486.8	DNA damage-binding protein cmr1 OS=Aspergillus oryzae (strain ATCC 42149 / RIB 40) OX=510516 GN=AO090009000186 PE=3 SV=1				2.3208	Nucleus
Q12669	58533	Pyruvate kinase OS=Aspergillus niger OX=5061 GN=pkiA PE=3 SV=1	1.55834				Cytoplasm
A2R3G4;P87161	58560	Probable rhamnogalacturonase B OS=Aspergillus niger (strain CBS 513.88 / FGSC A1513) OX=425011 GN=rhgB PE=3 SV=1			3.09941		Extracellular region
M1WEN7;Q2PBY6	58580.7	Cyrochrome P450 monooxygenase cloA OS=Claviceps purpurea (strain 20.1) OX=1111077 GN=cloA PE=1 SV=1			2.67866		Plasma membrane
Q00075;O59921	58604.5	Alpha_alpha-trehalose-phosphate synthase [UDP-forming] 1 OS=Aspergillus niger OX=5061 GN=tpsA PE=3 SV=1				5.1701	Cytoplasm
B8NU02	58629	Cytochrome P450 monooxygenase lnaD OS=Aspergillus flavus (strain ATCC 200026 / FGSC A1120 / NRRL 3357 / JCM 12722 / SRRC 167) OX=332952 GN=lnaD PE=2 SV=1				2.67088	Plasma membrane
P22360	58646	Pyruvate kinase OS=Emericella nidulans (strain FGSC A4 / ATCC 38163 / CBS 112.46 / NRRL 194 / M139) OX=227321 GN=pkiA PE=3 SV=2				10.2797	Cytoplasm
Q2UMQ5	58734.4	Histone acetyltransferase ESA1 OS=Aspergillus oryzae (strain ATCC 42149 / RIB 40) OX=510516 GN=esa1 PE=3 SV=1	11.8785				Nucleus
E9RCR4	58797	Cytochrome P450 monooxygenase gliC OS=Neosartorya fumigata (strain ATCC MYA-4609 / Af293 / CBS 101355 / FGSC A1100) OX=330879 GN=gliC PE=1 SV=1			4.03001		Extracellular region
Q5B4R9	58798.1	Pre-mRNA-splicing factor spp2 OS=Emericella nidulans (strain FGSC A4 / ATCC 38163 / CBS 112.46 / NRRL 194 / M139) OX=227321 GN=spp2 PE=3 SV=1		1.90749			Nucleus
Q4WD42	58856	C6 finger transcription factor fmpR OS=Neosartorya fumigata (strain ATCC MYA-4609 / Af293 / CBS 101355 / FGSC A1100) OX=330879 GN=fmpR PE=2 SV=1	1.61165				Nucleus
B8N0E9	58905.2	Cytochrome P450 monooxygenase asaD OS=Aspergillus flavus (strain ATCC 200026 / FGSC A1120 / NRRL 3357 / JCM 12722 / SRRC 167) OX=332952 GN=asaD PE=2 SV=1			2.07653		Plasma membrane
Q4WXD3	58918.9	DNA replication regulator sld2 OS=Neosartorya fumigata (strain ATCC MYA-4609 / Af293 / CBS 101355 / FGSC A1100) OX=330879 GN=sld2 PE=3 SV=1	2.85838				Nucleus
Q5B6U3	58924.1	DNA damage-binding protein cmr1 OS=Emericella nidulans (strain FGSC A4 / ATCC 38163 / CBS 112.46 / NRRL 194 / M139) OX=227321 GN=AN3737 PE=3 SV=1	9.47261			1.60759	Nucleus
Q4WCH5	59100.3	Nucleolar protein 12 OS=Neosartorya fumigata (strain ATCC MYA-4609 / Af293 / CBS 101355 / FGSC A1100) OX=330879 GN=nop12 PE=3 SV=1				15.9376	Nucleus
Q2UP89	59103.2	Probable feruloyl esterase B-1 OS=Aspergillus oryzae (strain ATCC 42149 / RIB 40) OX=510516 GN=faeB-1 PE=1 SV=1				4.00697	Extracellular region
P48826	59235.6	Glucose-6-phosphate 1-dehydrogenase OS=Aspergillus niger OX=5061 GN=gsdA PE=2 SV=1			2.31749	5.20513	Peroxisomes
Q5B1L4	59271.6	GMP synthase [glutamine-hydrolyzing] OS=Emericella nidulans (strain FGSC A4 / ATCC 38163 / CBS 112.46 / NRRL 194 / M139) OX=227321 GN=gua1 PE=3 SV=1			3.99391		Cytoplasm
B9WZX4;Q4WAW8	59325.4	Fumitremorgin C synthase OS=Neosartorya fumigata OX=746128 GN=ftmP450-2 PE=1 SV=1			2.22094		Plasma membrane
A1CLY6	59403.1	Cytochalasin cluster regulator ccsR OS=Aspergillus clavatus (strain ATCC 1007 / CBS 513.65 / DSM 816 / NCTC 3887 / NRRL 1) OX=344612 GN=ccsR PE=3 SV=2				10.2063	Nucleus
O14730	59549.4	Serine/threonine-protein kinase RIO3 OS=Homo sapiens OX=9606 GN=RIOK3 PE=1 SV=2	2.36729				Cytoplasm
G5EB20	59583.5	GATA-type transcription factor sreA OS=Emericella nidulans (strain FGSC A4 / ATCC 38163 / CBS 112.46 / NRRL 194 / M139) OX=227321 GN=sreA PE=2 SV=1	3.17917				Nucleus
P15325	59656.3	Quinate permease OS=Emericella nidulans (strain FGSC A4 / ATCC 38163 / CBS 112.46 / NRRL 194 / M139) OX=227321 GN=qutD PE=1 SV=2			2.80126		Plasmembrene
A1DGZ7	60328.8	ATP-dependent RNA helicase dbp2 OS=Neosartorya fischeri (strain ATCC 1020 / DSM 3700 / CBS 544.65 / FGSC A1164 / JCM 1740 / NRRL 181 / WB 181) OX=331117 GN=dbp2 PE=3 SV=1	1.6586				Cytoplasm
Q0CY33	60410.2	Autophagy-related protein 17 OS=Aspergillus terreus (strain NIH 2624 / FGSC A1156) OX=341663 GN=atg17 PE=3 SV=1	5.28156				Cytoplasm
Q5BH85	60419.4	Increased rDNA silencing protein 4 OS=Emericella nidulans (strain FGSC A4 / ATCC 38163 / CBS 112.46 / NRRL 194 / M139) OX=227321 GN=irs4 PE=3 SV=1		19.5485	2.47564	12.7716	Plasma membrane
Q4WYG7	60452.6	Protein pns1 OS=Neosartorya fumigata (strain ATCC MYA-4609 / Af293 / CBS 101355 / FGSC A1100) OX=330879 GN=pns1 PE=3 SV=1		2.43201			Plasma membrane
P08158	60456.8	Acetamidase OS=Emericella nidulans (strain FGSC A4 / ATCC 38163 / CBS 112.46 / NRRL 194 / M139) OX=227321 GN=amdS PE=2 SV=1	1.94706				Cytoplasm
P28298	60492.7	Isocitrate lyase OS=Emericella nidulans (strain FGSC A4 / ATCC 38163 / CBS 112.46 / NRRL 194 / M139) OX=227321 GN=acuD PE=1 SV=3	2.21159			37.513	Peroxisomes
P14280	60522	Pectinesterase 1 OS=Solanum lycopersicum OX=4081 GN=PME1.9 PE=1 SV=5			5.71682		Cell wall
A2QQV6	60764.5	Probable quinate permease OS=Aspergillus niger (strain CBS 513.88 / FGSC A1513) OX=425011 GN=qutD PE=3 SV=1		1.69738			Plasma membrane
P28351	60832.7	Alpha-galactosidase A OS=Aspergillus niger OX=5061 GN=aglA PE=1 SV=1			2.57704		Extracellular region
A1CFL6	60950.7	Cytochrome P450 monooxygenase patI OS=Aspergillus clavatus (strain ATCC 1007 / CBS 513.65 / DSM 816 / NCTC 3887 / NRRL 1) OX=344612 GN=patI PE=1 SV=2				2.05172	Endoplasmic Reticulum
Q4W9G3	60979.6	Isocyanide synthase B OS=Neosartorya fumigata (strain ATCC MYA-4609 / Af293 / CBS 101355 / FGSC A1100) OX=330879 GN=icsB PE=3 SV=1			7.04065	3.27643	Cytoplasm
P28344	61025.6	Malate synthase_ glyoxysomal OS=Emericella nidulans (strain FGSC A4 / ATCC 38163 / CBS 112.46 / NRRL 194 / M139) OX=227321 GN=acuE PE=3 SV=3			1.97797		Peroxisomes
C8VTR6	61050.8	Putative acyl-coenzyme A synthetase OS=Emericella nidulans (strain FGSC A4 / ATCC 38163 / CBS 112.46 / NRRL 194 / M139) OX=227321 GN=AN10074 PE=3 SV=1			1.60942		Peroxisomes
Q00234	61061.1	Tyrosinase OS=Aspergillus oryzae (strain ATCC 42149 / RIB 40) OX=510516 GN=melO PE=1 SV=1			4.72464		Cytoplasm
Q4U3Y2	61121.8	Hexokinase-1 OS=Neosartorya fumigata (strain ATCC MYA-4609 / Af293 / CBS 101355 / FGSC A1100) OX=330879 GN=hxkA PE=2 SV=1	11.9554				Cytosol
Q6F5E2	61181.5	Cytochrome P450 monooxygenase 2 OS=Pleospora betae OX=137527 GN=PbP450-2 PE=1 SV=1			2.93658		Cytoplasm
Q9HGZ2	61214.2	Glucose-6-phosphate isomerase OS=Aspergillus oryzae (strain ATCC 42149 / RIB 40) OX=510516 GN=pgiA PE=2 SV=1		1.73823			Cytosol
Q5B0J9	61254.6	ATP-dependent RNA helicase dbp2 OS=Emericella nidulans (strain FGSC A4 / ATCC 38163 / CBS 112.46 / NRRL 194 / M139) OX=227321 GN=dbp2 PE=3 SV=1	3.84241	1.78991			Nucleus
K0E2F3	61298.3	Fatty-acyl-AMP ligase ecdI OS=Aspergillus rugulosus OX=41736 GN=ecdI PE=1 SV=1			2.21625		Cytoplasm
P28345	61408.1	Malate synthase_ glyoxysomal OS=Neurospora crassa (strain ATCC 24698 / 74-OR23-1A / CBS 708.71 / DSM 1257 / FGSC 987) OX=367110 GN=acu-9 PE=3 SV=2	10.2788				Peroxisomes
B8NXS9;Q2TYA1	61505.7	Carboxypeptidase Y homolog A OS=Aspergillus flavus (strain ATCC 200026 / FGSC A1120 / NRRL 3357 / JCM 12722 / SRRC 167) OX=332952 GN=cpyA PE=3 SV=1				26.6559	Vacuole
Q2UUM2	61667.1	Developmental regulatory protein wetA OS=Aspergillus oryzae (strain ATCC 42149 / RIB 40) OX=510516 GN=wetA PE=2 SV=1		2.6255	3.78827		Nucleus
Q5B041	62018	Heat shock protein 60 OS=Emericella nidulans (strain FGSC A4 / ATCC 38163 / CBS 112.46 / NRRL 194 / M139) OX=227321 GN=hsp60 PE=1 SV=1				2.08857	Mitochondria
Q6Q487	62082	Calnexin homolog OS=Neosartorya fumigata (strain ATCC MYA-4609 / Af293 / CBS 101355 / FGSC A1100) OX=330879 GN=AFUA_4G12850 PE=2 SV=2			2.02938	3.46454	Endoplasmic Reticulum
P30303	62082.7	M-phase inducer phosphatase OS=Emericella nidulans (strain FGSC A4 / ATCC 38163 / CBS 112.46 / NRRL 194 / M139) OX=227321 GN=nimT PE=2 SV=2			2.38319		Nucleus
Q96UP6	62140.4	DNA repair and recombination protein radC OS=Emericella nidulans (strain FGSC A4 / ATCC 38163 / CBS 112.46 / NRRL 194 / M139) OX=227321 GN=radC PE=3 SV=1	4.39338				Nucleus
Q9P8I0	62164.1	Delta-1-pyrroline-5-carboxylate dehydrogenase_ mitochondrial OS=Emericella nidulans (strain FGSC A4 / ATCC 38163 / CBS 112.46 / NRRL 194 / M139) OX=227321 GN=prnC PE=3 SV=2			1.60368		Mitochondria
Q5AR50	62217.4	FAD-dependent monooxygenase asqG OS=Emericella nidulans (strain FGSC A4 / ATCC 38163 / CBS 112.46 / NRRL 194 / M139) OX=227321 GN=asqG PE=3 SV=1		3.85344	3.08856		Plasma membrane
Q2U5W8	62479.4	Peptidyl-prolyl cis-trans isomerase-like 2 OS=Aspergillus oryzae (strain ATCC 42149 / RIB 40) OX=510516 GN=cyp8 PE=3 SV=1			2.70435		Nucleus
B8MXP5;Q2US39	62508.8	Probable beta-glucosidase btgE OS=Aspergillus flavus (strain ATCC 200026 / FGSC A1120 / NRRL 3357 / JCM 12722 / SRRC 167) OX=332952 GN=btgE PE=3 SV=1				2.58871	Cell wall
A1CWW9	62558.4	Mitochondrial distribution and morphology protein 34 OS=Neosartorya fischeri (strain ATCC 1020 / DSM 3700 / CBS 544.65 / FGSC A1164 / JCM 1740 / NRRL 181 / WB 181) OX=331117 GN=mdm34 PE=3 SV=1			4.94233		Mitochondria
Q4WZL8	62718.4	Palmitoyltransferase pfa3 OS=Neosartorya fumigata (strain ATCC MYA-4609 / Af293 / CBS 101355 / FGSC A1100) OX=330879 GN=pfa3 PE=3 SV=1			3.11872	2.80186	Vacuole
A0A0N7D7C9	62768.3	Dehydrocurvularin exporter OS=Alternaria cinerariae OX=216837 GN=Dhc2 PE=2 SV=1			25.828		Plasma membrane
A1CFM2	62946.8	FAD-linked oxidoreductase patO OS=Aspergillus clavatus (strain ATCC 1007 / CBS 513.65 / DSM 816 / NCTC 3887 / NRRL 1) OX=344612 GN=patO PE=1 SV=1			2.27178	4.26414	Vacuole
S3DQN8	62948.5	Cytochrome P450 monooxygenase gloP OS=Glarea lozoyensis (strain ATCC 20868 / MF5171) OX=1116229 GN=gloP PE=1 SV=1			2.33476		Cell membrene
B0Y7H6;Q4WN25	62977	Probable catabolite repression protein creC OS=Neosartorya fumigata (strain CEA10 / CBS 144.89 / FGSC A1163) OX=451804 GN=creC PE=3 SV=2			3.50209		Plasma membrane
A0A2Z5TMB8	63118.9	Cytochrome P450 monooxygenase himC OS=Aspergillus japonicus OX=34381 GN=himC PE=3 SV=1	3.15197				Plasma membrane
C8VTV4	63226.8	Developmental and secondary metabolism regulator veA OS=Emericella nidulans (strain FGSC A4 / ATCC 38163 / CBS 112.46 / NRRL 194 / M139) OX=227321 GN=veA PE=1 SV=2				2.74013	Cytoplasm
Q0CNV1	63245.8	Pyruvate decarboxylase OS=Aspergillus terreus (strain NIH 2624 / FGSC A1156) OX=341663 GN=pdcA PE=3 SV=1	1.94826				Cytoplasm
Q5BA81	63334.4	Acyl-CoA ligase easD OS=Emericella nidulans (strain FGSC A4 / ATCC 38163 / CBS 112.46 / NRRL 194 / M139) OX=227321 GN=easD PE=3 SV=1				3.94763	Cytoplasm
P56862;Q0CC19	63401	Sulfate adenylyltransferase OS=Aspergillus terreus OX=33178 GN=met3 PE=3 SV=1			1.83903		Cytoplasm
Q5AW04	63738.5	Protein bfr2 OS=Emericella nidulans (strain FGSC A4 / ATCC 38163 / CBS 112.46 / NRRL 194 / M139) OX=227321 GN=bfr2 PE=3 SV=1				5.06839	Nucleus
Q0CIL2	63756.8	Probable D-xylulose kinase A OS=Aspergillus terreus (strain NIH 2624 / FGSC A1156) OX=341663 GN=xkiA PE=2 SV=1	9.86705		3.57568		Cytoplasm
Q5B8G3	63771.8	Nucleolar protein 58 OS=Emericella nidulans (strain FGSC A4 / ATCC 38163 / CBS 112.46 / NRRL 194 / M139) OX=227321 GN=nop58 PE=3 SV=1			1.69748		Nucleus
Q4WLD5	63786.5	Nicotinic acid-CoA ligase pyr1 OS=Neosartorya fumigata (strain ATCC MYA-4609 / Af293 / CBS 101355 / FGSC A1100) OX=330879 GN=pyr1 PE=1 SV=1		21.9218			Cytoskeleton
Q4WE58	63839.2	tRNA (adenine(58)-N(1))-methyltransferase non-catalytic subunit trm6 OS=Neosartorya fumigata (strain ATCC MYA-4609 / Af293 / CBS 101355 / FGSC A1100) OX=330879 GN=trm6 PE=3 SV=1				2.89013	Nucleus
P81156	64136.4	Glucose oxidase OS=Penicillium amagasakiense OX=63559 PE=1 SV=1			2.88662	8.45324	Extracellular region
Q5BBL4	64183.1	Class E vacuolar protein-sorting machinery protein hse1 OS=Emericella nidulans (strain FGSC A4 / ATCC 38163 / CBS 112.46 / NRRL 194 / M139) OX=227321 GN=hse1 PE=3 SV=1				12.7472	Endosomes
Q5AXT6	64214.7	Peptidyl-prolyl cis-trans isomerase-like 2 OS=Emericella nidulans (strain FGSC A4 / ATCC 38163 / CBS 112.46 / NRRL 194 / M139) OX=227321 GN=cyp8 PE=3 SV=1				2.65446	Nucleus
Q5B748	64320	Cytosolic Fe-S cluster assembly factor nar1 OS=Emericella nidulans (strain FGSC A4 / ATCC 38163 / CBS 112.46 / NRRL 194 / M139) OX=227321 GN=nar1 PE=3 SV=2				9.22268	Cytosol
P51844	64356.4	Pyruvate decarboxylase OS=Aspergillus parasiticus OX=5067 GN=pdcA PE=3 SV=1				2.06787	Peroxisomes
Q5ASE0	64367.5	Probable D-xylulose kinase A OS=Emericella nidulans (strain FGSC A4 / ATCC 38163 / CBS 112.46 / NRRL 194 / M139) OX=227321 GN=xkiA PE=2 SV=1			3.00029	1.96868	Cytoplasm
K0E4E5	64398.3	Isopropyl malate synthase htyA OS=Aspergillus rugulosus OX=41736 GN=htyA PE=1 SV=1			1.50397		Cytoskeleton
B8NJG5	64503.4	Probable transcription factor lepB OS=Aspergillus flavus (strain ATCC 200026 / FGSC A1120 / NRRL 3357 / JCM 12722 / SRRC 167) OX=332952 GN=lepB PE=4 SV=1			2.05526		Nucleus
Q4WWN8;A1D858	64504.3	Sulfate adenylyltransferase OS=Neosartorya fumigata (strain ATCC MYA-4609 / Af293 / CBS 101355 / FGSC A1100) OX=330879 GN=met3 PE=3 SV=1				11.3193	Cytoplasm
B9WZX1;Q4WAW5	64525.5	Tryprostatin B 6-hydroxylase OS=Neosartorya fumigata OX=746128 GN=ftmP450-1 PE=1 SV=1			9.81973		Plasma membrane
A2Q9A9	64570.1	Cytosolic Fe-S cluster assembly factor nar1 OS=Aspergillus niger (strain CBS 513.88 / FGSC A1513) OX=425011 GN=nar1 PE=3 SV=1		4.87838			Cytoplasm
O74689	64640.5	Nuclear distribution protein nudE OS=Emericella nidulans (strain FGSC A4 / ATCC 38163 / CBS 112.46 / NRRL 194 / M139) OX=227321 GN=nudE PE=1 SV=1	1.83962				Cytoskeleton
P78581	64665.4	Tannase OS=Aspergillus oryzae (strain ATCC 42149 / RIB 40) OX=510516 GN=AO090103000074 PE=1 SV=1	3.01937				Extracellular region
Q0CZS8	64709.1	ATP-dependent RNA helicase has1 OS=Aspergillus terreus (strain NIH 2624 / FGSC A1156) OX=341663 GN=has1 PE=3 SV=1		3.85054	1.69396	5.09526	Nucleus
A5ABX6	64878.1	Eukaryotic translation initiation factor 3 subunit D OS=Aspergillus niger (strain CBS 513.88 / FGSC A1513) OX=425011 GN=An15g03780 PE=3 SV=1	2.4718		2.58609	6.49902	Cytoplasm
Q4WYN4	65039.6	Major facilitator coppper-regulated transporter crmC OS=Neosartorya fumigata (strain ATCC MYA-4609 / Af293 / CBS 101355 / FGSC A1100) OX=330879 GN=crmC PE=2 SV=1		2.63839			Plasma membrane
A1CIC2	65040.8	Cytosolic Fe-S cluster assembly factor nar1 OS=Aspergillus clavatus (strain ATCC 1007 / CBS 513.65 / DSM 816 / NCTC 3887 / NRRL 1) OX=344612 GN=nar1 PE=3 SV=1	4.59733		2.57549		Cytoskeleton
Q0CKB1	65049.3	Probable catabolite repression protein creC OS=Aspergillus terreus (strain NIH 2624 / FGSC A1156) OX=341663 GN=creC PE=3 SV=1				2.86466	Nucleus
Q5AU50	65203.8	Pre-mRNA-processing protein 45 OS=Emericella nidulans (strain FGSC A4 / ATCC 38163 / CBS 112.46 / NRRL 194 / M139) OX=227321 GN=prp45 PE=3 SV=1				2.59612	Nucleus
A1DI25;B0XU47;Q4X054	65240.5	Eukaryotic translation initiation factor 3 subunit D OS=Neosartorya fischeri (strain ATCC 1020 / DSM 3700 / CBS 544.65 / FGSC A1164 / JCM 1740 / NRRL 181 / WB 181) OX=331117 GN=NFIA_089900 PE=3 SV=1			1.62139		Cytoplasm
B0YA61;Q4WCL2	65453.9	Probable lysosomal cobalamin transporter OS=Neosartorya fumigata (strain CEA10 / CBS 144.89 / FGSC A1163) OX=451804 GN=AFUB_083530 PE=3 SV=1			3.64627		Lysosomes
Q4WJS2	65610.2	Protein vts1 OS=Neosartorya fumigata (strain ATCC MYA-4609 / Af293 / CBS 101355 / FGSC A1100) OX=330879 GN=vts1 PE=3 SV=2		1.58252			Cytoplasm
Q4WR83	65640	Acyl-CoA ligase sidI OS=Neosartorya fumigata (strain ATCC MYA-4609 / Af293 / CBS 101355 / FGSC A1100) OX=330879 GN=sidI PE=2 SV=1				1.82633	Peroxisomes
Q5BAP5	65668	Endo-1_3(4)-beta-glucanase xgeA OS=Emericella nidulans (strain FGSC A4 / ATCC 38163 / CBS 112.46 / NRRL 194 / M139) OX=227321 GN=xgeA PE=3 SV=1			4.55855		Plasma membrane
A2QGD9	65738	Putative lipase atg15 OS=Aspergillus niger (strain CBS 513.88 / FGSC A1513) OX=425011 GN=atg15 PE=3 SV=1				5.88617	Endosomes
P36914	65970	Glucoamylase OS=Aspergillus oryzae (strain ATCC 42149 / RIB 40) OX=510516 GN=glaA PE=2 SV=2	4.42169				Extracellular region
Q4WNY4	66011.1	SWR1-complex protein 4 OS=Neosartorya fumigata (strain ATCC MYA-4609 / Af293 / CBS 101355 / FGSC A1100) OX=330879 GN=swc4 PE=3 SV=1	1.53843				Nucleus
Q1ERI1	66032.8	Citrinin biosynthesis transcriptional activator ctnR OS=Monascus purpureus OX=5098 GN=ctnR PE=3 SV=1			3.78355		Nucleus
Q0C9B4	66102.2	Putative metallocarboxypeptidase ecm14 OS=Aspergillus terreus (strain NIH 2624 / FGSC A1156) OX=341663 GN=ecm14 PE=3 SV=1			3.41678		Vacuole
Q4WD48	66185.8	Aromatic hydroxylase fmpF OS=Neosartorya fumigata (strain ATCC MYA-4609 / Af293 / CBS 101355 / FGSC A1100) OX=330879 GN=fmpF PE=2 SV=1			2.33213		Extracellular region
B8N3N5;Q2UKS0	66209	Glutamyl-tRNA(Gln) amidotransferase subunit B_ mitochondrial OS=Aspergillus flavus (strain ATCC 200026 / FGSC A1120 / NRRL 3357 / JCM 12722 / SRRC 167) OX=332952 GN=AFLA_031190 PE=3 SV=1			9.40962		Mitochondria
Q5B4T5	66394.2	SWR1-complex protein 4 OS=Emericella nidulans (strain FGSC A4 / ATCC 38163 / CBS 112.46 / NRRL 194 / M139) OX=227321 GN=swc4 PE=3 SV=1			2.89115		Nucleus
A1CEK6	66432.8	Class E vacuolar protein-sorting machinery protein hse1 OS=Aspergillus clavatus (strain ATCC 1007 / CBS 513.65 / DSM 816 / NCTC 3887 / NRRL 1) OX=344612 GN=hse1 PE=3 SV=1	2.40632				Endosomes
A1C7M3	66450.5	Autophagy-related protein 22-1 OS=Aspergillus clavatus (strain ATCC 1007 / CBS 513.65 / DSM 816 / NCTC 3887 / NRRL 1) OX=344612 GN=atg22-1 PE=3 SV=1		2.04291			Vacuole
Q2TZ20	66500.4	Probable lysosomal cobalamin transporter OS=Aspergillus oryzae (strain ATCC 42149 / RIB 40) OX=510516 GN=AO090103000016 PE=3 SV=1			6.34406		Lysosomes
Q5B323	66528.2	Tyrosine-protein phosphatase cdcA OS=Emericella nidulans (strain FGSC A4 / ATCC 38163 / CBS 112.46 / NRRL 194 / M139) OX=227321 GN=cdcA PE=3 SV=1			3.11563		Nucleus
A1DHY9	66548.8	Probable endo-1_3(4)-beta-glucanase NFIA_089530 OS=Neosartorya fischeri (strain ATCC 1020 / DSM 3700 / CBS 544.65 / FGSC A1164 / JCM 1740 / NRRL 181 / WB 181) OX=331117 GN=NFIA_089530 PE=3 SV=1	3.71405				Plasma membrane
B8NM76	66555.7	ustiloxin B cluster transcription factor ustR OS=Aspergillus flavus (strain ATCC 200026 / FGSC A1120 / NRRL 3357 / JCM 12722 / SRRC 167) OX=332952 GN=ustR PE=3 SV=2				7.09011	Nucleus
A2QM49	66559.4	Bifunctional lycopene cyclase/phytoene synthase OS=Aspergillus niger (strain CBS 513.88 / FGSC A1513) OX=425011 GN=An07g00800 PE=3 SV=1		1.64229		3.83506	Plasma membrane
Q4WRQ4	66592	Major facilitator superfamily multidrug transporter mfsB OS=Neosartorya fumigata (strain ATCC MYA-4609 / Af293 / CBS 101355 / FGSC A1100) OX=330879 GN=mfsB PE=2 SV=1				2.44887	Plasma membrane
Q870L2	66615.9	Siderophore iron transporter mirB OS=Emericella nidulans (strain FGSC A4 / ATCC 38163 / CBS 112.46 / NRRL 194 / M139) OX=227321 GN=mirB PE=3 SV=1				25.0189	Plasma membrane
B0Y7I1;Q4WN21	66616.3	Probable HECT-type ubiquitin ligase-interacting protein creD OS=Neosartorya fumigata (strain CEA10 / CBS 144.89 / FGSC A1163) OX=451804 GN=creD PE=3 SV=2		2.94509			Plasma membrane
Q8X1Z7	66653.4	Siderophore iron transporter mirA OS=Emericella nidulans (strain FGSC A4 / ATCC 38163 / CBS 112.46 / NRRL 194 / M139) OX=227321 GN=mirA PE=3 SV=1				79.7497	Plasma membrane
Q4WH97	66674.7	Autophagy-related protein 22-1 OS=Neosartorya fumigata (strain ATCC MYA-4609 / Af293 / CBS 101355 / FGSC A1100) OX=330879 GN=atg22-1 PE=3 SV=1				22.7655	Vacuole
A1DMI8	66755.5	Probable catabolite repression protein creC OS=Neosartorya fischeri (strain ATCC 1020 / DSM 3700 / CBS 544.65 / FGSC A1164 / JCM 1740 / NRRL 181 / WB 181) OX=331117 GN=creC PE=3 SV=1				12.2871	Nucleus
Q4WDF1;A2QC41;Q2UF93;Q4X0I5	66873.2	Enhancer of polycomb-like protein 1 OS=Neosartorya fumigata (strain ATCC MYA-4609 / Af293 / CBS 101355 / FGSC A1100) OX=330879 GN=epl1 PE=3 SV=1	2.27008			6.60321	Nucleus
Q2UUN6	67028.5	ATP-dependent RNA helicase has1 OS=Aspergillus oryzae (strain ATCC 42149 / RIB 40) OX=510516 GN=has1 PE=3 SV=2			3.34084	2.92288	Nucleus
A1D6S8	67167.2	Glutamyl-tRNA(Gln) amidotransferase subunit B_ mitochondrial OS=Neosartorya fischeri (strain ATCC 1020 / DSM 3700 / CBS 544.65 / FGSC A1164 / JCM 1740 / NRRL 181 / WB 181) OX=331117 GN=NFIA_065860 PE=3 SV=1		1.83583			Mitochondrion
Q4WGE2	67226.3	Siderochrome iron transporter 2 OS=Neosartorya fumigata (strain ATCC MYA-4609 / Af293 / CBS 101355 / FGSC A1100) OX=330879 GN=sit2 PE=1 SV=1				2.11278	Plasma membrane
A0A142PTM2	67267.3	Dehydrogenase mpl7 OS=Monascus purpureus OX=5098 GN=mpl7 PE=1 SV=1	34.1593				Peroxisomes
Q12546	67552.8	Acid phosphatase OS=Aspergillus ficuum OX=5058 GN=aphA PE=1 SV=1			4.34625	3.19943	Extracellular Region
Q2TZG4	67567.7	Polyadenylation factor subunit 2 OS=Aspergillus oryzae (strain ATCC 42149 / RIB 40) OX=510516 GN=pfs2 PE=3 SV=1			8.66072		Nucleus
B0XZV8;P0C958	67872.8	Lysophospholipase 3 OS=Neosartorya fumigata (strain CEA10 / CBS 144.89 / FGSC A1163) OX=451804 GN=plb3 PE=1 SV=1			1.64132		Plasma membrane
Q4WWN2	67935.2	Palmitoyltransferase erf2 OS=Neosartorya fumigata (strain ATCC MYA-4609 / Af293 / CBS 101355 / FGSC A1100) OX=330879 GN=erf2 PE=3 SV=1			1.70339		Endoplasmic reticulum
Q4WVT3	68012.5	Probable transporter mch1 OS=Neosartorya fumigata (strain ATCC MYA-4609 / Af293 / CBS 101355 / FGSC A1100) OX=330879 GN=mch1 PE=3 SV=1			2.43414		Vacuole
A2QGR5	68261.9	Probable Xaa-Pro aminopeptidase P OS=Aspergillus niger (strain CBS 513.88 / FGSC A1513) OX=425011 GN=ampp PE=3 SV=1	1.79297		3.98348		cytoplasm
Q5BBY1	68337	ATP-dependent RNA helicase has1 OS=Emericella nidulans (strain FGSC A4 / ATCC 38163 / CBS 112.46 / NRRL 194 / M139) OX=227321 GN=has1 PE=3 SV=1	1.81604				Nucleus
B8NKS1;Q2U685	68425.2	MYND-type zinc finger protein samB OS=Aspergillus flavus (strain ATCC 200026 / FGSC A1120 / NRRL 3357 / JCM 12722 / SRRC 167) OX=332952 GN=samB PE=3 SV=1			23.3418	50.5947	Cytoplasm
Q5B2E9	68480	Pyranose 2-oxidase OS=Emericella nidulans (strain FGSC A4 / ATCC 38163 / CBS 112.46 / NRRL 194 / M139) OX=227321 GN=p2ox PE=3 SV=2			1.99086		Nucleus
Q5BCC6	68591.1	Beta-glucosidase C OS=Emericella nidulans (strain FGSC A4 / ATCC 38163 / CBS 112.46 / NRRL 194 / M139) OX=227321 GN=bglC PE=1 SV=1			2.03712	4.64813	Extracellular Region
B8N9M5;Q2UGP9	68730.2	Restriction of telomere capping protein 5 OS=Aspergillus flavus (strain ATCC 200026 / FGSC A1120 / NRRL 3357 / JCM 12722 / SRRC 167) OX=332952 GN=rtc5 PE=3 SV=1				5.08132	cytoplasm
Q4X1V0	68763.2	Nuclear distribution protein nudE homolog 1 OS=Neosartorya fumigata (strain ATCC MYA-4609 / Af293 / CBS 101355 / FGSC A1100) OX=330879 GN=nde1 PE=3 SV=1				65.5362	Cytoskeleton
C8V3N0	68861.7	Aspercryptin biosynthesis cluster-specific transcription regulator atnN OS=Emericella nidulans (strain FGSC A4 / ATCC 38163 / CBS 112.46 / NRRL 194 / M139) OX=227321 GN=atnN PE=3 SV=1	3.41892	1.70898			Nucleus
Q4WAY8	68886.8	C6 finger transcription factor fumR OS=Neosartorya fumigata (strain ATCC MYA-4609 / Af293 / CBS 101355 / FGSC A1100) OX=330879 GN=fumR PE=1 SV=1		1.61935	5.94332	9.62269	Nucleus
A2QCW6	68912.9	ATP-dependent RNA helicase dbp9 OS=Aspergillus niger (strain CBS 513.88 / FGSC A1513) OX=425011 GN=dbp9 PE=3 SV=1				2.76111	Nucleus
Q4X0X6	69017.5	Exocyst complex protein exo70 OS=Neosartorya fumigata (strain ATCC MYA-4609 / Af293 / CBS 101355 / FGSC A1100) OX=330879 GN=exo70 PE=3 SV=1			5.56887		Cytoplasm
Q2UST1	69250.9	ATP-dependent RNA helicase mss116_ mitochondrial OS=Aspergillus oryzae (strain ATCC 42149 / RIB 40) OX=510516 GN=mss116 PE=3 SV=1			3.48484		Mitochondrion
A1CQL5	69275.5	Pheromone-processing carboxypeptidase kex1 OS=Aspergillus clavatus (strain ATCC 1007 / CBS 513.65 / DSM 816 / NCTC 3887 / NRRL 1) OX=344612 GN=kex1 PE=3 SV=1				1.71074	Golgi apparatus
Q5B430	69305	Glucan endo-1_3-beta-glucosidase btgC OS=Emericella nidulans (strain FGSC A4 / ATCC 38163 / CBS 112.46 / NRRL 194 / M139) OX=227321 GN=btgC PE=2 SV=1			1.57086	4.46159	Plasma membrane
Q9UW13	69365.9	pH-response regulator protein palF/RIM8 OS=Candida albicans (strain SC5314 / ATCC MYA-2876) OX=237561 GN=RIM8 PE=2 SV=2			4.96585	9.78914	Cytosol
Q0CY48	69399.4	ATP-dependent RNA helicase dbp9 OS=Aspergillus terreus (strain NIH 2624 / FGSC A1156) OX=341663 GN=dbp9 PE=3 SV=2	3.50438				Nucleus
A1CEH4	69488	Vacuolar fusion protein mon1 OS=Aspergillus clavatus (strain ATCC 1007 / CBS 513.65 / DSM 816 / NCTC 3887 / NRRL 1) OX=344612 GN=mon1 PE=3 SV=1		83.6102			Endosomes
B8NC58;Q2U1G7	69586.9	Extracellular metalloproteinase mep OS=Aspergillus flavus (strain ATCC 200026 / FGSC A1120 / NRRL 3357 / JCM 12722 / SRRC 167) OX=332952 GN=mep PE=3 SV=1	3.25505				Extracellular Region
A1C7F7	69872.9	ATP-dependent RNA helicase dbp9 OS=Aspergillus clavatus (strain ATCC 1007 / CBS 513.65 / DSM 816 / NCTC 3887 / NRRL 1) OX=344612 GN=dbp9 PE=3 SV=1	2.07737		4.89258		Nucleus
P0CAQ1	69902.5	Ubiquitin carboxyl-terminal hydrolase 16 OS=Emericella nidulans (strain FGSC A4 / ATCC 38163 / CBS 112.46 / NRRL 194 / M139) OX=227321 GN=ubp16 PE=3 SV=1	3.15073				Cytosol
Q4X265;A1DG68	70064.4	Leucine aminopeptidase 2 OS=Neosartorya fumigata (strain ATCC MYA-4609 / Af293 / CBS 101355 / FGSC A1100) OX=330879 GN=AFUA_2G07520 PE=3 SV=1			5.16342		Nucleus
Q4WZ61	70068.5	FAD-linked oxidoreductase easE OS=Neosartorya fumigata (strain ATCC MYA-4609 / Af293 / CBS 101355 / FGSC A1100) OX=330879 GN=easE PE=2 SV=1	1.75364		1.79555		Extracellular Region
Q2TZH2	70081	ATP-dependent RNA helicase mrh4_ mitochondrial OS=Aspergillus oryzae (strain ATCC 42149 / RIB 40) OX=510516 GN=mrh4 PE=3 SV=1			1.6533		Mitochondrion
Q5B2V1	70087.7	Heat shock 70 kDa protein OS=Emericella nidulans (strain FGSC A4 / ATCC 38163 / CBS 112.46 / NRRL 194 / M139) OX=227321 GN=hsp70 PE=1 SV=1			3.05517		Cytosol
A1CHC0	70156.8	Restriction of telomere capping protein 5 OS=Aspergillus clavatus (strain ATCC 1007 / CBS 513.65 / DSM 816 / NCTC 3887 / NRRL 1) OX=344612 GN=rtc5 PE=3 SV=1		2.12436			Cytoplasm
A2QI68	70256.4	MICOS complex subunit mic60 OS=Aspergillus niger (strain CBS 513.88 / FGSC A1513) OX=425011 GN=mic60 PE=3 SV=1				2.80445	Mitochondrion
Q70DX9	70476.8	Tripeptidyl-peptidase sed1 OS=Neosartorya fumigata (strain ATCC MYA-4609 / Af293 / CBS 101355 / FGSC A1100) OX=330879 GN=sed1 PE=1 SV=1		1.76714	1.89425		Extracellular Region
A1DGF2	70625.5	ATP-dependent RNA helicase mrh4_ mitochondrial OS=Neosartorya fischeri (strain ATCC 1020 / DSM 3700 / CBS 544.65 / FGSC A1164 / JCM 1740 / NRRL 181 / WB 181) OX=331117 GN=mrh4 PE=3 SV=1		1.67455			Mitochondrion
Q4WN24;Q2UM43	70766.3	Mitochondrial Rho GTPase 1 OS=Neosartorya fumigata (strain ATCC MYA-4609 / Af293 / CBS 101355 / FGSC A1100) OX=330879 GN=gem1 PE=3 SV=1		2.36057			Mitochondrion
A1CSI2	70769.1	Leucine aminopeptidase 2 OS=Aspergillus clavatus (strain ATCC 1007 / CBS 513.65 / DSM 816 / NCTC 3887 / NRRL 1) OX=344612 GN=ACLA_079530 PE=3 SV=1		3.58745			Nucleus
Q0CCR9	70853.5	Pheromone-processing carboxypeptidase kex1 OS=Aspergillus terreus (strain NIH 2624 / FGSC A1156) OX=341663 GN=kex1 PE=3 SV=1			6.4294	2.72633	Golgi apparatus
Q8NK92	71128.8	Aorsin OS=Aspergillus oryzae (strain ATCC 42149 / RIB 40) OX=510516 GN=aorO PE=1 SV=2				19.6092	Extracellular Region
Q9UGH3	71135.5	Solute carrier family 23 member 2 OS=Homo sapiens OX=9606 GN=SLC23A2 PE=1 SV=1		4.33129			Plasma membrane
Q5B8F4	71233.9	ATP-dependent rRNA helicase spb4 OS=Emericella nidulans (strain FGSC A4 / ATCC 38163 / CBS 112.46 / NRRL 194 / M139) OX=227321 GN=spb4 PE=3 SV=1				17.0092	Nucleus
Q5BDJ6	71269.5	Pheromone-processing carboxypeptidase kex1 OS=Emericella nidulans (strain FGSC A4 / ATCC 38163 / CBS 112.46 / NRRL 194 / M139) OX=227321 GN=kex1 PE=3 SV=2			2.09911		Golgi apparatus
Q2U6Q1	71296.3	tRNA (uracil-O(2)-)-methyltransferase OS=Aspergillus oryzae (strain ATCC 42149 / RIB 40) OX=510516 GN=trm44 PE=3 SV=1	1.63098	2.33007			Cytoplasm
Q9HFB3;Q96UW0	71314.6	pH-response transcription factor pacC/RIM101 OS=Aspergillus oryzae (strain ATCC 42149 / RIB 40) OX=510516 GN=pacC PE=3 SV=2	10.9919				Nucleus
Q0CVX4	71534.3	Probable alpha-galactosidase D OS=Aspergillus terreus (strain NIH 2624 / FGSC A1156) OX=341663 GN=aglD PE=3 SV=2			4.86925		Extracellular Region
A2QE29	71703	ATP-dependent rRNA helicase spb4 OS=Aspergillus niger (strain CBS 513.88 / FGSC A1513) OX=425011 GN=spb4 PE=3 SV=2	1.95058				Nucleus
A1CLT5	71732.5	Mediator of RNA polymerase II transcription subunit 17 OS=Aspergillus clavatus (strain ATCC 1007 / CBS 513.65 / DSM 816 / NCTC 3887 / NRRL 1) OX=344612 GN=srb4 PE=3 SV=1	1.61536				Nucleus
Q2UBZ5;Q0CQF3;Q4WYJ7	71752.1	ATP-dependent rRNA helicase spb4 OS=Aspergillus oryzae (strain ATCC 42149 / RIB 40) OX=510516 GN=spb4 PE=3 SV=1			2.2328		Nucleus
Q5B8A6	71929.3	Mediator of RNA polymerase II transcription subunit 17 OS=Emericella nidulans (strain FGSC A4 / ATCC 38163 / CBS 112.46 / NRRL 194 / M139) OX=227321 GN=srb4 PE=3 SV=1		2.39694	4.75487		Nucleus
A2QUS7	71977.4	DNA-directed RNA polymerase III subunit rpc3 OS=Aspergillus niger (strain CBS 513.88 / FGSC A1513) OX=425011 GN=rpc82 PE=3 SV=1	1.90537				Nucleus
Q2UGK3	72115.2	ATP-dependent RNA helicase ded1 OS=Aspergillus oryzae (strain ATCC 42149 / RIB 40) OX=510516 GN=ded1 PE=3 SV=1		4.60122			Cytoplasm
Q5B0C0	72372	Heat shock 70 kDa protein OS=Emericella nidulans (strain FGSC A4 / ATCC 38163 / CBS 112.46 / NRRL 194 / M139) OX=227321 GN=AN6010 PE=1 SV=1			2.03416		Mitochondrion
A1CXK7;Q4WP13	72421.9	ATP-dependent RNA helicase ded1 OS=Neosartorya fischeri (strain ATCC 1020 / DSM 3700 / CBS 544.65 / FGSC A1164 / JCM 1740 / NRRL 181 / WB 181) OX=331117 GN=ded1 PE=3 SV=1			3.40449	5.17815	cytoplasm
A1CV59	72429.4	Mediator of RNA polymerase II transcription subunit 17 OS=Neosartorya fischeri (strain ATCC 1020 / DSM 3700 / CBS 544.65 / FGSC A1164 / JCM 1740 / NRRL 181 / WB 181) OX=331117 GN=srb4 PE=3 SV=1			2.90512		Nucleus
Q5AZY3	72546	Histone-lysine N-methyltransferase set9 OS=Emericella nidulans (strain FGSC A4 / ATCC 38163 / CBS 112.46 / NRRL 194 / M139) OX=227321 GN=set9 PE=3 SV=1			1.82993		Nucleus
Q0D0A1	72839.6	PAN2-PAN3 deadenylation complex subunit PAN3 OS=Aspergillus terreus (strain NIH 2624 / FGSC A1156) OX=341663 GN=pan3 PE=3 SV=2				2.50308	Cytoplasm
A1CBP8	72868.6	Mitochondrial division protein 1 OS=Aspergillus clavatus (strain ATCC 1007 / CBS 513.65 / DSM 816 / NCTC 3887 / NRRL 1) OX=344612 GN=mdv1 PE=3 SV=1	5.40419			1.77238	Mitochondrion
Q4X0C2	72941.7	ATP-dependent RNA helicase dbp9 OS=Neosartorya fumigata (strain ATCC MYA-4609 / Af293 / CBS 101355 / FGSC A1100) OX=330879 GN=dbp9 PE=3 SV=1		2.15402			Nucleus
B0Y3V7;Q4WUD3	72964.8	Probable Xaa-Pro aminopeptidase P OS=Neosartorya fumigata (strain CEA10 / CBS 144.89 / FGSC A1163) OX=451804 GN=ampp PE=3 SV=1			4.22301	71.4929	Mitochondrion
Q5XL24	73073.9	pH-response transcription factor pacC/RIM101 OS=Aspergillus giganteus OX=5060 GN=pacC PE=3 SV=1		2.77674	5.26612		Nucleus
B8NTP7;Q2U492	73142.5	Probable glucan endo-1_3-beta-glucosidase btgC OS=Aspergillus flavus (strain ATCC 200026 / FGSC A1120 / NRRL 3357 / JCM 12722 / SRRC 167) OX=332952 GN=btgC PE=3 SV=2			5.88404		Plasma membrane
Q6QU67;P11628	73300.5	NADH-ubiquinone oxidoreductase chain 5 OS=Aspergillus niger OX=5061 GN=nad5 PE=3 SV=1				11.6001	Mitochondrion
P59769;P83616;P83617	73515.9	Endoplasmic reticulum chaperone BiP OS=Aspergillus awamori OX=105351 GN=bipA PE=2 SV=1	4.48658		2.85447		Endoplasmic reticulum
Q5BFB1	73561.5	PAN2-PAN3 deadenylation complex subunit pan3 OS=Emericella nidulans (strain FGSC A4 / ATCC 38163 / CBS 112.46 / NRRL 194 / M139) OX=227321 GN=pan3 PE=3 SV=3		1.77566			Cytoplasm
Q5B681	73612.2	Probable beta-glucosidase N OS=Emericella nidulans (strain FGSC A4 / ATCC 38163 / CBS 112.46 / NRRL 194 / M139) OX=227321 GN=bglN PE=3 SV=1			1.69373		Extracellular Region
A7BJS7	73625	Transcriptional activator of proteases prtT OS=Aspergillus oryzae (strain ATCC 42149 / RIB 40) OX=510516 GN=prtT PE=3 SV=1			4.43237		Nucleus
A1D4X8	73646.3	Nuclear protein localization protein 4 OS=Neosartorya fischeri (strain ATCC 1020 / DSM 3700 / CBS 544.65 / FGSC A1164 / JCM 1740 / NRRL 181 / WB 181) OX=331117 GN=npl4 PE=3 SV=1	2.49327		1.54444		Nucleus
Q0C7K7	73741.5	Probable rhamnogalacturonate lyase B OS=Aspergillus terreus (strain NIH 2624 / FGSC A1156) OX=341663 GN=rglB PE=3 SV=1				3.40398	Extracellular Region
Q4WU59	73781.2	NADPH-dependent diflavin oxidoreductase 1 OS=Neosartorya fumigata (strain ATCC MYA-4609 / Af293 / CBS 101355 / FGSC A1100) OX=330879 GN=tah18 PE=3 SV=1			3.83738		Mitochondrion
Q4WZB4	73844.7	Multicopper oxidase abr1 OS=Neosartorya fumigata (strain ATCC MYA-4609 / Af293 / CBS 101355 / FGSC A1100) OX=330879 GN=abr1 PE=2 SV=2			3.31689		Extracellular Region
D4CZZ6	73855.7	C6 finger domain transcription factor nscR OS=Trichophyton verrucosum (strain HKI 0517) OX=663202 GN=nscR PE=3 SV=1			3.1833		Nucleus
Q4WRP2;Q4WU00	74216.6	ATP-dependent RNA helicase mss116_ mitochondrial OS=Neosartorya fumigata (strain ATCC MYA-4609 / Af293 / CBS 101355 / FGSC A1100) OX=330879 GN=mss116 PE=3 SV=1			7.48083		Mitochondrion
Q5B8L0	74231.3	Transcriptional activator of proteases prtT OS=Emericella nidulans (strain FGSC A4 / ATCC 38163 / CBS 112.46 / NRRL 194 / M139) OX=227321 GN=prtT PE=3 SV=1	4.21668		2.99453		Nucleus
Q5AWA2	74275.6	Ubiquitin-like modifier-activating enzyme atg7 OS=Emericella nidulans (strain FGSC A4 / ATCC 38163 / CBS 112.46 / NRRL 194 / M139) OX=227321 GN=atg7 PE=3 SV=2			4.58912		Cytoplasm
A1CAI0	74372.9	Probable glucan endo-1_3-beta-glucosidase btgC OS=Aspergillus clavatus (strain ATCC 1007 / CBS 513.65 / DSM 816 / NCTC 3887 / NRRL 1) OX=344612 GN=btgC PE=3 SV=1				1.88842	Plasma membrane
Q2U3T4	74374.2	Translation factor guf1_ mitochondrial OS=Aspergillus oryzae (strain ATCC 42149 / RIB 40) OX=510516 GN=guf1 PE=3 SV=1	2.38714				Mitochondrion
P16928	74622.7	Acetyl-coenzyme A synthetase OS=Emericella nidulans (strain FGSC A4 / ATCC 38163 / CBS 112.46 / NRRL 194 / M139) OX=227321 GN=facA PE=2 SV=2			1.61425	10.2221	Extracellular Region
K0DZ91	74786.6	Echinocandin B biosynthetic cluster protein J OS=Aspergillus rugulosus OX=41736 GN=ecdJ PE=1 SV=1		2.00905		3.02865	Nucleus
Q5BEK1	75075.5	Asperfuranone cluster transcription factor afoA OS=Emericella nidulans (strain FGSC A4 / ATCC 38163 / CBS 112.46 / NRRL 194 / M139) OX=227321 GN=afoA PE=1 SV=1			4.22003		Nucleus
A1CIJ6	75616.7	Glucose-repressible alcohol dehydrogenase transcriptional effector OS=Aspergillus clavatus (strain ATCC 1007 / CBS 513.65 / DSM 816 / NCTC 3887 / NRRL 1) OX=344612 GN=ccr4 PE=3 SV=1				15.7723	Nucleus
Q5BCB9	75788.3	GPI mannosyltransferase 3 OS=Emericella nidulans (strain FGSC A4 / ATCC 38163 / CBS 112.46 / NRRL 194 / M139) OX=227321 GN=gpi10 PE=3 SV=1	2.49978			30.1866	Endoplasmic reticulum
Q12556	75873.5	Copper amine oxidase 1 OS=Aspergillus niger OX=5061 GN=AO-I PE=1 SV=2	11.825		1.931		Peroxisomes
Q5AW62	76593.6	Transcription activator of gluconeogenesis acuK OS=Emericella nidulans (strain FGSC A4 / ATCC 38163 / CBS 112.46 / NRRL 194 / M139) OX=227321 GN=acuK PE=3 SV=1			2.75804		Nucleus
A2QJZ0	76664.5	ATPase synthesis protein 25_ mitochondrial OS=Aspergillus niger (strain CBS 513.88 / FGSC A1513) OX=425011 GN=atp25 PE=3 SV=1			1.89529	1.93036	Mitochondrion
Q0CT27	76742	Glucose-repressible alcohol dehydrogenase transcriptional effector OS=Aspergillus terreus (strain NIH 2624 / FGSC A1156) OX=341663 GN=ccr4 PE=3 SV=1			16.8177	7.18118	Nucleus
Q5B8L2	76754.7	Crossover junction endonuclease mus81 OS=Emericella nidulans (strain FGSC A4 / ATCC 38163 / CBS 112.46 / NRRL 194 / M139) OX=227321 GN=mus81 PE=3 SV=1			3.89215		Nucleus
A2QWA2	76935.1	Vacuolar protein sorting-associated protein 27 OS=Aspergillus niger (strain CBS 513.88 / FGSC A1513) OX=425011 GN=vps27 PE=3 SV=1	5.81864				Endosomes
Q0CMM0	76949.6	NADPH--cytochrome P450 reductase OS=Aspergillus terreus (strain NIH 2624 / FGSC A1156) OX=341663 GN=cprA PE=3 SV=1	1.64544		14.8207		Endoplasmic reticulum
S3DQQ3	76958.8	Pneumocandin biosynthesis cluster protein B OS=Glarea lozoyensis (strain ATCC 20868 / MF5171) OX=1116229 GN=gloB PE=1 SV=1				1.61881	Nucleus
Q00659	77268.9	Probable E3 ubiquitin ligase complex SCF subunit sconB OS=Emericella nidulans (strain FGSC A4 / ATCC 38163 / CBS 112.46 / NRRL 194 / M139) OX=227321 GN=sconB PE=3 SV=2			2.31393	1.53142	Nucleus
C8VCP9	77493.7	ATPase synthesis protein 25_ mitochondrial OS=Emericella nidulans (strain FGSC A4 / ATCC 38163 / CBS 112.46 / NRRL 194 / M139) OX=227321 GN=atp25 PE=3 SV=1	2.90258				Mitochondrion
A2QQE8	77667.2	Inclusion body clearance protein iml2 OS=Aspergillus niger (strain CBS 513.88 / FGSC A1513) OX=425011 GN=iml2 PE=3 SV=1				2.25091	Nucleus
Q5B0R3	77942.3	Amino-acid acetyltransferase_ mitochondrial OS=Emericella nidulans (strain FGSC A4 / ATCC 38163 / CBS 112.46 / NRRL 194 / M139) OX=227321 GN=arg2 PE=3 SV=2				28.0574	Mitochondrion
A1CEK1	78555.3	Vacuolar protein sorting-associated protein 27 OS=Aspergillus clavatus (strain ATCC 1007 / CBS 513.65 / DSM 816 / NCTC 3887 / NRRL 1) OX=344612 GN=vps27 PE=3 SV=1				6.3793	Endosomes
Q4X0N1	78784.4	Transcriptional activator ptaB OS=Neosartorya fumigata (strain ATCC MYA-4609 / Af293 / CBS 101355 / FGSC A1100) OX=330879 GN=ptaB PE=1 SV=1		3.10656			Nucleus
B0YB65;Q4WGT3	78810.5	Probable beta-glucosidase L OS=Neosartorya fumigata (strain CEA10 / CBS 144.89 / FGSC A1163) OX=451804 GN=bglL PE=3 SV=1		1.65849			Extracellular Region
Q96VA4	78922.3	1_4-alpha-glucan-branching enzyme OS=Aspergillus oryzae (strain ATCC 42149 / RIB 40) OX=510516 GN=gbeA PE=2 SV=1	2.60016		1.94846		cytoplasm
Q2UJS0	79096.7	Plasma membrane fusion protein prm1 OS=Aspergillus oryzae (strain ATCC 42149 / RIB 40) OX=510516 GN=prm1 PE=3 SV=1			2.43429	3.83454	Plasma membrane
Q0CQS4	79126.4	Plasma membrane fusion protein prm1 OS=Aspergillus terreus (strain NIH 2624 / FGSC A1156) OX=341663 GN=prm1 PE=3 SV=1		1.63381	1.92059	2.99504	Plasma membrane
A2Q848	79168.9	Polyadenylate-binding protein_ cytoplasmic and nuclear OS=Aspergillus niger (strain CBS 513.88 / FGSC A1513) OX=425011 GN=pab1 PE=3 SV=1			2.07137		Nucleus
Q5BBK9	79172.8	Vacuolar protein sorting-associated protein 27 OS=Emericella nidulans (strain FGSC A4 / ATCC 38163 / CBS 112.46 / NRRL 194 / M139) OX=227321 GN=vps27 PE=3 SV=1	2.98144				Endosomes
P38093	79198.1	Developmental regulator flbA OS=Emericella nidulans (strain FGSC A4 / ATCC 38163 / CBS 112.46 / NRRL 194 / M139) OX=227321 GN=flbA PE=2 SV=1			2.93012		Nucleus
Q4WZJ2;B0XVA3	79219.2	ATPase synthesis protein 25_ mitochondrial OS=Neosartorya fumigata (strain ATCC MYA-4609 / Af293 / CBS 101355 / FGSC A1100) OX=330879 GN=atp25 PE=3 SV=1			2.08071		Mitochondrion
P78619	79377.5	Catalase B OS=Emericella nidulans (strain FGSC A4 / ATCC 38163 / CBS 112.46 / NRRL 194 / M139) OX=227321 GN=catB PE=2 SV=2			2.46849		Cytosol
Q5B630	79549.4	Polyadenylate-binding protein_ cytoplasmic and nuclear OS=Emericella nidulans (strain FGSC A4 / ATCC 38163 / CBS 112.46 / NRRL 194 / M139) OX=227321 GN=pab1 PE=2 SV=2				5.50616	Nucleus
Q0C8V9	79683.8	Probable dipeptidyl-peptidase 5 OS=Aspergillus terreus (strain NIH 2624 / FGSC A1156) OX=341663 GN=dpp5 PE=3 SV=1	8.95506				Extracellular Region
Q4WHN8	79773.2	Vacuolar protein sorting-associated protein 27 OS=Neosartorya fumigata (strain ATCC MYA-4609 / Af293 / CBS 101355 / FGSC A1100) OX=330879 GN=vps27 PE=3 SV=1	11.3055		3.92352		Endosomes
Q5BDM6	79773.8	U3 small nucleolar RNA-associated protein 25 OS=Emericella nidulans (strain FGSC A4 / ATCC 38163 / CBS 112.46 / NRRL 194 / M139) OX=227321 GN=utp25 PE=3 SV=2			2.56391		Nucleus
B0XRV0;P0C959	79800.1	Dipeptidyl-peptidase 5 OS=Neosartorya fumigata (strain CEA10 / CBS 144.89 / FGSC A1163) OX=451804 GN=AFUB_024920 PE=1 SV=1		1.63448	1.82363		Extracellular Region
Q5B1G6	80382	Plasma membrane fusion protein prm1 OS=Emericella nidulans (strain FGSC A4 / ATCC 38163 / CBS 112.46 / NRRL 194 / M139) OX=227321 GN=prm1 PE=3 SV=1				3.39488	Plasma membrane
B8N0F0	80411.7	C6 transcription factor asaR OS=Aspergillus flavus (strain ATCC 200026 / FGSC A1120 / NRRL 3357 / JCM 12722 / SRRC 167) OX=332952 GN=asaR PE=2 SV=1			7.99056		Nucleus
Q0CEF5;Q9UUZ4	80493.1	Probable alpha-galactosidase G OS=Aspergillus terreus (strain NIH 2624 / FGSC A1156) OX=341663 GN=aglG PE=3 SV=1				17.8207	Extracellular Region
Q2UQW3	80590.7	ATP-dependent RNA helicase rok1 OS=Aspergillus oryzae (strain ATCC 42149 / RIB 40) OX=510516 GN=rok1 PE=3 SV=1			1.98078		Nucleus
B8NGT5;Q2UFN8	80733.9	Probable E3 ubiquitin ligase complex SCF subunit sconB OS=Aspergillus flavus (strain ATCC 200026 / FGSC A1120 / NRRL 3357 / JCM 12722 / SRRC 167) OX=332952 GN=sconB PE=3 SV=1			3.40352	4.58264	Nucleus
A2QAB5	80791.6	ATP-dependent RNA helicase rok1 OS=Aspergillus niger (strain CBS 513.88 / FGSC A1513) OX=425011 GN=rok1 PE=3 SV=2				4.30395	Nucleus
Q4WLN7	80830.7	Iron-sulfur clusters transporter atm1_ mitochondrial OS=Neosartorya fumigata (strain ATCC MYA-4609 / Af293 / CBS 101355 / FGSC A1100) OX=330879 GN=atm1 PE=3 SV=1	1.73243				Mitochondrion
Q5ARP5	80910.2	Probable alpha-galactosidase G OS=Emericella nidulans (strain FGSC A4 / ATCC 38163 / CBS 112.46 / NRRL 194 / M139) OX=227321 GN=aglG PE=2 SV=1			6.2098		Extracellular Region
A2QJ14	80988.5	Plasma membrane fusion protein prm1 OS=Aspergillus niger (strain CBS 513.88 / FGSC A1513) OX=425011 GN=prm1 PE=3 SV=1	2.87139				Plasma membrane
A2QPK4	81080.2	Probable beta-glucosidase D OS=Aspergillus niger (strain CBS 513.88 / FGSC A1513) OX=425011 GN=bglD PE=3 SV=2	1.9362	4.17878			Extracellular Region
A1D345	81108.8	Inclusion body clearance protein iml2 OS=Neosartorya fischeri (strain ATCC 1020 / DSM 3700 / CBS 544.65 / FGSC A1164 / JCM 1740 / NRRL 181 / WB 181) OX=331117 GN=iml2 PE=3 SV=1				3.31677	Nucleus
Q2U587	81136.6	ATP-dependent DNA helicase chl1 OS=Aspergillus oryzae (strain ATCC 42149 / RIB 40) OX=510516 GN=chl1 PE=3 SV=1			3.22889	1.81711	Nucleus
Q0CD12	81504.1	Catalase-peroxidase OS=Aspergillus terreus (strain NIH 2624 / FGSC A1156) OX=341663 GN=katG PE=3 SV=1				2.62201	Cytoplasm
Q0CCM6	81518.6	U3 small nucleolar RNA-associated protein 25 OS=Aspergillus terreus (strain NIH 2624 / FGSC A1156) OX=341663 GN=utp25 PE=3 SV=1			2.71708		Nucleus
Q5BET6	81664.7	ATP-dependent RNA helicase rok1 OS=Emericella nidulans (strain FGSC A4 / ATCC 38163 / CBS 112.46 / NRRL 194 / M139) OX=227321 GN=rok1 PE=3 SV=1				2.2192	Nucleus
Q5B4H8	81788.9	ATP-dependent DNA helicase II subunit 2 OS=Emericella nidulans (strain FGSC A4 / ATCC 38163 / CBS 112.46 / NRRL 194 / M139) OX=227321 GN=ku80 PE=3 SV=1		1.71703			Nucleus
A2QQ09	81806.6	U3 small nucleolar RNA-associated protein 25 OS=Aspergillus niger (strain CBS 513.88 / FGSC A1513) OX=425011 GN=utp25 PE=3 SV=1		1.52505			Nucleus
C8V7C6	82009.9	Conserved oligomeric Golgi complex subunit 6 OS=Emericella nidulans (strain FGSC A4 / ATCC 38163 / CBS 112.46 / NRRL 194 / M139) OX=227321 GN=cog6 PE=3 SV=1	1.9787		4.52441		Golgi apparatus
A1CNK1	82076.1	ATP-dependent RNA helicase rok1 OS=Aspergillus clavatus (strain ATCC 1007 / CBS 513.65 / DSM 816 / NCTC 3887 / NRRL 1) OX=344612 GN=rok1 PE=3 SV=1			2.78242		Nucleus
Q5AU92	82315.9	Alpha-galactosidase C OS=Emericella nidulans (strain FGSC A4 / ATCC 38163 / CBS 112.46 / NRRL 194 / M139) OX=227321 GN=aglC PE=1 SV=1			7.57708		Extracellular Region
A1D1E3	82343.3	ATP-dependent RNA helicase rok1 OS=Neosartorya fischeri (strain ATCC 1020 / DSM 3700 / CBS 544.65 / FGSC A1164 / JCM 1740 / NRRL 181 / WB 181) OX=331117 GN=rok1 PE=3 SV=1	1.50156				Nucleus
Q2UL89	82490.7	tRNA-dihydrouridine(47) synthase [NAD(P)(+)] OS=Aspergillus oryzae (strain ATCC 42149 / RIB 40) OX=510516 GN=dus3 PE=3 SV=1	3.06984				Cytoplasm
Q7Z8U2	82494.2	Palmitoyltransferase akr1 OS=Aspergillus oryzae (strain ATCC 42149 / RIB 40) OX=510516 GN=akr1 PE=3 SV=2		1.62077			Golgi apparatus
A1D3E2	82540.5	U3 small nucleolar RNA-associated protein 25 OS=Neosartorya fischeri (strain ATCC 1020 / DSM 3700 / CBS 544.65 / FGSC A1164 / JCM 1740 / NRRL 181 / WB 181) OX=331117 GN=utp25 PE=3 SV=1			4.99408		Nucleus
Q0CVH2	82686.7	Probable alpha-galactosidase C OS=Aspergillus terreus (strain NIH 2624 / FGSC A1156) OX=341663 GN=aglC PE=3 SV=1			7.73911		Extracellular Region
Q2TW34	82742.3	Catalase-peroxidase OS=Aspergillus oryzae (strain ATCC 42149 / RIB 40) OX=510516 GN=katG PE=3 SV=1	1.67122				Cytoplasm
Q5ATH9	82770.4	Exo-1_4-beta-xylosidase bxlB OS=Emericella nidulans (strain FGSC A4 / ATCC 38163 / CBS 112.46 / NRRL 194 / M139) OX=227321 GN=bxlB PE=1 SV=1			8.85663		Extracellular Region
A1CJ34	82787.3	ATP-dependent DNA helicase chl1 OS=Aspergillus clavatus (strain ATCC 1007 / CBS 513.65 / DSM 816 / NCTC 3887 / NRRL 1) OX=344612 GN=chl1 PE=3 SV=1	1.72437				Nucleus
B8NWY6;Q2TW69	83008	Probable alpha-galactosidase C OS=Aspergillus flavus (strain ATCC 200026 / FGSC A1120 / NRRL 3357 / JCM 12722 / SRRC 167) OX=332952 GN=aglC PE=3 SV=2			2.78555		Extracellular Region
P05328	83423.2	Multifunctional tryptophan biosynthesis protein OS=Aspergillus niger OX=5061 GN=trpC PE=3 SV=1			2.32552		Cytosol
Q2UL45	83657.5	Probable kinetochore protein ndc80 OS=Aspergillus oryzae (strain ATCC 42149 / RIB 40) OX=510516 GN=ndc80 PE=3 SV=1			2.15715		Nucleus
Q4WLS7	83665.9	Conserved oligomeric Golgi complex subunit 6 OS=Neosartorya fumigata (strain ATCC MYA-4609 / Af293 / CBS 101355 / FGSC A1100) OX=330879 GN=cog6 PE=3 SV=1	1.69461				Golgi apparatus
Q58FL6	83762	Homoaconitase_ mitochondrial OS=Aspergillus niger (strain CBS 513.88 / FGSC A1513) OX=425011 GN=lysA PE=3 SV=1	2.3019				Mitochondrion
A1CCL9	83810.9	Probable exo-1_4-beta-xylosidase bxlB OS=Aspergillus clavatus (strain ATCC 1007 / CBS 513.65 / DSM 816 / NCTC 3887 / NRRL 1) OX=344612 GN=bxlB PE=3 SV=2			4.88528		Extracellular Region
Q5AWD4	83868.3	Probable beta-glucosidase M OS=Emericella nidulans (strain FGSC A4 / ATCC 38163 / CBS 112.46 / NRRL 194 / M139) OX=227321 GN=bglM PE=3 SV=1			50.7917		Extracellular Region
B0YAK0;Q7Z7W6	83876.1	Catalase-peroxidase OS=Neosartorya fumigata (strain CEA10 / CBS 144.89 / FGSC A1163) OX=451804 GN=katG PE=3 SV=1	1.8899				Cytoplasm
A1CU89	83905.2	Conserved oligomeric Golgi complex subunit 6 OS=Aspergillus clavatus (strain ATCC 1007 / CBS 513.65 / DSM 816 / NCTC 3887 / NRRL 1) OX=344612 GN=cog6 PE=3 SV=1		1.88723			Golgi apparatus
A1C8R3	83956.9	Catalase-peroxidase OS=Aspergillus clavatus (strain ATCC 1007 / CBS 513.65 / DSM 816 / NCTC 3887 / NRRL 1) OX=344612 GN=katG PE=3 SV=1	1.92525				cytoplasm
B0YBJ3;Q4WA69;Q5BA18	84041.4	Probable beta-glucosidase K OS=Neosartorya fumigata (strain CEA10 / CBS 144.89 / FGSC A1163) OX=451804 GN=bglK PE=3 SV=1			5.48077		Extracellular Region
B0Y5B4;Q4WR16	84060.4	Protostadienol synthase A OS=Neosartorya fumigata (strain CEA10 / CBS 144.89 / FGSC A1163) OX=451804 GN=pdsA PE=3 SV=1	12.5008				Cytosol
A1DJS5	84120.7	Probable exo-1_4-beta-xylosidase xlnD OS=Neosartorya fischeri (strain ATCC 1020 / DSM 3700 / CBS 544.65 / FGSC A1164 / JCM 1740 / NRRL 181 / WB 181) OX=331117 GN=xlnD PE=3 SV=1		2.40208			Extracellular Region
A2QAU6	84287.6	tRNA-dihydrouridine(47) synthase [NAD(P)(+)] OS=Aspergillus niger (strain CBS 513.88 / FGSC A1513) OX=425011 GN=dus3 PE=3 SV=1	2.17437		1.80241		Nucleus
Q0C7L4	84555.4	Probable beta-glucosidase M OS=Aspergillus terreus (strain NIH 2624 / FGSC A1156) OX=341663 GN=bglM PE=3 SV=1	2.17614				Extracellular Region
Q4WAR8	84615.5	Transcriptional activator somA OS=Neosartorya fumigata (strain ATCC MYA-4609 / Af293 / CBS 101355 / FGSC A1100) OX=330879 GN=somA PE=1 SV=1			1.94798		Nucleus
Q2UE66	84982.2	ATP-dependent RNA helicase dbp7 OS=Aspergillus oryzae (strain ATCC 42149 / RIB 40) OX=510516 GN=dbp7 PE=3 SV=1	5.22818			4.1623	Nucleus
A2Q9N1	85472	Probable ubiquitin carboxyl-terminal hydrolase creB OS=Aspergillus niger (strain CBS 513.88 / FGSC A1513) OX=425011 GN=creB PE=3 SV=2				38.8992	Mitochondrion
C8VG90	85481.9	Aconitate hydratase_ mitochondrial OS=Emericella nidulans (strain FGSC A4 / ATCC 38163 / CBS 112.46 / NRRL 194 / M139) OX=227321 GN=acoA PE=2 SV=1			3.95956		Mitochondrion
Q4WPP6	85511	ABC multidrug transporter mdr2 OS=Neosartorya fumigata (strain ATCC MYA-4609 / Af293 / CBS 101355 / FGSC A1100) OX=330879 GN=mdr2 PE=2 SV=1			3.35328		Plasma membrane
Q5BGX6	85556.1	ATP-dependent RNA helicase dbp7 OS=Emericella nidulans (strain FGSC A4 / ATCC 38163 / CBS 112.46 / NRRL 194 / M139) OX=227321 GN=dbp7 PE=3 SV=1	1.70673				Nucleus
Q0C9R2	85571.6	Structure-specific endonuclease subunit slx4 OS=Aspergillus terreus (strain NIH 2624 / FGSC A1156) OX=341663 GN=slx4 PE=3 SV=2	2.34559				Nucleus
B8NSV5;Q2UUG8	85634.7	Probable ubiquitin carboxyl-terminal hydrolase creB OS=Aspergillus flavus (strain ATCC 200026 / FGSC A1120 / NRRL 3357 / JCM 12722 / SRRC 167) OX=332952 GN=creB PE=3 SV=1	1.63915				Nucleus
Q4WR75	85659.5	Ferric/cupric reductase transmembrane component B OS=Neosartorya fumigata (strain ATCC MYA-4609 / Af293 / CBS 101355 / FGSC A1100) OX=330879 GN=freB PE=2 SV=2	13.7562				Plasma membrane
Q5BGC2	85764.6	Patatin-like phospholipase domain-containing protein AN0408 OS=Emericella nidulans (strain FGSC A4 / ATCC 38163 / CBS 112.46 / NRRL 194 / M139) OX=227321 GN=AN0408 PE=3 SV=1				4.72377	Plasma membrane
Q4WJ90	85785.8	Putative aconitate hydratase_ mitochondrial OS=Neosartorya fumigata (strain ATCC MYA-4609 / Af293 / CBS 101355 / FGSC A1100) OX=330879 GN=acoB PE=2 SV=1			4.30854	4.71576	Mitochondrion
A2RA55	85859.4	ATP-dependent RNA helicase dbp7 OS=Aspergillus niger (strain CBS 513.88 / FGSC A1513) OX=425011 GN=dbp7 PE=3 SV=1			2.13239		Cytoplasm
Q2U9B0	85872.5	E3 ubiquitin-protein ligase bre1 OS=Aspergillus oryzae (strain ATCC 42149 / RIB 40) OX=510516 GN=bre1 PE=3 SV=1			6.74127		Nucleus
Q0CI35	85972.3	ATP-dependent RNA helicase mak5 OS=Aspergillus terreus (strain NIH 2624 / FGSC A1156) OX=341663 GN=mak5 PE=3 SV=2				4.51912	Nucleus
Q4WLN1	86042.5	Aconitate hydratase_ mitochondrial OS=Neosartorya fumigata (strain ATCC MYA-4609 / Af293 / CBS 101355 / FGSC A1100) OX=330879 GN=acoA PE=1 SV=1		2.2368			Mitochondrion
P28739	86142.9	Kinesin-like protein klpA OS=Emericella nidulans (strain FGSC A4 / ATCC 38163 / CBS 112.46 / NRRL 194 / M139) OX=227321 GN=klpA PE=2 SV=3		6.46462			Cytoskeleton
Q4WED9	86380.4	Isocyanide synthase xanB OS=Neosartorya fumigata (strain ATCC MYA-4609 / Af293 / CBS 101355 / FGSC A1100) OX=330879 GN=xanB PE=2 SV=2			3.00572		Cytoskeleton
A1CW53	86410	Probable ubiquitin carboxyl-terminal hydrolase creB OS=Neosartorya fischeri (strain ATCC 1020 / DSM 3700 / CBS 544.65 / FGSC A1164 / JCM 1740 / NRRL 181 / WB 181) OX=331117 GN=creB PE=3 SV=2				22.1622	Nucleus
Q5BGR9	86443.4	Protein transport protein sec23 OS=Emericella nidulans (strain FGSC A4 / ATCC 38163 / CBS 112.46 / NRRL 194 / M139) OX=227321 GN=sec23 PE=3 SV=1			2.21852		Mitochondrion
A1CHP1	86567.3	Probable dipeptidyl peptidase 4 OS=Aspergillus clavatus (strain ATCC 1007 / CBS 513.65 / DSM 816 / NCTC 3887 / NRRL 1) OX=344612 GN=dpp4 PE=3 SV=1			5.11088		Extracellular Region
P78985	86672.4	ATP-dependent 6-phosphofructokinase OS=Aspergillus niger OX=5061 GN=pfkA PE=3 SV=1	1.7747			4.25442	cytoplasm
B8MYV0;Q2UR38	86833.6	Probable exo-1_4-beta-xylosidase xlnD OS=Aspergillus flavus (strain ATCC 200026 / FGSC A1120 / NRRL 3357 / JCM 12722 / SRRC 167) OX=332952 GN=xlnD PE=3 SV=1	5.87439			3.95222	Extracellular Region
Q5AZ42	86854.8	Probable dipeptidyl peptidase 4 OS=Emericella nidulans (strain FGSC A4 / ATCC 38163 / CBS 112.46 / NRRL 194 / M139) OX=227321 GN=dpp4 PE=3 SV=1			4.06926		Extracellular Region
A1CND4;Q0CMH8	86976.7	Probable exo-1_4-beta-xylosidase xlnD OS=Aspergillus clavatus (strain ATCC 1007 / CBS 513.65 / DSM 816 / NCTC 3887 / NRRL 1) OX=344612 GN=xlnD PE=3 SV=2			9.40528		Extracellular Region
A2R797	87135.3	Probable alpha-fucosidase A OS=Aspergillus niger (strain CBS 513.88 / FGSC A1513) OX=425011 GN=afcA PE=3 SV=1			6.00594		Extracellular Region
Q5BCU6	87193.7	Pre-mRNA-splicing ATP-dependent RNA helicase prp28 OS=Emericella nidulans (strain FGSC A4 / ATCC 38163 / CBS 112.46 / NRRL 194 / M139) OX=227321 GN=prp28 PE=3 SV=2		1.51621	2.52125		Nucleus
B0Y4P5;Q4WQI1	87389	Probable ubiquitin carboxyl-terminal hydrolase creB OS=Neosartorya fumigata (strain CEA10 / CBS 144.89 / FGSC A1163) OX=451804 GN=creB PE=3 SV=1			4.78126		Nucleus
C8V8H5	87869.6	Ino eighty subunit 1 OS=Emericella nidulans (strain FGSC A4 / ATCC 38163 / CBS 112.46 / NRRL 194 / M139) OX=227321 GN=AN10560 PE=3 SV=1			2.14154	3.10888	Nucleus
Q2UPK0;A1D3F5	87993.4	Ribosome biogenesis protein erb1 OS=Aspergillus oryzae (strain ATCC 42149 / RIB 40) OX=510516 GN=erb1 PE=3 SV=1	2.06143		5.63484		Nucleus
B8NMR5;Q2U325	88100	Probable beta-glucosidase G OS=Aspergillus flavus (strain ATCC 200026 / FGSC A1120 / NRRL 3357 / JCM 12722 / SRRC 167) OX=332952 GN=bglG PE=3 SV=1		1.58761			Extracellular Region
A2QPZ4	88269.8	Ribosome biogenesis protein erb1 OS=Aspergillus niger (strain CBS 513.88 / FGSC A1513) OX=425011 GN=erb1 PE=3 SV=1				3.48489	Nucleus
C0STD9	88410.9	Conidiophore development regulator abaA OS=Aspergillus oryzae (strain ATCC 42149 / RIB 40) OX=510516 GN=abaA PE=2 SV=1			2.78347		Nucleus
B0YA45;Q4WCJ7;A1DB29	88442.2	Protein sip5 OS=Neosartorya fumigata (strain CEA10 / CBS 144.89 / FGSC A1163) OX=451804 GN=sip5 PE=3 SV=1			1.70081	10.3499	Cytoplasm
Q4WPE9;A1CX72	88565.3	Pre-mRNA-splicing ATP-dependent RNA helicase prp28 OS=Neosartorya fumigata (strain ATCC MYA-4609 / Af293 / CBS 101355 / FGSC A1100) OX=330879 GN=prp28 PE=3 SV=1	2.53248				Cytoplasm
Q4WWE9	88796.1	ATP-dependent DNA helicase chl1 OS=Neosartorya fumigata (strain ATCC MYA-4609 / Af293 / CBS 101355 / FGSC A1100) OX=330879 GN=chl1 PE=3 SV=1	2.90927				Nucleus
Q9VRA2	89301.2	Molybdenum cofactor sulfurase OS=Drosophila melanogaster OX=7227 GN=mal PE=1 SV=1				4.52789	Cytoplasm
A1D8J1	89376.4	C6 finger domain transcription factor nscR OS=Neosartorya fischeri (strain ATCC 1020 / DSM 3700 / CBS 544.65 / FGSC A1164 / JCM 1740 / NRRL 181 / WB 181) OX=331117 GN=nscR PE=3 SV=1			4.02028		Nucleus
B8N9M2;Q2UGQ2	89521.9	Elongation factor G_ mitochondrial OS=Aspergillus flavus (strain ATCC 200026 / FGSC A1120 / NRRL 3357 / JCM 12722 / SRRC 167) OX=332952 GN=mef1 PE=3 SV=1	2.4808			5.8108	Mitochondrion
Q9Z1J2	89735.9	Serine/threonine-protein kinase Nek4 OS=Mus musculus OX=10090 GN=Nek4 PE=1 SV=1	2.85268				Cytoplasm
Q0CKU1	89830.6	Polynucleotide 5'-hydroxyl-kinase grc3 OS=Aspergillus terreus (strain NIH 2624 / FGSC A1156) OX=341663 GN=grc3 PE=3 SV=1				5.19645	Nucleus
Q5B6J8	89833	Elongation factor G_ mitochondrial OS=Emericella nidulans (strain FGSC A4 / ATCC 38163 / CBS 112.46 / NRRL 194 / M139) OX=227321 GN=mef1 PE=3 SV=1	1.77031				Mitochondrion
Q0CQ46	89870.8	Nitrogen permease regulator 3 OS=Aspergillus terreus (strain NIH 2624 / FGSC A1156) OX=341663 GN=npr3 PE=3 SV=1	3.06195				Nucleus
A1DMR2	90344.7	Mitochondrial intermediate peptidase OS=Neosartorya fischeri (strain ATCC 1020 / DSM 3700 / CBS 544.65 / FGSC A1164 / JCM 1740 / NRRL 181 / WB 181) OX=331117 GN=oct1 PE=3 SV=1	3.36513				Mitochondrion
Q2UUV3	90451.7	Conserved oligomeric Golgi complex subunit 6 OS=Aspergillus oryzae (strain ATCC 42149 / RIB 40) OX=510516 GN=cog6 PE=3 SV=1			1.5161		Golgi apparatus
P17885	90456.4	Protein bimA OS=Emericella nidulans (strain FGSC A4 / ATCC 38163 / CBS 112.46 / NRRL 194 / M139) OX=227321 GN=bimA PE=2 SV=1	3.31404				Nucleus
Q4WVH3	90514.8	AdoMet-dependent rRNA methyltransferase spb1 OS=Neosartorya fumigata (strain ATCC MYA-4609 / Af293 / CBS 101355 / FGSC A1100) OX=330879 GN=spb1 PE=3 SV=1	3.61648			30.0391	Nucleus
A1D1R8	90532.1	ATP-dependent RNA helicase drs1 OS=Neosartorya fischeri (strain ATCC 1020 / DSM 3700 / CBS 544.65 / FGSC A1164 / JCM 1740 / NRRL 181 / WB 181) OX=331117 GN=drs1 PE=3 SV=1	1.65411				Nucleus
A2R989	90564.4	Probable beta-glucosidase I OS=Aspergillus niger (strain CBS 513.88 / FGSC A1513) OX=425011 GN=bglI PE=3 SV=1			2.83996	8.31171	Extracellular Region
C8VSE7	90740.8	Nitrogen permease regulator 3 OS=Emericella nidulans (strain FGSC A4 / ATCC 38163 / CBS 112.46 / NRRL 194 / M139) OX=227321 GN=npr3 PE=3 SV=1	2.11042				Nucleus
Q2UPC0	90762.3	ABC transporter aclQ OS=Aspergillus oryzae (strain ATCC 42149 / RIB 40) OX=510516 GN=aclQ PE=3 SV=1			1.71008		Plasma membrane
A2QS00	90774.9	ATP-dependent RNA helicase dbp4 OS=Aspergillus niger (strain CBS 513.88 / FGSC A1513) OX=425011 GN=dbp4 PE=3 SV=1			1.82394		Nucleus
A1CFL9	90776.1	Patulin cluster transcription factor patL OS=Aspergillus clavatus (strain ATCC 1007 / CBS 513.65 / DSM 816 / NCTC 3887 / NRRL 1) OX=344612 GN=patL PE=1 SV=1				2.60028	Nucleus
A2QNQ8	90779.9	Polynucleotide 5'-hydroxyl-kinase grc3 OS=Aspergillus niger (strain CBS 513.88 / FGSC A1513) OX=425011 GN=grc3 PE=3 SV=2				13.2626	Nucleus
A5AAW6	90800.7	Structure-specific endonuclease subunit slx4 OS=Aspergillus niger (strain CBS 513.88 / FGSC A1513) OX=425011 GN=slx4 PE=3 SV=2			4.22227		Nucleus
Q5AWS6	90825.8	Cell division control protein 48 OS=Emericella nidulans (strain FGSC A4 / ATCC 38163 / CBS 112.46 / NRRL 194 / M139) OX=227321 GN=cdc48 PE=1 SV=2	4.68916		3.23308		cytosol
Q0CZN5	90893.1	ATP-dependent RNA helicase drs1 OS=Aspergillus terreus (strain NIH 2624 / FGSC A1156) OX=341663 GN=drs1 PE=3 SV=1				2.57062	Nucleus
P10563	91196.3	Quinic acid utilization activator OS=Emericella nidulans (strain FGSC A4 / ATCC 38163 / CBS 112.46 / NRRL 194 / M139) OX=227321 GN=qutA PE=4 SV=2	2.42606				Nucleus
A1CUR8	91230.6	Probable beta-glucosidase H OS=Aspergillus clavatus (strain ATCC 1007 / CBS 513.65 / DSM 816 / NCTC 3887 / NRRL 1) OX=344612 GN=bglH PE=3 SV=1			2.40656		Extracellular Region
Q0CMM5	91248.7	ATP-dependent RNA helicase dbp4 OS=Aspergillus terreus (strain NIH 2624 / FGSC A1156) OX=341663 GN=dbp4 PE=3 SV=2	1.72887				Nucleus
A1DPG0	91331.9	Probable beta-glucosidase H OS=Neosartorya fischeri (strain ATCC 1020 / DSM 3700 / CBS 544.65 / FGSC A1164 / JCM 1740 / NRRL 181 / WB 181) OX=331117 GN=bglH PE=3 SV=1				47.1841	Extracellular Region
Q5BGA9	91399.8	Multiple RNA-binding domain-containing protein 1 OS=Emericella nidulans (strain FGSC A4 / ATCC 38163 / CBS 112.46 / NRRL 194 / M139) OX=227321 GN=mrd1 PE=3 SV=1				1.71084	Nucleus
Q5BH88	91825.8	AdoMet-dependent rRNA methyltransferase spb1 OS=Emericella nidulans (strain FGSC A4 / ATCC 38163 / CBS 112.46 / NRRL 194 / M139) OX=227321 GN=spb1 PE=3 SV=1		3.87956			Nucleus
A1CYR9	92132.6	Polynucleotide 5'-hydroxyl-kinase grc3 OS=Neosartorya fischeri (strain ATCC 1020 / DSM 3700 / CBS 544.65 / FGSC A1164 / JCM 1740 / NRRL 181 / WB 181) OX=331117 GN=grc3 PE=3 SV=1				2.50772	Nucleus
Q5BFG8	92188.8	Beta-glucosidase B OS=Emericella nidulans (strain FGSC A4 / ATCC 38163 / CBS 112.46 / NRRL 194 / M139) OX=227321 GN=bglB PE=1 SV=1			2.91301		cytoplasm
Q0CAF5	92202.6	Probable beta-glucosidase I OS=Aspergillus terreus (strain NIH 2624 / FGSC A1156) OX=341663 GN=bglI PE=3 SV=1	2.12664				Extracellular Region
A1CFB5	92312.8	Polynucleotide 5'-hydroxyl-kinase grc3 OS=Aspergillus clavatus (strain ATCC 1007 / CBS 513.65 / DSM 816 / NCTC 3887 / NRRL 1) OX=344612 GN=grc3 PE=3 SV=1			2.58462		Nucleus
A1CQG2	92416.6	Probable E3 ubiquitin-protein ligase hulA OS=Aspergillus clavatus (strain ATCC 1007 / CBS 513.65 / DSM 816 / NCTC 3887 / NRRL 1) OX=344612 GN=hulA PE=3 SV=2				295.15	Cytoplasm
A1CA51	92699.8	Probable beta-glucosidase I OS=Aspergillus clavatus (strain ATCC 1007 / CBS 513.65 / DSM 816 / NCTC 3887 / NRRL 1) OX=344612 GN=bglI PE=3 SV=1	3.3415	1.90659			Extracellular Region
Q4WID9	93087.7	Polynucleotide 5'-hydroxyl-kinase grc3 OS=Neosartorya fumigata (strain ATCC MYA-4609 / Af293 / CBS 101355 / FGSC A1100) OX=330879 GN=grc3 PE=3 SV=2		1.66174			Nucleus
A2QJX5	93087.9	Arabinanolytic transcriptional activator araR OS=Aspergillus niger (strain CBS 513.88 / FGSC A1513) OX=425011 GN=araR PE=3 SV=1	6.55395				Nucleus
O13415	93110.3	Nitrogen regulatory protein areA OS=Aspergillus oryzae (strain ATCC 42149 / RIB 40) OX=510516 GN=areA PE=4 SV=1			2.88374		Nucleus
A1CTZ2	93193.4	ATP-dependent RNA helicase dbp4 OS=Aspergillus clavatus (strain ATCC 1007 / CBS 513.65 / DSM 816 / NCTC 3887 / NRRL 1) OX=344612 GN=dbp4 PE=3 SV=1	2.58878				Nucleus
Q9R1S8	93362.8	Calpain-7 OS=Mus musculus OX=10090 GN=Capn7 PE=2 SV=1	12.0981				Nucleus
B0Y7Q8;Q4WMU3	93459.5	Probable beta-glucosidase F OS=Neosartorya fumigata (strain CEA10 / CBS 144.89 / FGSC A1163) OX=451804 GN=bglF PE=3 SV=2			4.10928		Extracellular Region
Q9UV64	93553.2	Molybdenum cofactor sulfurase OS=Emericella nidulans (strain FGSC A4 / ATCC 38163 / CBS 112.46 / NRRL 194 / M139) OX=227321 GN=hxB PE=2 SV=2			5.51091		Cytoplasm
Q5B5S8	93641.4	Probable beta-glucosidase A OS=Emericella nidulans (strain FGSC A4 / ATCC 38163 / CBS 112.46 / NRRL 194 / M139) OX=227321 GN=bglA PE=3 SV=2	10.1764				Extracellular Region
Q5BBL3	93705.9	Serine/threonine-protein kinase ste20 OS=Emericella nidulans (strain FGSC A4 / ATCC 38163 / CBS 112.46 / NRRL 194 / M139) OX=227321 GN=ste20 PE=3 SV=1			3.3288		Nucleus
Q5KU05	93789.7	pH-response regulator protein palA/RIM20 OS=Aspergillus oryzae (strain ATCC 42149 / RIB 40) OX=510516 GN=palA PE=3 SV=2	2.23041				Nucleus
B8NRX2;Q2UUD6	93814.2	Probable beta-glucosidase A OS=Aspergillus flavus (strain ATCC 200026 / FGSC A1120 / NRRL 3357 / JCM 12722 / SRRC 167) OX=332952 GN=bglA PE=3 SV=1		2.90335	1.66627	9.15929	Extracellular Region
Q2U9L6	93917.6	Conidiophore development regulator abaB OS=Aspergillus oryzae (strain ATCC 42149 / RIB 40) OX=510516 GN=abaB PE=3 SV=1		4.60715			Nucleus
B8NJG9	94055.8	Transcription factor lepE OS=Aspergillus flavus (strain ATCC 200026 / FGSC A1120 / NRRL 3357 / JCM 12722 / SRRC 167) OX=332952 GN=lepB PE=3 SV=1			4.00256		Nucleus
A2R994	94114.2	Ribosome-releasing factor 2_ mitochondrial OS=Aspergillus niger (strain CBS 513.88 / FGSC A1513) OX=425011 GN=mef2 PE=3 SV=1	2.51061				Mitochondrion
O42814	94246.6	Alpha-glucuronidase A OS=Aspergillus tubingensis OX=5068 GN=aguA PE=1 SV=1			4.49604		Extracellular Region
A1CR85	94451.9	Probable beta-glucosidase A OS=Aspergillus clavatus (strain ATCC 1007 / CBS 513.65 / DSM 816 / NCTC 3887 / NRRL 1) OX=344612 GN=bglA PE=3 SV=1	2.17171				Extracellular Region
P17429	94481.1	Nitrogen regulatory protein areA OS=Emericella nidulans (strain FGSC A4 / ATCC 38163 / CBS 112.46 / NRRL 194 / M139) OX=227321 GN=areA PE=1 SV=2		2.16896			Nucleus
A2QPL8	94595.3	Mitochondrial escape protein 2 OS=Aspergillus niger (strain CBS 513.88 / FGSC A1513) OX=425011 GN=yme2 PE=3 SV=1		2.53108	1.9438	4.11509	Mitochondrion
A1CTI3	94720.3	Probable glucan 1_3-beta-glucosidase D OS=Aspergillus clavatus (strain ATCC 1007 / CBS 513.65 / DSM 816 / NCTC 3887 / NRRL 1) OX=344612 GN=exgD PE=3 SV=1				9.22353	Plasma membrane
P48479	94803.7	G2-specific protein kinase nim-1 OS=Neurospora crassa (strain ATCC 24698 / 74-OR23-1A / CBS 708.71 / DSM 1257 / FGSC 987) OX=367110 GN=nim-1 PE=2 SV=2			2.69546		Nucleus
Q2U9J2	95067.7	GPI ethanolamine phosphate transferase 2 OS=Aspergillus oryzae (strain ATCC 42149 / RIB 40) OX=510516 GN=las21 PE=3 SV=2			3.91652		endosplamic reticulam
B0XPE1;Q4WJJ3	95153	Probable beta-glucosidase A OS=Neosartorya fumigata (strain CEA10 / CBS 144.89 / FGSC A1163) OX=451804 GN=bglA PE=3 SV=1	6.67697				Extracellular Region
P79020	95224.9	pH-response regulator protein palA/RIM20 OS=Emericella nidulans (strain FGSC A4 / ATCC 38163 / CBS 112.46 / NRRL 194 / M139) OX=227321 GN=palA PE=1 SV=3			1.70424		Endosomes
B0Y7W2;Q4WMP0	95230.8	Probable glucan 1_3-beta-glucosidase D OS=Neosartorya fumigata (strain CEA10 / CBS 144.89 / FGSC A1163) OX=451804 GN=exgD PE=3 SV=1			1.88357		Plasma membrane
K0E2G4	96097.2	Aconitase htyD OS=Aspergillus rugulosus OX=41736 GN=htyD PE=1 SV=1	2.15602	1.68951			Cytoskeleton
A1CQD6	96198.3	Nitrogen permease regulator 3 OS=Aspergillus clavatus (strain ATCC 1007 / CBS 513.65 / DSM 816 / NCTC 3887 / NRRL 1) OX=344612 GN=npr3 PE=3 SV=1	1.76267				Mitochondrion
A2QR20	96493.7	Protein sey1 OS=Aspergillus niger (strain CBS 513.88 / FGSC A1513) OX=425011 GN=sey1 PE=3 SV=1				2.47829	Endoplasmic reticulum
Q5B7W2	96823.2	Beta-mannosidase B OS=Emericella nidulans (strain FGSC A4 / ATCC 38163 / CBS 112.46 / NRRL 194 / M139) OX=227321 GN=mndB PE=1 SV=2			2.09464	50.2131	Cytoplasm
P38094	96904.6	Protein fluG OS=Emericella nidulans (strain FGSC A4 / ATCC 38163 / CBS 112.46 / NRRL 194 / M139) OX=227321 GN=fluG PE=1 SV=1	3.18715				Cytoplasm
Q5B4M1	97350.3	Structure-specific endonuclease subunit slx4 OS=Emericella nidulans (strain FGSC A4 / ATCC 38163 / CBS 112.46 / NRRL 194 / M139) OX=227321 GN=slx4 PE=3 SV=1		2.11495			Nucleus
Q4WVF4	97472.7	Pre-mRNA-splicing factor syf1 OS=Neosartorya fumigata (strain ATCC MYA-4609 / Af293 / CBS 101355 / FGSC A1100) OX=330879 GN=syf1 PE=3 SV=1			1.82265		Nucleus
A2QYN2	97801.2	Beta-mannosidase B OS=Aspergillus niger (strain CBS 513.88 / FGSC A1513) OX=425011 GN=mndB PE=3 SV=1			16.3071		Cytoplasm
P36858	97816.4	Nitrate reductase [NADPH] OS=Aspergillus niger OX=5061 GN=niaD PE=3 SV=1	2.28665		27.7715		Cytoplasm
Q0CS62	98192.2	Trimodular acetylaranotin synthesis protein ataIMG OS=Aspergillus terreus (strain NIH 2624 / FGSC A1156) OX=341663 GN=ataIMG PE=3 SV=1				2.30189	Mitochondrion
Q5BEP0	98198.4	Endoribonuclease ysh1 OS=Emericella nidulans (strain FGSC A4 / ATCC 38163 / CBS 112.46 / NRRL 194 / M139) OX=227321 GN=ysh1 PE=3 SV=1				3.05509	Nucleus
Q5BH69	98901.5	Pre-mRNA-splicing factor syf1 OS=Emericella nidulans (strain FGSC A4 / ATCC 38163 / CBS 112.46 / NRRL 194 / M139) OX=227321 GN=syf1 PE=3 SV=1			2.1904		Nucleus
Q5AVS0	99239.3	Xylanolytic transcriptional activator xlnR OS=Emericella nidulans (strain FGSC A4 / ATCC 38163 / CBS 112.46 / NRRL 194 / M139) OX=227321 GN=xlnR PE=2 SV=2				4.75415	Nucleus
Q5BGP1	99625.2	Pre-mRNA-splicing factor cwc22 OS=Emericella nidulans (strain FGSC A4 / ATCC 38163 / CBS 112.46 / NRRL 194 / M139) OX=227321 GN=cwc22 PE=3 SV=2	3.12391				Cytoplasm
A1CNK4	100303	Probable alpha/beta-glucosidase agdC OS=Aspergillus clavatus (strain ATCC 1007 / CBS 513.65 / DSM 816 / NCTC 3887 / NRRL 1) OX=344612 GN=agdC PE=3 SV=1	3.83154		2.2774	3.0585	Extracellular Region
Q2ULI0	100343	Protein transport protein sec24 OS=Aspergillus oryzae (strain ATCC 42149 / RIB 40) OX=510516 GN=sec24 PE=3 SV=1			3.0048		Golgi apparatus
P28348	100475	Nitrogen assimilation transcription factor nirA OS=Emericella nidulans (strain FGSC A4 / ATCC 38163 / CBS 112.46 / NRRL 194 / M139) OX=227321 GN=nirA PE=4 SV=1			2.63557		Nucleus
Q4WKB9	101356	Pre-mRNA-splicing factor cwc22 OS=Neosartorya fumigata (strain ATCC MYA-4609 / Af293 / CBS 101355 / FGSC A1100) OX=330879 GN=cwc22 PE=3 SV=1			3.18755		Nucleus
Q4WAZ0	101546	Dual-functional monooxygenase/methyltransferase psoF OS=Neosartorya fumigata (strain ATCC MYA-4609 / Af293 / CBS 101355 / FGSC A1100) OX=330879 GN=psoF PE=1 SV=1	2.77473		2.29621		cytoplasm
Q92197	101782	Chitin synthase C OS=Neosartorya fumigata (strain ATCC MYA-4609 / Af293 / CBS 101355 / FGSC A1100) OX=330879 GN=chsC PE=3 SV=2				20.1751	Plasma membrane
Q5B934	102131	Probable dipeptidyl-aminopeptidase B OS=Emericella nidulans (strain FGSC A4 / ATCC 38163 / CBS 112.46 / NRRL 194 / M139) OX=227321 GN=dapB PE=3 SV=2	3.95903			3.54024	Vacuole
Q5BFU7	102507	ATP-dependent RNA helicase dbp10 OS=Emericella nidulans (strain FGSC A4 / ATCC 38163 / CBS 112.46 / NRRL 194 / M139) OX=227321 GN=dbp10 PE=3 SV=1			5.80105		Nucleus
A2RAF6	102623	Lon protease homolog 2_ peroxisomal OS=Aspergillus niger (strain CBS 513.88 / FGSC A1513) OX=425011 GN=An18g02980 PE=3 SV=1	2.8481				Peroxisomes
P0C1B1	102686	Serine/threonine-protein kinase cbk1 OS=Emericella nidulans (strain FGSC A4 / ATCC 38163 / CBS 112.46 / NRRL 194 / M139) OX=227321 GN=cbk1 PE=3 SV=2	5.28101		4.35534		Nucleus
Q4WVD9	102703	Lon protease homolog 2_ peroxisomal OS=Neosartorya fumigata (strain ATCC MYA-4609 / Af293 / CBS 101355 / FGSC A1100) OX=330879 GN=AFUA_5G11750 PE=3 SV=1			4.4794		Peroxisomes
Q4WHN5	102816	Autophagy-related protein 13 OS=Neosartorya fumigata (strain ATCC MYA-4609 / Af293 / CBS 101355 / FGSC A1100) OX=330879 GN=atg13 PE=3 SV=1	1.67198				Cytoplasm
Q0CXB1	102861	Probable dipeptidyl-aminopeptidase B OS=Aspergillus terreus (strain NIH 2624 / FGSC A1156) OX=341663 GN=dapB PE=3 SV=1			2.43755		Vacuole
Q96WP8	102992	Xylanolytic transcriptional activator xlnR OS=Aspergillus kawachii OX=40384 GN=xlnR PE=3 SV=2			2.66203		Nucleus
A1D7R6	103098	Probable dipeptidyl-aminopeptidase B OS=Neosartorya fischeri (strain ATCC 1020 / DSM 3700 / CBS 544.65 / FGSC A1164 / JCM 1740 / NRRL 181 / WB 181) OX=331117 GN=dapB PE=3 SV=1				4.83309	Vacuole
A1CTZ6	103122	ATP-dependent RNA helicase dbp10 OS=Aspergillus clavatus (strain ATCC 1007 / CBS 513.65 / DSM 816 / NCTC 3887 / NRRL 1) OX=344612 GN=dbp10 PE=3 SV=1	3.10977				Nucleus
B8N076;Q2UPW4	103344	Probable dipeptidyl-aminopeptidase B OS=Aspergillus flavus (strain ATCC 200026 / FGSC A1120 / NRRL 3357 / JCM 12722 / SRRC 167) OX=332952 GN=dapB PE=3 SV=1	1.71462		2.27282		Vacuole
Q5BE03	103462	Mediator of RNA polymerase II transcription subunit 16 OS=Emericella nidulans (strain FGSC A4 / ATCC 38163 / CBS 112.46 / NRRL 194 / M139) OX=227321 GN=sin4 PE=3 SV=2				3.69961	Nucleus
A2QWU9	104198	Beta-mannosidase A OS=Aspergillus niger (strain CBS 513.88 / FGSC A1513) OX=425011 GN=mndA PE=3 SV=1		3.76747		6.14219	Extracellular Region
Q0CV52	105107	Xylanolytic transcriptional activator xlnR OS=Aspergillus terreus (strain NIH 2624 / FGSC A1156) OX=341663 GN=xlnR PE=3 SV=2			2.38843		Nucleus
Q0CBN5	105342	Nonribosomal peptide synthetase pngA OS=Aspergillus terreus (strain NIH 2624 / FGSC A1156) OX=341663 GN=pngA PE=1 SV=1			2.28461		Extracellular Region
P30583	105686	Chitin synthase C OS=Emericella nidulans (strain FGSC A4 / ATCC 38163 / CBS 112.46 / NRRL 194 / M139) OX=227321 GN=chsC PE=3 SV=3			1.64407	2.57373	Plasma membrane
Q5BCI8	105993	Beta-mannosidase A OS=Emericella nidulans (strain FGSC A4 / ATCC 38163 / CBS 112.46 / NRRL 194 / M139) OX=227321 GN=mndA PE=3 SV=1			2.02645		Extracellular Region
B8N6M6;Q2UD93	106024	Xylanolytic transcriptional activator xlnR OS=Aspergillus flavus (strain ATCC 200026 / FGSC A1120 / NRRL 3357 / JCM 12722 / SRRC 167) OX=332952 GN=xlnR PE=3 SV=1	1.64362		4.92973	2.21707	Nucleus
C8V4D5	106694	Vacuolar membrane protease OS=Emericella nidulans (strain FGSC A4 / ATCC 38163 / CBS 112.46 / NRRL 194 / M139) OX=227321 GN=AN10522 PE=3 SV=1			7.13055		Vacuole
A1CU77	107111	Autophagy-related protein 9 OS=Aspergillus clavatus (strain ATCC 1007 / CBS 513.65 / DSM 816 / NCTC 3887 / NRRL 1) OX=344612 GN=atg9 PE=3 SV=1				3.23906	Endoplasmic reticulum
B0Y752;Q4WNE4	108263	Probable beta-galactosidase C OS=Neosartorya fumigata (strain CEA10 / CBS 144.89 / FGSC A1163) OX=451804 GN=lacC PE=3 SV=1			16.042		Extracellular Region
Q2UUT6	108511	Autophagy-related protein 9 OS=Aspergillus oryzae (strain ATCC 42149 / RIB 40) OX=510516 GN=atg9 PE=3 SV=1			2.26986		Golgi apparatus
A1CE56	108622	Probable beta-galactosidase C OS=Aspergillus clavatus (strain ATCC 1007 / CBS 513.65 / DSM 816 / NCTC 3887 / NRRL 1) OX=344612 GN=lacC PE=3 SV=1				2.30231	Extracellular Region
Q12558	109161	Alpha-glucosidase OS=Aspergillus oryzae (strain ATCC 42149 / RIB 40) OX=510516 GN=agdA PE=2 SV=1		2.68515			Extracellular Region
A2RAN5	109168	Vacuolar membrane protease OS=Aspergillus niger (strain CBS 513.88 / FGSC A1513) OX=425011 GN=An18g03780 PE=3 SV=1			11.7668	9.21762	Vacuole
O43283	109494	Mitogen-activated protein kinase kinase kinase 13 OS=Homo sapiens OX=9606 GN=MAP3K13 PE=1 SV=1	3.14493				Cytoplasm
Q5BBC6	109620	Phosphatidylethanolamine N-methyltransferase OS=Emericella nidulans (strain FGSC A4 / ATCC 38163 / CBS 112.46 / NRRL 194 / M139) OX=227321 GN=choA PE=3 SV=2			77.2804		Endoplasmic reticulum
Q0CT23	109658	Probable ubiquitination network signaling protein acrB OS=Aspergillus terreus (strain NIH 2624 / FGSC A1156) OX=341663 GN=acrB PE=3 SV=1			3.5774		Plasma membrane
P29853;A2QAN3;Q4ZHV7	109731	Beta-galactosidase OS=Aspergillus niger OX=5061 GN=lacA PE=1 SV=2	1.66203				Extracellular Region
Q2UUI0	109913	Probable ubiquitination network signaling protein acrB OS=Aspergillus oryzae (strain ATCC 42149 / RIB 40) OX=510516 GN=acrB PE=3 SV=2	2.43936		2.1386		Plasma membrane
B8N6H2;Q2UDE5	110142	Phosphatidylethanolamine N-methyltransferase OS=Aspergillus flavus (strain ATCC 200026 / FGSC A1120 / NRRL 3357 / JCM 12722 / SRRC 167) OX=332952 GN=cho2 PE=3 SV=1		1.85352			Endoplasmic reticulum
A1CIK0	110188	Probable ubiquitination network signaling protein acrB OS=Aspergillus clavatus (strain ATCC 1007 / CBS 513.65 / DSM 816 / NCTC 3887 / NRRL 1) OX=344612 GN=acrB PE=3 SV=1	2.30344	1.6217			Plasma membrane
Q2UTN6	110266	Histone-lysine N-methyltransferase_ H3 lysine-36 specific OS=Aspergillus oryzae (strain ATCC 42149 / RIB 40) OX=510516 GN=set2 PE=3 SV=1				3.44938	Nucleus
C8V212	110935	Vacuolar protein-sorting protein bro1 OS=Emericella nidulans (strain FGSC A4 / ATCC 38163 / CBS 112.46 / NRRL 194 / M139) OX=227321 GN=broA PE=3 SV=1	3.13794	11.4743	3.24593		Cytoplasm
Q5BFC4	111384	Probable beta-galactosidase A OS=Emericella nidulans (strain FGSC A4 / ATCC 38163 / CBS 112.46 / NRRL 194 / M139) OX=227321 GN=lacA PE=3 SV=2				3.80548	Extracellular Region
Q2UGU3	111400	Transcription elongation factor spt5 OS=Aspergillus oryzae (strain ATCC 42149 / RIB 40) OX=510516 GN=spt5 PE=3 SV=1		4.78544			Nucleus
Q0CMF3	111871	Probable beta-galactosidase B OS=Aspergillus terreus (strain NIH 2624 / FGSC A1156) OX=341663 GN=lacB PE=3 SV=2	2.18542		2.63446		Extracellular Region
B0XXE7;Q4WG05	111963	Probable beta-galactosidase E OS=Neosartorya fumigata (strain CEA10 / CBS 144.89 / FGSC A1163) OX=451804 GN=lacE PE=3 SV=1		1.73398			Extracellular Region
B0XNY2;Q4WRD3	111966	Probable beta-galactosidase B OS=Neosartorya fumigata (strain CEA10 / CBS 144.89 / FGSC A1163) OX=451804 GN=lacB PE=3 SV=1				8.42585	Extracellular Region
Q2UG94	112450	Mediator of RNA polymerase II transcription subunit 5 OS=Aspergillus oryzae (strain ATCC 42149 / RIB 40) OX=510516 GN=NUT1 PE=3 SV=2		2.54836			Nucleus
Q4WVG8	112563	DNA ligase 4 OS=Neosartorya fumigata (strain ATCC MYA-4609 / Af293 / CBS 101355 / FGSC A1100) OX=330879 GN=lig4 PE=3 SV=1	1.79789				Nucleus
Q5BEQ0	113304	Probable beta-galactosidase B OS=Emericella nidulans (strain FGSC A4 / ATCC 38163 / CBS 112.46 / NRRL 194 / M139) OX=227321 GN=lacB PE=3 SV=2			13.6206		Extracellular Region
Q4WTC4	113376	Protein hir1 OS=Neosartorya fumigata (strain ATCC MYA-4609 / Af293 / CBS 101355 / FGSC A1100) OX=330879 GN=hir1 PE=3 SV=1			1.50672		Nucleus
B0YD91;Q4WD56	113880	Probable beta-glucosidase E OS=Neosartorya fumigata (strain CEA10 / CBS 144.89 / FGSC A1163) OX=451804 GN=bglE PE=3 SV=1				11.7346	Plasma membrane
Q5BAH2	114032	Cullin-associated NEDD8-dissociated protein 1_ C-terminal part OS=Emericella nidulans (strain FGSC A4 / ATCC 38163 / CBS 112.46 / NRRL 194 / M139) OX=227321 GN=candA-C PE=1 SV=1			3.16017		Nucleus
Q4WP96	114286	Transcription elongation factor spt5 OS=Neosartorya fumigata (strain ATCC MYA-4609 / Af293 / CBS 101355 / FGSC A1100) OX=330879 GN=spt5 PE=3 SV=1			2.75271		Nucleus
Q4W9R7	114402	GPI ethanolamine phosphate transferase 1 OS=Neosartorya fumigata (strain ATCC MYA-4609 / Af293 / CBS 101355 / FGSC A1100) OX=330879 GN=mcd4 PE=2 SV=1			3.53109		Endoplasmic reticulum
Q2UGN1	114774	Mitochondrial presequence protease OS=Aspergillus oryzae (strain ATCC 42149 / RIB 40) OX=510516 GN=cym1 PE=3 SV=1				6.7691	Mitochondrion
Q2UTX5	114913	Probable beta-glucosidase E OS=Aspergillus oryzae (strain ATCC 42149 / RIB 40) OX=510516 GN=bglE PE=3 SV=2	2.70374				Plasma membrane
A1CAU2	115108	Exportin-T OS=Aspergillus clavatus (strain ATCC 1007 / CBS 513.65 / DSM 816 / NCTC 3887 / NRRL 1) OX=344612 GN=los1 PE=3 SV=1			3.37927		Cytoplasm
Q0CSC0	115111	Pro-apoptotic serine protease nma111 OS=Aspergillus terreus (strain NIH 2624 / FGSC A1156) OX=341663 GN=nma111 PE=3 SV=2	2.24054	1.83479	2.28604		Nucleus
A2QMS5	115236	Exportin-T OS=Aspergillus niger (strain CBS 513.88 / FGSC A1513) OX=425011 GN=los1 PE=3 SV=1	2.2924				Nucleus
A1DLJ5	115274	Probable beta-glucosidase E OS=Neosartorya fischeri (strain ATCC 1020 / DSM 3700 / CBS 544.65 / FGSC A1164 / JCM 1740 / NRRL 181 / WB 181) OX=331117 GN=bglE PE=3 SV=1			2.13715		Plasma membrane
Q4WJ02	115381	FACT complex subunit spt16 OS=Neosartorya fumigata (strain ATCC MYA-4609 / Af293 / CBS 101355 / FGSC A1100) OX=330879 GN=spt16 PE=3 SV=1		1.60055	3.09916		Nucleus
P78617	115396	Acid trehalase OS=Emericella nidulans (strain FGSC A4 / ATCC 38163 / CBS 112.46 / NRRL 194 / M139) OX=227321 GN=treA PE=3 SV=1	1.95822		25.379		cell wall
Q2U6A1	115452	DNA ligase 4 OS=Aspergillus oryzae (strain ATCC 42149 / RIB 40) OX=510516 GN=lig4 PE=3 SV=1	1.94993			7.95128	Nucleus
Q5B2X8	115539	FACT complex subunit spt16 OS=Emericella nidulans (strain FGSC A4 / ATCC 38163 / CBS 112.46 / NRRL 194 / M139) OX=227321 GN=spt16 PE=3 SV=2			1.7723	5.26298	Nucleus
Q4WXX4	115541	mRNA 3'-end-processing protein rna14 OS=Neosartorya fumigata (strain ATCC MYA-4609 / Af293 / CBS 101355 / FGSC A1100) OX=330879 GN=rna14 PE=3 SV=1				1.88053	Nucleus
Q5BH83	116373	DNA ligase 4 OS=Emericella nidulans (strain FGSC A4 / ATCC 38163 / CBS 112.46 / NRRL 194 / M139) OX=227321 GN=lig4 PE=3 SV=1				2.12347	Nucleus
Q2UCP5;Q5BFH3	117206	5'-3' exoribonuclease 2 OS=Aspergillus oryzae (strain ATCC 42149 / RIB 40) OX=510516 GN=rat1 PE=3 SV=3	2.38781				Nucleus
Q4WVD1	117587	tRNA wybutosine-synthesizing protein 4 OS=Neosartorya fumigata (strain ATCC MYA-4609 / Af293 / CBS 101355 / FGSC A1100) OX=330879 GN=ppm2 PE=3 SV=2		1.69676			Cytoplasm
Q2UBF1	117706	FACT complex subunit spt16 OS=Aspergillus oryzae (strain ATCC 42149 / RIB 40) OX=510516 GN=spt16 PE=3 SV=1			4.5269	5.15482	Nucleus
Q5B5P1	117856	Probable rhamnogalacturonate lyase C OS=Emericella nidulans (strain FGSC A4 / ATCC 38163 / CBS 112.46 / NRRL 194 / M139) OX=227321 GN=rglC PE=3 SV=1	2.10341				Extracellular Region
Q5BH52	118443	tRNA wybutosine-synthesizing protein 4 OS=Emericella nidulans (strain FGSC A4 / ATCC 38163 / CBS 112.46 / NRRL 194 / M139) OX=227321 GN=ppm2 PE=3 SV=3			1.87936		Cytoplasm
Q4WP38	119133	Mitochondrial presequence protease OS=Neosartorya fumigata (strain ATCC MYA-4609 / Af293 / CBS 101355 / FGSC A1100) OX=330879 GN=cym1 PE=3 SV=1				23.7795	Mitochondrion
Q8TFZ1	119463	5'-3' exoribonuclease 2 OS=Neosartorya fumigata (strain ATCC MYA-4609 / Af293 / CBS 101355 / FGSC A1100) OX=330879 GN=rat1 PE=3 SV=4			1.80499	3.13399	Nucleus
Q5AR52	119876	Tyrosinase family protein asqI OS=Emericella nidulans (strain FGSC A4 / ATCC 38163 / CBS 112.46 / NRRL 194 / M139) OX=227321 GN=asqI PE=3 SV=1				16.4779	Mitochondrion
O60039	121243	Anucleate primary sterigmata protein B OS=Emericella nidulans (strain FGSC A4 / ATCC 38163 / CBS 112.46 / NRRL 194 / M139) OX=227321 GN=apsB PE=4 SV=2		2.06132			Cytoplasm
B8NYX0	121417	Cluster 41 polyketide synthase OS=Aspergillus flavus (strain ATCC 200026 / FGSC A1120 / NRRL 3357 / JCM 12722 / SRRC 167) OX=332952 GN=fluP PE=2 SV=1	1.98976	1.85186			Cytoskeleton
G5EB19;Q6RET3	121583	Psi-producing oxygenase A OS=Emericella nidulans (strain FGSC A4 / ATCC 38163 / CBS 112.46 / NRRL 194 / M139) OX=227321 GN=ppoA PE=3 SV=1	1.94534		2.04859	2.75312	Cytoskeleton
Q4WH96	121963	Mediator of RNA polymerase II transcription subunit 14 OS=Neosartorya fumigata (strain ATCC MYA-4609 / Af293 / CBS 101355 / FGSC A1100) OX=330879 GN=rgr1 PE=3 SV=1	1.97122				Nucleus
Q5AZT7	122180	Lon protease homolog_ mitochondrial OS=Emericella nidulans (strain FGSC A4 / ATCC 38163 / CBS 112.46 / NRRL 194 / M139) OX=227321 GN=pim1 PE=3 SV=1	4.21852				Mitochondrion
A2R616	122210	Phosphatidylethanolamine N-methyltransferase OS=Aspergillus niger (strain CBS 513.88 / FGSC A1513) OX=425011 GN=cho2 PE=3 SV=1			2.31717	16.4246	Endoplasmic reticulum
Q4X0Z7	122248	Lon protease homolog_ mitochondrial OS=Neosartorya fumigata (strain ATCC MYA-4609 / Af293 / CBS 101355 / FGSC A1100) OX=330879 GN=pim1 PE=3 SV=1			2.79269		Mitochondrion
Q2USI0	123271	GPI inositol-deacylase OS=Aspergillus oryzae (strain ATCC 42149 / RIB 40) OX=510516 GN=bst1 PE=3 SV=2	2.63841				Endoplasmic reticulum
A1C5W6	123413	Mediator of RNA polymerase II transcription subunit 14 OS=Aspergillus clavatus (strain ATCC 1007 / CBS 513.65 / DSM 816 / NCTC 3887 / NRRL 1) OX=344612 GN=rgr1 PE=3 SV=1			6.53851		Nucleus
Q4WKB5;B0XMV6	123848	ATP-dependent DNA helicase mph1 OS=Neosartorya fumigata (strain ATCC MYA-4609 / Af293 / CBS 101355 / FGSC A1100) OX=330879 GN=mph1 PE=3 SV=1				1.83953	Nucleus
Q2UMJ1	124000	Mediator of RNA polymerase II transcription subunit 14 OS=Aspergillus oryzae (strain ATCC 42149 / RIB 40) OX=510516 GN=rgr1 PE=3 SV=2	2.5764		2.66687	2.25927	Nucleus
P22944	124072	Nitrite reductase [NAD(P)H] OS=Emericella nidulans (strain FGSC A4 / ATCC 38163 / CBS 112.46 / NRRL 194 / M139) OX=227321 GN=niiA PE=3 SV=2		1.56522	3.80579		Cytoplasm
Q0CPP9	124370	DNA mismatch repair protein msh3 OS=Aspergillus terreus (strain NIH 2624 / FGSC A1156) OX=341663 GN=msh3 PE=3 SV=1			4.83074		Nucleus
A2QFK0	124413	Mediator of RNA polymerase II transcription subunit 14 OS=Aspergillus niger (strain CBS 513.88 / FGSC A1513) OX=425011 GN=rgr1 PE=3 SV=2			3.00075		Nucleus
Q2UC64	124855	Protein efr3 OS=Aspergillus oryzae (strain ATCC 42149 / RIB 40) OX=510516 GN=efr3 PE=3 SV=1	4.46573		2.06333		Cytoplasm
Q5B3C8	124862	Stress response protein nst1 OS=Emericella nidulans (strain FGSC A4 / ATCC 38163 / CBS 112.46 / NRRL 194 / M139) OX=227321 GN=nst1 PE=3 SV=1	3.51593				Cytoplasm
A1D4V5	124873	ATP-dependent DNA helicase mph1 OS=Neosartorya fischeri (strain ATCC 1020 / DSM 3700 / CBS 544.65 / FGSC A1164 / JCM 1740 / NRRL 181 / WB 181) OX=331117 GN=mph1 PE=3 SV=1				2.0265	Nucleus
C8VDQ4	125443	Putative GTPase-activating protein AN11010 OS=Emericella nidulans (strain FGSC A4 / ATCC 38163 / CBS 112.46 / NRRL 194 / M139) OX=227321 GN=AN11010 PE=4 SV=1	2.37013				Nucleus
A2Q8R2	125949	ATP-dependent DNA helicase mph1 OS=Aspergillus niger (strain CBS 513.88 / FGSC A1513) OX=425011 GN=mph1 PE=3 SV=2			3.48404	3.09333	Nucleus
Q4WMK2	126903	Nonribosomal peptide synthetase 9 OS=Neosartorya fumigata (strain ATCC MYA-4609 / Af293 / CBS 101355 / FGSC A1100) OX=330879 GN=NRPS9 PE=3 SV=1	15.6761				Cytoplasm
Q4WY82	126917	Linoleate 10R-lipoxygenase OS=Neosartorya fumigata (strain ATCC MYA-4609 / Af293 / CBS 101355 / FGSC A1100) OX=330879 GN=ppoC PE=1 SV=2		2.02796		3.79943	Mitochondrion
Q99014	127139	Protein kinase C-like OS=Hypocrea jecorina OX=51453 GN=pkc1 PE=3 SV=1	2.05111		1.97635		Cytoplasm
Q4WXQ7	128264	Stress response protein nst1 OS=Neosartorya fumigata (strain ATCC MYA-4609 / Af293 / CBS 101355 / FGSC A1100) OX=330879 GN=nst1 PE=3 SV=1			2.47474		Cytoplasm
Q4WLW8	129998	Nonribosomal peptide synthetase fmqC OS=Neosartorya fumigata (strain ATCC MYA-4609 / Af293 / CBS 101355 / FGSC A1100) OX=330879 GN=fmqC PE=1 SV=1			1.68433		Cytoplasm
Q0CIV4	130127	GPI inositol-deacylase OS=Aspergillus terreus (strain NIH 2624 / FGSC A1156) OX=341663 GN=bst1 PE=3 SV=2	2.45734				Endoplasmic reticulum
Q5BBL5	130290	PAN2-PAN3 deadenylation complex catalytic subunit pan2 OS=Emericella nidulans (strain FGSC A4 / ATCC 38163 / CBS 112.46 / NRRL 194 / M139) OX=227321 GN=pan2 PE=3 SV=1			2.73511		Cytoplasm
A2QQA8	130418	Pre-mRNA-processing ATP-dependent RNA helicase prp5 OS=Aspergillus niger (strain CBS 513.88 / FGSC A1513) OX=425011 GN=prp5 PE=3 SV=2	1.83117			2.23662	Nucleus
O93918;Q0CLK1	132020	Pyruvate carboxylase OS=Aspergillus terreus OX=33178 GN=pyc PE=2 SV=1			5.86841		cytoplasm
P17120	132090	Kinesin-like protein bimC OS=Emericella nidulans (strain FGSC A4 / ATCC 38163 / CBS 112.46 / NRRL 194 / M139) OX=227321 GN=bimC PE=2 SV=2	3.59393				Cytoskeleton
A1D731	132364	Stress response protein nst1 OS=Neosartorya fischeri (strain ATCC 1020 / DSM 3700 / CBS 544.65 / FGSC A1164 / JCM 1740 / NRRL 181 / WB 181) OX=331117 GN=nst1 PE=3 SV=1	4.46142	7.56988			Cytoplasm
Q5B1X8	133687	Pre-mRNA-splicing factor rse1 OS=Emericella nidulans (strain FGSC A4 / ATCC 38163 / CBS 112.46 / NRRL 194 / M139) OX=227321 GN=rse1 PE=3 SV=2	2.79143			2.30654	Nucleus
Q5AXH3	134824	Topoisomerase 1-associated factor 1 OS=Emericella nidulans (strain FGSC A4 / ATCC 38163 / CBS 112.46 / NRRL 194 / M139) OX=227321 GN=tof1 PE=3 SV=2				1.78589	Nucleus
Q0CYG9	135224	Protein transport protein sec31 OS=Aspergillus terreus (strain NIH 2624 / FGSC A1156) OX=341663 GN=sec31 PE=3 SV=1	5.9223				Endoplasmic reticulum
A1D9I5	135523	Topoisomerase 1-associated factor 1 OS=Neosartorya fischeri (strain ATCC 1020 / DSM 3700 / CBS 544.65 / FGSC A1164 / JCM 1740 / NRRL 181 / WB 181) OX=331117 GN=tof1 PE=3 SV=1			2.01741		Nucleus
Q4WLI5	135884	Pre-mRNA-splicing factor rse1 OS=Neosartorya fumigata (strain ATCC MYA-4609 / Af293 / CBS 101355 / FGSC A1100) OX=330879 GN=rse1 PE=3 SV=1		1.68906			Nucleus
Q5B3H2	136007	Clustered mitochondria protein homolog OS=Emericella nidulans (strain FGSC A4 / ATCC 38163 / CBS 112.46 / NRRL 194 / M139) OX=227321 GN=clu1 PE=3 SV=2		2.2542			Cytoplasm
A1C928	136286	Topoisomerase 1-associated factor 1 OS=Aspergillus clavatus (strain ATCC 1007 / CBS 513.65 / DSM 816 / NCTC 3887 / NRRL 1) OX=344612 GN=tof1 PE=3 SV=1	1.60393			1.93357	Nucleus
A2QBZ0	136319	Protein transport protein sec31 OS=Aspergillus niger (strain CBS 513.88 / FGSC A1513) OX=425011 GN=sec31 PE=3 SV=1		1.55076			Endoplasmic reticulum
[truncated: 85 more rows]

## Sheet: Table S10
Table S10. Fungal proteins upregulated in Aspergillus flavus colonizing WT-genotype during infection
[truncated: 800 more rows]
